# Supplementary material for: A CuBr-mediated aerobic reaction of 2-alkynylbenzaldehydes and primary amines: synthesis of 4-bromoisoquinolones
Source: Royal Society of Chemistry journal article supplement (doi:10.1039/c2cc33426g), 2012-01-01

## Electronic Supplementary Information

### A CuBr-Mediated Expedient Synthesis of 4-Bromoisouquinolones from 2-Alkynylbenzaldehydes and Primary Amines under an O<sub>2</sub> atmosphere

Pei Chui Too and Shunsuke Chiba\*

*Division of Chemistry and Biological Chemistry, School of Physical and Mathematical Sciences,  
Nanyang Technological University, Singapore 637371, Singapore*

Fax: +65-67911961; E-mail: shunsuke@ntu.edu.sg

|                                                                                 |            |
|---------------------------------------------------------------------------------|------------|
| <b>1. General</b>                                                               | <b>S2</b>  |
| <b>2. Synthesis of 2-alkynylbenzaldehyde derivatives</b>                        |            |
| <b>2.1. Preparation of 2-alkynylbenzaldehyde 1a-b &amp; 1k-1s</b>               | <b>S2</b>  |
| <b>2.2. Preparation of 2-arylethynylbenzaldehyde 1c-1j</b>                      | <b>S6</b>  |
| <b>3. CuBr-mediated synthesis of 4-bromoisouquinolones</b>                      | <b>S9</b>  |
| <b>3.1. A typical procedure for synthesis of 3aa</b>                            | <b>S9</b>  |
| <b>3.2. The reactions with CuCl and CuI</b>                                     | <b>S19</b> |
| <b>3.3. The reactions with β-alanine ethyl ester (2m) and propargylamine 2n</b> | <b>S21</b> |
| <b>4. Control experiments to elucidate the reaction mechanism</b>               | <b>S22</b> |
| <b>5. <sup>1</sup>H and <sup>13</sup>C NMR spectrum of new compounds</b>        | <b>S24</b> |

## 1. General

<sup>1</sup>H NMR (400MHz) spectra were recorded on a Bruker Avance 400 spectrometers in CDCl<sub>3</sub> [using (CH<sub>3</sub>)<sub>4</sub>Si (for <sup>1</sup>H, δ = 0.00) as internal standard]. <sup>13</sup>C NMR (100 MHz) spectra on a Bruker Avance 400 spectrometers in CDCl<sub>3</sub> [using CDCl<sub>3</sub> (for <sup>13</sup>C, δ = 77.00) as internal standard]. The following abbreviations were used to explain the multiplicities: s = singlet, d = doublet, t = triplet, q = quartet, qn = quintet, m = multiplet, brs = broad singlet, brd = broad doublet. IR spectra were recorded on a Shimadzu IR Prestige-21 FT-IR Spectrometer. High-resolution mass spectra were obtained with a Finnigan MAT 95 XP mass spectrometer (Thermo Electron Corporation). Melting points were uncorrected and were recorded on a Buchi B-54 melting point apparatus.

Flash column chromatography was performed using Merck silica gel 60 with distilled solvents. Benzene was used without further purification. CuBr·SMe<sub>2</sub> (99%) was purchased from Sigma-Aldrich Co., Inc. All amines **2** were purchased from Sigma-Aldrich Co., Inc. except for **2f**,<sup>1</sup> **2m**<sup>2</sup> and **2n**<sup>3</sup>.

## 2. Synthesis of 2-alkynylbenzaldehyde derivatives

### 2.1. Preparation of 2-alkynylbenzaldehyde 1a-b & 1k-1s: a typical procedure for synthesis of 2-(2-phenylethynyl)benzaldehyde (1a).

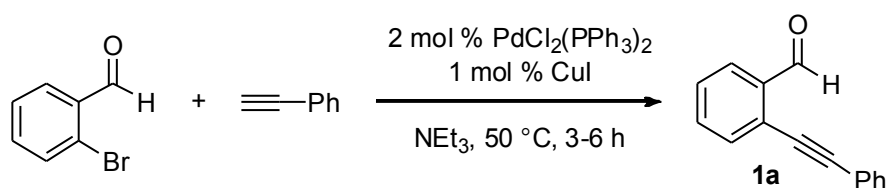

To a solution of 2-bromobenzaldehyde (3.70 g, 20.0 mmol), PdCl<sub>2</sub>(PPh<sub>3</sub>)<sub>2</sub> (0.28 g, 0.40 mmol), and CuI (38 mg, 0.20 mmol) in 80 mL of NEt<sub>3</sub> was added phenylacetylene (2.08 g, 20.4 mmol). The resulting mixture was heated under nitrogen atmosphere at 50 °C. After the reaction was completed, the reaction mixture was quenched with distilled water and extracted with ethyl acetate (50 mL × 3). The combined extracts were washed with brine and dried over MgSO<sub>4</sub>. Volatile materials were removed in vacuo and the resulting crude material was purified by flash column chromatography (Si gel, hexane : ethyl acetate = 95 : 5) to give 2-(2-phenylethynyl)benzaldehyde (**1a**) in 94% yield.

### 2-(2-Phenylethynyl)benzaldehyde (1a)<sup>4</sup>

Brown oil; <sup>1</sup>H NMR (400 MHz, CDCl<sub>3</sub>) δ 7.36-7.40 (3H, m), 7.45 (1H, tt, *J* = 0.8, 7.6 Hz), 7.55-7.60 (3H, m), 7.64 (1H, dd, *J* = 0.8, 7.6 Hz), 7.95 (1H, dd, *J* = 0.8, 7.6 Hz), 10.65 (d, *J* = 0.4 Hz); <sup>13</sup>C NMR (100 MHz, CDCl<sub>3</sub>) δ 84.8, 96.3, 122.3, 126.8, 127.2, 128.5, 128.6, 129.0, 131.6, 133.2, 133.7, 135.8, 191.7.

### 2-[2-(4-Methoxyphenyl)ethynyl]benzaldehyde (1b)<sup>5</sup>

<sup>1</sup> R. F. Nystrom, *J. Am. Chem. Soc.* 1953, 75, 292.

<sup>2</sup> A. Rayan, M. Falah, *U.S. Pat. Appl. Publ.* 20100284959, 2010.

<sup>3</sup> M. Lemhadri, H. Doucet, M. Santelli, *Synthesis* 2005, 1359.

<sup>4</sup> J. H. Park, S. V. Bhilare, S. W. Youn, *Org. Lett.* 2011, 13, 2228.

<sup>5</sup> S. Obika, H. Kono, Y. Yasui, R. Yanada, Y. Takemoto, *J. Org. Chem.* 2007, 72, 4462.

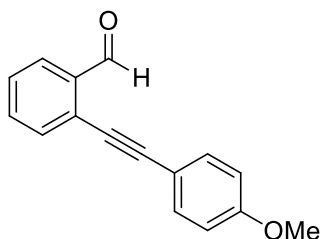

Prepared from 2-bromobenzaldehyde and 1-ethynyl-4-methoxybenzene, and purified by by flash column chromatography (Si gel, hexane:ethyl acetate = 95:5) in quantitative yield; White solid;  $^1\text{H}$  NMR (400 MHz,  $\text{CDCl}_3$ )  $\delta$  3.84 (3H, s), 6.91 (2H, td,  $J = 2.4, 8.8$  Hz), 7.42 (1H, dt,  $J = 0.4, 7.2$  Hz), 7.50 (2H, td,  $J = 2.4, 8.8$  Hz), 7.56 (1H, dt,  $J = 1.6, 7.6$  Hz), 7.61 (1H, dd,  $J = 0.8, 7.2$  Hz), 7.93 (1H, dd,  $J = 0.8, 8.0$  Hz), 10.64 (1H, d,  $J = 0.8$  Hz);  $^{13}\text{C}$  NMR (100 MHz,  $\text{CDCl}_3$ )  $\delta$  55.3, 83.7, 96.6, 114.1, 114.3, 127.1, 127.3, 128.2, 133.0, 133.2, 133.7, 135.6, 160.2, 191.8.

### 2-(Hept-1-ynyl)benzaldehyde (1k)<sup>6</sup>

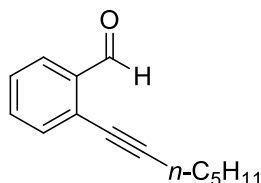

Prepared from 2-bromobenzaldehyde and 1-heptyne and purified by by flash column chromatography (Si gel, hexane:ethyl acetate = 95:5) in 89% yield; Yellow oil;  $^1\text{H}$  NMR (400 MHz,  $\text{CDCl}_3$ )  $\delta$  0.93 (3H, t,  $J = 7.2$  Hz), 1.32-1.49 (4H, m), 1.65 (2H, tt,  $J = 6.8, 7.6$  Hz), 2.48 (2H, t,  $J = 7.2$  Hz), 7.35-7.40 (1H, m), 7.48-7.55 (2H, m), 7.89 (1H, d,  $J = 8.0$  Hz), 10.54 (1H, d,  $J = 0.4$  Hz);  $^{13}\text{C}$  NMR (100 MHz,  $\text{CDCl}_3$ )  $\delta$  13.9, 19.5, 22.1, 28.2, 31.1, 76.3, 98.2, 126.8, 127.8, 127.9, 133.2, 133.6, 135.9, 192.2.

### 2-(Cyclohexylethynyl)benzaldehyde (1l)<sup>7</sup>

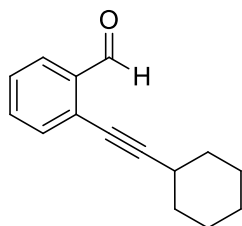

Prepared from 2-bromobenzaldehyde and andcyclohexylacetylene, and purified by by flash column chromatography (Si gel, hexane:ethyl acetate = 95:5) in quantitative yield; Yellow oil;  $^1\text{H}$  NMR (400 MHz,  $\text{CDCl}_3$ )  $\delta$  1.32-1.45 (3H, m), 1.46-1.61 (3H, m), 1.71-1.80 (2H, m), 1.87-1.95 (2H, m), 2.68 (1H, m), 7.35-7.40 (1H, m), 7.48-7.54 (2H, m), 7.88 (1H, d,  $J = 7.6$  Hz), 10.56 (1H, d,  $J = 0.8$  Hz);  $^{13}\text{C}$  NMR (100 MHz,  $\text{CDCl}_3$ )  $\delta$  24.8, 25.8, 29.8, 32.4, 76.2, 102.1, 126.8, 127.8, 128.0, 133.2, 133.6, 135.8, 192.2.

### 2-(2-Cyclopropylethynyl)benzaldehyde (1m)<sup>4</sup>

<sup>6</sup> A. Hamze, O. Provot, M. Alami, J.-D. Brion, *Org. Lett.* **2005**, *7*, 5625.

<sup>7</sup> A. K. Verma, V. Rustagi, T. Aggarwal, A. P. Singh, *J. Org. Chem.* **2010**, *75*, 7691.

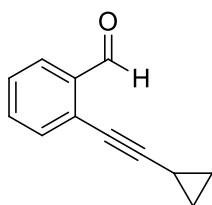

Prepared from 2-bromobenzaldehyde and cyclopropylacetylene, and purified by by flash column chromatography (Si gel, hexane:ethyl acetate = 95:5) in quantitative yield; Yellow oil;  $^1\text{H}$  NMR (400 MHz,  $\text{CDCl}_3$ )  $\delta$  0.83-0.90 (2H, m), 0.90-0.98 (2H, m), 1.48-1.56 (1H, m), 7.36 (1H, t,  $J = 7.6$  Hz), 7.46-7.53 (2H, m), 7.87 (1H, d,  $J = 8.0$  Hz), 10.49 (1H, s);  $^{13}\text{C}$  NMR (100 MHz,  $\text{CDCl}_3$ )  $\delta$  0.3, 8.9, 71.4, 101.2, 126.9, 127.7, 127.8, 133.2, 133.6, 136.0, 192.1.

### 3-Methyl-2-(phenylethynyl)benzaldehyde (1n)

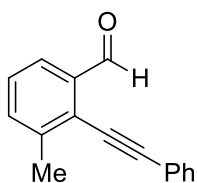

Prepared from 2-bromo-3-methylbenzaldehyde and phenylacetylene, and purified by by flash column chromatography (Si gel, hexane:ethyl acetate = 95:5) in 96% yield; Brown solid; mp. 48–50 °C; IR (neat) 691, 756, 1242, 1489, 1682, 1701  $\text{cm}^{-1}$ ;  $^1\text{H}$  NMR (400 MHz,  $\text{CDCl}_3$ )  $\delta$  2.59 (3H, s), 7.35 (1H, t,  $J = 7.6$  Hz), 7.38-7.42 (3H, m), 7.50 (1H, d,  $J = 7.6$  Hz), 7.56-7.60 (2H, m), 7.80 (1H, dd,  $J = 0.4, 8.0$  Hz), 10.69 (1H, d,  $J = 0.8$  Hz);  $^{13}\text{C}$  NMR (100 MHz,  $\text{CDCl}_3$ )  $\delta$  20.5, 83.6, 100.8, 122.6, 124.6, 126.6, 128.1, 128.5, 129.0, 131.5, 134.8, 136.0, 141.5, 192.3; ESIHRMS: Found:  $m/z$  221.0964. Calcd for  $\text{C}_{16}\text{H}_{13}\text{O}$ :  $(\text{M}+\text{H})^+$  221.0966.

### 4,5-Dimethoxy-2-(2-phenylethynyl)benzaldehyde (1o)<sup>4</sup>

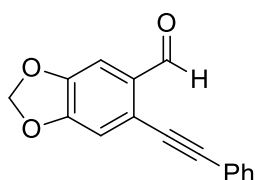

Prepared from 6-bromo-1,3-benzodioxole-5-carboxaldehyde and phenylacetylene, and purified by flash column chromatography (Si gel, hexane:ethyl acetate = 95:5) in 93% yield; White solid;  $^1\text{H}$  NMR (400 MHz,  $\text{CDCl}_3$ )  $\delta$  6.10 (2H, s), 7.03 (1H, s), 7.37 (1H, s), 7.36-7.40 (3H, m), 7.52-7.56 (2H, m), 10.49 (1H, s);  $^{13}\text{C}$  NMR (100 MHz,  $\text{CDCl}_3$ )  $\delta$  84.7, 95.1, 102.4, 106.1, 112.0, 122.3, 123.6, 128.5, 129.0, 131.6, 132.1, 148.7, 152.4, 190.0.

### 5-Methoxy-2-(phenylethynyl)benzaldehyde (1p)<sup>4</sup>

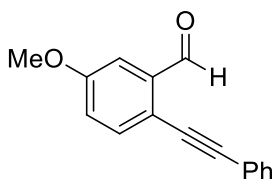

Prepared from 2-bromo-5-methoxybenzaldehyde and phenylacetylene, and purified by flash column chromatography (Si gel, hexane:ethyl acetate = 95:5) in 95% yield; Brown solid;  $^1\text{H}$  NMR (400 MHz,  $\text{CDCl}_3$ )  $\delta$  3.88 (3H, s), 7.14 (1H, dd,  $J = 2.8, 8.8$  Hz), 7.35-7.39 (3H, m), 7.43 (1H, d,  $J = 2.8$  Hz), 7.53-7.58 (3H, m), 10.62 (1H, s);  $^{13}\text{C}$  NMR (100 MHz,  $\text{CDCl}_3$ )  $\delta$  55.6, 84.8, 94.8, 109.8, 119.6, 121.7, 122.6, 128.5, 128.7, 131.5, 134.5, 137.2, 159.8, 191.6.

### 5-Fluoro-2-(phenylethynyl)benzaldehyde (1q)<sup>5</sup>

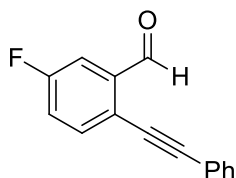

Prepared from 2-bromo-5-fluorobenzaldehyde and phenylacetylene, and purified by flash column chromatography (Si gel, hexane:ethyl acetate = 95:5) in 91% yield; Pale yellow solid;  $^1\text{H}$  NMR (400 MHz,  $\text{CDCl}_3$ )  $\delta$  7.30 (1H, dt,  $J = 2.8, 8.0$  Hz), 7.37-7.41 (3H, m), 7.54-7.57 (2H, m), 7.60-7.67 (2H, m), 10.60 (1H, d,  $J = 3.2$  Hz);  $^{13}\text{C}$  NMR (100 MHz,  $\text{CDCl}_3$ )  $\delta$  83.8, 96.0, 113.7 (d,  $J = 22.9$  Hz), 121.3 (d,  $J = 22.5$  Hz), 122.1, 123.0 (d,  $J = 3.6$  Hz), 128.5, 129.1, 131.6, 135.2 (d,  $J = 7.6$  Hz), 137.7 (d,  $J = 6.5$  Hz), 162.3 (d,  $J = 251.2$  Hz), 190.4.

### 3-(Phenylethynyl)benzofuran-2-carbaldehyde (1r)

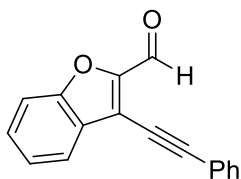

Prepared from 3-bromobenzofuran-2-carbaldehyde and phenylacetylene, and purified by flash column chromatography (Si gel, hexane:ethyl acetate = 95:5) in 96% yield; Brown solid; mp. 99–101 °C; IR (neat) 685, 748, 881, 1294, 1339, 1667  $\text{cm}^{-1}$ ;  $^1\text{H}$  NMR (400 MHz,  $\text{CDCl}_3$ )  $\delta$  7.40-7.46 (4H, m), 7.58 (1H, dt,  $J = 1.2, 8.8$  Hz), 7.60-7.66 (3H, m), 7.89 (1H, d,  $J = 8.0$  Hz), 10.13 (1H, s);  $^{13}\text{C}$  NMR (100 MHz,  $\text{CDCl}_3$ )  $\delta$  77.1, 100.1, 112.8, 115.9, 121.8, 122.5, 124.5, 127.5, 128.6, 129.6, 130.0, 131.9, 152.5, 155.4, 178.0; ESIHRMS: Found:  $m/z$  247.0761. Calcd for  $\text{C}_{17}\text{H}_{11}\text{O}_2$ :  $(\text{M}+\text{H})^+$  247.0759.

### 2-(Phenylethynyl)nicotinaldehyde (1s)<sup>5</sup>

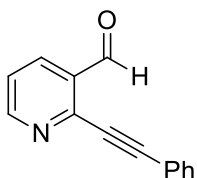

Prepared from 2-bromonicotinaldehyde and phenylacetylene, and purified by flash column chromatography (Si gel, hexane:ethyl acetate = 80:20) in 88% yield; Brown solid;  $^1\text{H}$  NMR (400 MHz,  $\text{CDCl}_3$ )  $\delta$  7.37-7.44 (4H, m), 7.64 (2H, d,  $J = 6.8$  Hz), 8.20 (1H, d,  $J = 7.6$  Hz), 8.81 (1H, d,  $J = 4.4$  Hz), 10.66 (1H, s);  $^{13}\text{C}$  NMR (100 MHz,  $\text{CDCl}_3$ )  $\delta$  84.6, 95.9, 121.1, 123.1, 128.4, 129.7, 131.6, 132.0, 134.6, 145.8, 154.3, 190.6.

## 2.2. Preparation of 2-arylethynylbenzaldehyde 1c-1j: a typical procedure for the synthesis of 2-[2-(4-methylphenyl)ethynyl]benzaldehyde (1c)

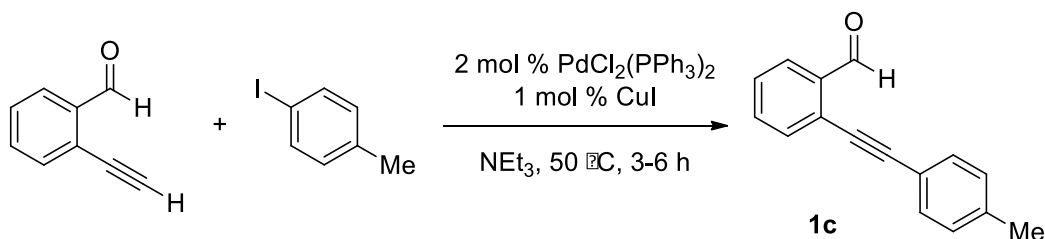

To a solution of 2-ethynylbenzaldehyde<sup>1</sup> (195 mg, 1.5 mmol), PdCl<sub>2</sub>(PPh<sub>3</sub>)<sub>2</sub> (21 mg, 0.03 mmol), and CuI (2.9 mg, 0.015 mmol) in 6 mL of NEt<sub>3</sub> was added the 1-iodo-4-methylbenzene (393 mg, 1.8 mmol). The resulting mixture was heated under nitrogen atmosphere at 50 °C. After the reaction was completed, the reaction mixture was quenched with distilled water and extracted with ethyl acetate (50 mL × 3). Volatile materials were removed in vacuo and the crude material was purified by flash column chromatography (Si gel, hexane:ethyl acetate = 95:5) to give 2-[2-(4-methylphenyl)ethynyl]benzaldehyde (**1c**) in 85% yield.

### 2-[2-(4-Methylphenyl)ethynyl]benzaldehyde (**1c**)<sup>8</sup>

Yellow solid; <sup>1</sup>H NMR (400 MHz, CDCl<sub>3</sub>) δ 2.39 (3H, s), 7.19 (2H, d, *J* = 8.0 Hz), 7.43 (1H, tt, *J* = 0.8, 7.2 Hz), 7.46 (2H, d, *J* = 8.0 Hz), 7.57 (1H, dt, *J* = 1.6, 7.6 Hz), 7.63 (1H, dd, *J* = 0.8, 7.6 Hz), 7.94 (1H, dd, *J* = 0.8, 7.6 Hz), 10.65 (1H, d, *J* = 0.8 Hz); <sup>13</sup>C NMR (100 MHz, CDCl<sub>3</sub>) δ 21.6, 84.3, 96.6, 119.2, 127.1, 128.4, 129.3, 131.6 (overlapped), 133.1, 133.7, 135.7, 139.4, 191.8.

### 2-[2-(4-Fluorophenyl)ethynyl]benzaldehyde (**1d**)

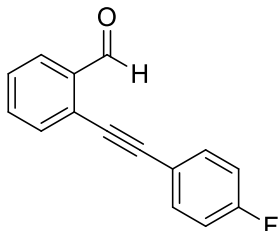

Prepared from 2-ethynylbenzaldehyde and 4-fluoroiodobenzene, and purified by flash column chromatography (Si gel, hexane:ethyl acetate = 95:5) in 82% yield; White solid; mp. 79–81 °C; IR (neat) 758, 829, 1233, 1506, 1591, 1684 cm<sup>-1</sup>; <sup>1</sup>H NMR (400 MHz, CDCl<sub>3</sub>) δ 7.08 (2H, tt, *J* = 2.0, 8.8 Hz), 7.46 (1H, t, *J* = 7.6 Hz), 7.53–7.61 (3H, m), 7.63 (1H, dd, *J* = 0.8, 7.6 Hz), 7.95 (1H, dd, *J* = 0.8, 7.6 Hz), 10.62 (1H, d, *J* = 0.4 Hz); <sup>13</sup>C NMR (100 MHz, CDCl<sub>3</sub>) δ 84.6, 95.2, 155.9 (d, *J* = 21.9 Hz), 118.4 (d, *J* = 3.5 Hz), 126.6, 127.4, 128.7, 133.2, 133.6 (d, *J* = 8.5 Hz), 133.8, 135.8, 162.9 (d, *J* = 249.6 Hz), 191.5; ESIHRMS: Found: *m/z* 225.0711. Calcd for C<sub>15</sub>H<sub>10</sub>FO: (M+H)<sup>+</sup> 225.0716.

### Ethyl 4-((2-formylphenyl)ethynyl)benzoate (**1e**)<sup>9</sup>

<sup>8</sup> J. D. Tovar, T. M. Swager, *J. Org. Chem.* **1999**, *64*, 6499.

<sup>9</sup> C. P. Allen, T. Benkovics, A. K. Turek, T. P. Yoon, *J. Am. Chem. Soc.* **2009**, *131*, 12560.

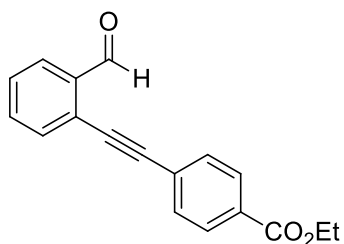

Prepared from 2-ethynylbenzaldehyde and ethyl 4-iodobenzoate, and purified by flash column chromatography (Si gel, hexane:ethyl acetate = 90:10) in 86% yield; Pale yellow solid;  $^1\text{H}$  NMR (400 MHz,  $\text{CDCl}_3$ )  $\delta$  1.42 (3H, t,  $J = 7.2$  Hz), 4.40 (2H, q,  $J = 7.2$  Hz), 7.50 (1H, t,  $J = 7.6$  Hz), 7.59-7.65 (3H, m), 7.67 (1H, dd,  $J = 0.8, 7.2$  Hz), 7.97 (1H, dd,  $J = 0.8, 7.6$  Hz), 8.06 (2H, td,  $J = 1.6, 8.4$  Hz), 10.64 (1H, s);  $^{13}\text{C}$  NMR (100 MHz,  $\text{CDCl}_3$ )  $\delta$  14.3, 61.2, 87.6, 95.3, 126.1, 126.8, 127.5, 129.1, 129.6, 130.6, 131.5, 133.4, 133.8, 135.9, 165.9, 191.3.

### 2-[2-(4-Trifluoromethylphenyl)ethynyl]benzaldehyde (1f)<sup>5</sup>

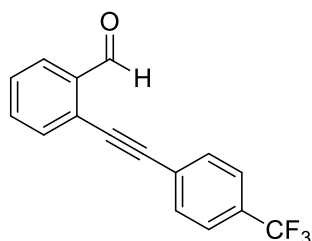

Prepared from 2-ethynylbenzaldehyde and 1-iodo-4-(trifluoromethyl)benzene, and purified by flash column chromatography (Si gel, hexane:ethyl acetate = 95:5) in 74% yield; Pale yellow solid;  $^1\text{H}$  NMR (400 MHz,  $\text{CDCl}_3$ )  $\delta$  7.50 (1H, t,  $J = 7.6$  Hz), 7.61 (1H, dt,  $J = 1.2, 7.6$  Hz), 7.63-7.70 (5H, m), 7.97 (1H, dd,  $J = 1.2, 7.6$  Hz), 10.62 (1H, d,  $J = 0.8$  Hz);  $^{13}\text{C}$  NMR (100 MHz,  $\text{CDCl}_3$ )  $\delta$  87.2, 94.5, 123.8 (q,  $J = 270.6$  Hz), 125.5 (q,  $J = 3.7$  Hz), 125.8, 126.1, 127.6, 129.2, 130.7 (q,  $J = 32.7$  Hz), 131.9, 133.4, 133.8, 136.0, 191.2.

### 2-[2-(3-Methoxyphenyl)ethynyl]benzaldehyde (1g)<sup>10</sup>

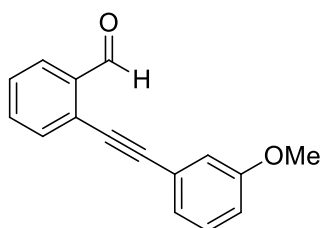

Prepared from 2-ethynylbenzaldehyde and 1-bromo-3-methoxybenzene, and purified by flash column chromatography (Si gel, hexane:ethyl acetate = 90:10) in 88% yield; Brown oil;  $^1\text{H}$  NMR (400 MHz,  $\text{CDCl}_3$ )  $\delta$  3.84 (3H, s), 6.95 (1H, ddd,  $J = 0.8, 2.4, 8.4$  Hz), 7.08 (1H, q,  $J = 1.2$  Hz), 7.16 (1H, d,  $J = 7.6$  Hz), 7.29 (1H, t,  $J = 7.6$  Hz), 7.45 (1H, t,  $J = 7.6$  Hz), 7.58 (1H, dt,  $J = 1.2, 7.6$  Hz), 7.65 (1H, d,  $J = 7.6$  Hz), 7.95 (1H, dd,  $J = 0.8, 7.6$  Hz), 10.65 (1H, s);  $^{13}\text{C}$  NMR (100 MHz,  $\text{CDCl}_3$ )  $\delta$  55.3, 84.6, 96.2, 115.7, 116.3, 123.3, 124.2, 126.8, 127.2, 128.6, 129.6, 133.2, 133.8, 135.8, 159.4, 191.7.

### 2-[2-(2-Methoxyphenyl)ethynyl]benzaldehyde (1h)<sup>11</sup>

<sup>10</sup> N. T. Patil, A. Konala, V. Singh, V. V. N. Reddy, *Eur. J. Org. Chem.* **2009**, 5178.

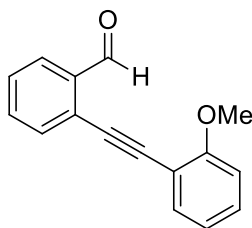

Prepared from 2-ethynylbenzaldehyde and 1-bromo-2-methoxybenzene, and purified by by flash column chromatography (Si gel, hexane:ethyl acetate = 90:10) in 87% yield; Pale yellow solid;  $^1\text{H}$  NMR (400 MHz,  $\text{CDCl}_3$ )  $\delta$  3.92 (3H, s), 6.92 (1H, d,  $J = 8.0$  Hz), 6.96 (1H, t,  $J = 7.2$  Hz), 7.35 (1H, dt,  $J = 1.6, 8.0$  Hz), 7.42 (1H, t,  $J = 7.6$  Hz), 7.51 (1H, dd,  $J = 1.6, 7.2$  Hz), 7.56 (1H, dt,  $J = 1.2, 7.6$  Hz), 7.65 (1H, dd,  $J = 0.4, 8.0$  Hz), 7.95 (1H, dd,  $J = 0.8, 7.6$  Hz), 10.74 (1H, d,  $J = 0.8$  Hz);  $^{13}\text{C}$  NMR (100 MHz,  $\text{CDCl}_3$ )  $\delta$  55.8, 89.0, 93.0, 110.6, 111.6, 120.5, 126.9, 127.4, 128.3, 130.5, 132.9, 133.2, 133.6, 135.8, 160.4, 192.5.

### 2-[2-(2-Bromophenyl)ethynyl]benzaldehyde (1i)<sup>12</sup>

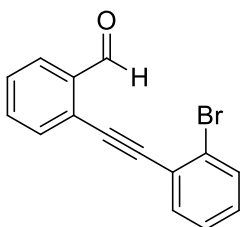

Prepared from 2-ethynylbenzaldehyde and 2-bromoiodobenzene, and purified by flash column chromatography (Si gel, hexane:ethyl acetate = 95:5) in 94% yield; White solid;  $^1\text{H}$  NMR (400 MHz,  $\text{CDCl}_3$ )  $\delta$  7.24 (1H, dt,  $J = 1.6, 7.6$  Hz), 7.34 (1H, dt,  $J = 1.2, 7.6$  Hz), 7.48 (1H, t,  $J = 7.6$  Hz), 7.58-7.63 (2H, m), 7.64 (1H, dd,  $J = 0.8, 8.0$  Hz), 7.70 (1H, dd,  $J = 0.8, 8.0$  Hz), 7.97 (1H, dd,  $J = 1.2, 8.0$  Hz), 10.76 (1H, s);  $^{13}\text{C}$  NMR (100 MHz,  $\text{CDCl}_3$ )  $\delta$  89.3, 94.6, 124.6, 125.8, 126.4, 127.1, 127.2, 129.0, 130.1, 132.6, 133.4, 133.5, 133.8, 136.1, 191.9.

### 2-[2-(2-Naphthyl)ethynyl]benzaldehyde (1j)

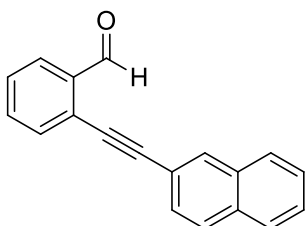

Prepared from 2-ethynylbenzaldehyde and 2-iodonaphthalene, and purified by flash column chromatography (Si gel, hexane:ethyl acetate = 95:5) in 67% yield; White solid; mp. 73–75 °C; IR (neat) 743, 758, 1263, 1506, 1591, 1653, 1690  $\text{cm}^{-1}$ ;  $^1\text{H}$  NMR (400 MHz,  $\text{CDCl}_3$ )  $\delta$  7.48 (1H, t,  $J = 7.6$  Hz), 7.51-7.56 (2H, m), 7.58-7.64 (2H, m), 7.70 (1H, dd,  $J = 0.8, 8.0$  Hz), 7.83-7.88 (3H, m), 7.98 (1H, dd,  $J = 0.8, 8.0$  Hz), 8.11 (1H, s), 10.73 (1H, d,  $J = 0.4$  Hz);  $^{13}\text{C}$  NMR (100 MHz,  $\text{CDCl}_3$ )  $\delta$  85.2, 96.8, 119.5, 126.8, 126.9, 127.1, 127.3, 127.8, 127.9, 128.0, 128.2, 128.6, 131.9, 132.9,

<sup>11</sup> M. Alfonsi, M. Dell'Acqua, D. Facchetti, A. Arcadi, G. Abbiati, E. Rossi, *Eur. J. Org. Chem.* **2009**, 2852–2862

<sup>12</sup> D. P. Iwaniuk, C. Wolf, *Org. Lett.* **2011**, *13*, 2602.



133.1, 133.2, 133.8, 135.8, 191.7; ESIHRMS: Found:  $m/z$  257.0964. Calcd for  $C_{19}H_{13}O$ :  $(M+H)^+$  257.0966.

### 3. CuBr-mediated synthesis of 4-bromoisoquinolones:

#### 3.1. A typical procedure for synthesis of **3aa** (Table 1, entry 6).

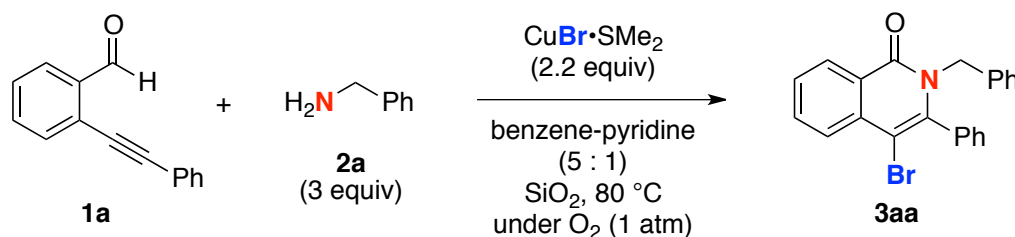

To a stirred solution of 2-alkynylbenzaldehyde (**1a**) (105.0 mg, 0.509 mmol),  $CuBr \cdot SMe_2$  (230.2 mg, 1.12 mmol) and  $SiO_2$  (0.3 g) in 5 mL of solvent (benzene : pyridine = 5 : 1) at  $80^\circ C$  under  $O_2$  atmosphere were added benzylamine (**2a**) [(55  $\mu L \times 3$ ), (0.509  $\times 3$ ) mmol] three times at every 1 h interval, and the reaction mixture was allowed to stir for another 1 h. After cooled to room temperature, the reaction was quenched with pH 9 buffer and extracted with ethyl acetate (20 mL  $\times$  3). The combined extracts were washed with brine and dried over  $MgSO_4$ . Volatile materials were removed in vacuo, and the resulting crude material was purified by flash column chromatography (Si gel, hexane:ethyl acetate = 90:10) to give 2-benzyl-4-bromo-3-phenylisoquinolin-1(2H)-one (**3aa**) (158.0 mg, 0.405 mmol) in 80% yield.

#### 2-Benzyl-4-bromo-3-phenylisoquinolin-1(2H)-one (**3aa**)

Sticky yellow oil; IR (neat) 694, 752, 1337, 1582, 1607, 1647  $cm^{-1}$ ;  $^1H$  NMR (400 MHz,  $CDCl_3$ )  $\delta$  5.16 (2H, brs), 6.80-6.86 (2H, m), 7.06 (2H, d,  $J = 7.2$  Hz), 7.13-7.18 (3H, m), 7.35 (2H, dd,  $J = 7.2, 7.6$  Hz), 7.42 (1H, t,  $J = 7.2$  Hz), 7.58 (1H, dt,  $J = 0.8, 7.6$  Hz), 7.76 (1H, dt,  $J = 1.2, 7.6$  Hz), 8.00 (1H, d,  $J = 8.0$  Hz), 8.55 (1H, dd,  $J = 0.8, 8.0$  Hz);  $^{13}C$  NMR (100 MHz,  $CDCl_3$ )  $\delta$  49.9, 102.8, 125.5, 126.5, 126.7, 127.0, 127.7, 128.2, 128.4, 128.5, 129.2, 129.4, 133.3, 135.5, 135.6, 137.1, 142.2, 162.1; ESIHRMS: Found:  $m/z$  390.0490. Calcd for  $C_{22}H_{17}NO$   $^{79}Br$ :  $(M+H)^+$  390.0494.

#### –Table 2–

#### 4-Bromo-2-(4-methoxybenzyl)-3-phenylisoquinolin-1(2H)-one (**3ab**)

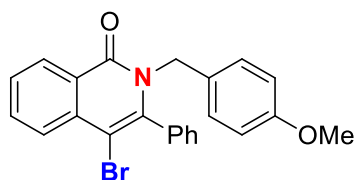

Yellow oil; IR (neat) 748, 1032, 1177, 1246, 1510, 1582, 1607, 1647  $cm^{-1}$ ;  $^1H$  NMR (400 MHz,  $CDCl_3$ )  $\delta$  3.74 (3H, s), 5.10 (2H, brs), 6.69 (2H, td,  $J = 1.6, 8.8$  Hz), 6.76 (2H, d,  $J = 8.8$  Hz), 7.09 (2H, d,  $J = 7.2$  Hz), 7.39 (2H, t,  $J = 7.6$  Hz), 7.45 (1H, t,  $J = 7.6$  Hz), 7.59 (1H, ddd,  $J = 0.8, 7.2, 8.0$  Hz), 7.78 (1H, ddd,  $J = 1.2, 7.2, 8.0$  Hz), 8.01 (1H, d,  $J = 8.0$  Hz), 8.55 (1H, dd,  $J = 0.8, 8.0$  Hz);  $^{13}C$  NMR (100 MHz,  $CDCl_3$ )  $\delta$  49.4, 55.2, 102.8, 113.6, 125.6, 126.5, 127.7, 128.35, 128.41, 128.5, 129.2, 129.3, 129.6, 133.3, 135.6, 135.7, 142.2, 158.7, 162.2; ESIHRMS: Found:  $m/z$  420.0599. Calcd for  $C_{23}H_{19}NO_2$   $^{79}Br$ :  $(M+H)^+$  420.0599.

#### 4-Bromo-2-(4-methylbenzyl)-3-phenylisoquinolin-1(2H)-one (3ac)

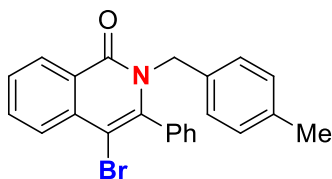

Yellow oil; IR (neat) 692, 907, 1034, 1246, 1510, 1647  $\text{cm}^{-1}$ ;  $^1\text{H}$  NMR (400 MHz,  $\text{CDCl}_3$ )  $\delta$  2.27 (3H, s), 5.11 (2H, brs), 6.73 (2H, d,  $J = 8.0$  Hz), 6.97 (2H, d,  $J = 8.0$  Hz), 7.09 (2H, d,  $J = 6.8$  Hz), 7.38 (2H, dd,  $J = 6.8, 7.6$  Hz), 7.44 (1H, tt,  $J = 1.2, 7.6$  Hz), 7.60 (1H, ddd,  $J = 1.2, 7.2, 7.6$  Hz), 7.78 (1H, ddd,  $J = 1.2, 7.2, 8.4$  Hz), 8.01 (1H, d,  $J = 8.0$  Hz), 8.55 (1H, dd,  $J = 0.8, 8.0$  Hz);  $^{13}\text{C}$  NMR (100 MHz,  $\text{CDCl}_3$ )  $\delta$  21.0, 49.8, 102.7, 125.6, 126.5, 126.7, 127.7, 128.4, 128.5, 128.9, 129.2, 129.5, 133.2, 134.1, 135.5, 135.7, 136.6, 142.3, 162.1; ESIHRMS: Found:  $m/z$  404.0650. Calcd for  $\text{C}_{23}\text{H}_{19}\text{NO}^{79}\text{Br}$ :  $(\text{M}+\text{H})^+$  404.0650.

#### 4-Bromo-2-(4-fluorobenzyl)-3-phenylisoquinolin-1(2H)-one (3ad)

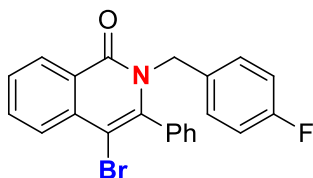

Yellow solid; mp. 149–151  $^{\circ}\text{C}$ ; IR (neat) 750, 1219, 1335, 1508, 1582, 1638  $\text{cm}^{-1}$ ;  $^1\text{H}$  NMR (400 MHz,  $\text{CDCl}_3$ )  $\delta$  5.13 (2H, brs), 6.77–6.88 (4H, m), 7.07 (2H, d,  $J = 7.2$  Hz), 7.39 (2H, dd,  $J = 7.2, 8.0$  Hz), 7.46 (1H, tt,  $J = 1.2, 7.2$  Hz), 7.61 (1H, ddd,  $J = 0.8, 7.2, 8.0$  Hz), 7.79 (1H, ddd,  $J = 1.2, 7.2, 8.4$  Hz), 8.02 (1H, d,  $J = 8.4$  Hz), 8.55 (1H, dd,  $J = 0.8, 8.0$  Hz);  $^{13}\text{C}$  NMR (100 MHz,  $\text{CDCl}_3$ )  $\delta$  49.2, 102.9, 115.0 (d,  $J = 21.4$  Hz), 125.5, 126.6, 127.8, 128.4, 128.5, 128.7 (d,  $J = 8.0$  Hz), 129.3, 129.5, 132.9 (d,  $J = 3.1$  Hz), 133.3, 135.51, 135.53, 141.9, 161.9 (d,  $J = 244.2$  Hz), 162.1; ESIHRMS: Found:  $m/z$  408.0403. Calcd for  $\text{C}_{22}\text{H}_{16}\text{NOF}^{79}\text{Br}$ :  $(\text{M}+\text{H})^+$  408.0399.

#### 4-Bromo-2-phenethyl-3-phenylisoquinolin-1(2H)-one (3ae)

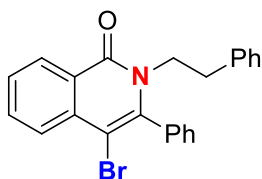

White solid; mp. 121–123  $^{\circ}\text{C}$ ; IR (neat) 754, 1223, 1337, 1508, 1584, 1609, 1651  $\text{cm}^{-1}$ ;  $^1\text{H}$  NMR (400 MHz,  $\text{CDCl}_3$ )  $\delta$  2.83–2.90 (2H, m), 3.95–4.03 (2H, m), 6.86 (2H, d,  $J = 6.4$  Hz), 7.13–7.20 (3H, m), 7.27–7.32 (2H, m), 7.53–7.57 (3H, m), 7.60 (1H, dd,  $J = 7.2, 7.6$  Hz), 7.78 (1H, dd,  $J = 7.6, 8.0$  Hz), 8.00 (1H, d,  $J = 8.4$  Hz), 8.54 (1H, d,  $J = 8.0$  Hz);  $^{13}\text{C}$  NMR (100 MHz,  $\text{CDCl}_3$ )  $\delta$  34.7, 49.1, 102.4, 125.6, 126.4, 126.5, 127.7, 128.1, 128.4, 128.7, 128.8, 129.3, 129.4, 133.2, 135.4, 136.0, 138.1, 142.0, 161.7; ESIHRMS: Found:  $m/z$  404.0649. Calcd for  $\text{C}_{23}\text{H}_{19}\text{NO}^{79}\text{Br}$ :  $(\text{M}+\text{H})^+$  404.0650.

#### 4-Bromo-2-(2,2-diphenylethyl)-3-phenylisoquinolin-1(2H)-one (3af)

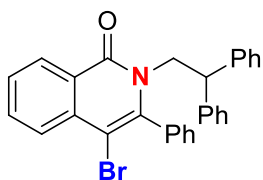

Yellow solid; mp. 159–161 °C; IR (neat) 698, 756, 1508, 1636, 1645, 1653  $\text{cm}^{-1}$ ;  $^1\text{H}$  NMR (400 MHz,  $\text{CDCl}_3$ )  $\delta$  4.52 (2H, brs), 4.60 (1H, t,  $J = 7.2$  Hz), 6.72 (2H, brs), 6.90–6.97 (4H, m), 7.13–7.20 (6H, m), 7.36 (2H, dd,  $J = 7.2, 8.0$  Hz), 7.44 (1H, tt,  $J = 1.2, 7.6$  Hz), 7.57 (1H, ddd,  $J = 1.2, 6.8, 8.0$  Hz), 7.75 (1H, ddd,  $J = 1.2, 7.2, 8.4$  Hz), 7.95 (1H, d,  $J = 8.0$  Hz), 8.50 (1H, dd,  $J = 0.8, 8.0$  Hz);  $^{13}\text{C}$  NMR (100 MHz,  $\text{CDCl}_3$ )  $\delta$  48.0, 52.0, 102.6, 125.6, 126.5, 126.6, 127.6, 128.2, 128.35, 128.43, 128.5, 129.1, 129.8, 133.1, 135.4, 135.6, 141.2, 142.3, 162.2; ESIHRMS: Found:  $m/z$  480.0963. Calcd for  $\text{C}_{29}\text{H}_{23}\text{NO}$   $^{79}\text{Br}$ : (M+H) $^+$  480.0963.

#### 4-Bromo-2-pentyl-3-phenylisoquinolin-1(2H)-one (3ag)

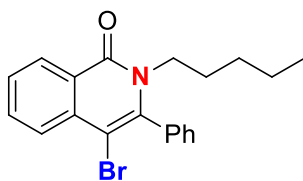

Yellow oil; IR (neat) 762, 1092, 1339, 1474, 1582, 1647, 2930, 2955  $\text{cm}^{-1}$ ;  $^1\text{H}$  NMR (400 MHz,  $\text{CDCl}_3$ )  $\delta$  0.77 (3H, t,  $J = 6.8$  Hz), 1.02–1.17 (4H, m), 1.56 (2H, tt,  $J = 7.2, 8.0$  Hz), 3.79 (2H, t,  $J = 8.0$  Hz), 7.33–7.37 (2H, m), 7.50–7.56 (3H, m), 7.57 (1H, ddd,  $J = 0.8, 7.2, 8.0$  Hz), 7.75 (1H, ddd,  $J = 1.6, 7.2, 8.4$  Hz), 7.98 (1H, d,  $J = 8.4$  Hz), 8.50 (1H, dd,  $J = 0.8, 8.0$  Hz);  $^{13}\text{C}$  NMR (100 MHz,  $\text{CDCl}_3$ )  $\delta$  13.8, 21.9, 28.3, 28.8, 47.4, 102.3, 125.7, 126.4, 127.5, 128.2, 128.7, 129.25, 129.28, 133.0, 135.4, 136.2, 142.2, 161.6; ESIHRMS: Found:  $m/z$  370.0814. Calcd for  $\text{C}_{20}\text{H}_{21}\text{NO}$   $^{79}\text{Br}$ : (M+H) $^+$  370.0807.

#### 4-Bromo-2-(2-(cyclohex-1-en-1-yl)ethyl)-3-phenylisoquinolin-1(2H)-one (3ah)

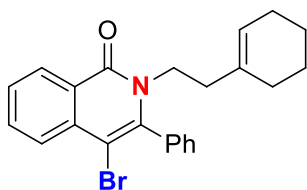

White solid; mp. 107–109 °C; IR (neat) 752, 1578, 1609, 1636, 1647, 2859, 2924  $\text{cm}^{-1}$ ;  $^1\text{H}$  NMR (400 MHz,  $\text{CDCl}_3$ )  $\delta$  1.40–1.52 (4H, m), 1.66 (2H, brs), 1.85 (2H, brs), 2.15 (2H, t,  $J = 8.0$  Hz), 3.86 (2H, t,  $J = 8.0$  Hz), 5.21 (1H, brs), 7.34–7.38 (2H, m), 7.51–7.58 (4H, m), 7.74 (1H, ddd,  $J = 1.2, 7.2, 8.4$  Hz), 7.97 (1H, d,  $J = 8.0$  Hz), 8.49 (1H, dd,  $J = 0.8, 8.0$  Hz);  $^{13}\text{C}$  NMR (100 MHz,  $\text{CDCl}_3$ )  $\delta$  22.1, 22.7, 25.1, 27.8, 36.9, 46.5, 102.3, 123.4, 125.6, 126.4, 127.5, 128.1, 128.7, 129.27, 129.34, 133.0, 134.1, 135.3, 136.0, 142.0, 161.6; ESIHRMS: Found:  $m/z$  408.0964. Calcd for  $\text{C}_{23}\text{H}_{23}\text{NO}$   $^{79}\text{Br}$ : (M+H) $^+$  408.0963.

#### 4-Bromo-2-(cyclohexylmethyl)-3-phenylisoquinolin-1(2H)-one (3ai)

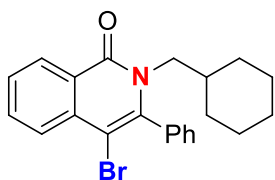

Mixture Rotational isomer (1.00 : 0.22) at room temperature; White solid; mp. 140–145 °C; IR (neat) 1335, 1506, 1578, 1645, 1717, 2849, 2926  $\text{cm}^{-1}$ ;  $^1\text{H}$  NMR (400 MHz,  $\text{CDCl}_3$ , the major isomer's spectra was shown)  $\delta$  0.73-0.84 (2H, m), 1.01-1.12 (3H, m), 1.37-1.43 (2H, m), 1.52-1.70 (4H, m), 3.78 (2H, brs), 7.30-7.36 (2H, m), 7.48-7.55 (3H, m), 7.57 (1H, ddd,  $J = 1.2, 6.8, 8.0$  Hz), 7.75 (1H, ddd,  $J = 1.6, 7.2, 8.4$  Hz), 7.99 (1H, d,  $J = 8.0$  Hz), 8.50 (1H, dd,  $J = 0.8, 8.0$  Hz);  $^{13}\text{C}$  NMR (100 MHz,  $\text{CDCl}_3$ , the major isomer's spectra was shown)  $\delta$  25.8, 26.1, 30.7, 37.5, 52.6, 102.6, 125.6, 126.4, 127.5, 128.3, 128.5, 129.1, 129.9, 133.0, 135.4, 136.0, 142.4, 162.1; ESIHRMS: Found:  $m/z$  396.0956. Calcd for  $\text{C}_{22}\text{H}_{23}\text{NO}^{79}\text{Br}$ :  $(\text{M}+\text{H})^+$  396.0963.

#### 4-Bromo-2-(cyclopropylmethyl)-3-phenylisoquinolin-1(2H)-one (3aj)

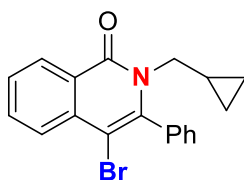

Orange solid; mp. 102–104 °C; IR (neat) 694, 764, 1474, 1607, 1645, 2851, 2924  $\text{cm}^{-1}$ ;  $^1\text{H}$  NMR (400 MHz,  $\text{CDCl}_3$ )  $\delta$  0.16-0.22 (2H, m), 0.33-0.38 (2H, m), 0.92-1.03 (1H, m), 3.82 (2H, d,  $J = 6.8$  Hz), 7.33-7.40 (2H, m), 7.48-7.56 (3H, m), 7.55 (1H, t,  $J = 7.2$  Hz), 7.74 (1H, ddd,  $J = 1.2, 7.2, 8.4$  Hz), 7.97 (1H, d,  $J = 8.0$  Hz), 8.50 (1H, dd,  $J = 0.8, 8.0$  Hz);  $^{13}\text{C}$  NMR (100 MHz,  $\text{CDCl}_3$ )  $\delta$  4.2, 10.7, 50.8, 102.4, 125.7, 126.4, 127.5, 128.2, 128.6, 129.2, 129.7, 133.0, 135.4, 136.2, 142.0, 162.1; ESIHRMS: Found:  $m/z$  354.0498. Calcd for  $\text{C}_{19}\text{H}_{17}\text{NO}^{79}\text{Br}$ :  $(\text{M}+\text{H})^+$  354.0494.

#### 4-Bromo-2-(2-methoxyethyl)-3-phenylisoquinolin-1(2H)-one (3ak)

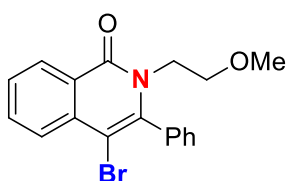

Yellow oil; IR (neat) 692, 760, 1103, 1115, 1580, 1647, 3003  $\text{cm}^{-1}$ ;  $^1\text{H}$  NMR (400 MHz,  $\text{CDCl}_3$ )  $\delta$  3.18 (3H, s), 3.54 (2H, t,  $J = 6.0$  Hz), 4.06 (2H, t,  $J = 6.0$  Hz), 7.32-7.37 (2H, m), 7.50-7.55 (3H, m), 7.57 (1H, ddd,  $J = 1.2, 7.2, 8.0$  Hz), 7.77 (1H, ddd,  $J = 1.2, 7.2, 8.0$  Hz), 7.99 (1H, d,  $J = 8.0$  Hz), 8.49 (1H, dd,  $J = 0.8, 8.0$  Hz);  $^{13}\text{C}$  NMR (100 MHz,  $\text{CDCl}_3$ )  $\delta$  46.4, 58.7, 69.4, 102.6, 125.5, 126.5, 127.6, 128.1, 128.7, 129.3, 129.7, 133.2, 135.6, 136.1, 142.4, 161.9; ESIHRMS: Found:  $m/z$  358.0445. Calcd for  $\text{C}_{18}\text{H}_{17}\text{NO}_2^{79}\text{Br}$ :  $(\text{M}+\text{H})^+$  358.0443.

#### 4-Bromo-2-methyl-3-phenylisoquinolin-1(2H)-one (3al)

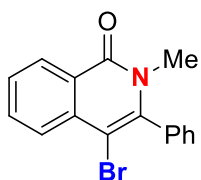

White solid; mp. 132–134 °C; IR (neat) 745, 756, 1117, 1339, 1474, 1636, 1645  $\text{cm}^{-1}$ ;  $^1\text{H}$  NMR (400 MHz,  $\text{CDCl}_3$ )  $\delta$  3.32 (3H, s), 7.31–7.35 (2H, m), 7.50–7.59 (4H, m), 7.75 (1H, ddd,  $J = 1.2, 7.2, 8.4$  Hz), 7.98 (1H, d,  $J = 8.4$  Hz), 8.50 (1H, dd,  $J = 0.8, 8.0$  Hz);  $^{13}\text{C}$  NMR (100 MHz,  $\text{CDCl}_3$ )  $\delta$  35.1, 101.9, 125.3, 126.4, 127.6, 128.1, 128.98, 129.03, 129.3, 133.0, 135.4, 136.4, 142.2, 162.2; ESIHRMS: Found:  $m/z$  314.0178. Calcd for  $\text{C}_{16}\text{H}_{13}\text{NO}^{79}\text{Br}$ :  $(\text{M}+\text{H})^+$  314.0181.

### 2-Methyl-3-phenylisoquinolin-1(2H)-one (4a)<sup>13</sup>

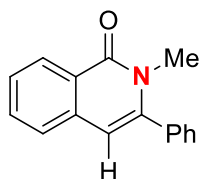

White solid;  $^1\text{H}$  NMR (400 MHz,  $\text{CDCl}_3$ )  $\delta$  3.43 (3H, s), 6.46 (1H, s), 7.39–7.43 (2H, m), 7.45–7.51 (6H, m), 7.63 (1H, dd,  $J = 7.2, 7.6$  Hz), 8.46 (1H, d,  $J = 8.0$  Hz);  $^{13}\text{C}$  NMR (100 MHz,  $\text{CDCl}_3$ )  $\delta$  34.1, 107.5, 124.9, 125.8, 126.6, 127.8, 128.6, 128.7, 128.9, 132.2, 136.2, 136.3, 143.9, 163.3.

### –Table 3–

#### 2-Benzyl-4-bromo-3-(4-methoxyphenyl)isoquinolin-1(2H)-one (3ba)

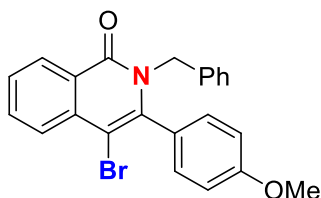

Sticky yellow oil; IR (neat) 750, 1032, 1173, 1248, 1508, 1609, 1645  $\text{cm}^{-1}$ ;  $^1\text{H}$  NMR (400 MHz,  $\text{CDCl}_3$ )  $\delta$  3.85 (3H, s), 5.18 (2H, brs), 6.84–6.90 (4H, m), 6.99 (2H, d,  $J = 8.4$  Hz), 7.15–7.20 (3H, m), 7.59 (1H, ddd,  $J = 1.2, 7.2, 8.0$  Hz), 7.78 (1H, ddd,  $J = 1.2, 7.2, 8.0$  Hz), 8.01 (1H, d,  $J = 8.0$  Hz), 8.55 (1H, dd,  $J = 0.8, 8.0$  Hz);  $^{13}\text{C}$  NMR (100 MHz,  $\text{CDCl}_3$ )  $\delta$  50.0, 55.3, 103.5, 113.8, 125.5, 126.6, 126.7, 127.0, 127.7, 128.1, 128.2, 128.6, 130.8, 133.3, 135.6, 137.3, 142.2, 160.0, 162.3; ESIHRMS: Found:  $m/z$  420.0605. Calcd for  $\text{C}_{23}\text{H}_{19}\text{NO}_2^{79}\text{Br}$ :  $(\text{M}+\text{H})^+$  420.0599.

#### 2-Benzyl-4-bromo-3-(4-methylphenyl)isoquinolin-1(2H)-one (3ca)

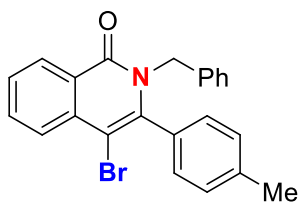

<sup>13</sup> A. Couture, H. Cornet, P. Grandclaudon, *J. Organomet. Chem.* **1992**, *440*, 7.

Sticky yellow oil; IR (neat) 1456, 1474, 1508, 1582, 1607, 1647, 3010  $\text{cm}^{-1}$ ;  $^1\text{H}$  NMR (400 MHz,  $\text{CDCl}_3$ )  $\delta$  2.40 (3H, s), 5.16 (2H, brs), 6.84-6.89 (2H, m), 6.97 (2H, d,  $J = 8.0$  Hz), 7.14-7.19 (3H, m), 7.56 (1H, ddd,  $J = 1.2, 7.2, 8.0$  Hz), 7.77 (1H, ddd,  $J = 1.2, 7.2, 8.4$  Hz), 8.01 (1H, d,  $J = 8.0$  Hz), 8.54 (1H, dd,  $J = 0.8, 8.0$  Hz);  $^{13}\text{C}$  NMR (100 MHz,  $\text{CDCl}_3$ )  $\delta$  21.4, 50.0, 102.9, 125.5, 126.5, 126.7, 127.0, 127.6, 128.2, 128.5, 129.1, 129.3, 132.8, 133.2, 135.6, 137.2, 139.2, 142.4, 162.2; ESIHRMS: Found:  $m/z$  404.0656. Calcd for  $\text{C}_{23}\text{H}_{19}\text{NO}$   $^{79}\text{Br}$ : (M+H) $^+$  404.0650.

### 2-Benzyl-4-bromo-3-(4-fluorophenyl)isoquinolin-1(2H)-one (3da)

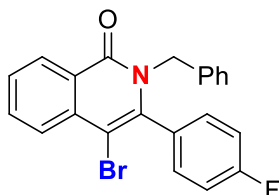

White solid; mp. 131–133  $^{\circ}\text{C}$ ; IR (neat) 1223, 1238, 1373, 1506, 1636, 1717, 1734  $\text{cm}^{-1}$ ;  $^1\text{H}$  NMR (400 MHz,  $\text{CDCl}_3$ )  $\delta$  5.17 (2H, brs), 6.80-6.85 (2H, m), 7.00-7.08 (4H, m), 7.16-7.20 (3H, m), 7.61 (1H, ddd,  $J = 1.2, 7.2, 8.0$  Hz), 7.80 (1H, ddd,  $J = 1.2, 7.2, 8.4$  Hz), 8.01 (1H, d,  $J = 8.0$  Hz), 8.56 (1H, dd,  $J = 0.8, 8.0$  Hz);  $^{13}\text{C}$  NMR (100 MHz,  $\text{CDCl}_3$ )  $\delta$  49.9, 103.3, 115.6 (d,  $J = 21.7$  Hz), 125.6, 126.59, 126.62, 127.2, 127.9, 128.3, 128.6, 131.5 (d,  $J = 8.4$  Hz), 131.6 (d,  $J = 3.8$  Hz), 133.4, 135.4, 137.0, 141.2, 162.1, 162.9 (d,  $J = 248.6$  Hz); ESIHRMS: Found:  $m/z$  408.0392. Calcd for  $\text{C}_{22}\text{H}_{16}\text{NOF}$   $^{79}\text{Br}$ : (M+H) $^+$  408.0399.

### Ethyl 4-(2-benzyl-4-bromo-1-oxo-1,2-dihydroisoquinolin-3-yl)benzoate (3ea)

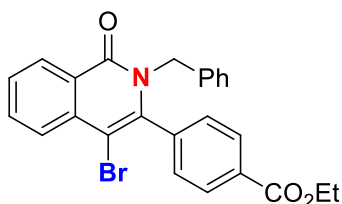

Yellow oil; IR (neat) 760, 1022, 1099, 1271, 1506, 1653, 1717  $\text{cm}^{-1}$ ;  $^1\text{H}$  NMR (400 MHz,  $\text{CDCl}_3$ )  $\delta$  1.42 (3H, t,  $J = 7.2$  Hz), 4.42 (2H, q,  $J = 7.2$  Hz), 5.15 (2H, brs), 6.78-6.83 (2H, m), 7.12-7.20 (5H, m), 7.62 (1H, ddd,  $J = 0.8, 7.2, 8.0$  Hz), 7.80 (1H, ddd,  $J = 1.2, 7.2, 8.4$  Hz), 8.01 (1H, d,  $J = 8.0$  Hz), 8.04 (2H, d,  $J = 8.4$  Hz), 8.57 (1H, dd,  $J = 0.8, 8.0$  Hz);  $^{13}\text{C}$  NMR (100 MHz,  $\text{CDCl}_3$ )  $\delta$  14.3, 49.9, 61.3, 102.6, 125.6, 126.6 (overlapped), 127.2, 128.1, 128.4, 128.6, 129.6, 129.7, 131.2, 133.4, 135.4, 136.8, 139.7, 141.2, 162.1, 165.8; ESIHRMS: Found:  $m/z$  462.0703. Calcd for  $\text{C}_{25}\text{H}_{21}\text{NO}_3$   $^{79}\text{Br}$ : (M+H) $^+$  462.0705.

### 2-Benzyl-4-bromo-3-(4-trifluoromethylphenyl)isoquinolin-1(2H)-one (3fa)

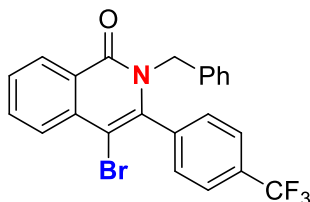

Yellow oil; IR (neat) 760, 1067, 1128, 1167, 1321, 1647  $\text{cm}^{-1}$ ;  $^1\text{H}$  NMR (400 MHz,  $\text{CDCl}_3$ )  $\delta$  5.14 (2H, brs), 6.75-6.81 (2H, m), 7.13-7.20 (5H, m), 7.59-7.66 (3H, m), 7.80 (1H, ddd,  $J = 1.2, 7.2, 8.4$  Hz), 8.01 (1H, d,  $J = 8.0$  Hz), 8.57 (1H, dd,  $J = 0.8, 8.0$  Hz);  $^{13}\text{C}$  NMR (100 MHz,  $\text{CDCl}_3$ )  $\delta$  49.9,

102.8, 123.7 (q,  $J = 270.6$  Hz), 125.4 (q,  $J = 3.7$  Hz), 125.7, 126.56, 126.63, 127.3, 128.2, 128.4, 128.7, 130.1, 131.3 (q,  $J = 32.6$  Hz), 133.5, 135.3, 136.8, 139.0, 140.6, 162.1; ESIHRMS: Found:  $m/z$  458.0359. Calcd for  $C_{23}H_{16}NOF_3$   $^{79}Br$ : (M+H) $^+$  458.0367.

### 2-Benzyl-4-bromo-3-(3-methoxyphenyl)isoquinolin-1(2H)-one (3ga)

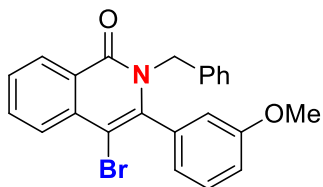

Sticky oil; IR (neat) 1040, 1215, 1261, 1456, 1489, 1578, 1651  $cm^{-1}$ ;  $^1H$  NMR (400 MHz,  $CDCl_3$ )  $\delta$  3.56 (3H, s), 4.94 (1H, brd,  $J = 14.8$  Hz), 5.38 (1H, brd,  $J = 15.2$  Hz), 6.46 (1H, s), 6.73 (1H, d,  $J = 7.6$  Hz), 6.83-6.90 (2H, m), 6.96 (1H, ddd,  $J = 0.8, 2.4, 8.4$  Hz), 7.16-7.21 (3H, m), 7.31 (1H, t,  $J = 8.0$  Hz), 7.60 (1H, ddd,  $J = 1.2, 7.6, 8.4$  Hz), 7.79 (1H, ddd,  $J = 1.2, 7.2, 8.4$  Hz), 8.02 (1H, d,  $J = 8.0$  Hz), 8.56 (1H, dd,  $J = 1.2, 8.0$  Hz);  $^{13}C$  NMR (100 MHz,  $CDCl_3$ )  $\delta$  50.0, 55.0, 102.6, 114.3, 115.7, 121.5, 125.5, 126.5, 126.7, 127.0, 127.7, 128.3, 128.5, 129.6, 133.3, 135.6, 136.6, 137.4, 142.0, 159.2, 162.2; ESIHRMS: Found:  $m/z$  420.0602. Calcd for  $C_{23}H_{19}NO_2$   $^{79}Br$ : (M+H) $^+$  420.0599.

### 2-Benzyl-4-bromo-3-(2-methoxyphenyl)isoquinolin-1(2H)-one (3ha)

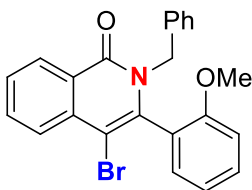

Yellow solid; mp. 108–110  $^{\circ}C$ ; IR (neat) 758, 1256, 1495, 1578, 1599, 1636, 2965  $cm^{-1}$ ;  $^1H$  NMR (400 MHz,  $CDCl_3$ )  $\delta$  3.55 (3H, s), 4.93 (1H, brd,  $J = 15.2$  Hz), 5.33 (1H, brd,  $J = 15.2$  Hz), 6.82-6.88 (2H, m), 6.88-6.95 (3H, m), 7.11-7.16 (3H, m), 7.40-7.46 (1H, m), 7.58 (1H, ddd,  $J = 1.2, 7.6, 8.4$  Hz), 7.77 (1H, ddd,  $J = 1.2, 7.2, 8.4$  Hz), 8.00 (1H, d,  $J = 8.0$  Hz), 8.56 (1H, dd,  $J = 1.2, 8.0$  Hz);  $^{13}C$  NMR (100 MHz,  $CDCl_3$ )  $\delta$  49.8, 55.2, 103.3, 110.9, 120.4, 124.5, 125.6, 126.4, 126.9, 127.1, 127.5, 128.0, 128.5, 131.1, 131.3, 133.1, 135.7, 137.2, 139.7, 156.5, 162.4; ESIHRMS: Found:  $m/z$  420.0598. Calcd for  $C_{23}H_{19}NO_2$   $^{79}Br$ : (M+H) $^+$  420.0599.

### 2-Benzyl-4-bromo-3-(2-bromophenyl)isoquinolin-1(2H)-one (3ia)

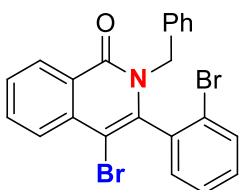

Yellow oil; IR (neat) 692, 752, 1026, 1327, 1472, 1607, 1647  $cm^{-1}$ ;  $^1H$  NMR (400 MHz,  $CDCl_3$ )  $\delta$  4.49 (1H, d,  $J = 15.2$  Hz), 5.80 (1H, d,  $J = 15.6$  Hz), 6.80-6.87 (3H, m), 7.11-7.20 (4H, m), 7.30 (1H, dt,  $J = 1.6, 8.0$  Hz), 7.62 (1H, ddd,  $J = 1.2, 7.6, 8.4$  Hz), 7.69 (1H, dd,  $J = 1.2, 8.0$  Hz), 7.79 (1H, ddd,  $J = 1.2, 7.2, 8.4$  Hz), 8.01 (1H, d,  $J = 8.0$  Hz), 8.59 (1H, dd,  $J = 1.2, 8.0$  Hz);  $^{13}C$  NMR (100 MHz,  $CDCl_3$ )  $\delta$  49.7, 103.4, 123.9, 125.8, 126.6, 127.0, 127.18, 127.22, 128.1, 128.2, 128.6,

130.9, 132.1, 132.7, 133.3, 135.4, 136.4, 136.9, 140.8, 162.2; ESIHRMS: Found:  $m/z$  469.9583. Calcd for  $C_{22}H_{16}NO$   $^{79}Br$   $^{81}Br$ :  $(M+H)^+$  469.9578.

### 2-Benzyl-4-bromo-3-(2-naphthyl)isoquinolin-1(2H)-one (3ja)

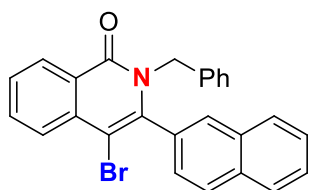

Yellow oil; IR (neat) 748, 1337, 1506, 1582, 1647  $cm^{-1}$ ;  $^1H$  NMR (400 MHz,  $CDCl_3$ )  $\delta$  5.02 (1H, brd,  $J = 15.2$  Hz), 5.33 (1H, brd,  $J = 15.2$  Hz), 6.77 (2H, d,  $J = 6.8$  Hz), 7.07-7.20 (4H, m), 7.48-7.59 (3H, m), 7.62 (1H, ddd,  $J = 0.8, 7.2, 8.0$  Hz), 7.68 (1H, d,  $J = 8.0$  Hz), 7.80 (1H, ddd,  $J = 1.2, 7.2, 8.4$  Hz), 7.85 (1H, d,  $J = 8.4$  Hz), 7.89 (1H, d,  $J = 8.0$  Hz), 8.03 (1H, d,  $J = 8.4$  Hz), 8.59 (1H, dd,  $J = 0.8, 8.0$  Hz);  $^{13}C$  NMR (100 MHz,  $CDCl_3$ )  $\delta$  50.1, 103.1, 125.6, 126.4, 126.57, 126.62, 126.8, 127.07, 127.13, 127.76, 127.81, 128.22, 128.24, 128.4, 128.6, 129.4, 132.6, 132.8, 133.1, 133.3, 135.6, 137.2, 142.1, 162.2; ESIHRMS: Found:  $m/z$  440.0654. Calcd for  $C_{26}H_{19}NO$   $^{79}Br$ :  $(M+H)^+$  440.0650.

### 2-Benzyl-4-bromo-3-pentylisoquinolin-1(2H)-one (3ka)

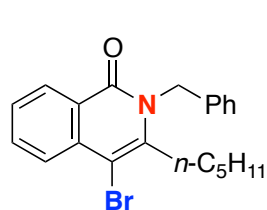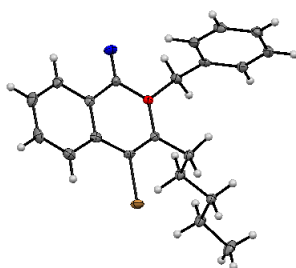

X-ray of **3ka**

Colorless crystal; mp. 109–111  $^{\circ}C$ ; IR (neat) 764, 1456, 1506, 1558, 1645, 1717  $cm^{-1}$ ;  $^1H$  NMR (400 MHz,  $CDCl_3$ )  $\delta$  0.91 (3H, t,  $J = 6.8$  Hz), 1.30-1.42 (4H, m), 1.56-1.64 (2H, m), 2.90 (2H, t,  $J = 8.0$  Hz), 5.50 (2H, brs), 7.14 (2H, d,  $J = 7.2$  Hz), 7.25 (1H, t,  $J = 7.2$  Hz), 7.31 (2H, dd,  $J = 6.8, 7.6$  Hz), 7.51 (1H, ddd,  $J = 1.2, 7.2, 8.0$  Hz), 7.74 (1H, ddd,  $J = 1.2, 7.2, 8.4$  Hz), 7.98 (1H, d,  $J = 8.4$  Hz), 8.46 (1H, dd,  $J = 1.2, 8.0$  Hz);  $^{13}C$  NMR (100 MHz,  $CDCl_3$ )  $\delta$  13.9, 22.2, 27.9, 31.7, 33.6, 48.1, 102.3, 124.6, 125.9, 126.1, 127.0, 127.3, 128.5, 128.8, 133.2, 135.8, 137.0, 142.4, 162.5; ESIHRMS: Found:  $m/z$  384.0969. Calcd for  $C_{21}H_{23}NO$   $^{79}Br$ :  $(M+H)^+$  384.0963.

### 2-Benzyl-4-bromo-3-cyclohexylisoquinolin-1(2H)-one (3la)

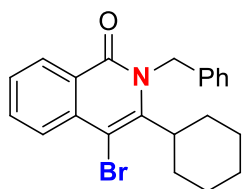

White solid; mp. 126–128  $^{\circ}C$ ; IR (neat) 1339, 1456, 1506, 1576, 1607, 1636, 1653  $cm^{-1}$ ;  $^1H$  NMR (400 MHz,  $CDCl_3$ )  $\delta$  0.92-1.50 (4H, m), 1.55-1.90 (4H, m), 2.53 (2H, dtd,  $J = 3.6, 12.4, 12.8$  Hz), 3.06 (1H, tt,  $J = 3.2, 12.0$  Hz), 5.57 (2H, brs), 7.19 (2H, d,  $J = 7.2$  Hz), 7.23-7.28 (1H, m), 7.32 (2H, dd,  $J = 7.2, 7.6$  Hz), 7.51 (1H, ddd,  $J = 1.2, 7.2, 8.0$  Hz), 7.72 (1H, ddd,  $J = 1.2, 7.2, 8.4$  Hz), 8.06



(1H, d,  $J = 8.0$  Hz), 8.47 (1H, dd,  $J = 0.8, 8.0$  Hz);  $^{13}\text{C}$  NMR (100 MHz,  $\text{CDCl}_3$ )  $\delta$  25.4, 26.8, 27.9, 43.1, 48.6, 101.9, 124.6, 125.8, 126.2, 127.2, 127.3, 128.4, 128.7, 133.0, 136.2, 137.6, 145.2, 163.0; ESIHRMS: Found:  $m/z$  396.0961. Calcd for  $\text{C}_{22}\text{H}_{23}\text{NO}$   $^{79}\text{Br}$ : (M+H) $^+$  396.0963.

### 2-Benzyl-4-bromo-3-cyclopropylisoquinolin-1(2H)-one (3ma)

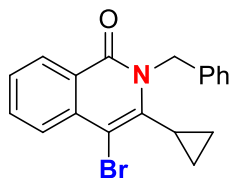

White solid; mp. 120–122 °C; IR (neat) 696, 764, 1456, 1506, 1576, 1645, 1717  $\text{cm}^{-1}$ ;  $^1\text{H}$  NMR (400 MHz,  $\text{CDCl}_3$ )  $\delta$  0.95-1.00 (2H, m), 1.23-1.29 (2H, m), 1.65 (1H, tt,  $J = 6.0, 8.4$  Hz), 5.81 (2H, brs), 7.14 (2H, d,  $J = 7.2$  Hz), 7.20-7.30 (3H, m), 7.52 (1H, ddd,  $J = 0.8, 7.2, 8.0$  Hz), 7.73 (1H, ddd,  $J = 1.2, 7.2, 8.4$  Hz), 8.02 (1H, d,  $J = 8.4$  Hz), 8.46 (1H, dd,  $J = 0.8, 8.0$  Hz);  $^{13}\text{C}$  NMR (100 MHz,  $\text{CDCl}_3$ )  $\delta$  12.1, 15.3, 47.5, 105.5, 125.1, 126.0, 126.3, 127.0, 127.3, 128.3, 128.6, 133.0, 135.8, 137.6, 141.3, 162.5; ESIHRMS: Found:  $m/z$  354.0497. Calcd for  $\text{C}_{19}\text{H}_{17}\text{NO}$   $^{79}\text{Br}$ : (M+H) $^+$  354.0494.

### 2-Benzyl-4-bromo-5-methyl-3-phenylisoquinolin-1(2H)-one (3na)

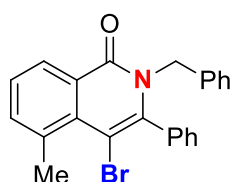

Yellow solid; mp. 141–143 °C; IR (neat) 694, 760, 1327, 1456, 1506, 1578, 1639  $\text{cm}^{-1}$ ;  $^1\text{H}$  NMR (400 MHz,  $\text{CDCl}_3$ )  $\delta$  2.96 (3H, s), 5.11 (2H, brs), 6.78-6.84 (2H, m), 7.04 (2H, d,  $J = 7.2$  Hz), 7.13-7.18 (3H, m), 7.32-7.42 (3H, m), 7.45 (1H, dd,  $J = 7.6, 8.0$  Hz), 7.57 (1H, d,  $J = 7.2$  Hz), 8.54 (1H, d,  $J = 8.0$  Hz);  $^{13}\text{C}$  NMR (100 MHz,  $\text{CDCl}_3$ )  $\delta$  25.6, 50.2, 100.1, 126.8, 127.0, 127.30, 127.33, 127.6, 128.2, 128.5, 128.9, 129.5, 134.2, 135.3, 136.7, 137.1, 137.5, 142.7, 162.3; ESIHRMS: Found:  $m/z$  404.0647. Calcd for  $\text{C}_{23}\text{H}_{19}\text{NO}$   $^{79}\text{Br}$ : (M+H) $^+$  404.0650.

### 6-Benzyl-8-bromo-7-phenyl-[1,3]dioxolo[4,5-g]isoquinolin-5(6H)-one (3oa)

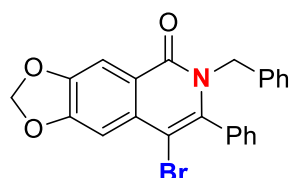

Sticky yellow oil; IR (neat) 696, 1036, 1231, 1406, 1472, 1568, 1645  $\text{cm}^{-1}$ ;  $^1\text{H}$  NMR (400 MHz,  $\text{CDCl}_3$ )  $\delta$  5.13 (2H, brs), 6.14 (2H, s), 6.79-6.85 (2H, m), 7.05 (2H, d,  $J = 6.8$  Hz), 7.14-7.19 (3H, m), 7.35 (2H, dd,  $J = 6.8, 8.0$  Hz), 7.42 (1H, s), 7.42 (1H, tt,  $J = 1.2, 8.0$  Hz), 7.90 (1H, s);  $^{13}\text{C}$  NMR (100 MHz,  $\text{CDCl}_3$ )  $\delta$  50.0, 102.1, 102.4, 105.1, 106.3, 121.2, 126.7, 127.0, 128.2, 128.4, 129.1, 129.5, 133.2, 135.8, 137.2, 141.0, 148.4, 152.8, 161.3; ESIHRMS: Found:  $m/z$  434.0389. Calcd for  $\text{C}_{23}\text{H}_{17}\text{NO}_3$   $^{79}\text{Br}$ : (M+H) $^+$  434.0392.

### 2-Benzyl-4-bromo-7-methoxy-3-phenylisoquinolin-1(2H)-one (3pa)

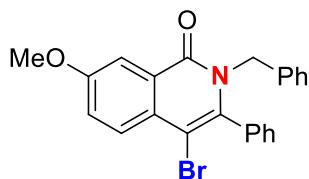

Yellow solid; mp. 161–163 °C; IR (neat) 698, 939, 1038, 1406, 1474, 1645  $\text{cm}^{-1}$ ;  $^1\text{H}$  NMR (400 MHz,  $\text{CDCl}_3$ )  $\delta$  3.97 (3H, s), 5.16 (2H, brs), 6.80–6.87 (2H, m), 7.07 (2H, d,  $J = 7.2$  Hz), 7.14–7.19 (3H, m), 7.32–7.39 (3H, m), 7.42 (1H, t,  $J = 7.2$  Hz), 7.94 (1H, d,  $J = 9.2$  Hz), 7.96 (1H, d,  $J = 2.4$  Hz);  $^{13}\text{C}$  NMR (100 MHz,  $\text{CDCl}_3$ )  $\delta$  50.1, 55.8, 102.7, 108.4, 123.6, 126.7, 127.0, 128.2, 128.37, 128.40 (overlapped), 129.1, 129.6, 129.8, 135.7, 137.2, 139.7, 159.4, 161.9; ESIHRMS: Found:  $m/z$  420.0599. Calcd for  $\text{C}_{23}\text{H}_{19}\text{NO}_2$   $^{79}\text{Br}$ : (M+H) $^+$  420.0599.

### 2-Benzyl-4-bromo-7-fluoro-3-phenylisoquinolin-1(2H)-one (3qa)

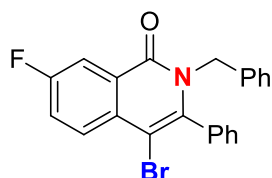

Yellow solid; mp. 104–106 °C; IR (neat) 696, 752, 941, 1341, 1489, 1585, 1647  $\text{cm}^{-1}$ ;  $^1\text{H}$  NMR (400 MHz,  $\text{CDCl}_3$ )  $\delta$  5.15 (2H, brs), 6.79–6.85 (2H, m), 7.06 (2H, d,  $J = 6.8$  Hz), 7.14–7.20 (3H, m), 7.37 (2H, dd,  $J = 7.2, 8.0$  Hz), 7.44 (1H, tt,  $J = 1.2, 7.2$  Hz), 7.51 (1H, ddd,  $J = 2.8, 8.0, 8.8$  Hz), 8.04 (1H, dd,  $J = 4.8, 8.8$  Hz), 8.21 (1H, d,  $J = 1.2, 9.2$  Hz);  $^{13}\text{C}$  NMR (100 MHz,  $\text{CDCl}_3$ )  $\delta$  50.2, 102.1, 113.7 (d,  $J = 23.2$  Hz), 121.8 (d,  $J = 23.4$  Hz), 126.8, 127.1 (d,  $J = 7.8$  Hz), 127.2, 128.3, 128.5, 129.3, 129.4 (d,  $J = 8.2$  Hz), 129.5, 132.2 (d,  $J = 2.2$  Hz), 135.4, 136.9, 141.5 (d,  $J = 2.8$  Hz), 161.4 (d,  $J = 4.2$  Hz), 162.0 (d,  $J = 247.9$  Hz); ESIHRMS: Found:  $m/z$  408.0405. Calcd for  $\text{C}_{22}\text{H}_{16}\text{NOF}$   $^{79}\text{Br}$ : (M+H) $^+$  408.0399.

### 2-benzyl-4-bromo-3-phenylbenzofuro[2,3-c]pyridin-1(2H)-one (3ra)

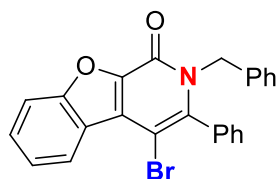

White solid; mp. 182–184 °C; IR (neat) 743, 1038, 1456, 1474, 1647, 1668  $\text{cm}^{-1}$ ;  $^1\text{H}$  NMR (400 MHz,  $\text{CDCl}_3$ )  $\delta$  5.28 (2H, brs), 6.79–6.85 (2H, m), 7.05 (2H, d,  $J = 7.2$  Hz), 7.13–7.19 (3H, m), 7.39 (2H, t,  $J = 7.6$  Hz), 7.42–7.49 (2H, m), 7.62 (1H, ddd,  $J = 1.2, 7.2, 8.4$  Hz), 7.75 (1H, d,  $J = 8.8$  Hz), 8.45 (1H, dd,  $J = 0.4, 8.0$  Hz);  $^{13}\text{C}$  NMR (100 MHz,  $\text{CDCl}_3$ )  $\delta$  50.0, 95.5, 112.8, 123.4, 123.5, 123.6, 127.0, 127.3, 128.29, 128.32, 128.6, 129.3, 129.5, 129.8, 134.4, 136.7, 142.7, 143.3, 154.1, 156.9; ESIHRMS: Found:  $m/z$  430.0437. Calcd for  $\text{C}_{24}\text{H}_{17}\text{NO}_2$   $^{79}\text{Br}$ : (M+H) $^+$  430.0443.

### 6-Benzyl-8-bromo-7-phenyl-1,6-naphthyridin-5(6H)-one (3sa)

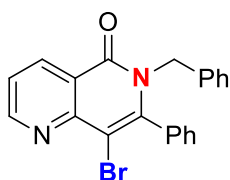

Yellow solid; mp. 138–140 °C; IR (neat) 698, 1435, 1456, 1541, 1558, 1638  $\text{cm}^{-1}$ ;  $^1\text{H}$  NMR (400 MHz,  $\text{CDCl}_3$ )  $\delta$  5.17 (2H, brs), 6.80–6.87 (2H, m), 7.10 (2H, d,  $J = 7.2$  Hz), 7.15–7.21 (3H, m), 7.39 (2H, dd,  $J = 6.8, 7.6$  Hz), 7.46 (1H, tt,  $J = 1.2, 7.2$  Hz), 7.54 (1H, dd,  $J = 4.8, 8.0$  Hz), 8.81 (1H, dd,  $J = 1.6, 8.0$  Hz), 9.09 (1H, dd,  $J = 1.6, 4.8$  Hz);  $^{13}\text{C}$  NMR (100 MHz,  $\text{CDCl}_3$ )  $\delta$  50.0, 104.7, 121.4, 122.6, 126.7, 127.2, 128.3, 128.5, 129.0, 129.4, 135.0, 136.6, 137.1, 146.2, 150.2, 155.1, 162.1; ESIHRMS: Found:  $m/z$  391.0443. Calcd for  $\text{C}_{21}\text{H}_{16}\text{N}_2\text{O}^{79}\text{Br}$ :  $(\text{M}+\text{H})^+$  391.0446.

### 6-Benzyl-7-phenyl-1,6-naphthyridin-5(6H)-one (4sa)

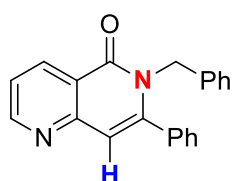

Yellow solid; mp. 113–115 °C; IR (neat) 704, 839, 1358, 1437, 1506, 1558, 1653  $\text{cm}^{-1}$ ;  $^1\text{H}$  NMR (400 MHz,  $\text{CDCl}_3$ )  $\delta$  5.24 (2H, brs), 6.72 (1H, s), 6.87–6.93 (2H, m), 7.15–7.20 (3H, m), 7.23 (2H, d,  $J = 7.2$  Hz), 7.36 (2H, dd,  $J = 7.2, 8.0$  Hz), 7.41–7.46 (2H, m), 8.74 (1H, dd,  $J = 1.2, 8.0$  Hz), 8.93 (1H, dd,  $J = 1.6, 4.8$  Hz);  $^{13}\text{C}$  NMR (100 MHz,  $\text{CDCl}_3$ )  $\delta$  48.6, 109.8, 120.9, 121.7, 126.8, 127.1, 128.3 (overlapped), 128.8, 129.2, 135.2, 136.6, 137.1, 147.8, 152.9, 154.8, 163.1; ESIHRMS: Found:  $m/z$  313.1335. Calcd for  $\text{C}_{21}\text{H}_{17}\text{N}_2\text{O}$ :  $(\text{M}+\text{H})^+$  313.1341.

### 3.2. The reactions with CuCl and CuI

It was found that CuCl and CuI also showed the reactivity in the present reaction conditions, giving 4-chloro- and 4-iodoisoquinolones **3aa'** and **3aa''**, respectively, while lower yields were observed.

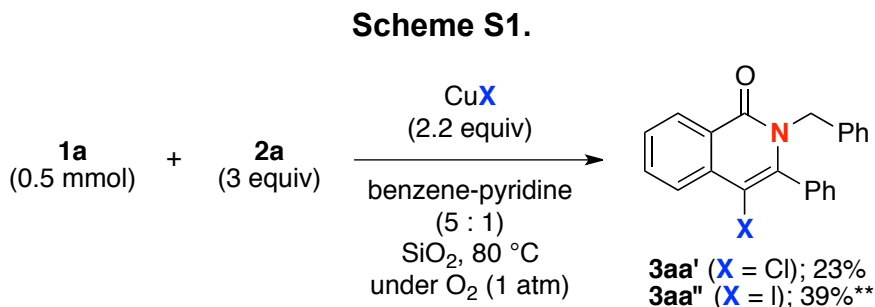

\*\*Pyridine was used as a sole solvent.

### 2-Benzyl-4-chloro-3-phenylisoquinolin-1(2H)-one (3aa')

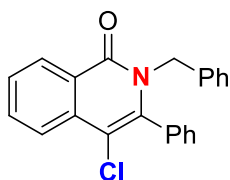

Synthesized from 2.2 equiv of CuCl; Yellow oil; IR (neat) 696, 752, 1477, 1495, 1585, 1611, 1647  $\text{cm}^{-1}$ ;  $^1\text{H}$  NMR (400 MHz,  $\text{CDCl}_3$ )  $\delta$  5.15 (2H, brs), 6.80-6.86 (2H, m), 7.09 (2H, d,  $J = 6.8$  Hz), 7.14-7.18 (3H, m), 7.36 (2H, dd,  $J = 6.8, 7.6$  Hz), 7.43 (1H, t,  $J = 7.6$  Hz), 7.61 (1H, dt,  $J = 0.8, 7.6$  Hz), 7.79 (1H, dt,  $J = 1.2, 7.6$  Hz), 8.00 (1H, d,  $J = 8.0$  Hz), 8.57 (1H, dd,  $J = 0.8, 8.0$  Hz);  $^{13}\text{C}$  NMR (100 MHz,  $\text{CDCl}_3$ )  $\delta$  49.5, 111.8, 123.8, 125.5, 126.8, 127.1, 127.8, 128.3, 128.5, 128.6, 129.2, 129.6, 133.1, 133.6, 134.7, 137.2, 140.5, 162.0; ESIHRMS: Found:  $m/z$  346.1003. Calcd for  $\text{C}_{22}\text{H}_{17}\text{NOCl}$ : (M+H) $^+$  346.0999.

### 2-Benzyl-4-iodo-3-phenylisoquinolin-1(2H)-one (3aa'')

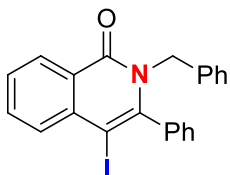

Synthesized from 2.2 equiv of CuI in pyridine (0.1 M); White solid; IR (neat) 696, 762, 1030, 1339, 1587, 1603, 1647  $\text{cm}^{-1}$ ; mp. 86–88  $^{\circ}\text{C}$ ;  $^1\text{H}$  NMR (400 MHz,  $\text{CDCl}_3$ )  $\delta$  5.20 (2H, brs), 6.80-6.86 (2H, m), 7.02 (2H, d,  $J = 7.6$  Hz), 7.14-7.18 (3H, m), 7.35 (2H, dd,  $J = 7.2, 7.6$  Hz), 7.42 (1H, t,  $J = 7.2$  Hz), 7.57 (1H, t,  $J = 7.6$  Hz), 7.75 (1H, t,  $J = 7.6$  Hz), 7.96 (1H, d,  $J = 8.0$  Hz), 8.51 (1H, d,  $J = 8.0$  Hz);  $^{13}\text{C}$  NMR (100 MHz,  $\text{CDCl}_3$ )  $\delta$  50.8, 79.9, 125.2, 126.7, 127.0, 127.8, 128.2, 128.4, 128.6, 129.3, 129.5, 131.7, 133.6, 137.2, 137.4, 139.3, 145.7, 162.5; ESIHRMS: Found:  $m/z$  438.0354. Calcd for  $\text{C}_{22}\text{H}_{17}\text{NOI}$ : (M+H) $^+$  438.0355.

### 3.3. The reactions with $\beta$ -alanine ethyl ester (**2m**) and propargylamine **2n**

The reaction of  $\beta$ -alanine ethyl ester (**2m**) (as a hydrochloride salt) with **1a** under the standard reaction conditions provided 4-bromoisoquinoline **5** and protonated isoquinoline **6** in 42% and 28% yields, respectively, with certain C-N bond cleavage, and no desired 4-bromoisoquinolone was formed at all (Scheme S2). Similarly, 3-phenylprop-2-yn-1-amine (**2n**) also delivered 4-bromoisoquinoline **5** without forming 4-bromoisoquinolone **3**. It is noted that aromatic amines (anilines) did not work at all to provide any cyclized product under the present reaction conditions.

Scheme S2.

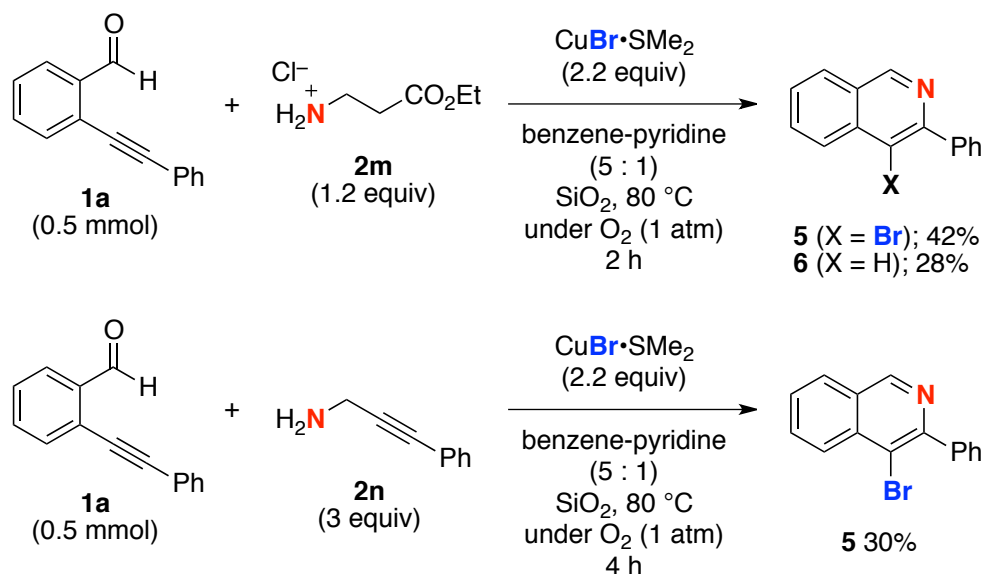

#### 4-Bromo-3-phenylisoquinoline (**5**)<sup>14</sup>

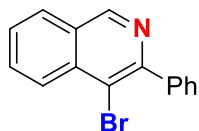

White solid; <sup>1</sup>H NMR (400 MHz, CDCl<sub>3</sub>)  $\delta$  7.41-7.53 (3H, m), 7.66 (1H, ddd,  $J = 0.8, 7.2, 8.0$  Hz), 7.71-7.76 (2H, m), 7.82 (1H, ddd,  $J = 1.2, 6.8, 8.4$  Hz), 7.98 (1H, d,  $J = 8.0$  Hz), 8.31 (1H, dd,  $J = 0.8, 8.8$  Hz), 9.22 (1H, s); <sup>13</sup>C NMR (100 MHz, CDCl<sub>3</sub>)  $\delta$  118.2, 126.9, 127.7, 127.8, 127.9, 128.3, 128.5, 129.8, 131.8, 135.9, 140.7, 151.0, 152.3.

#### 3-Phenylisoquinoline (**6**)<sup>15</sup>

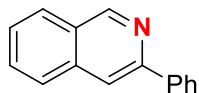

White solid; <sup>1</sup>H NMR (400 MHz, CDCl<sub>3</sub>)  $\delta$  7.41 (1H, tt,  $J = 1.2, 7.6$  Hz), 7.48-7.53 (2H, m), 7.57 (1H, ddd,  $J = 1.2, 6.8, 8.0$  Hz), 7.68 (1H, ddd,  $J = 1.2, 6.8, 8.0$  Hz), 7.86 (1H, d,  $J = 8.0$  Hz), 7.97

<sup>14</sup> H.-P. Zhang, S.-C. Yu, Y. Liang, P. Peng, B.-X. Tang, J.-H. Li, *Synlett* **2011**, 982.

<sup>15</sup> Y.-N. Niu, Z.-Y. Yan, G.-L. Gao, H.-L. Wang, X.-Z. Shu, K.-G. Ji, Y.-M. Liang, *J. Org. Chem.* **2009**, *74*, 2893.

(1H, d,  $J = 8.0$  Hz), 8.06 (1H, s), 8.10-8.15 (2H, m), 9.33 (1H, s);  $^{13}\text{C}$  NMR (100 MHz,  $\text{CDCl}_3$ )  $\delta$  116.5, 126.8, 126.9, 127.0, 127.5, 127.7, 128.4, 128.7, 130.4, 136.5, 139.5, 151.2, 152.3.

#### 4. Control experiments to elucidate the reaction mechanism

To elucidate the reaction mechanism for the formation of 4-bromoisoquinolone derivatives **3**, especially pertaining to how N-C bond forming cyclization as well as formation of C=O and C-Br bonds could occur, several control experiments were conducted (Scheme S3). The reaction of *N*-benzylaldimines **7** under the standard reaction conditions afforded 4-bromoisoquinolone **3aa** (Scheme S3-a), while cyclization of *N*-benzylamide **8** did not proceed at all (Scheme S3-b). With the fact that the reaction of benzaldehyde (**9**) and benzylamine (**2a**) under the present conditions gave only aldimine **10** derived from condensation of **9** and **2a** as well as dimerization of **2a** (Scheme S3-c), it could be expected that the N-C bond forming cyclization onto alkyne might occur prior to the C=O bond formation. Stahl reported a CuBr-catalyzed aerobic bromination of arenes in the presence of LiBr as a stoichiometric bromine atom source, where molecular bromine generated *in situ* underwent an electrophilic bromination.<sup>16</sup> On the contrary, treatment of cyclooctene (**11**) under the present reaction conditions (2.2 equiv of  $\text{CuBr}\cdot\text{SMe}_2$ ,  $\text{SiO}_2$ , in benzene-pyridine under an  $\text{O}_2$  atmosphere) did not afford any electrophilic bromination product (Scheme S3-d). This suggested that molecular bromine (or a precursor of bromonium cation) is not likely involved in the present 4-bromoisoquinolone formation. It is also noted that vinylic C-H bromination of isoquinolone **4aa** did not proceed under the present reaction conditions (Scheme S3-e).

Scheme S3.

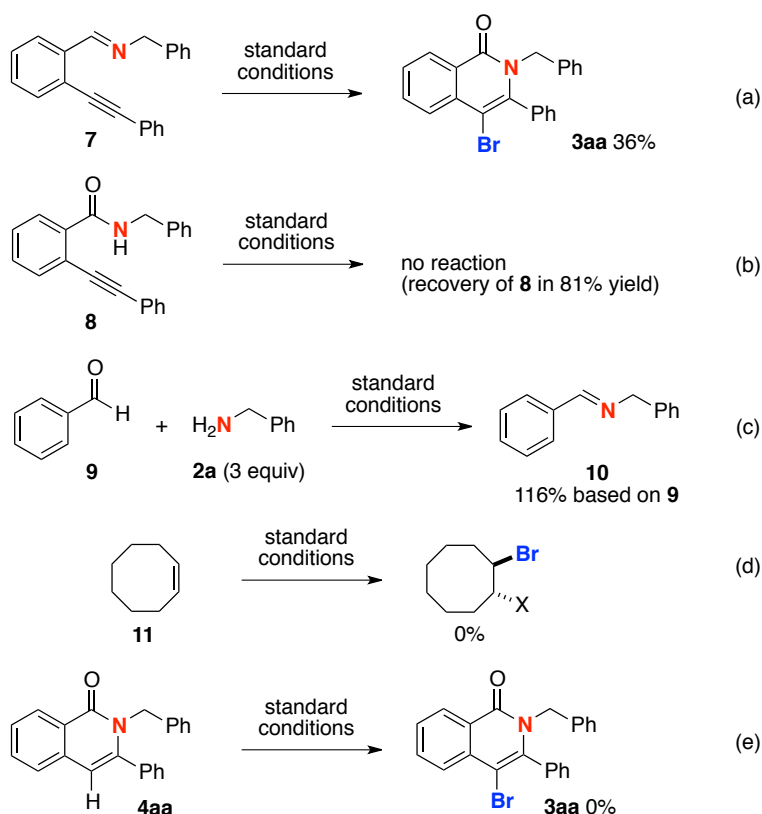

\*\*standard conditions:  $\text{CuBr}\cdot\text{SMe}_2$  (2.2 equiv) in benzene-pyridine (5:1),  $\text{SiO}_2$  80 °C, under an  $\text{O}_2$  atmosphere (1 atm).

<sup>16</sup> L. Yang, Z. Lu and S. S. Stahl, *Chem. Commun.* **2009**, 6460.

### Preparation of *N*-benzyl-2-(2-phenylethynyl)benzalimine (7):

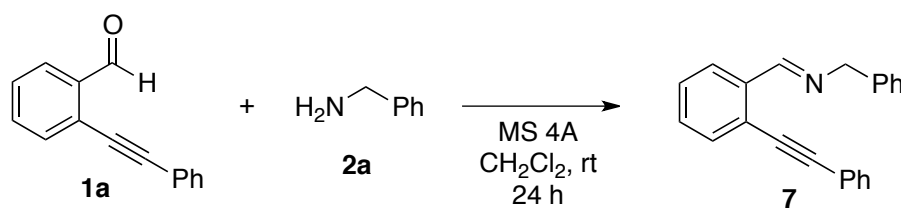

To a solution of 2-(2-phenylethynyl)benzaldehyde (**1a**) (206 mg, 1.0 mmol) in 1 mL of CH<sub>2</sub>Cl<sub>2</sub> were added benzylamine (**2a**) (107 mg, 1.0 mmol) and MS 4Å (20 mg). The reaction mixture was allowed to stir at room temperature for 24 h. After the completion of reaction, the mixture was filtered and volatile materials were removed in vacuo and the crude material was used for next reaction without further purification.

### *N*-Benzyl-2-(2-phenylethynyl)benzalimine (7)<sup>5</sup>

Brown oil; <sup>1</sup>H NMR (400 MHz, CDCl<sub>3</sub>) δ 4.90 (2H, s), 7.36-7.40 (10H, m), 7.50-7.57 (3H, m), 8.14 (1H, d, *J* = 6.8 Hz), 8.99 (1H, s); <sup>13</sup>C NMR (100 MHz, CDCl<sub>3</sub>) δ 65.1, 86.4, 94.9, 122.9, 124.1, 126.4, 127.0, 128.1, 128.4, 128.5, 128.58, 128.63, 130.3, 131.5, 132.5, 136.7, 139.1, 160.5.

### *N*-Benzyl-2-(phenylethynyl)benzamide (8)<sup>17</sup>

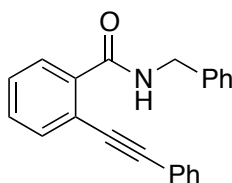

Prepared from *N*-benzyl-2-bromobenzamide and phenylacetylene by the same procedure with the section 2.1., and purified by flash column chromatography (Si gel, hexane:ethyl acetate = 80:20) in 95% yield; White solid; <sup>1</sup>H NMR (400 MHz, CDCl<sub>3</sub>) δ 4.70 (2H, d, *J* = 5.6 Hz), 7.13 (2H, d, *J* = 7.2 Hz), 7.22-7.29 (5H, m), 7.30-7.40 (3H, m), 7.42-7.48 (2H, m), 7.56-7.61 (1H, m), 7.80 (1H, brs), 8.12-8.17 (1H, m); <sup>13</sup>C NMR (100 MHz, CDCl<sub>3</sub>) δ 44.5, 87.5, 95.8, 119.6, 121.8, 127.5, 128.2, 128.4, 128.75, 128.86, 128.92, 130.2, 130.6, 131.4, 133.6, 135.0, 137.8, 166.1.

Both imine **10** and isoquinolone **4aa** were known compounds (see the references).

### *N*-Benzyl-benzaldimine (10)<sup>18</sup>

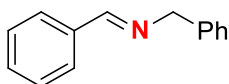

### 2-Benzyl-3-phenylisoquinolin-1(2*H*)-one (4aa)<sup>19</sup>

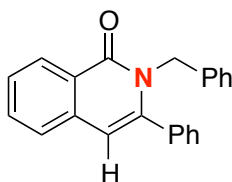

<sup>17</sup> G. Liu, Y. Zhou, D. Ye, D. Zhang, X. Ding, H. Jiang, H. Liu, *Adv. Synth. Catal.* **2009**, *351*, 2605.

<sup>18</sup> L. G. Marinescu, C. M. Pedersen, M. Bols, *Tetrahedron* **2004**, *61*, 123.

<sup>19</sup> N. Sakai, K. Annaka, A. Fujita, A. Sato, T. Konakahara, *J. Org. Chem.* **2008**, *73*, 4160.

#### 4. $^1\text{H}$ and $^{13}\text{C}$ NMR spectrum of new compounds

$^1\text{H}$  NMR spectrum of **1d** (400 MHz,  $\text{CDCl}_3$ )

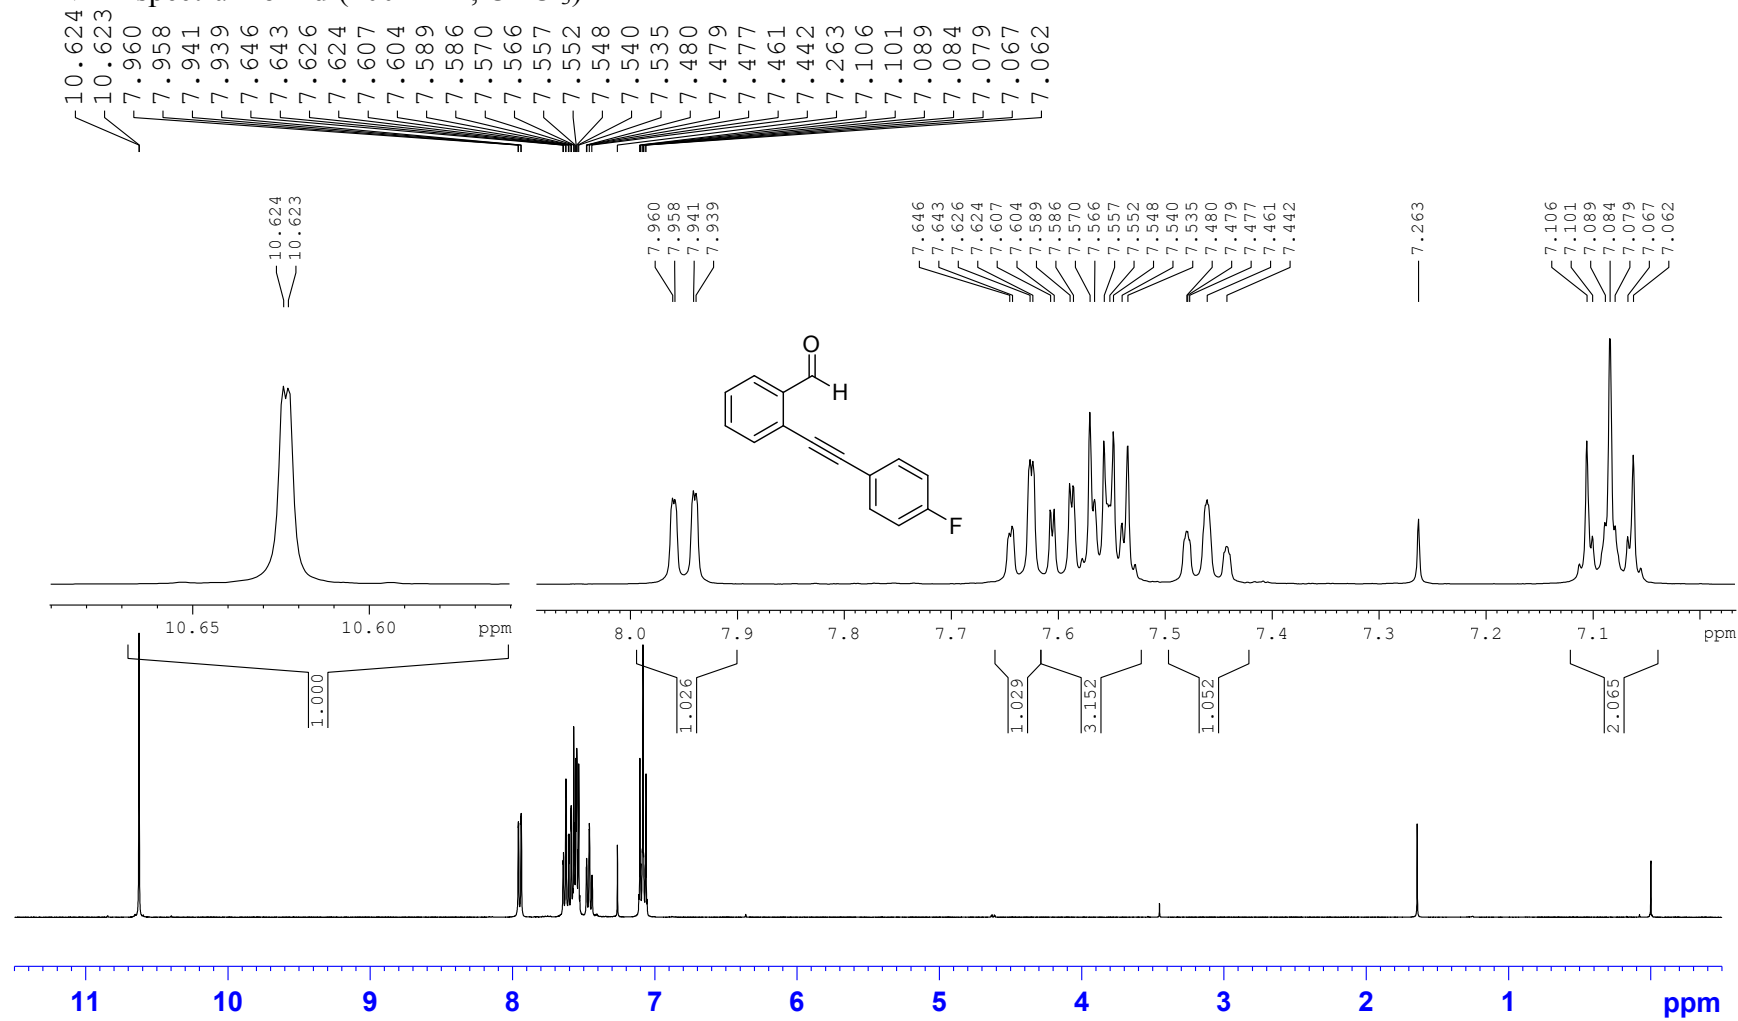



#### 4. $^1\text{H}$ and $^{13}\text{C}$ NMR spectrum of new compounds

$^{13}\text{C}$  NMR spectrum of **1d** (100 MHz,  $\text{CDCl}_3$ )

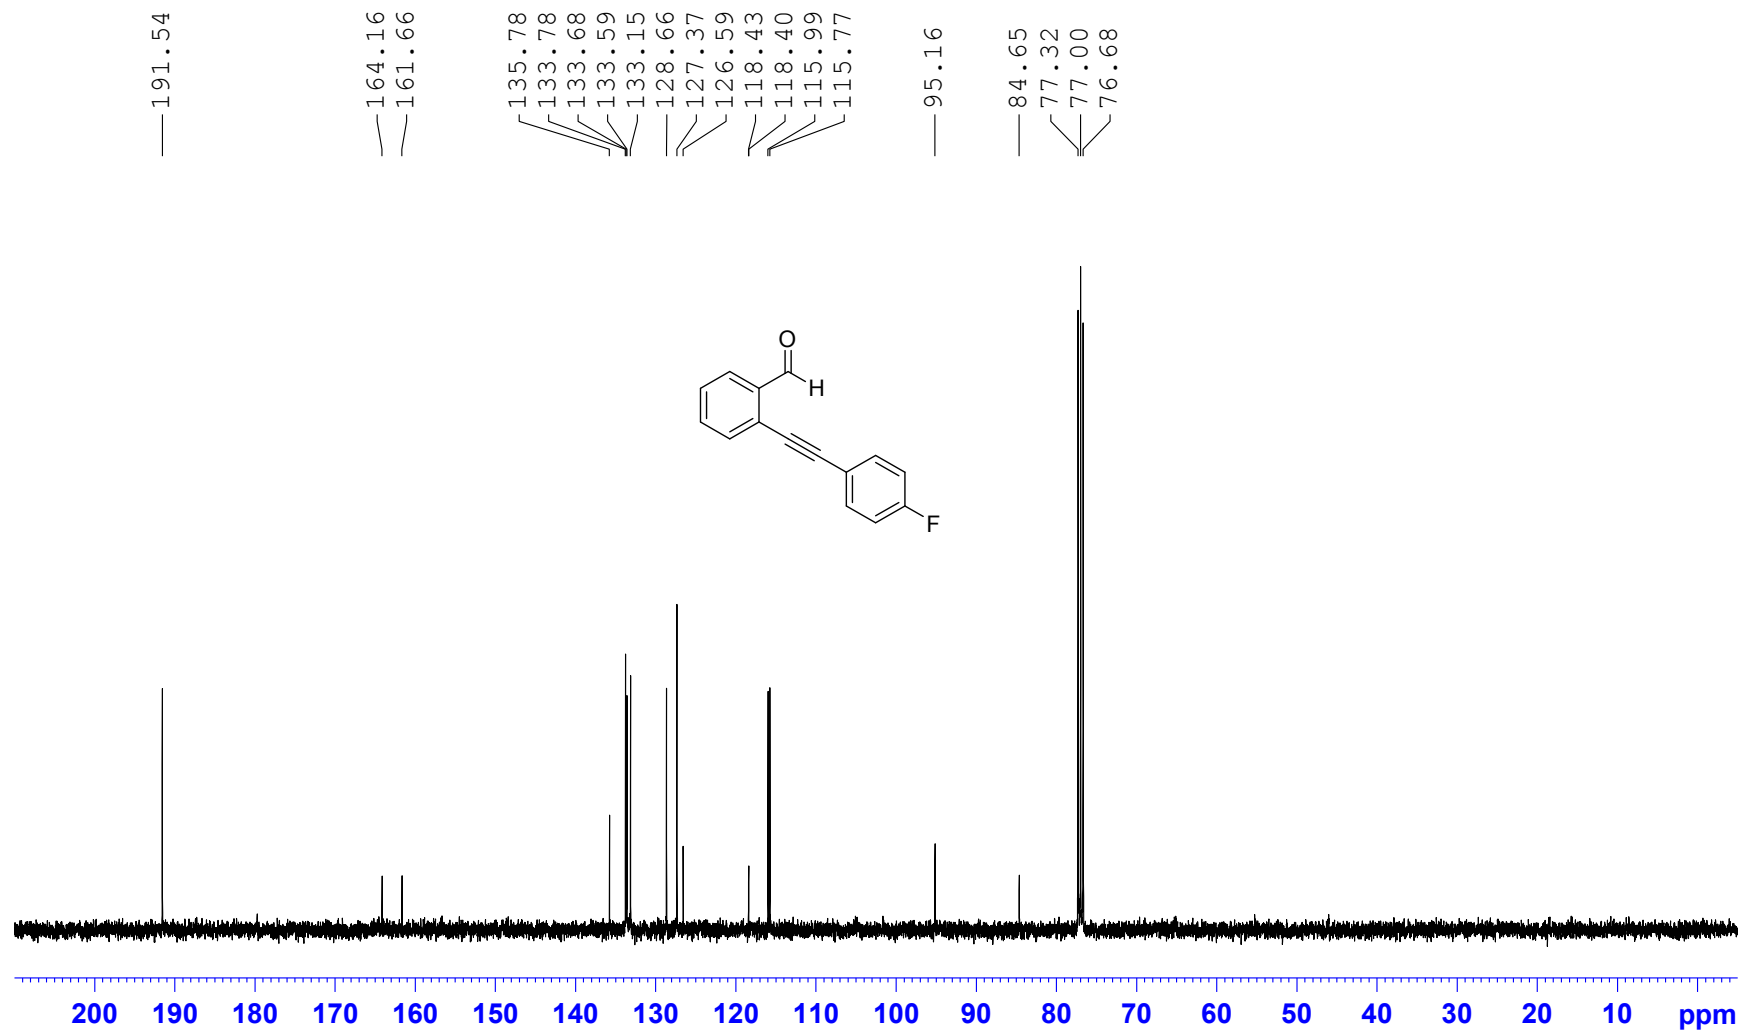

#### 4. $^1\text{H}$ and $^{13}\text{C}$ NMR spectrum of new compounds

$^1\text{H}$  NMR spectrum of **1j** (400 MHz,  $\text{CDCl}_3$ )

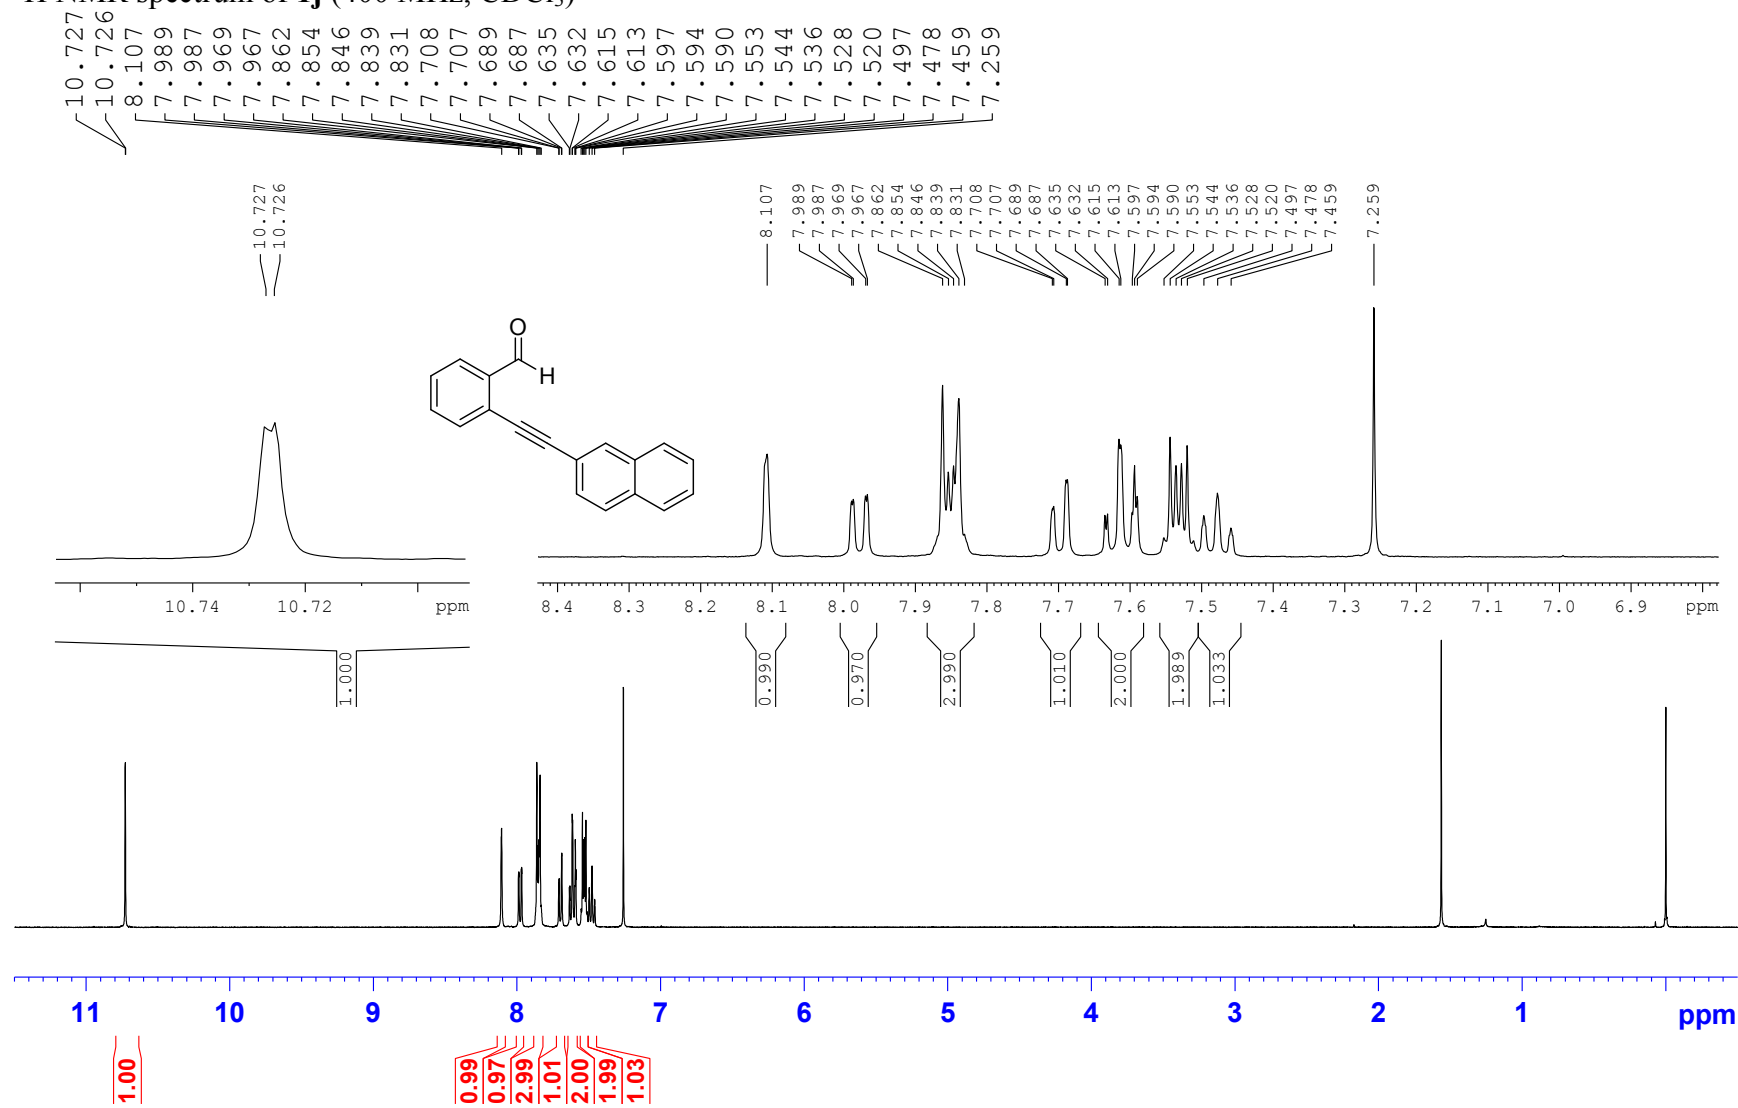

#### 4. $^1\text{H}$ and $^{13}\text{C}$ NMR spectrum of new compounds

$^{13}\text{C}$  NMR spectrum of **1j** (100 MHz,  $\text{CDCl}_3$ )

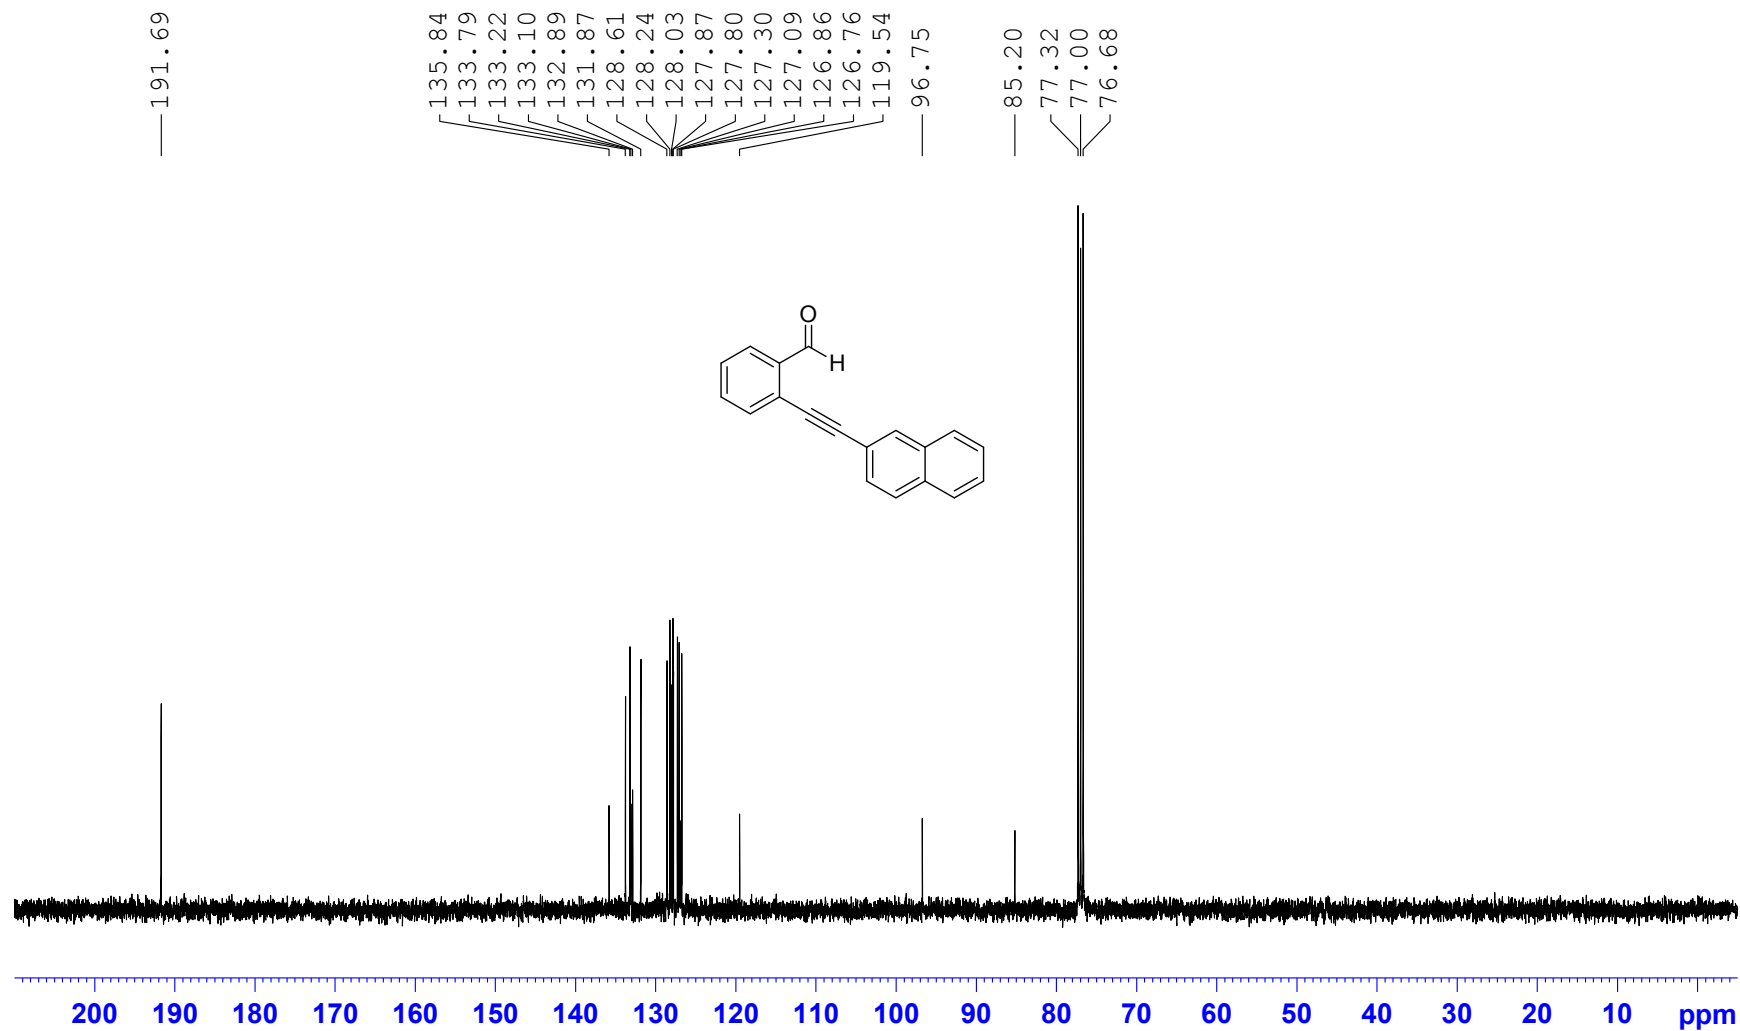

#### 4. $^1\text{H}$ and $^{13}\text{C}$ NMR spectrum of new compounds

$^1\text{H}$  NMR spectrum of **1n** (400 MHz,  $\text{CDCl}_3$ )

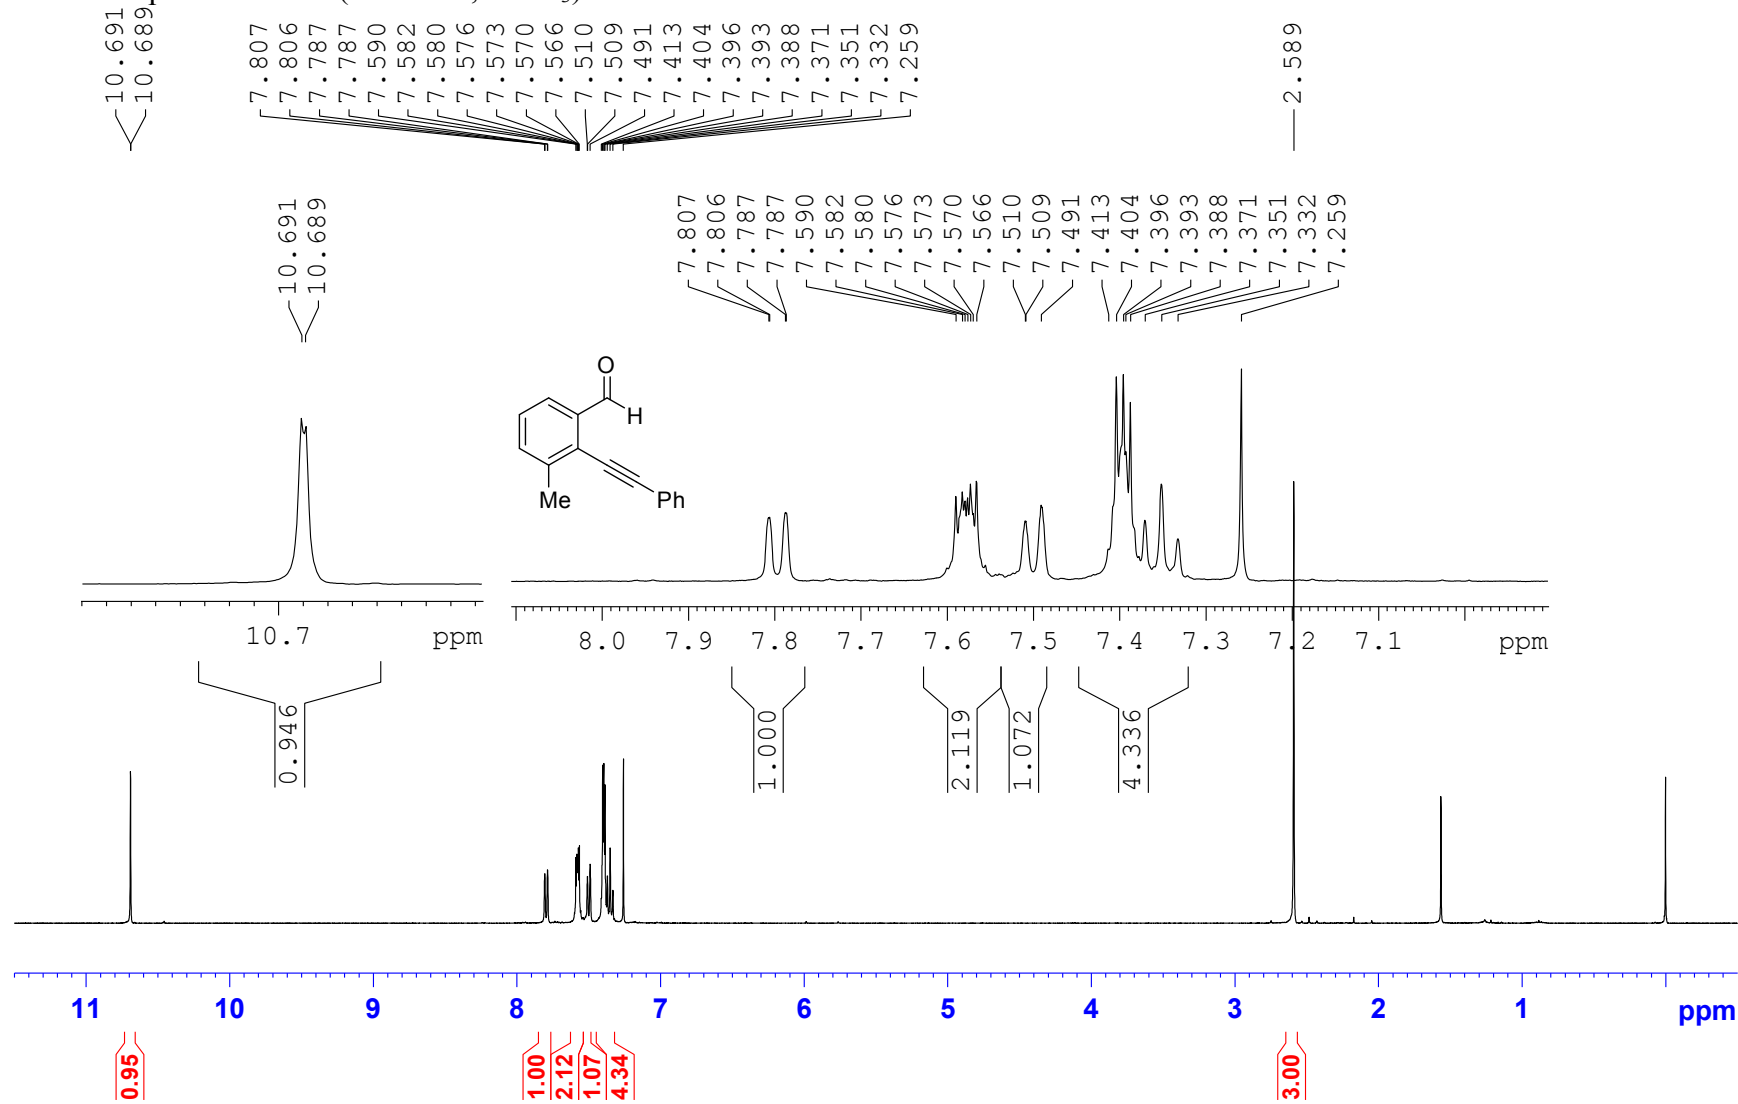

#### 4. $^1\text{H}$ and $^{13}\text{C}$ NMR spectrum of new compounds

$^{13}\text{C}$  NMR spectrum of **1n** (100 MHz,  $\text{CDCl}_3$ )

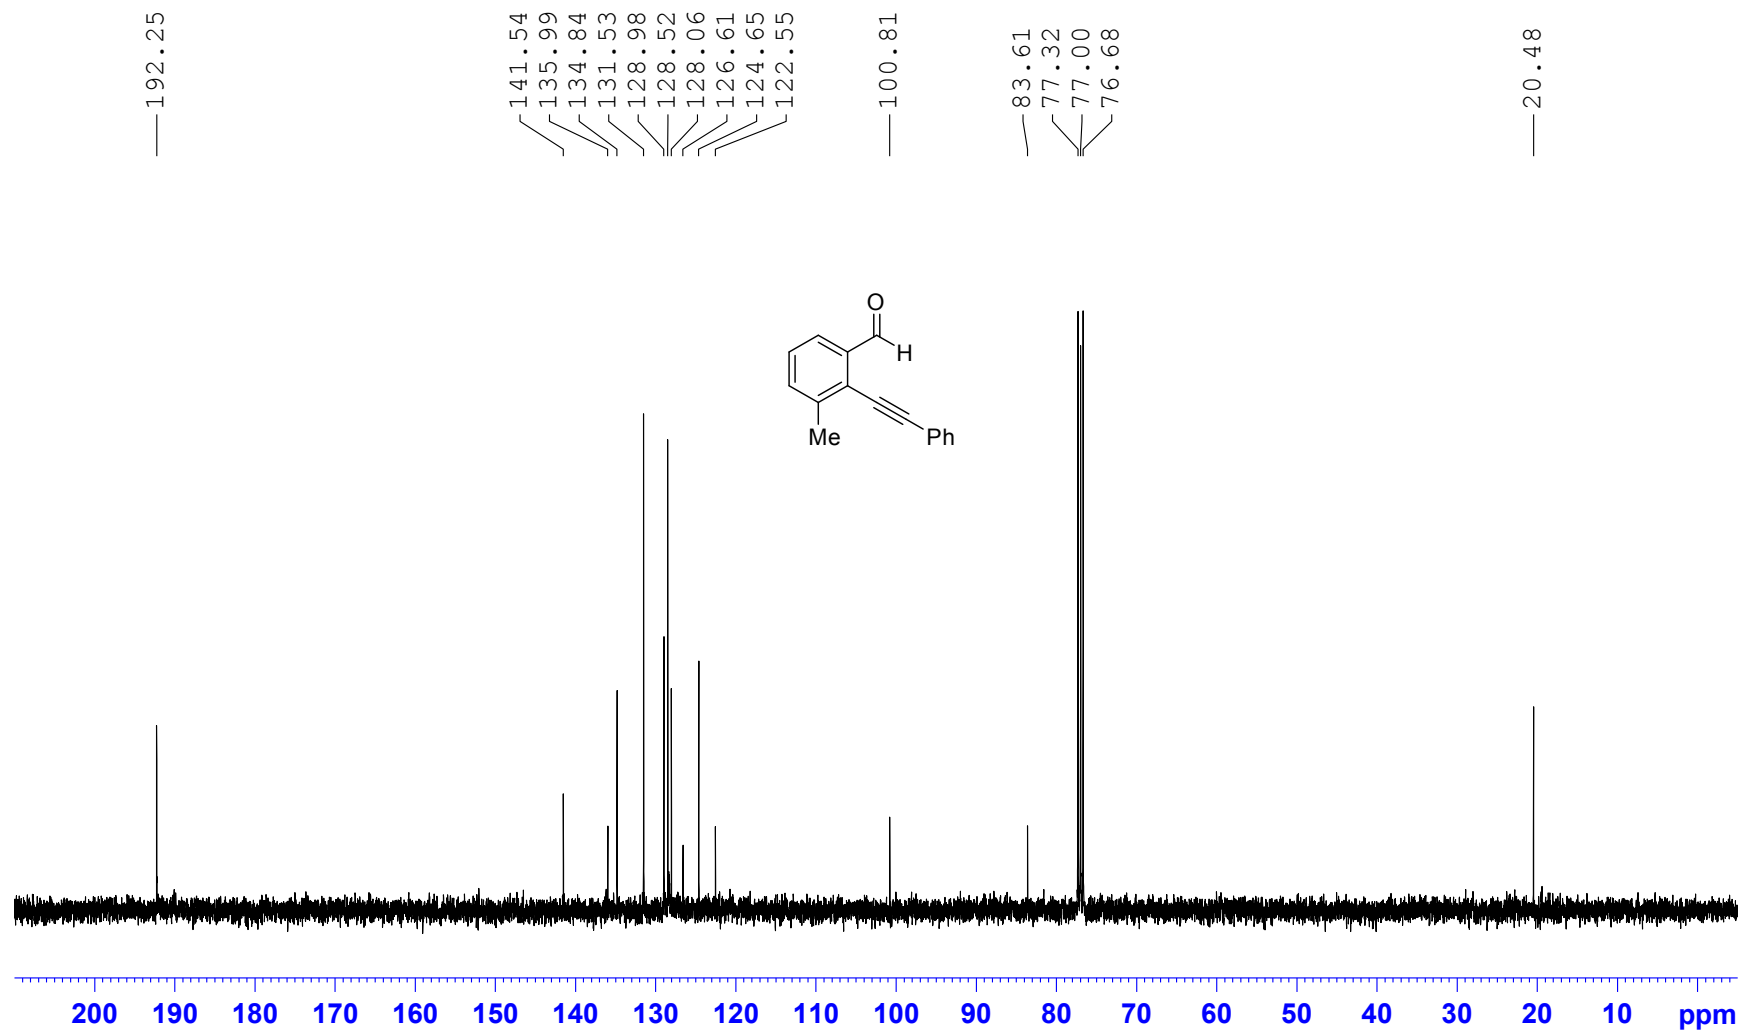

#### 4. $^1\text{H}$ and $^{13}\text{C}$ NMR spectrum of new compounds

$^1\text{H}$  NMR spectrum of **1r** (400 MHz,  $\text{CDCl}_3$ )

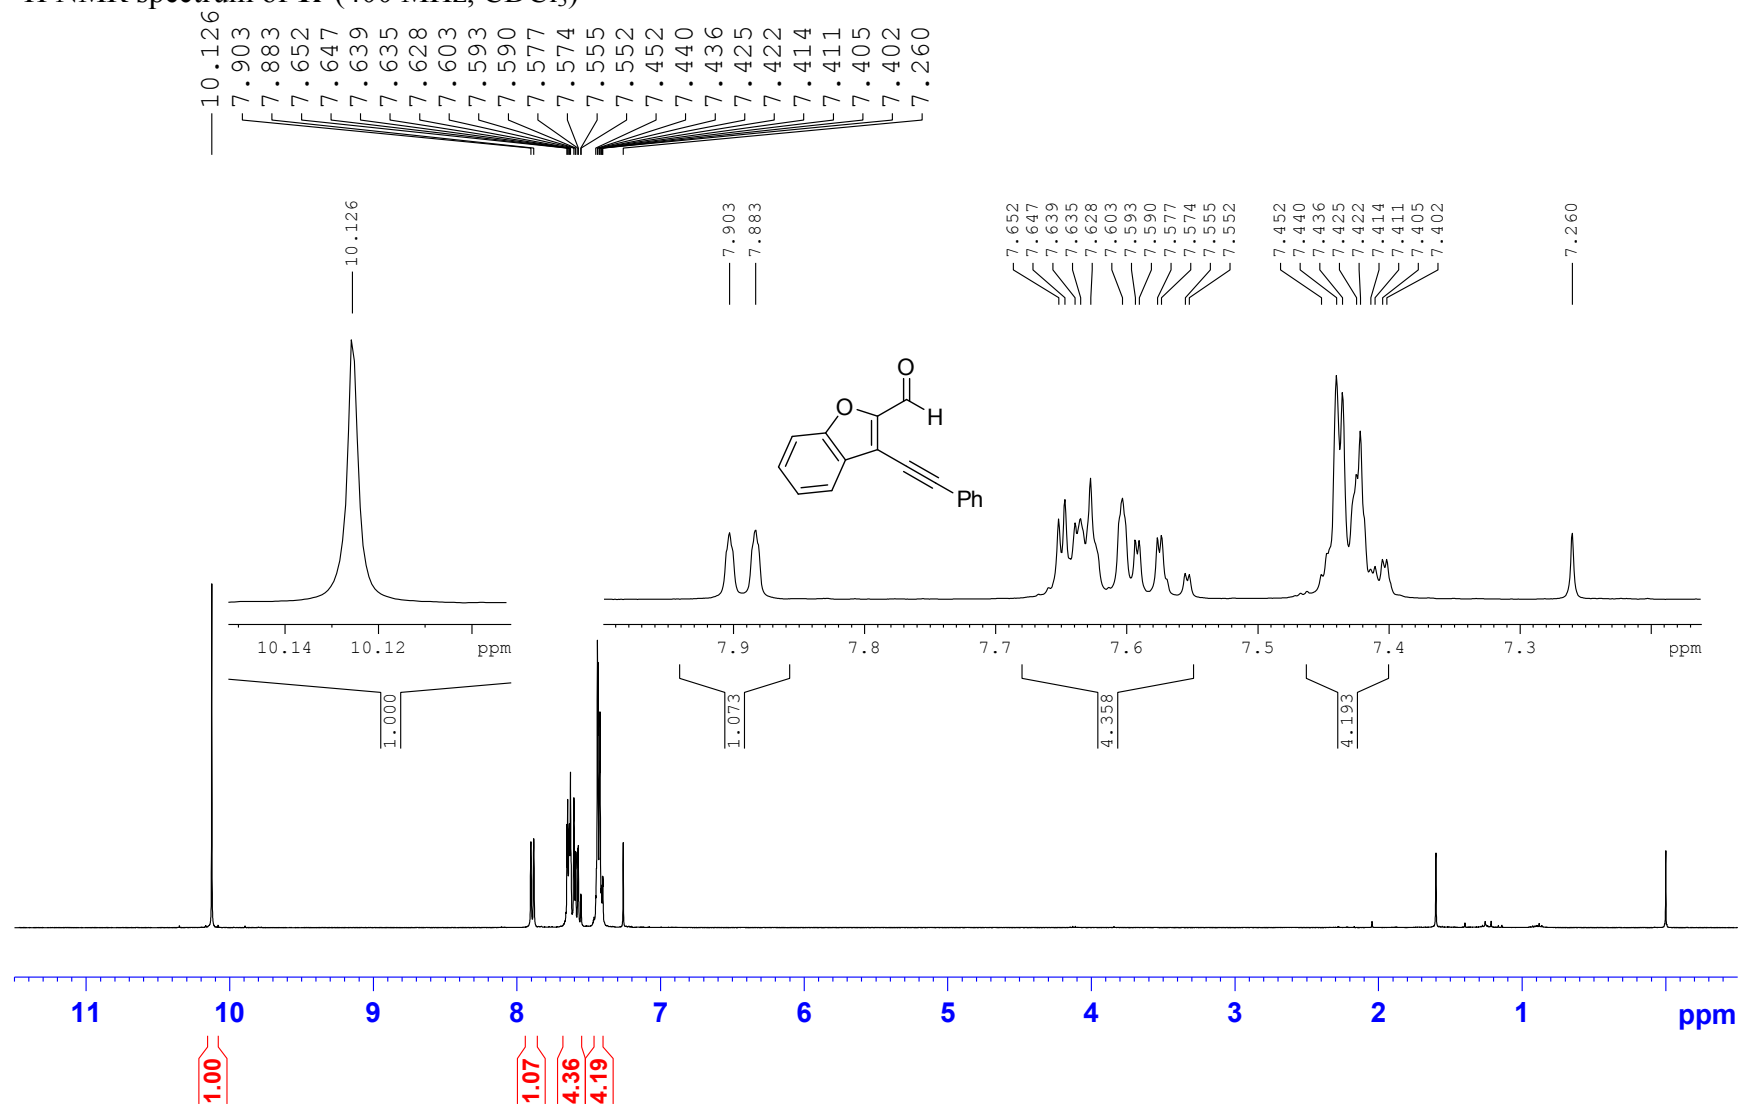

#### 4. $^1\text{H}$ and $^{13}\text{C}$ NMR spectrum of new compounds

$^{13}\text{C}$  NMR spectrum of **1r** (100 MHz,  $\text{CDCl}_3$ )

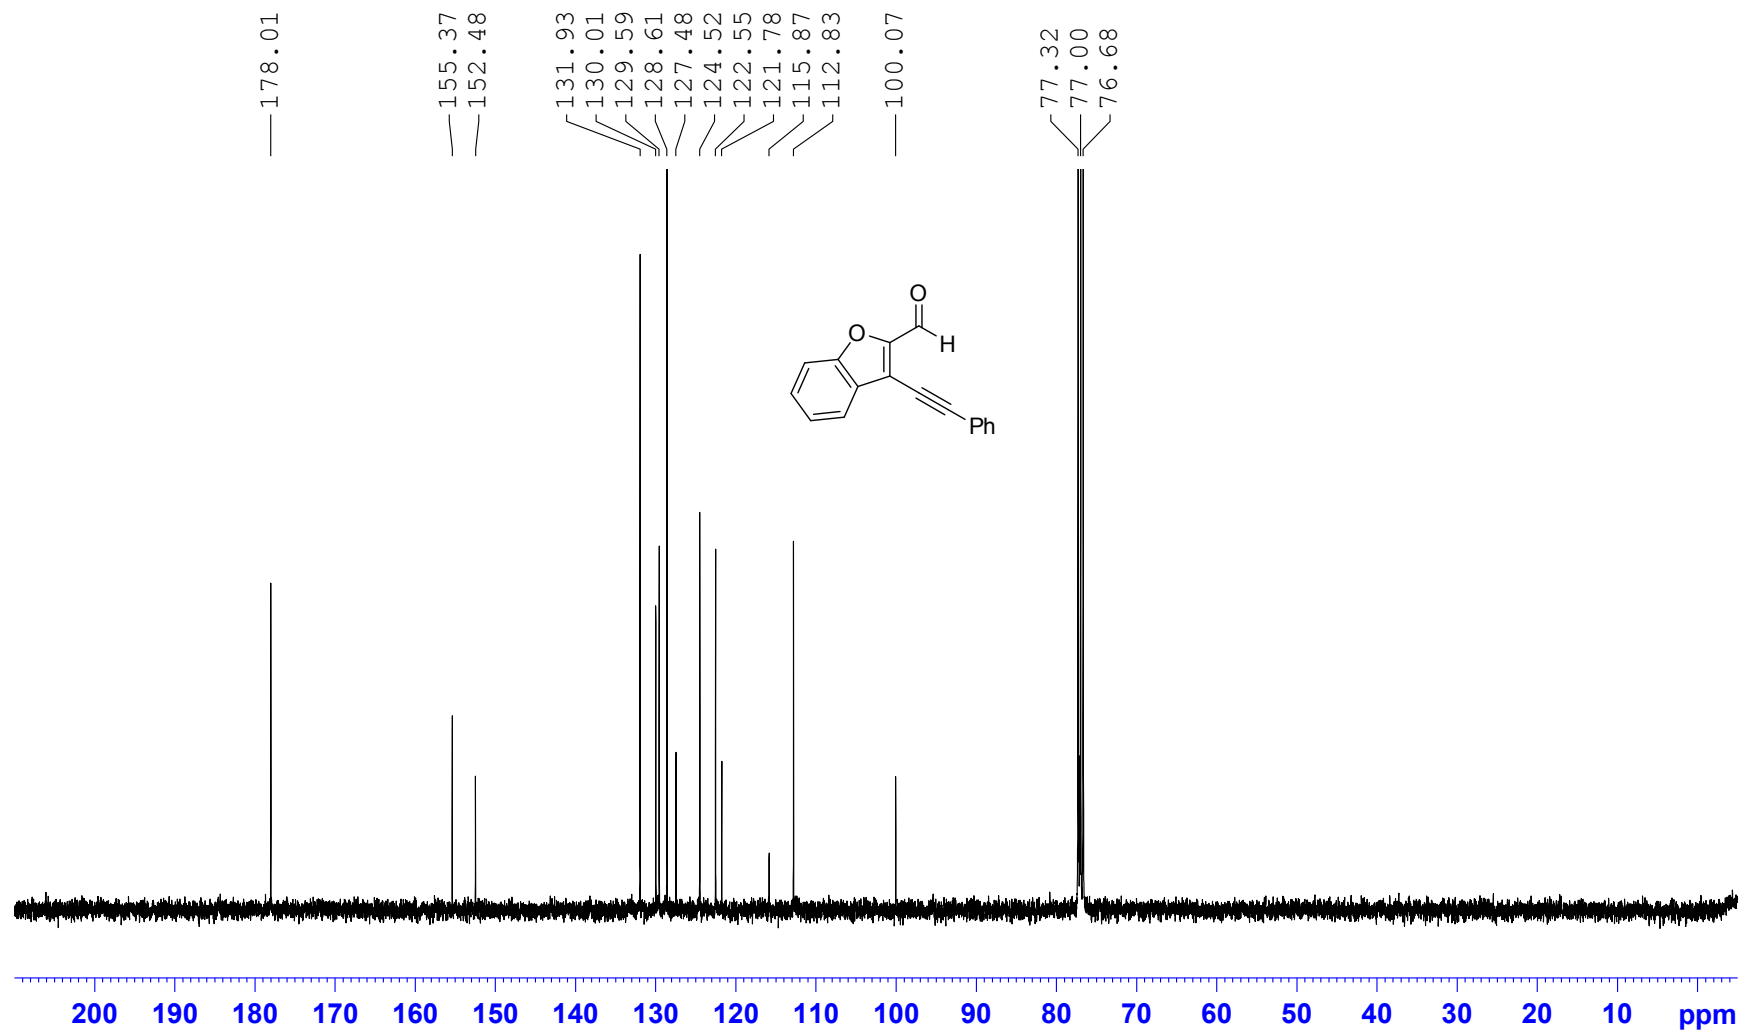

#### 4. $^1\text{H}$ and $^{13}\text{C}$ NMR spectrum of new compounds

$^1\text{H}$  NMR spectrum of **3aa** (400 MHz,  $\text{CDCl}_3$ )

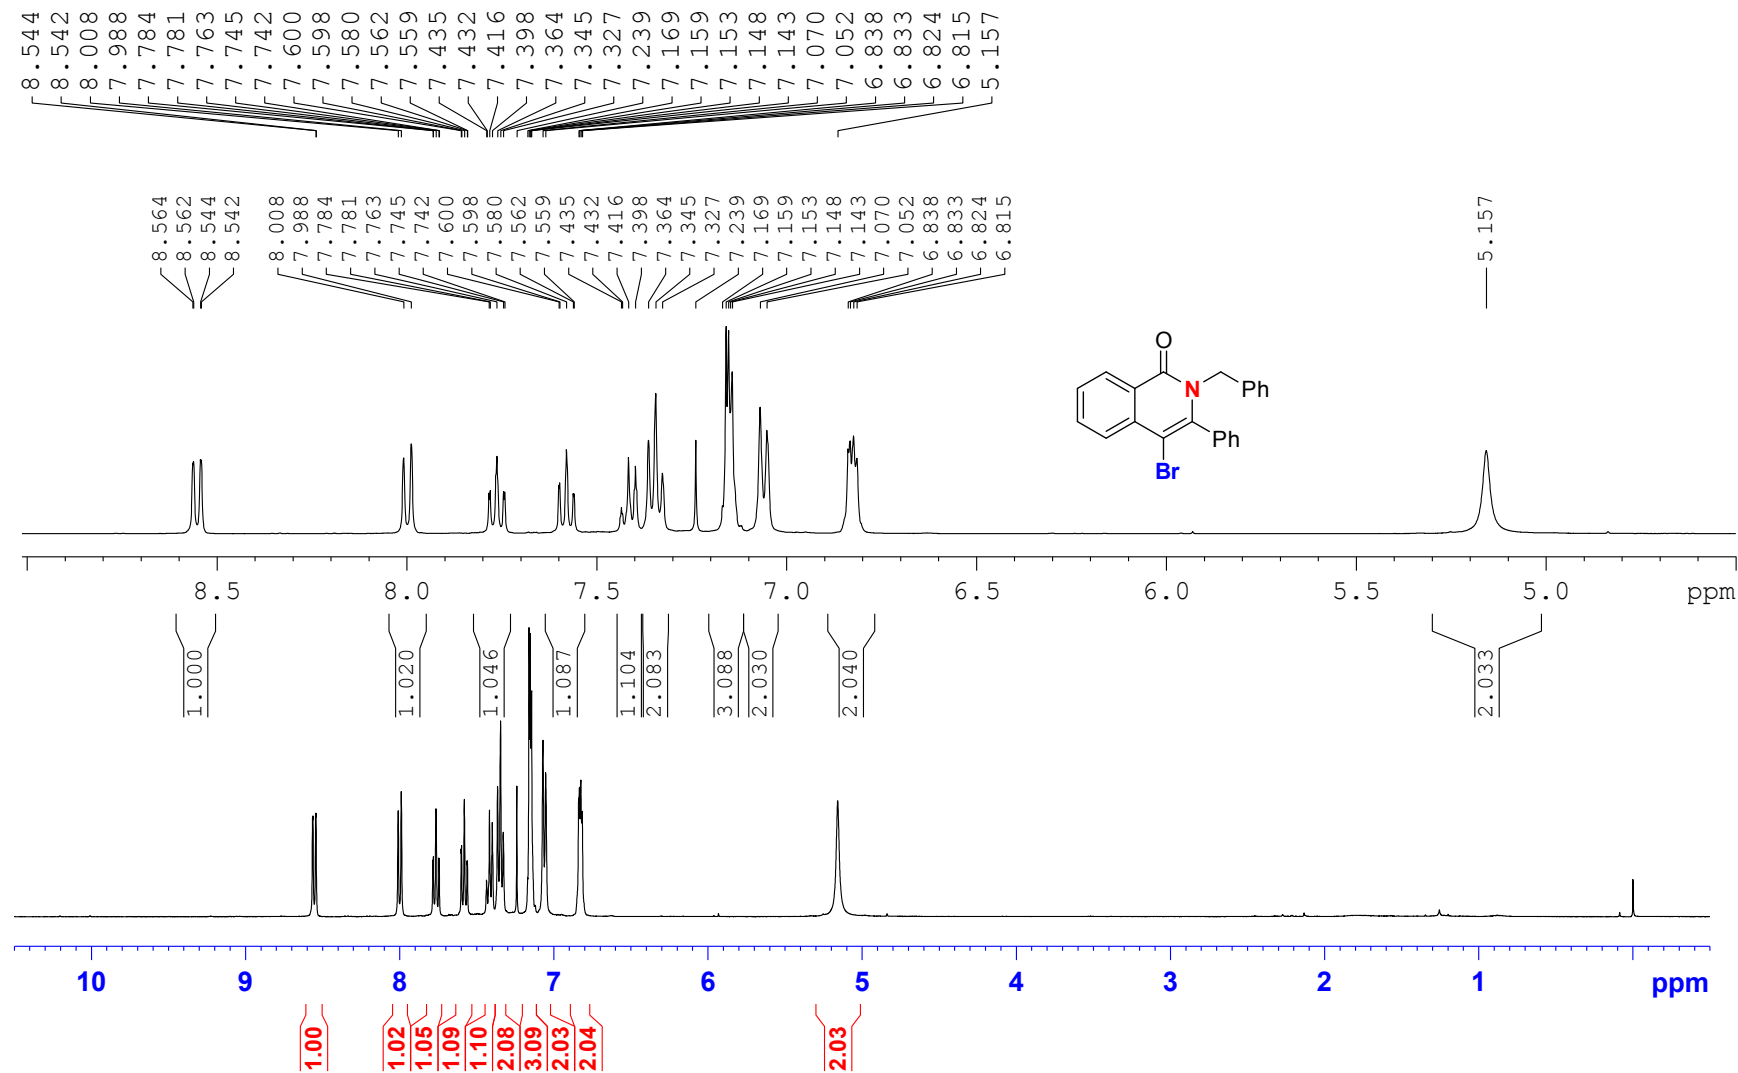



#### 4. $^1\text{H}$ and $^{13}\text{C}$ NMR spectrum of new compounds

$^{13}\text{C}$  NMR spectrum of **3aa** (100 MHz,  $\text{CDCl}_3$ )

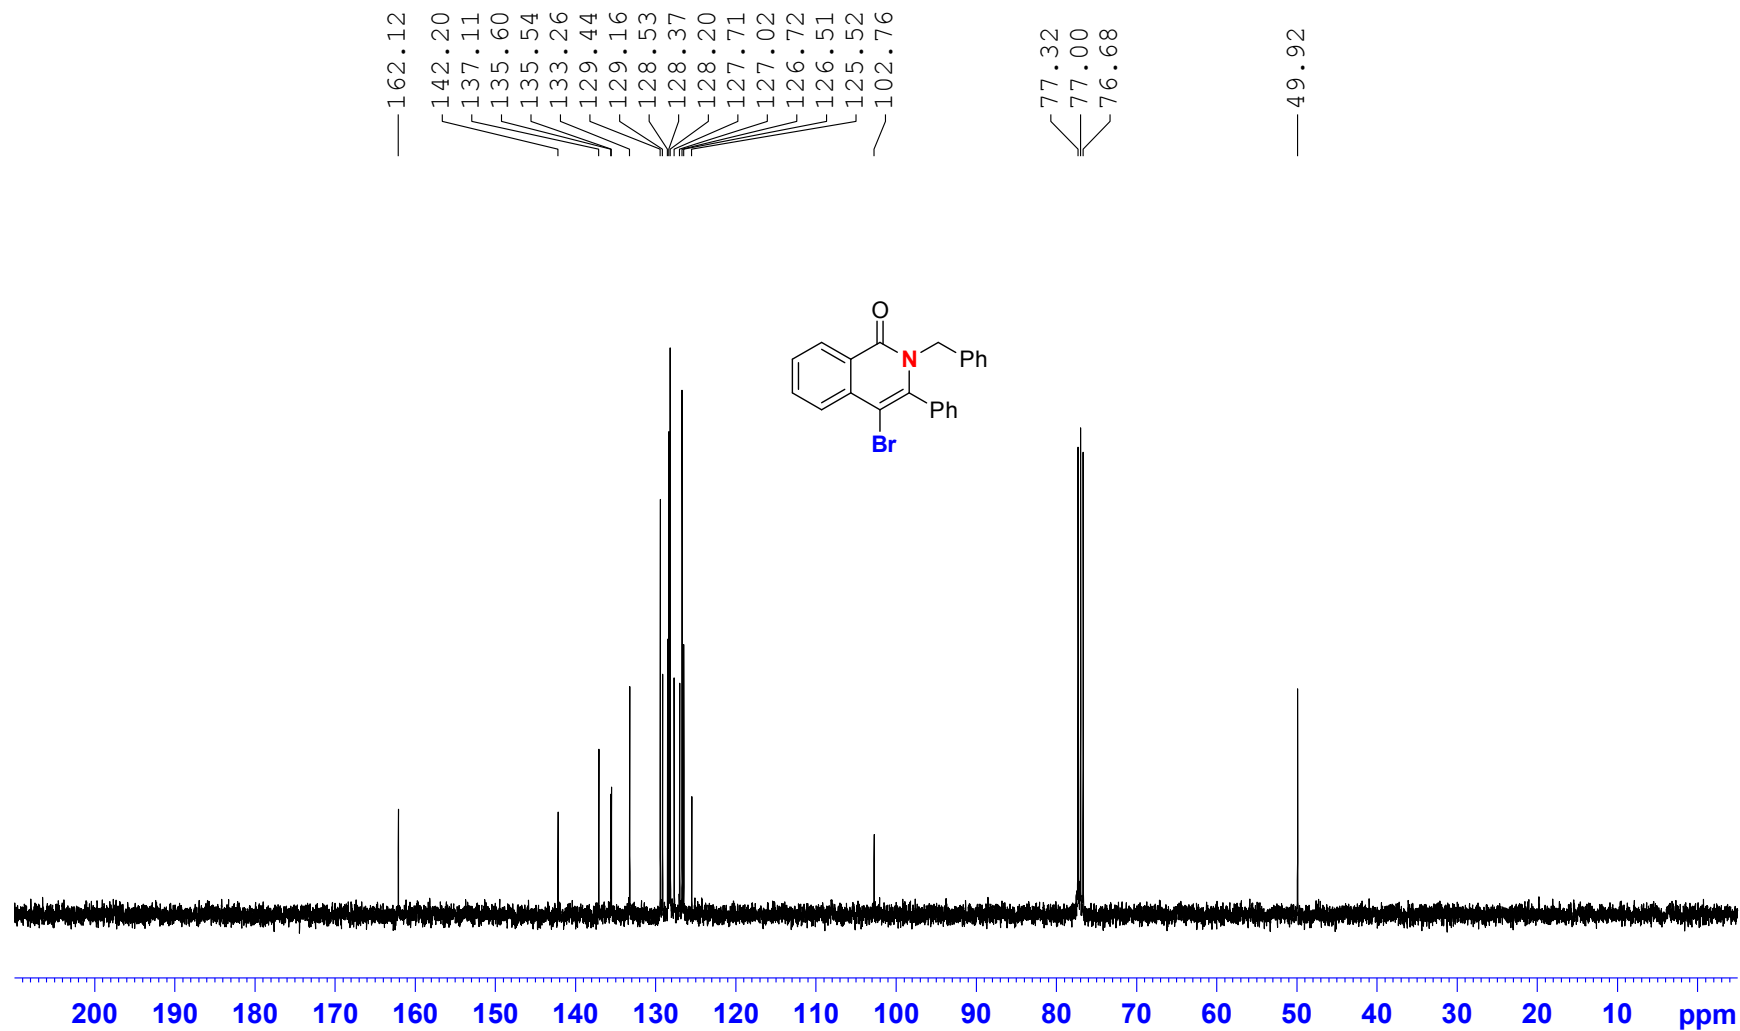

#### 4. $^1\text{H}$ and $^{13}\text{C}$ NMR spectrum of new compounds

$^1\text{H}$  NMR spectrum of **3aa'** (400 MHz,  $\text{CDCl}_3$ )

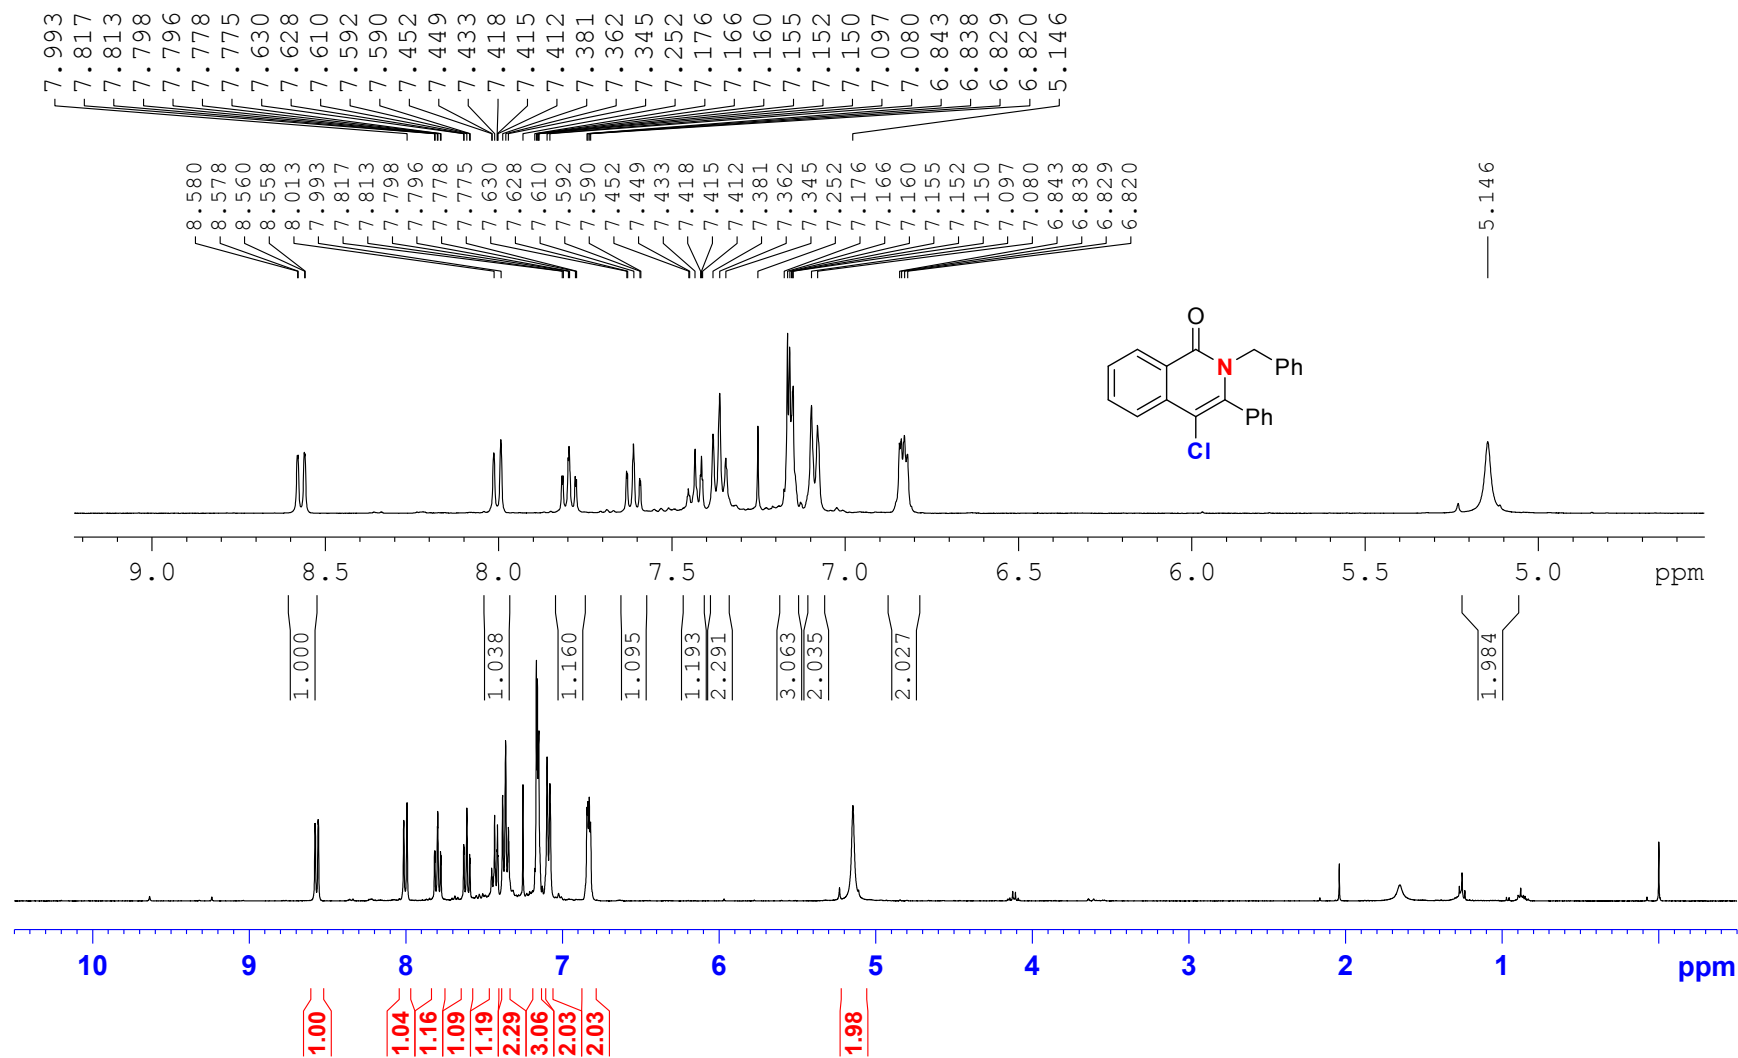

#### 4. $^1\text{H}$ and $^{13}\text{C}$ NMR spectrum of new compounds

$^{13}\text{C}$  NMR spectrum of **3aa'** (100 MHz,  $\text{CDCl}_3$ )

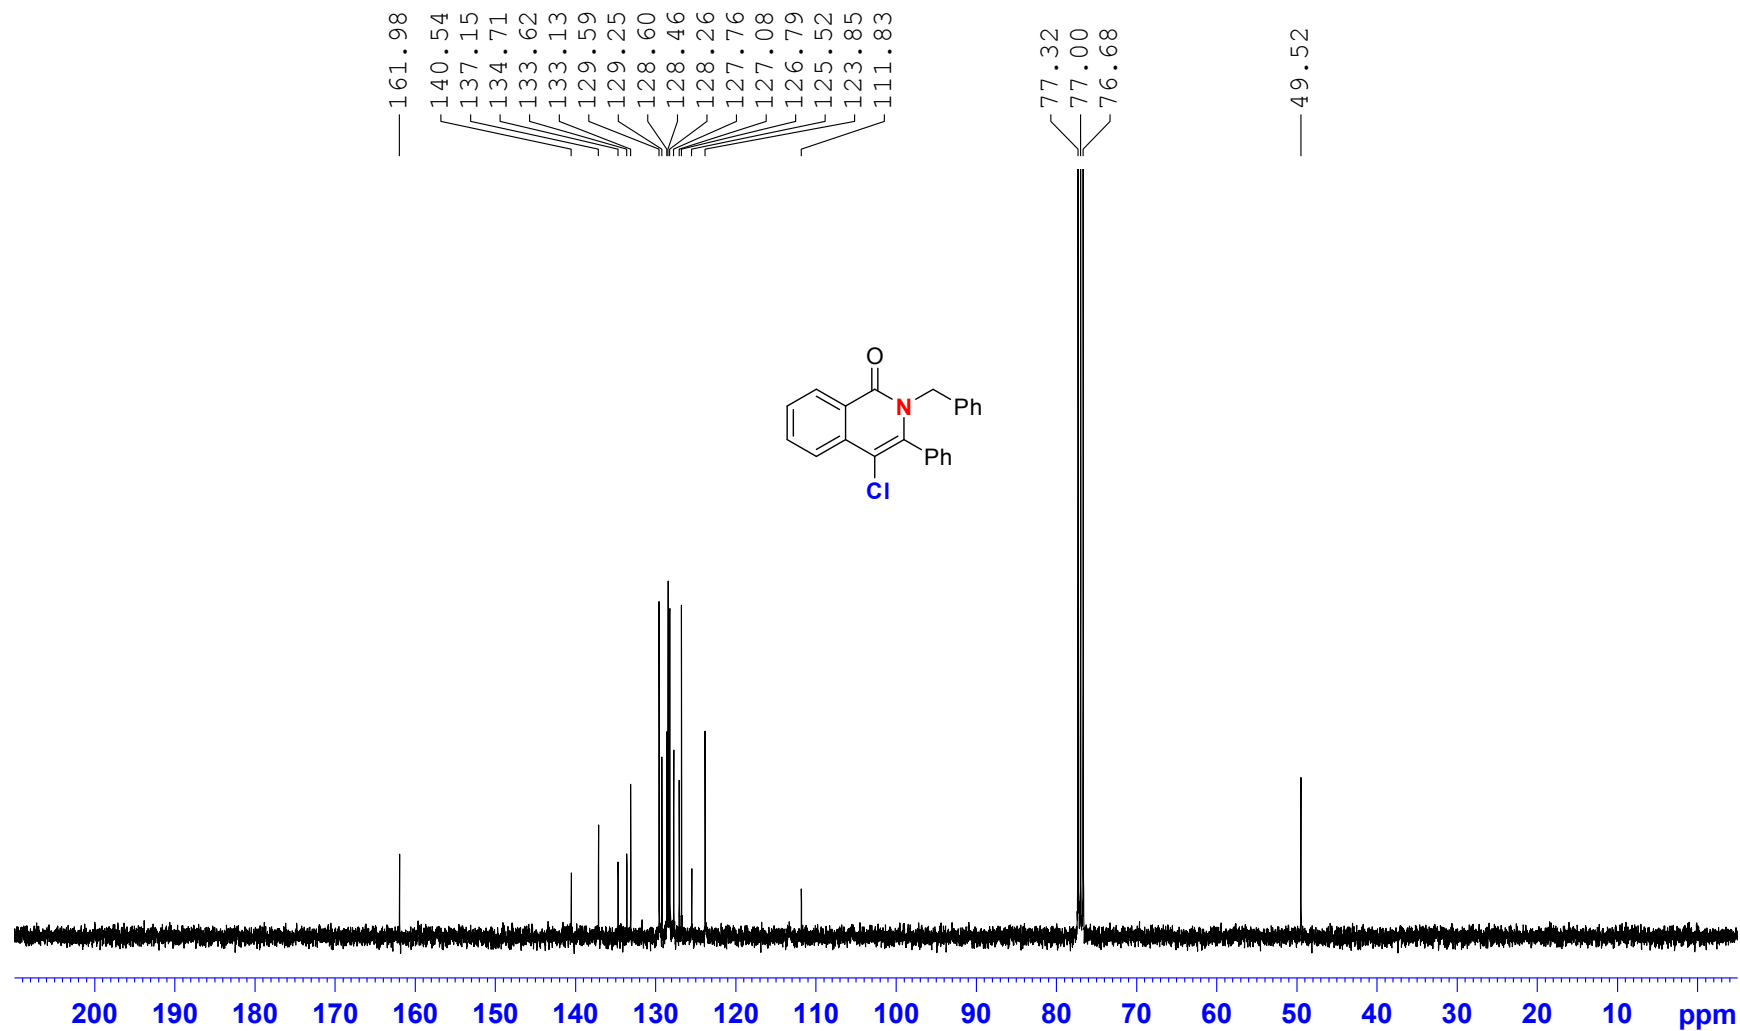

#### 4. $^1\text{H}$ and $^{13}\text{C}$ NMR spectrum of new compounds

$^1\text{H}$  NMR spectrum of **3aa''** (400 MHz,  $\text{CDCl}_3$ )

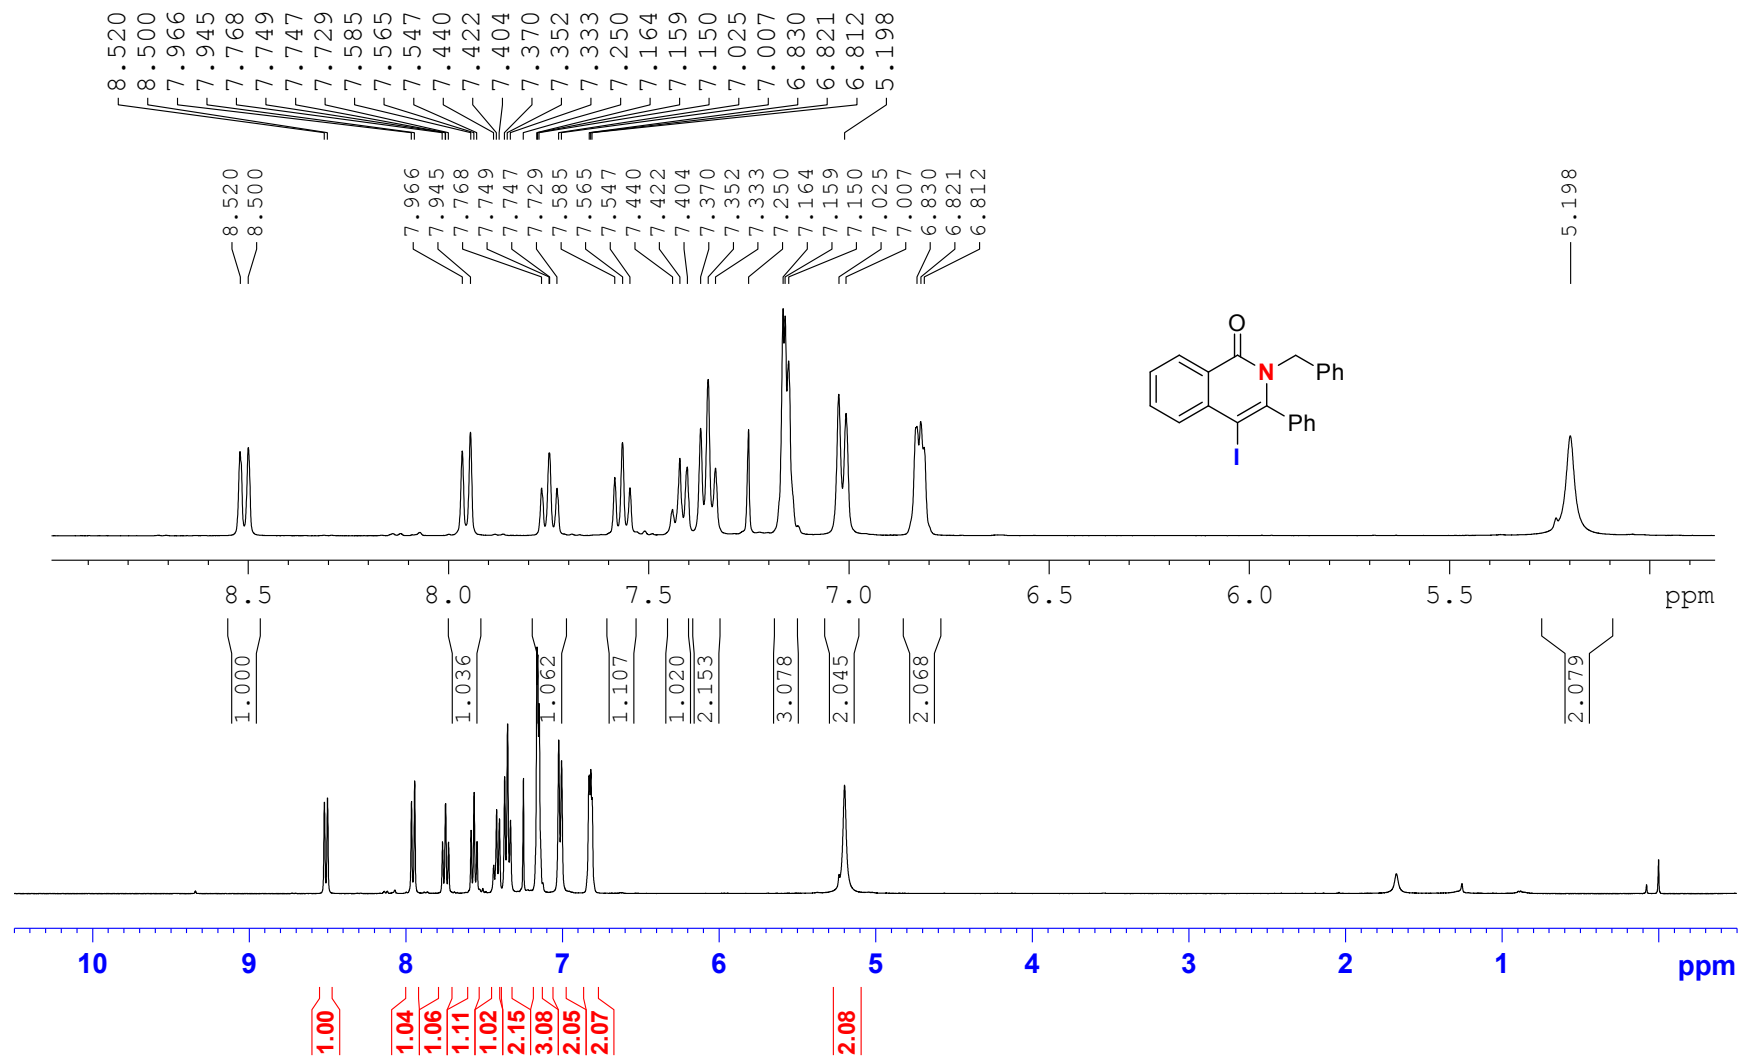

#### 4. $^1\text{H}$ and $^{13}\text{C}$ NMR spectrum of new compounds

$^{13}\text{C}$  NMR spectrum of **3aa''** (100 MHz,  $\text{CDCl}_3$ )

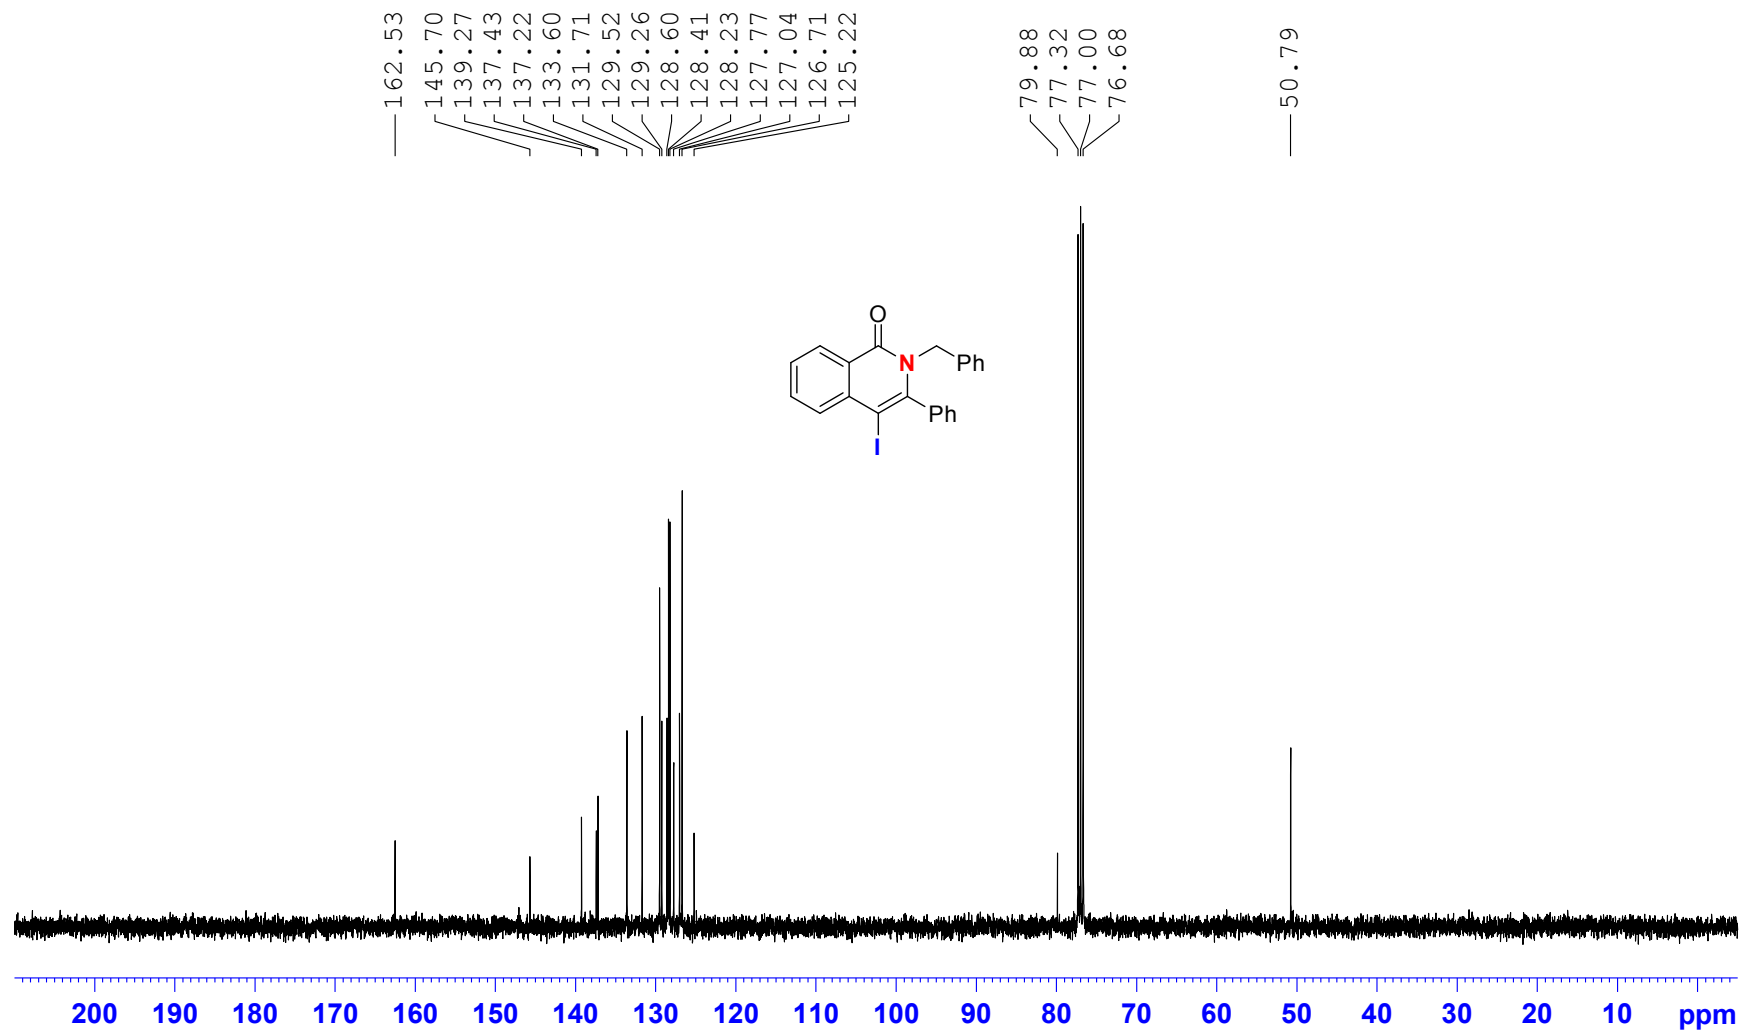

#### 4. $^1\text{H}$ and $^{13}\text{C}$ NMR spectrum of new compounds

$^1\text{H}$  NMR spectrum of **3ab** (400 MHz,  $\text{CDCl}_3$ )

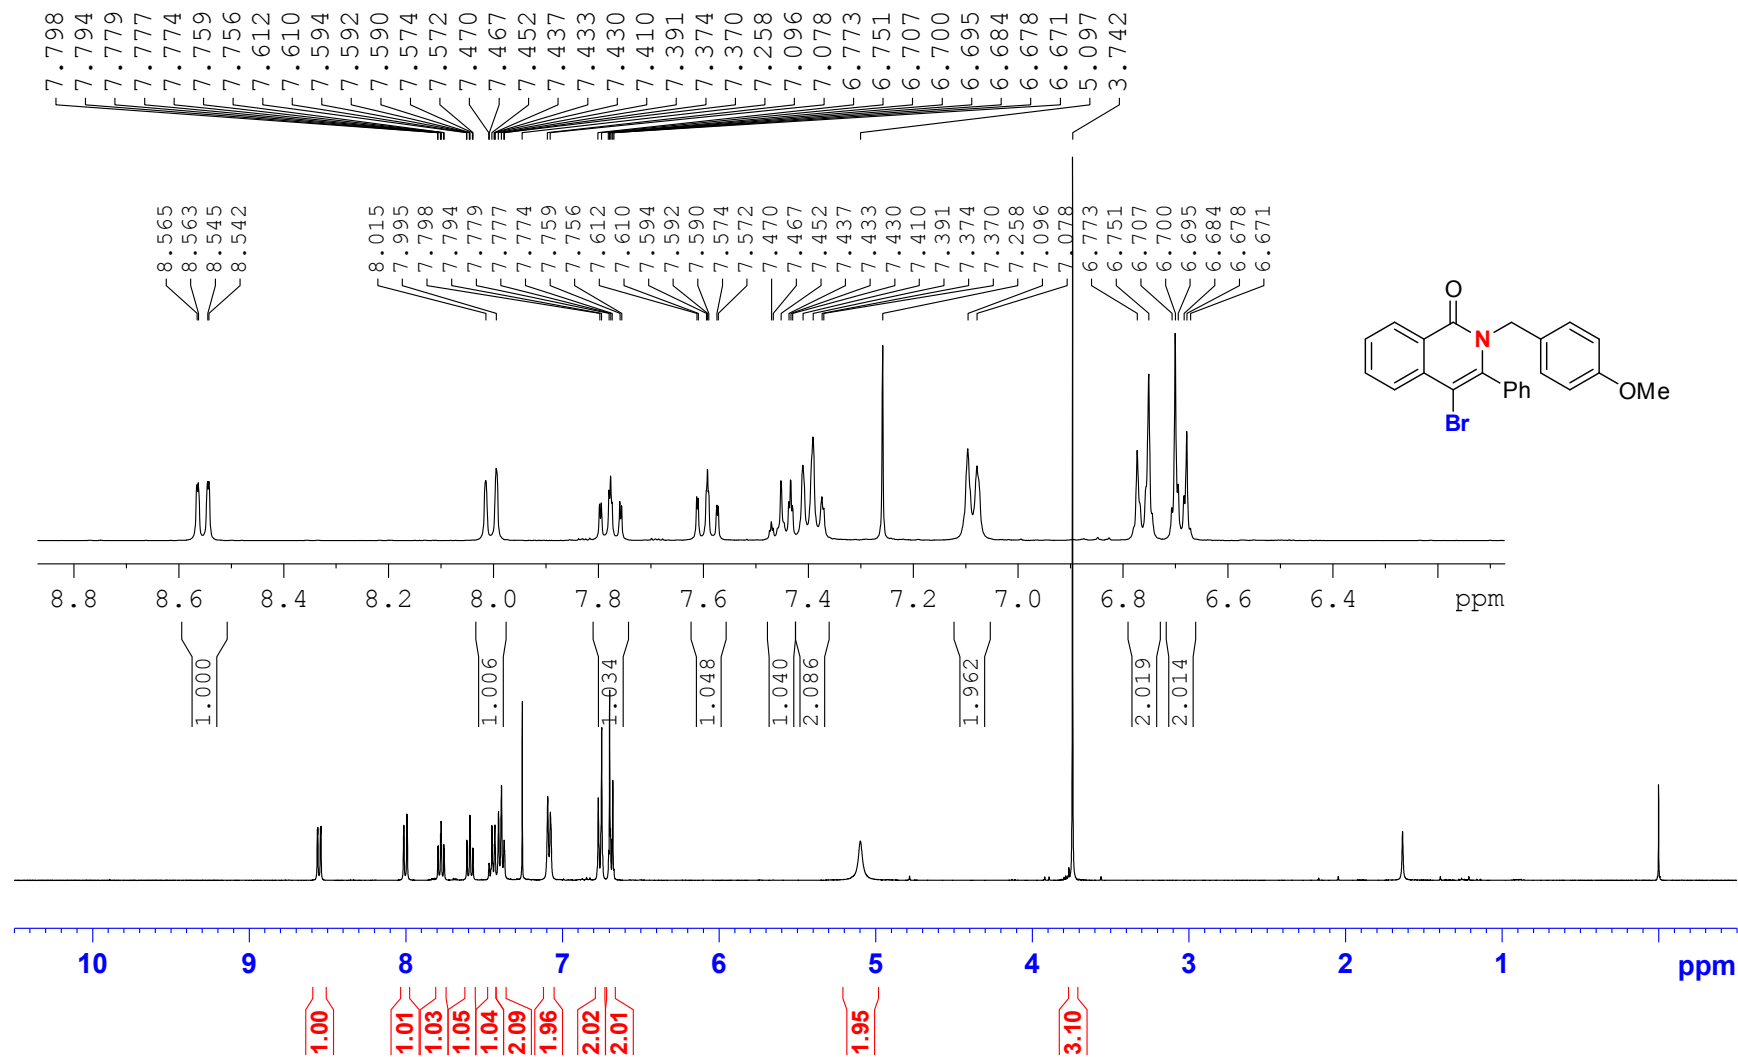

#### 4. $^1\text{H}$ and $^{13}\text{C}$ NMR spectrum of new compounds

$^{13}\text{C}$  NMR spectrum of **3ab** (100 MHz,  $\text{CDCl}_3$ )

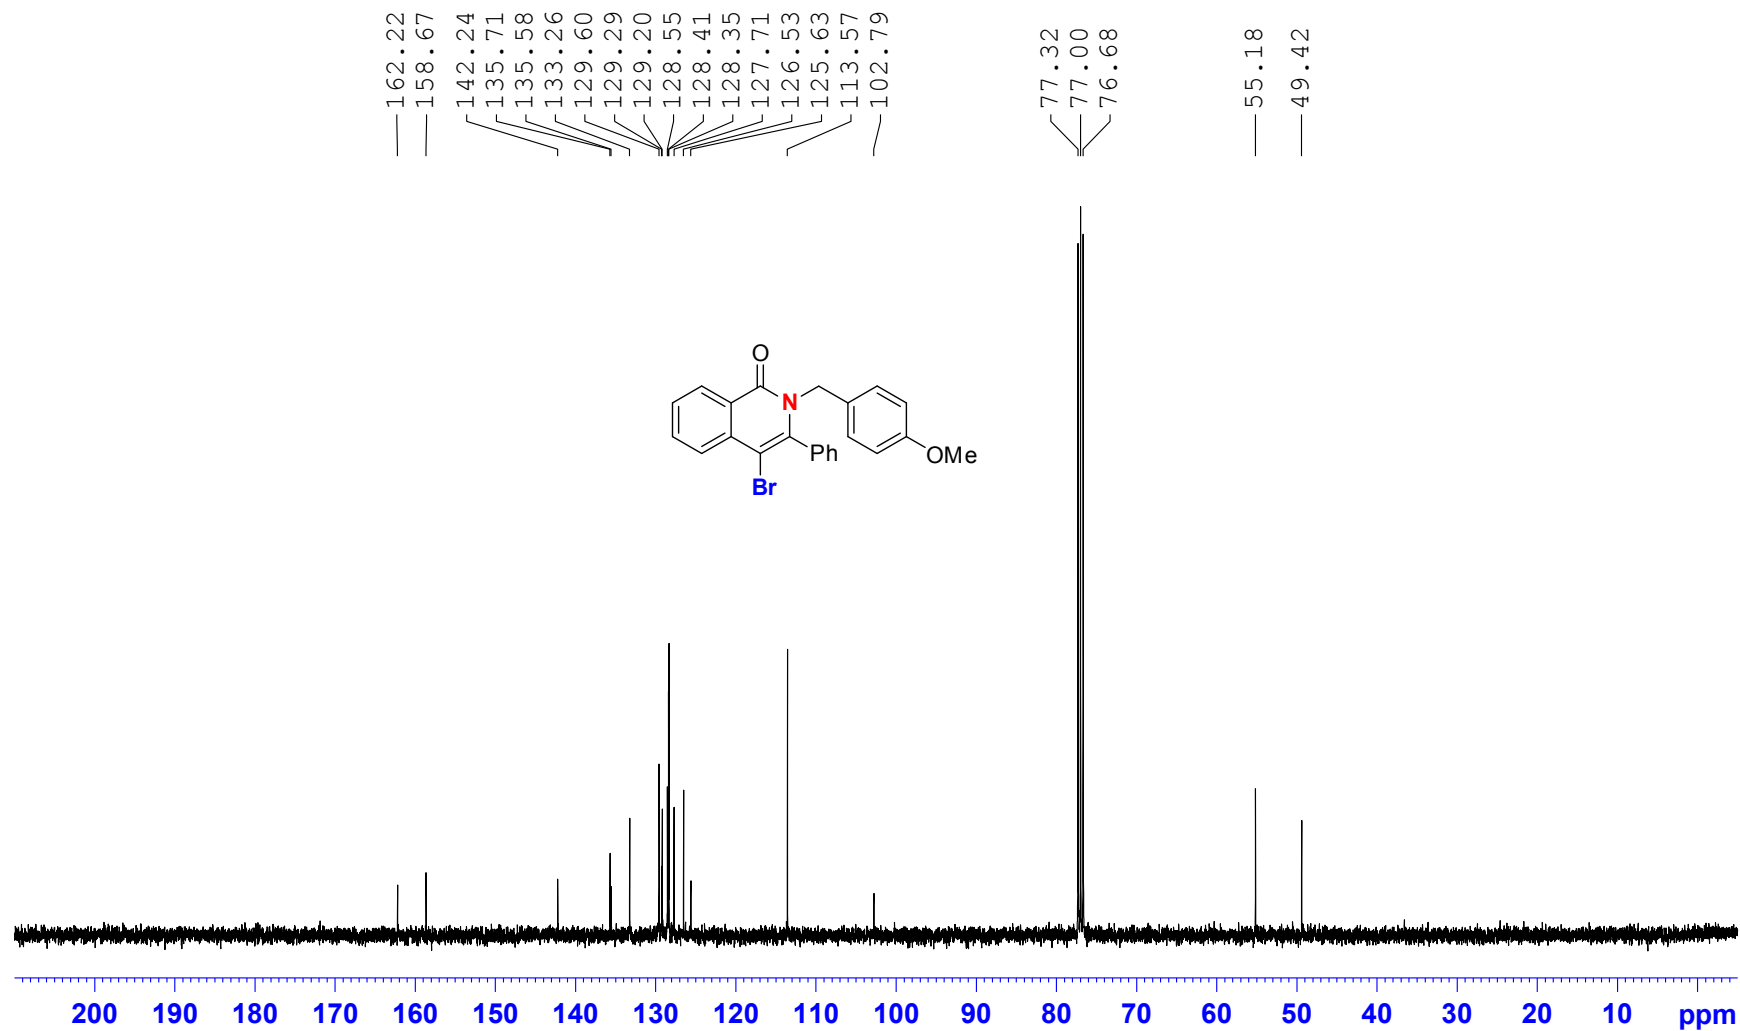

#### 4. $^1\text{H}$ and $^{13}\text{C}$ NMR spectrum of new compounds

$^1\text{H}$  NMR spectrum of **3ac** (400 MHz,  $\text{CDCl}_3$ )

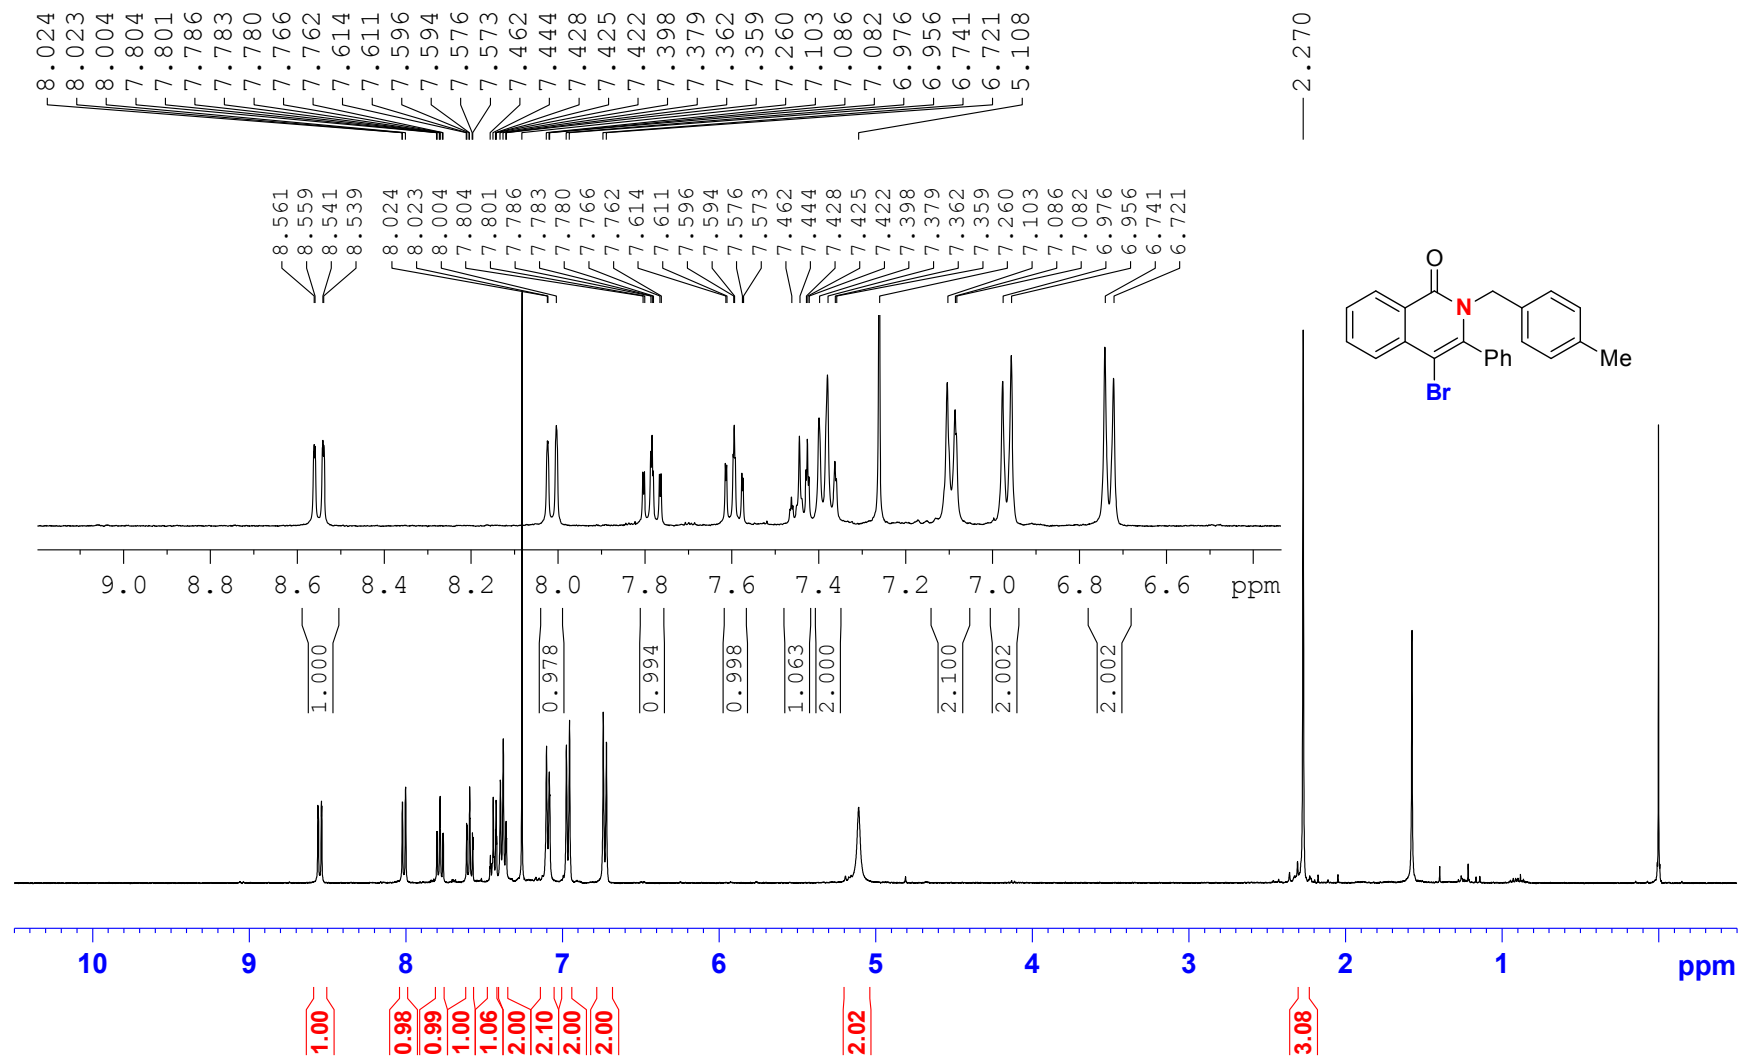



#### 4. $^1\text{H}$ and $^{13}\text{C}$ NMR spectrum of new compounds

$^{13}\text{C}$  NMR spectrum of **3ac** (100 MHz,  $\text{CDCl}_3$ )

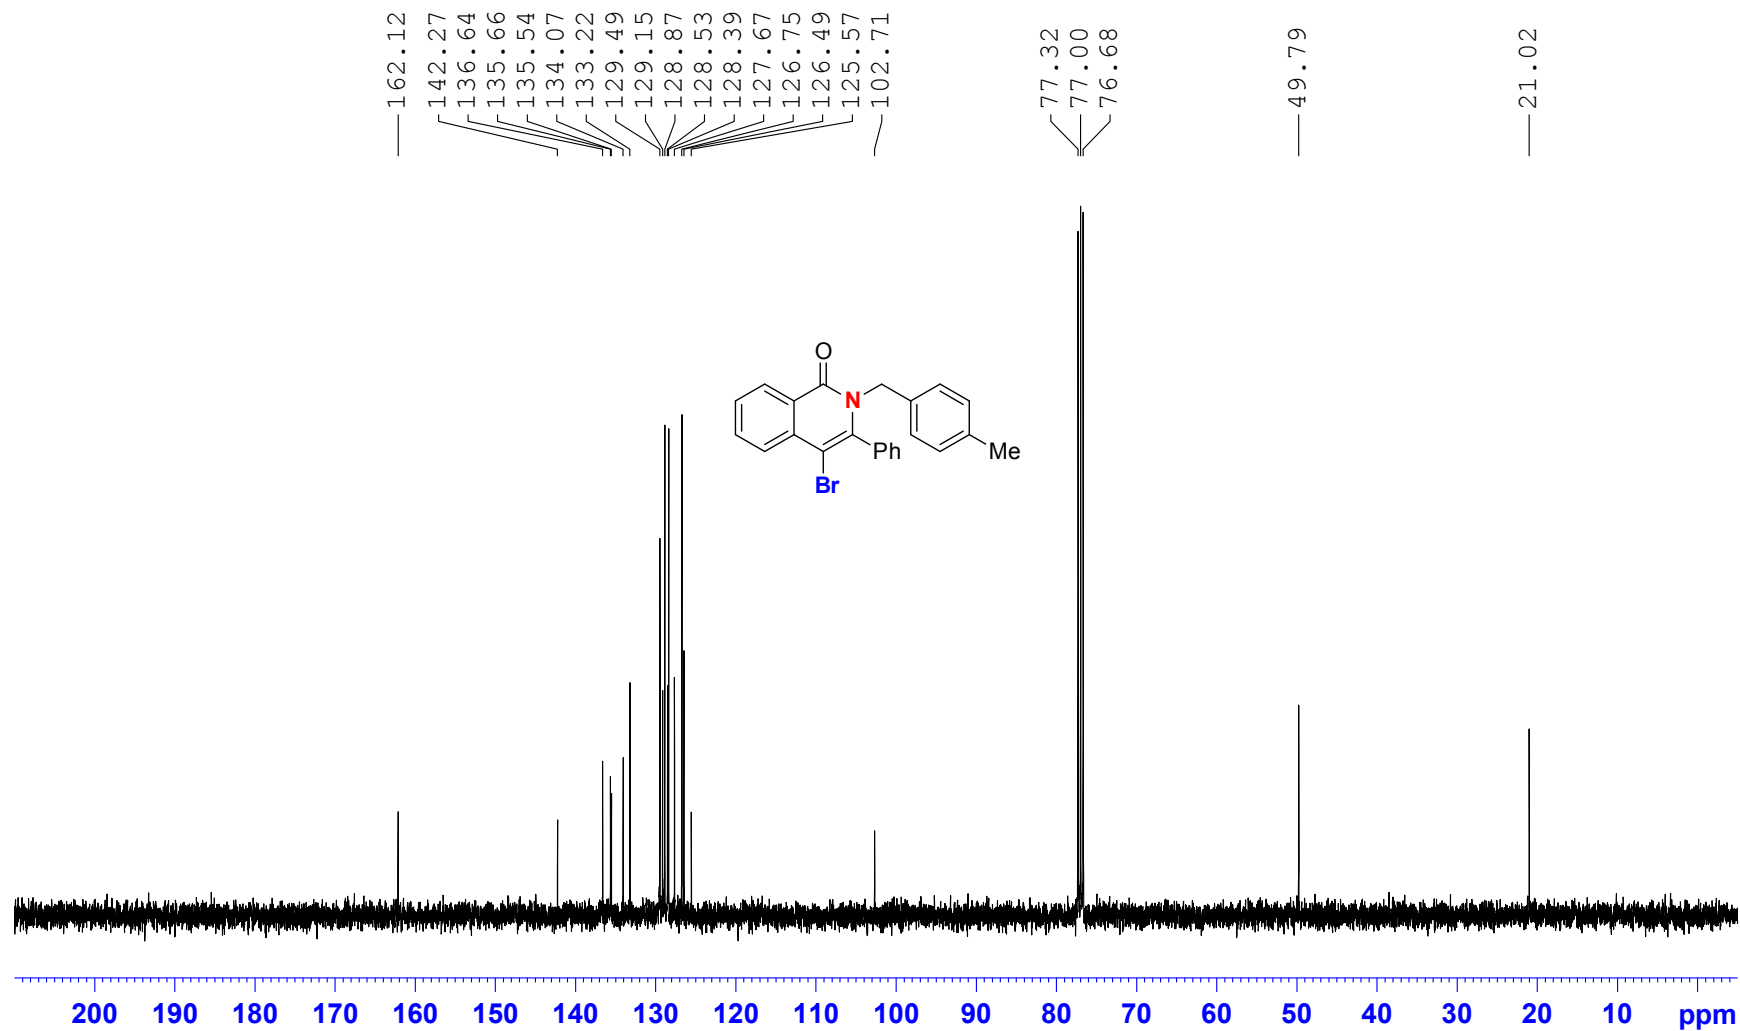

#### 4. $^1\text{H}$ and $^{13}\text{C}$ NMR spectrum of new compounds

$^1\text{H}$  NMR spectrum of **3ad** (400 MHz,  $\text{CDCl}_3$ )

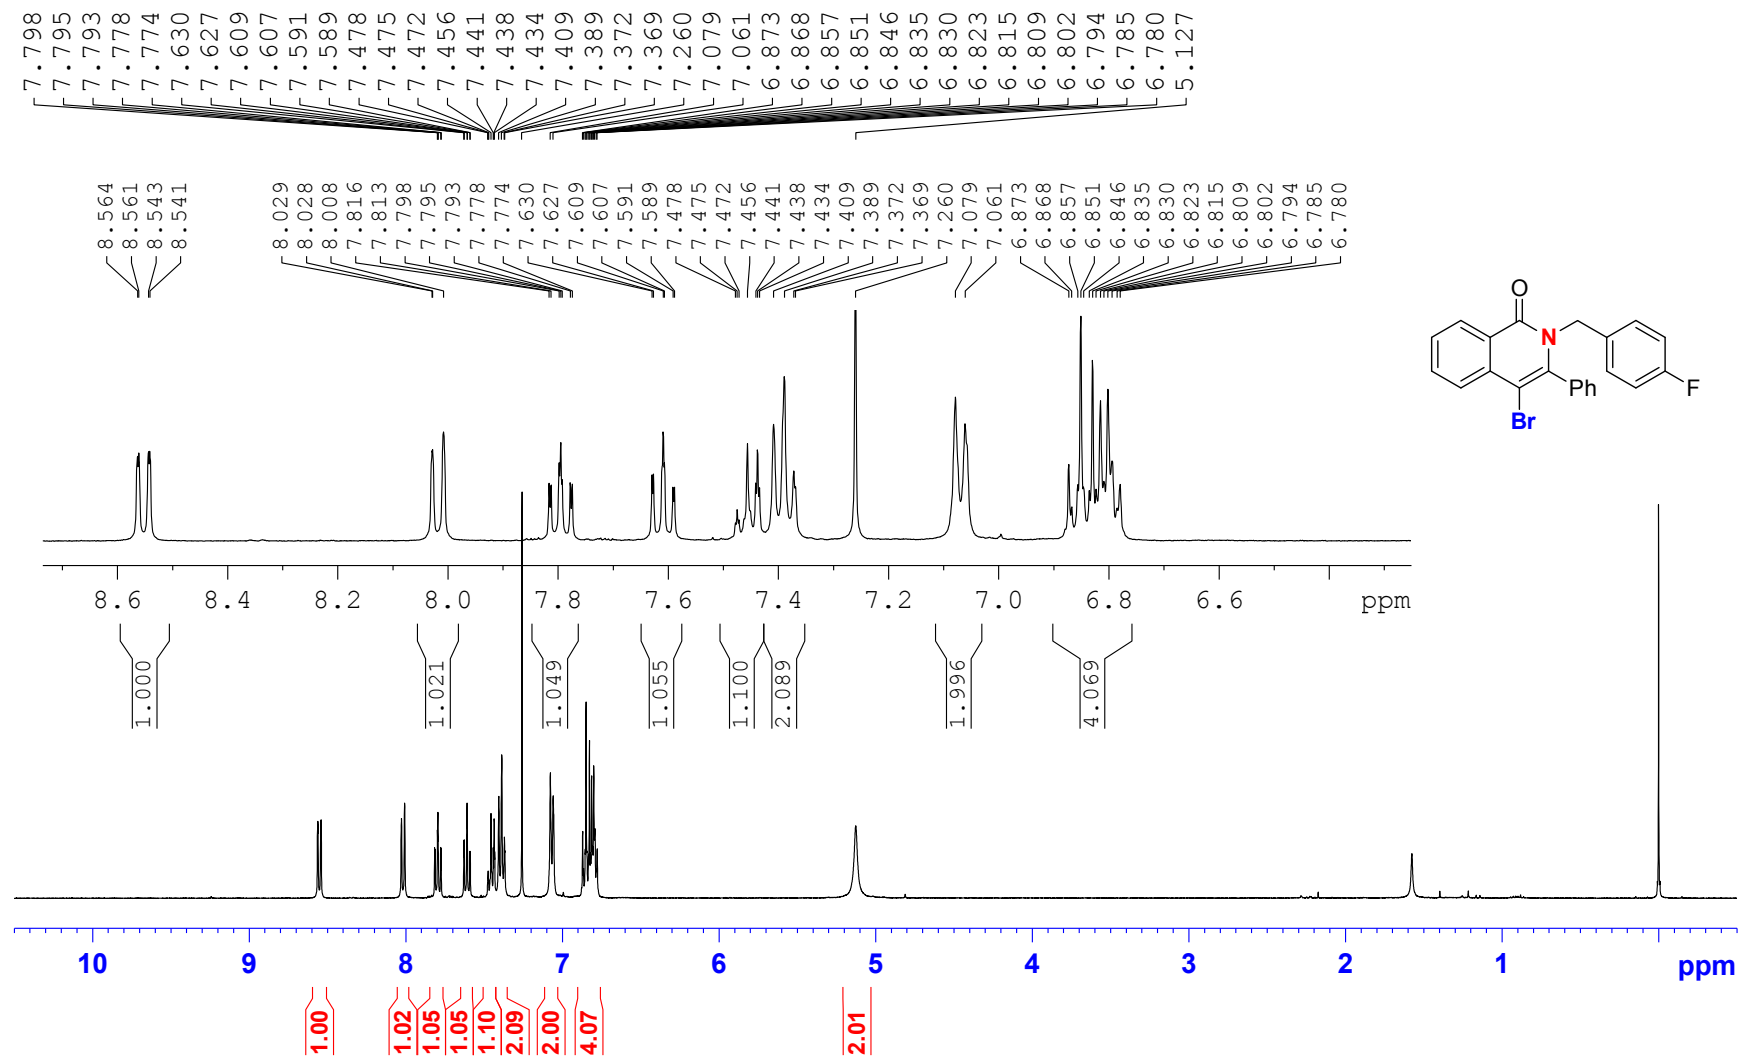

#### 4. $^1\text{H}$ and $^{13}\text{C}$ NMR spectrum of new compounds

$^{13}\text{C}$  NMR spectrum of **3ad** (100 MHz,  $\text{CDCl}_3$ )

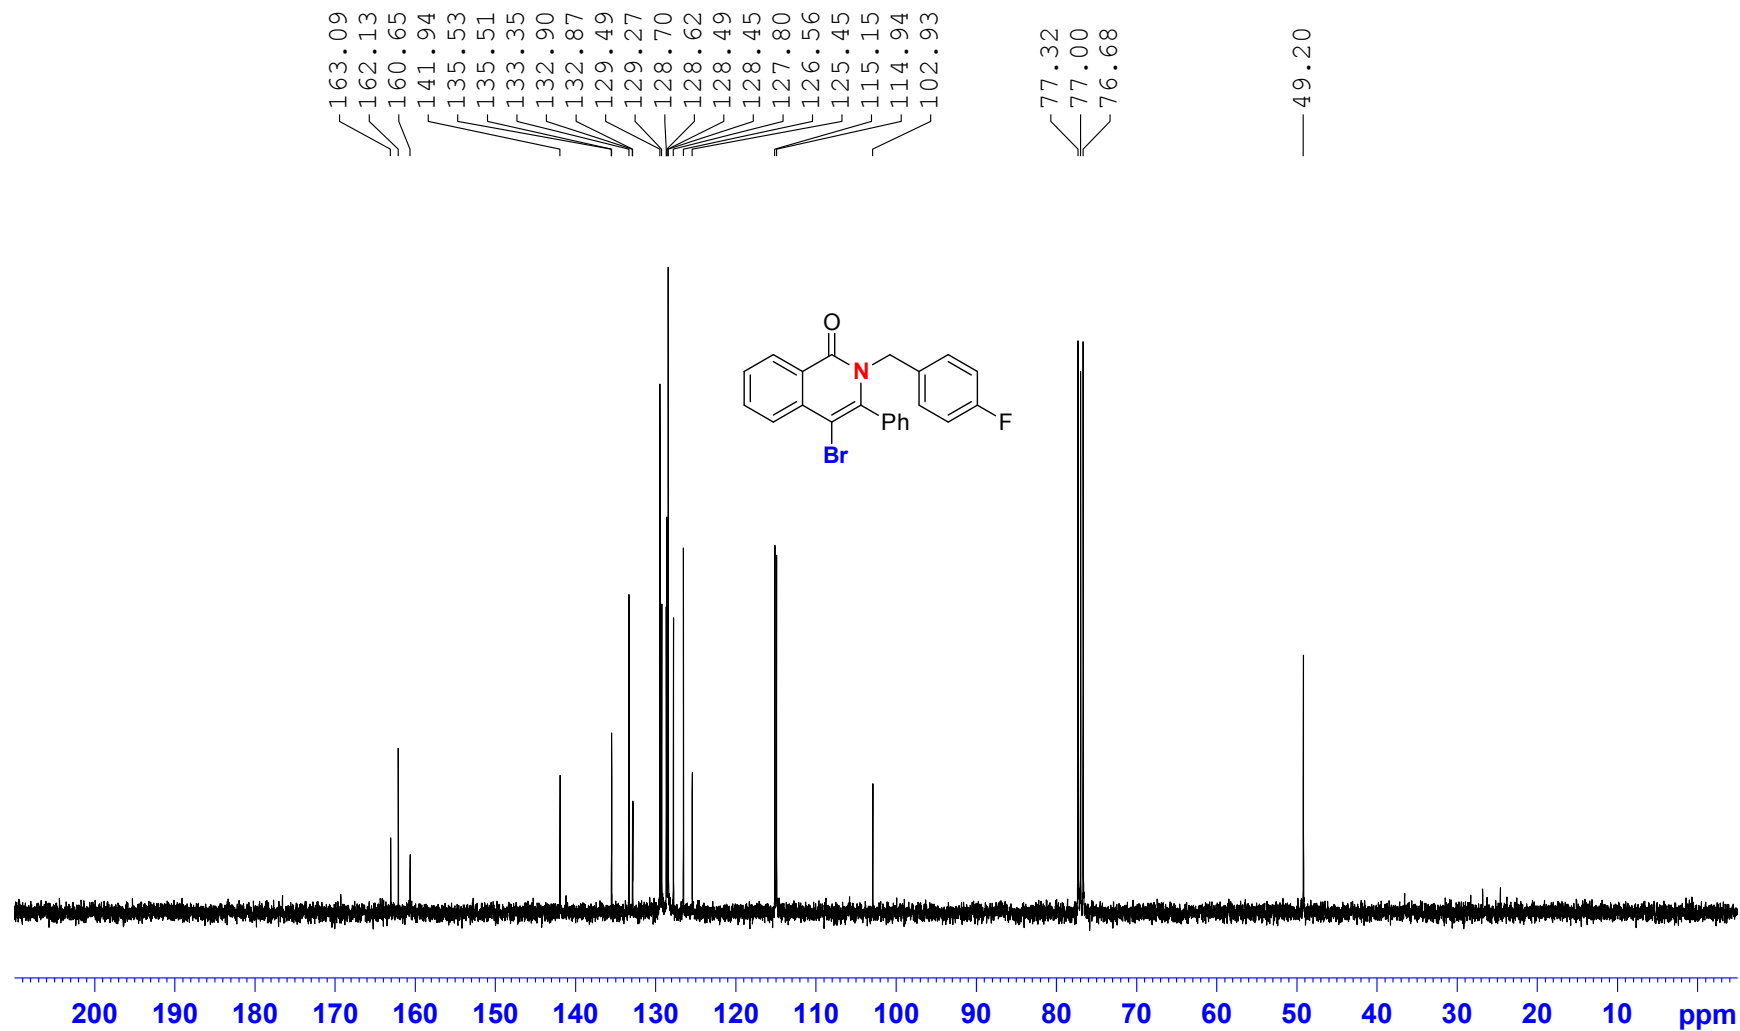

#### 4. $^1\text{H}$ and $^{13}\text{C}$ NMR spectrum of new compounds

$^1\text{H}$  NMR spectrum of **3ae** (400 MHz,  $\text{CDCl}_3$ )

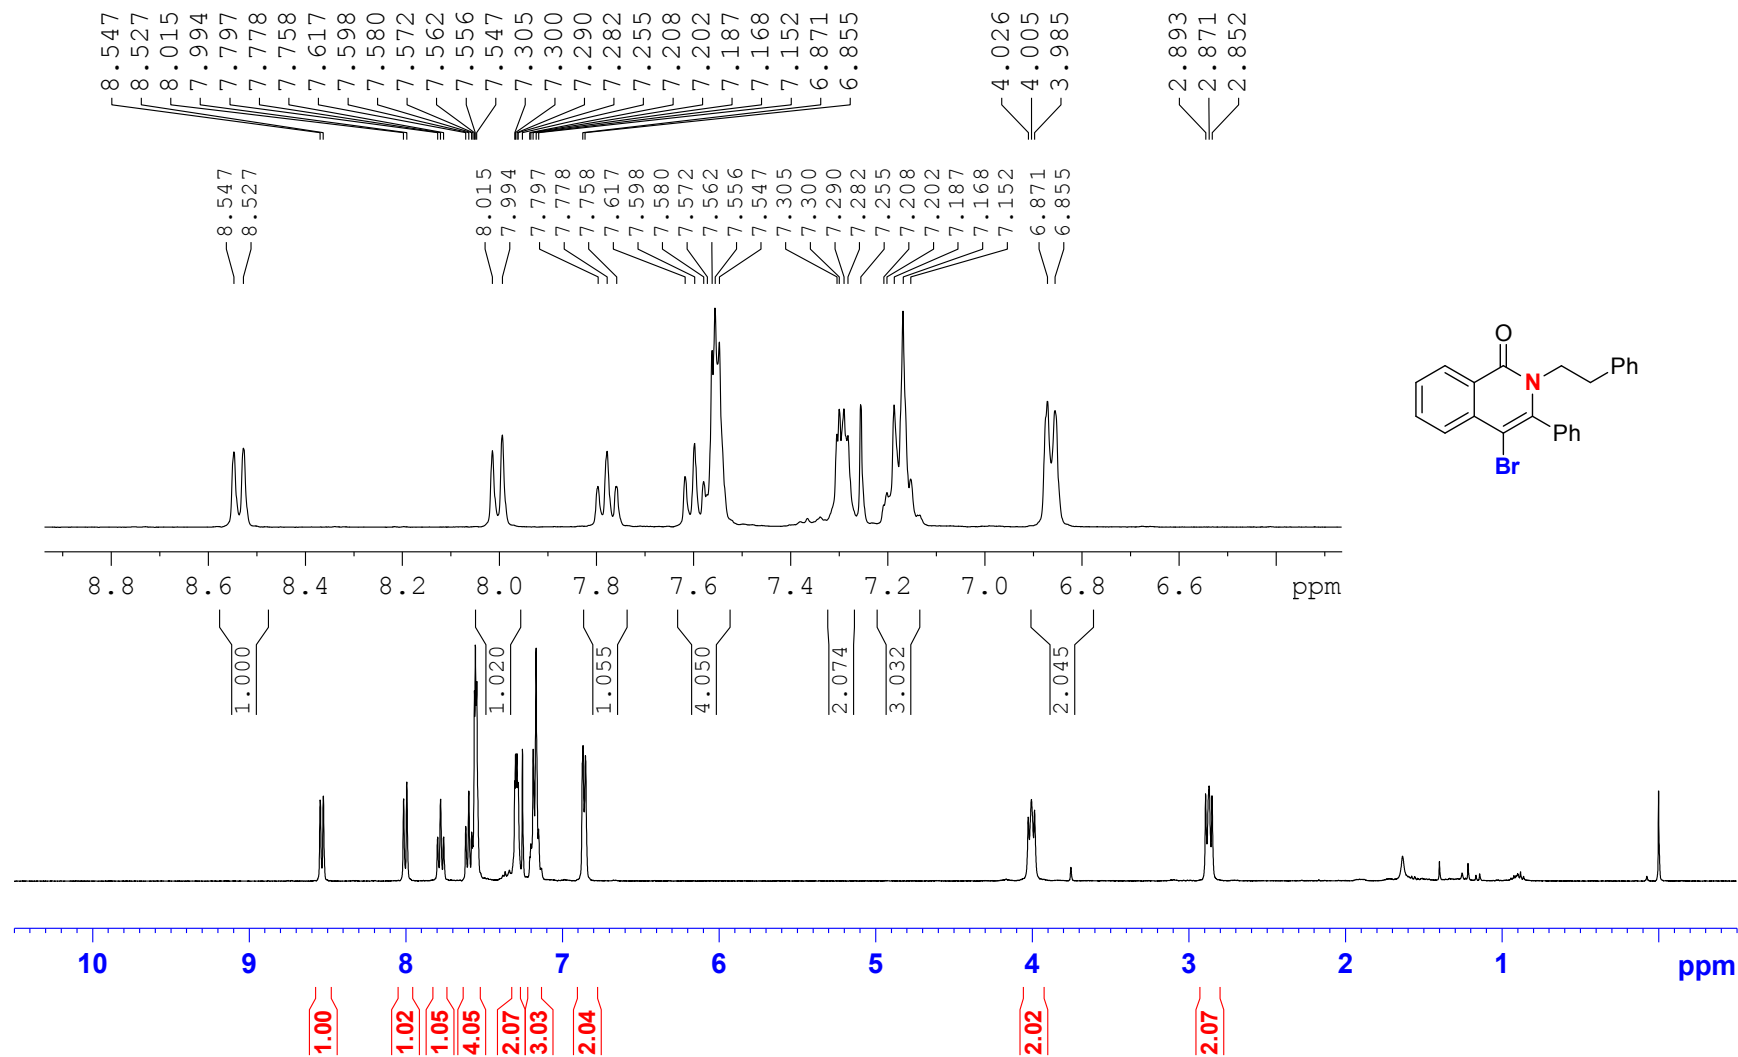

#### 4. $^1\text{H}$ and $^{13}\text{C}$ NMR spectrum of new compounds

$^{13}\text{C}$  NMR spectrum of **3ae** (100 MHz,  $\text{CDCl}_3$ )

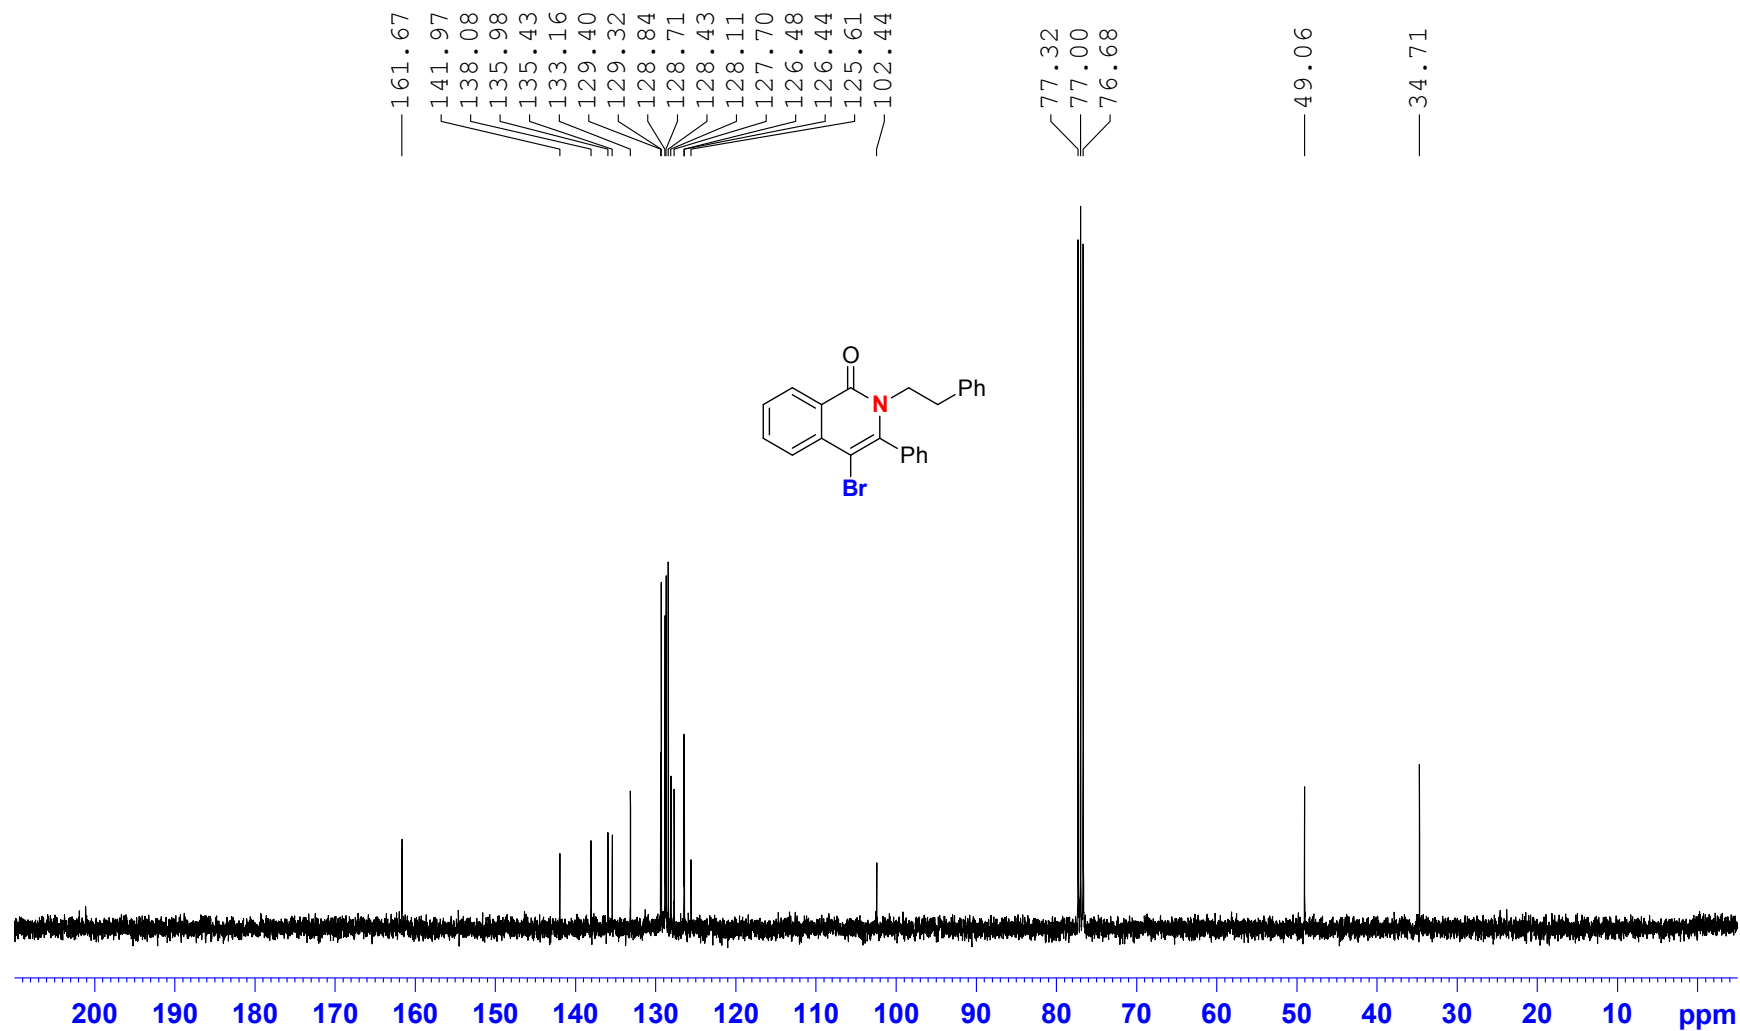

#### 4. $^1\text{H}$ and $^{13}\text{C}$ NMR spectrum of new compounds

$^1\text{H}$  NMR spectrum of **3af** (400 MHz,  $\text{CDCl}_3$ )

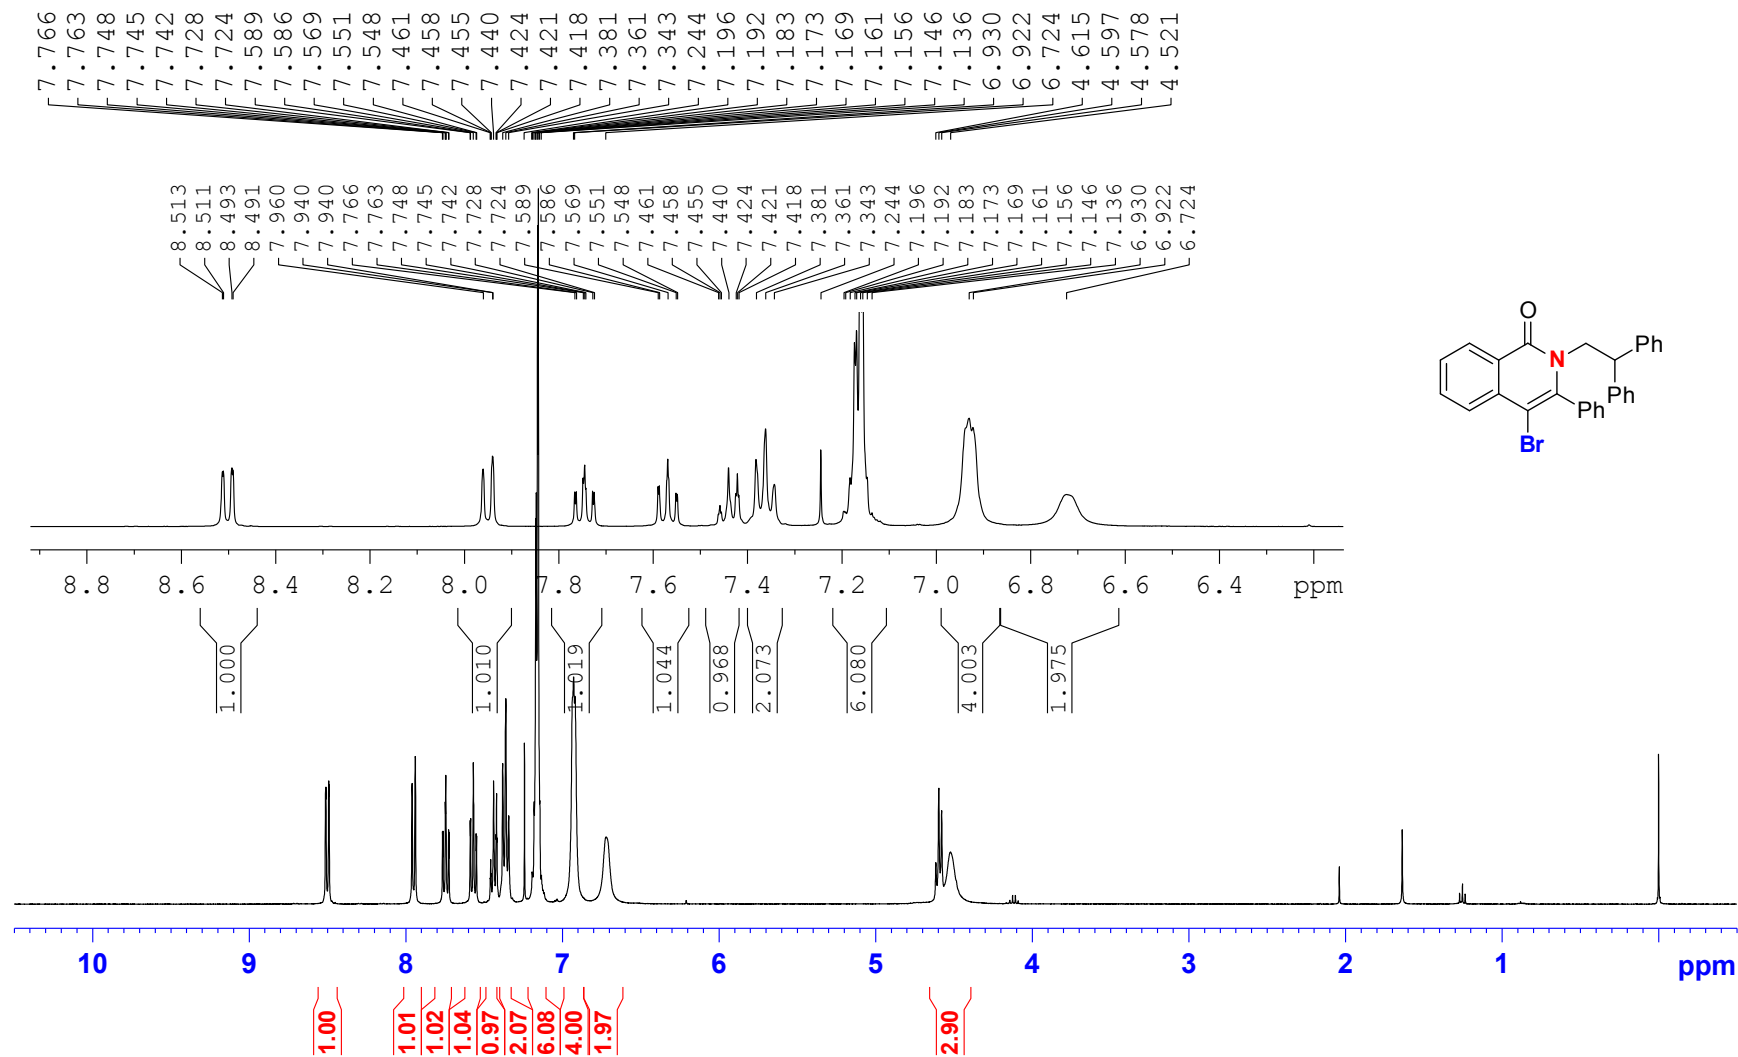

#### 4. $^1\text{H}$ and $^{13}\text{C}$ NMR spectrum of new compounds

$^{13}\text{C}$  NMR spectrum of **3af** (100 MHz,  $\text{CDCl}_3$ )

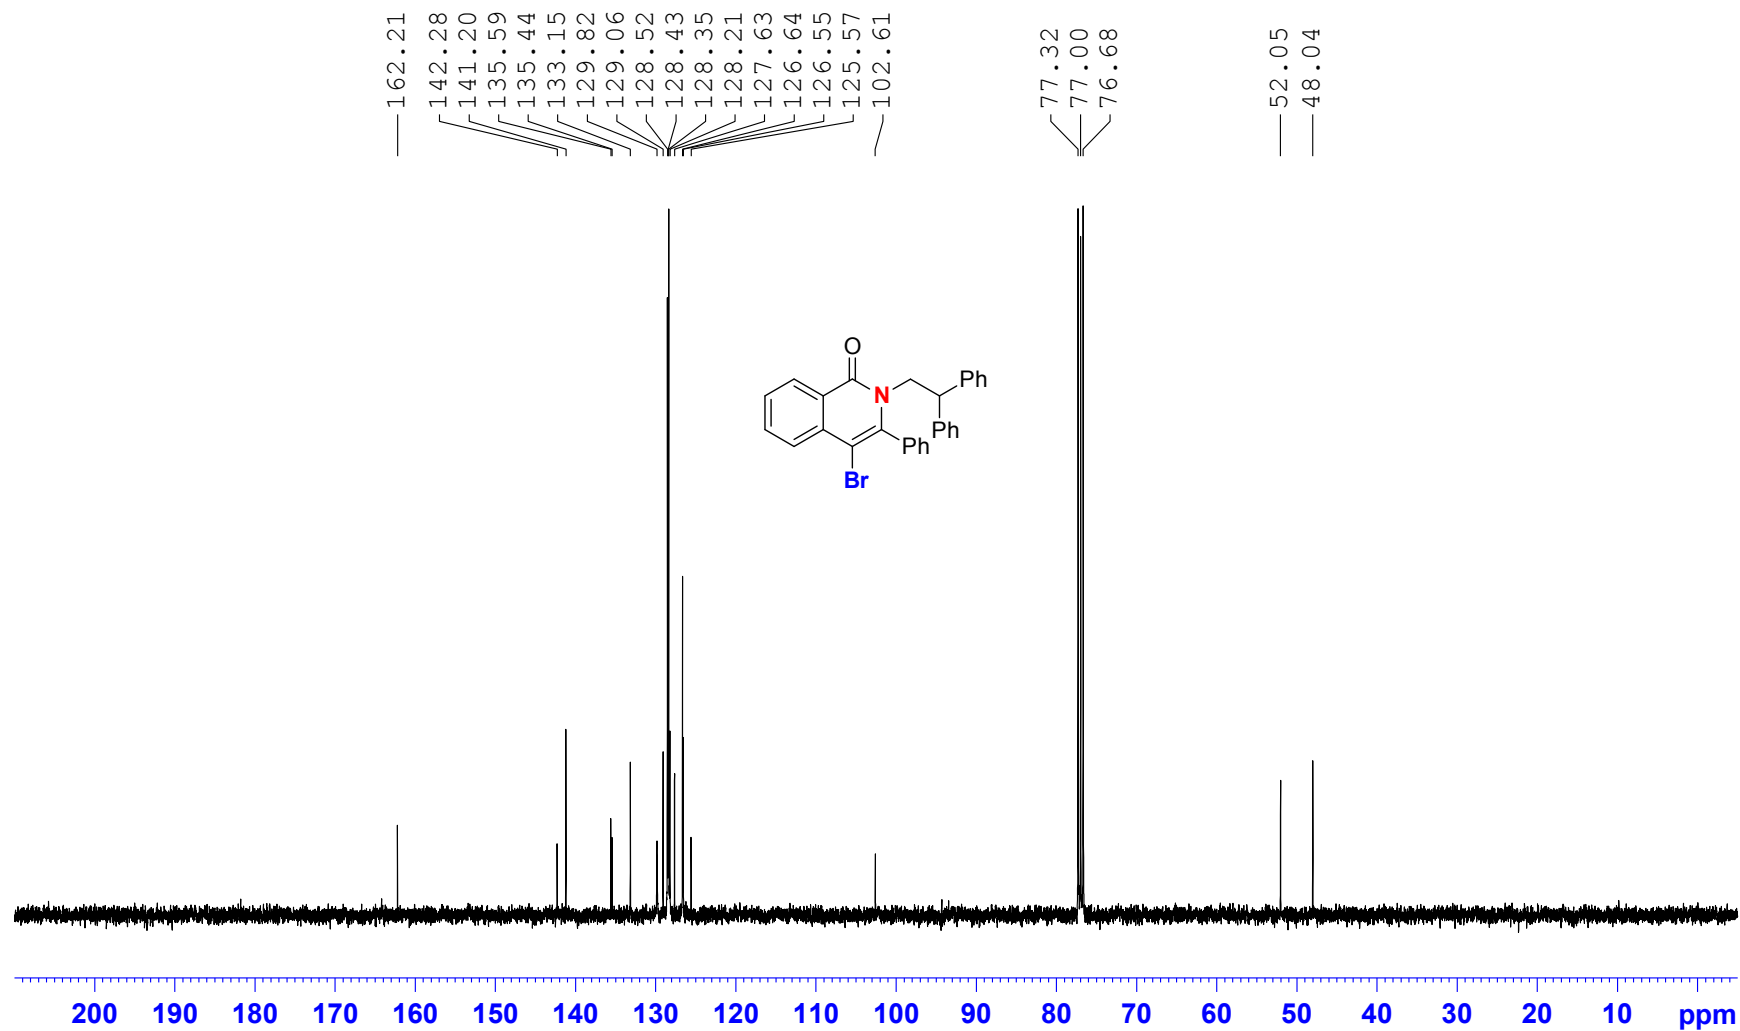

#### 4. $^1\text{H}$ and $^{13}\text{C}$ NMR spectrum of new compounds

$^1\text{H}$  NMR spectrum of **3ag** (400 MHz,  $\text{CDCl}_3$ )

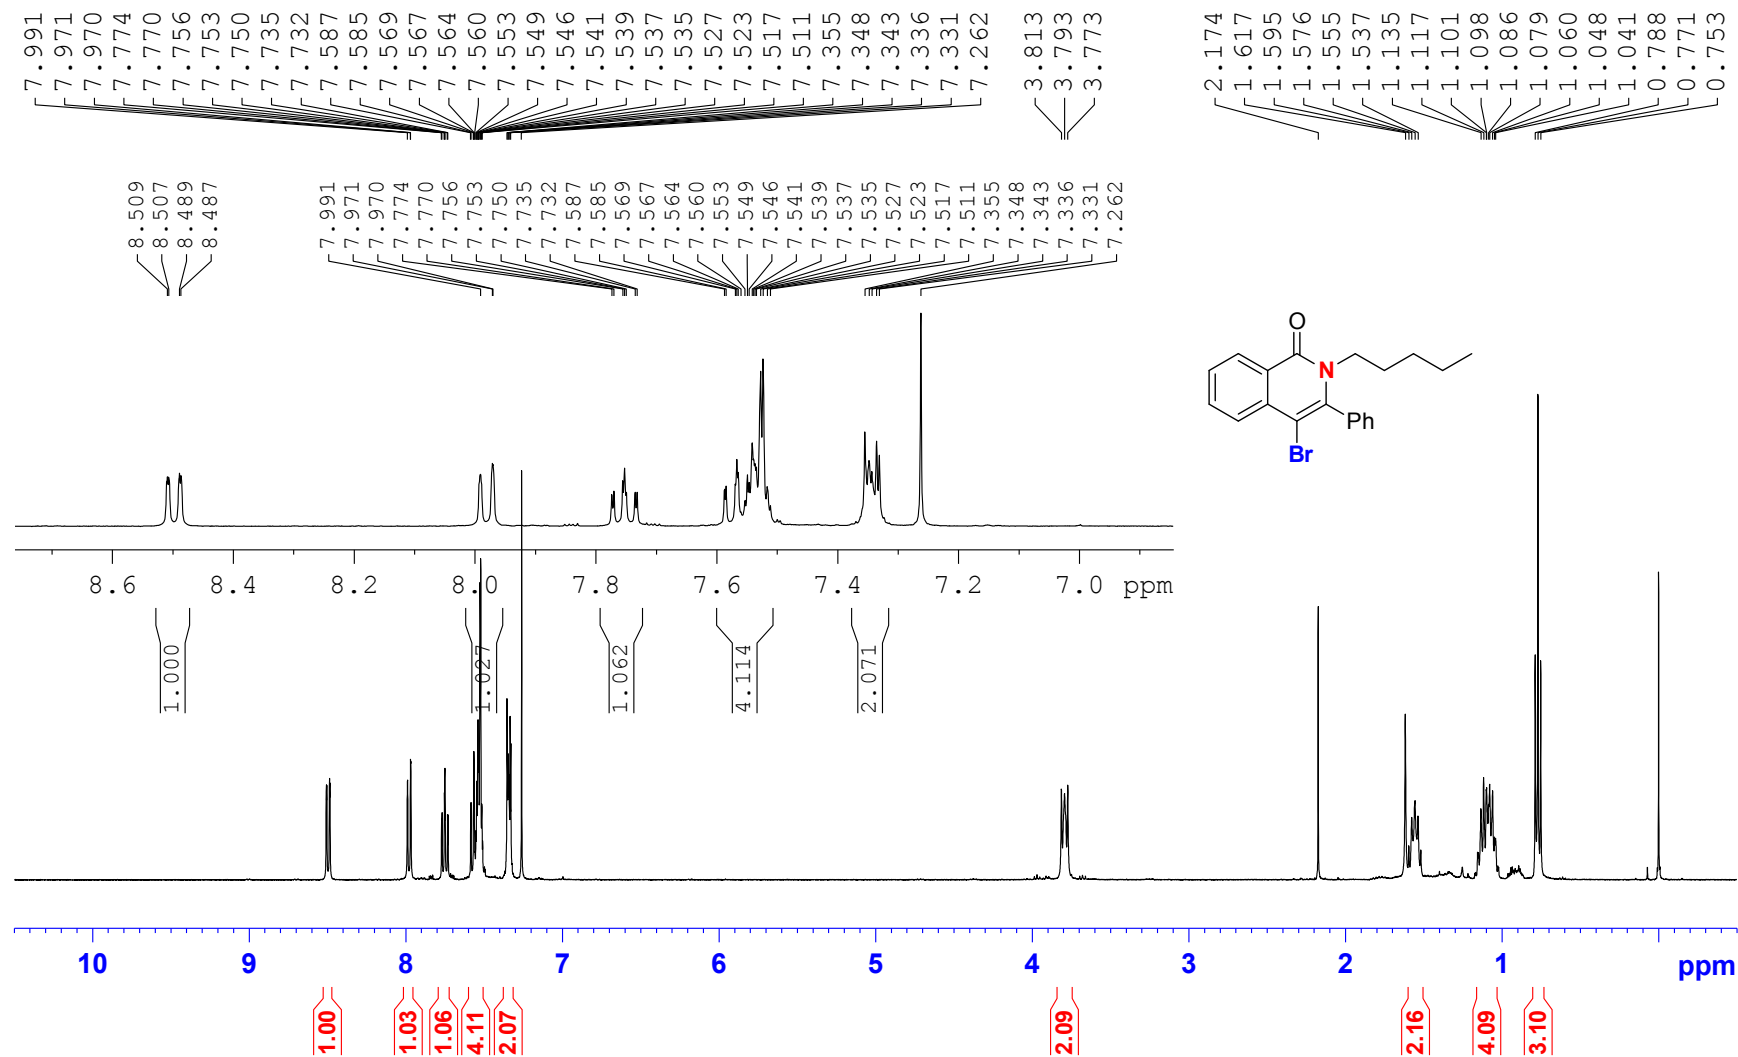



#### 4. $^1\text{H}$ and $^{13}\text{C}$ NMR spectrum of new compounds

$^{13}\text{C}$  NMR spectrum of **3ag** (100 MHz,  $\text{CDCl}_3$ )

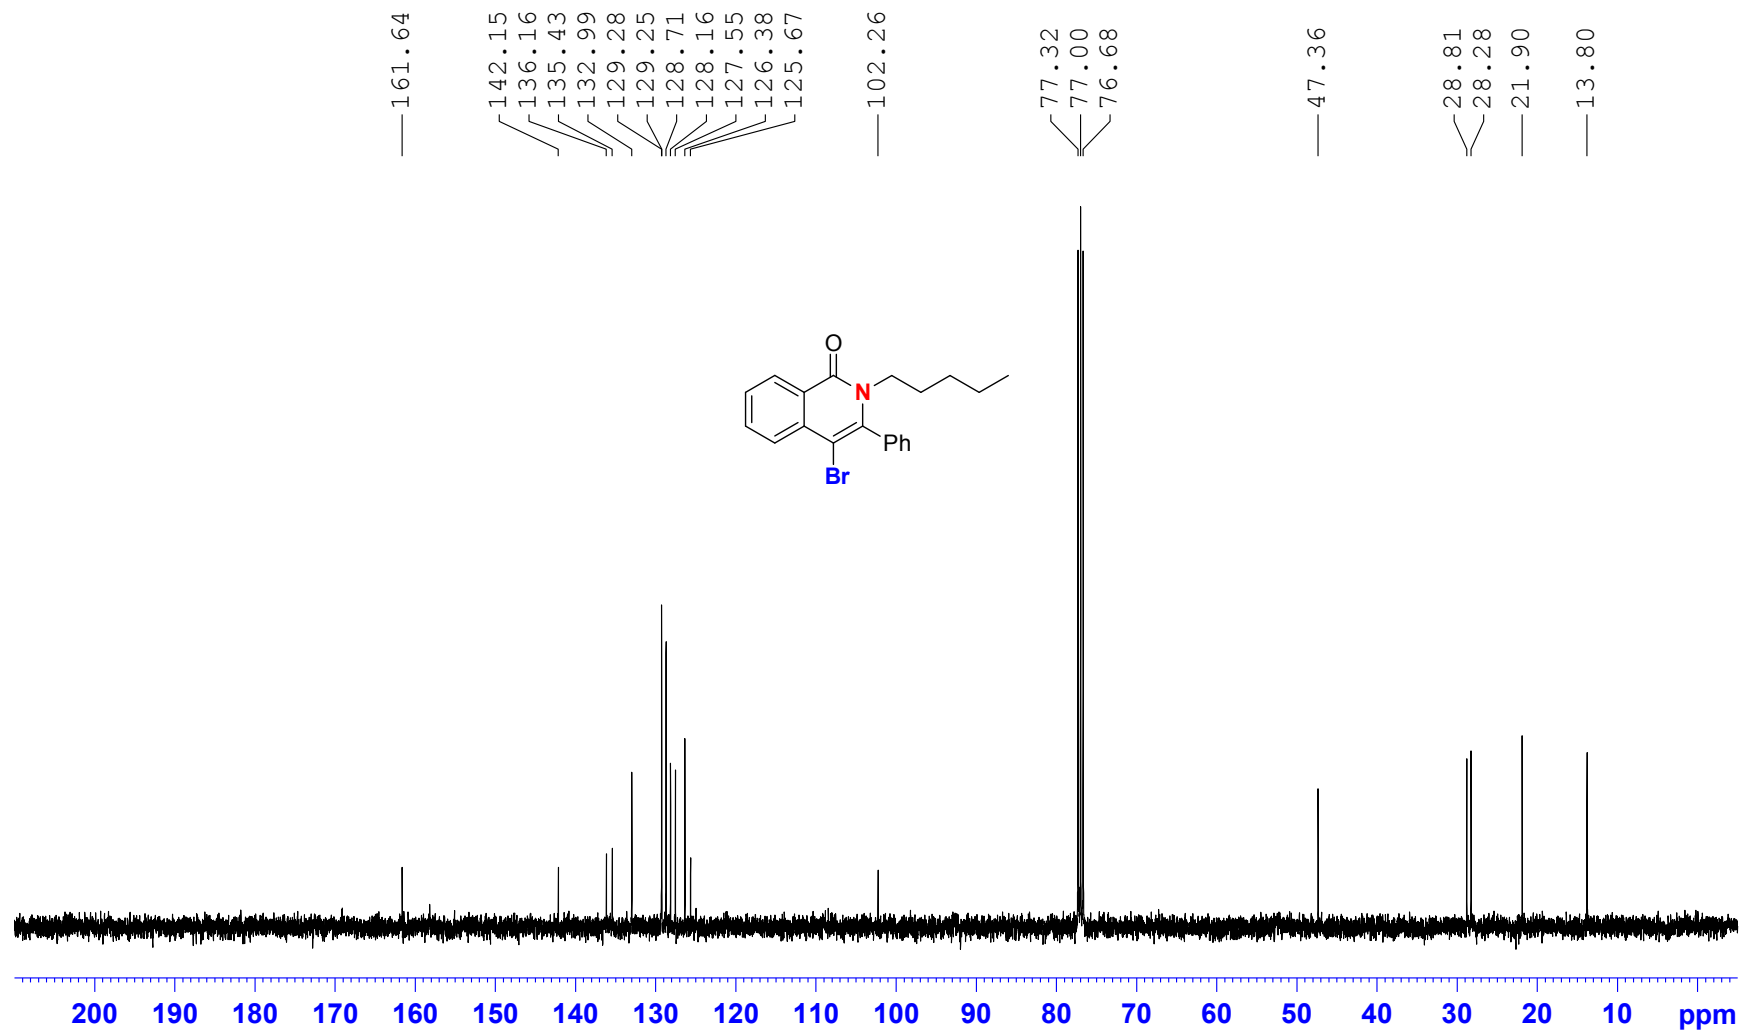

#### 4. $^1\text{H}$ and $^{13}\text{C}$ NMR spectrum of new compounds

$^1\text{H}$  NMR spectrum of **3ah** (400 MHz,  $\text{CDCl}_3$ )

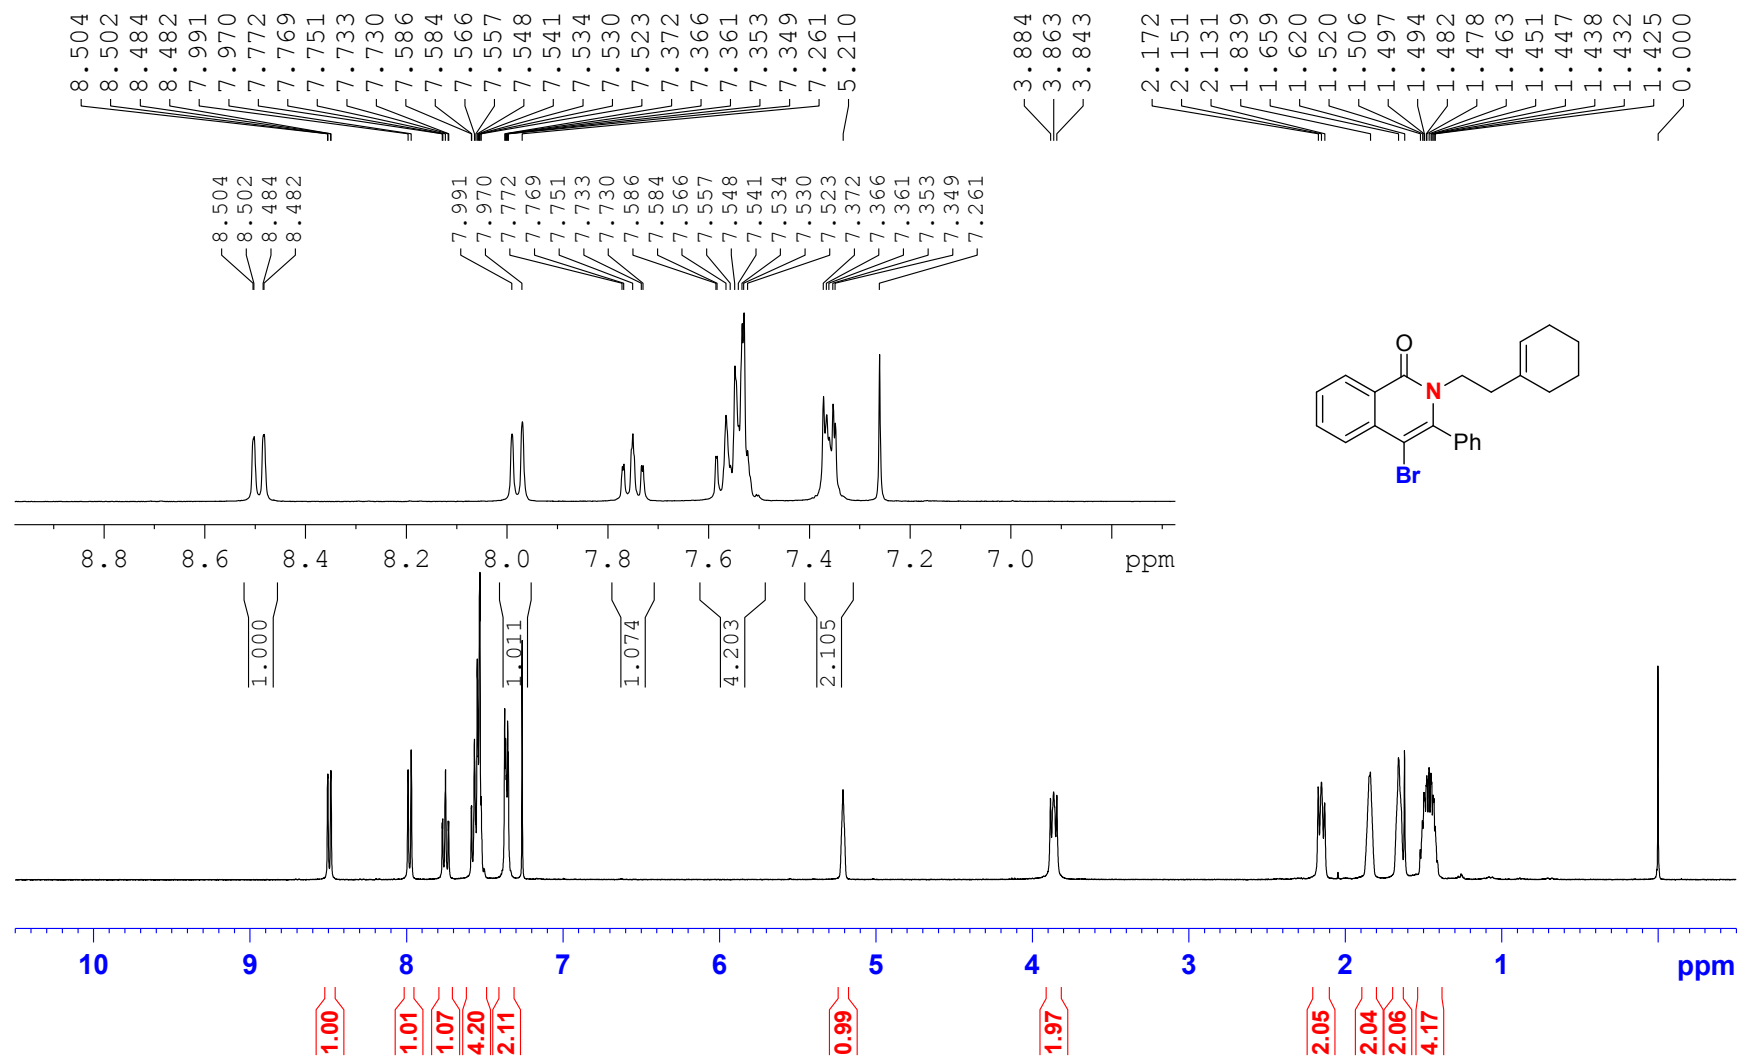

#### 4. $^1\text{H}$ and $^{13}\text{C}$ NMR spectrum of new compounds

$^{13}\text{C}$  NMR spectrum of **3ah** (100 MHz,  $\text{CDCl}_3$ )

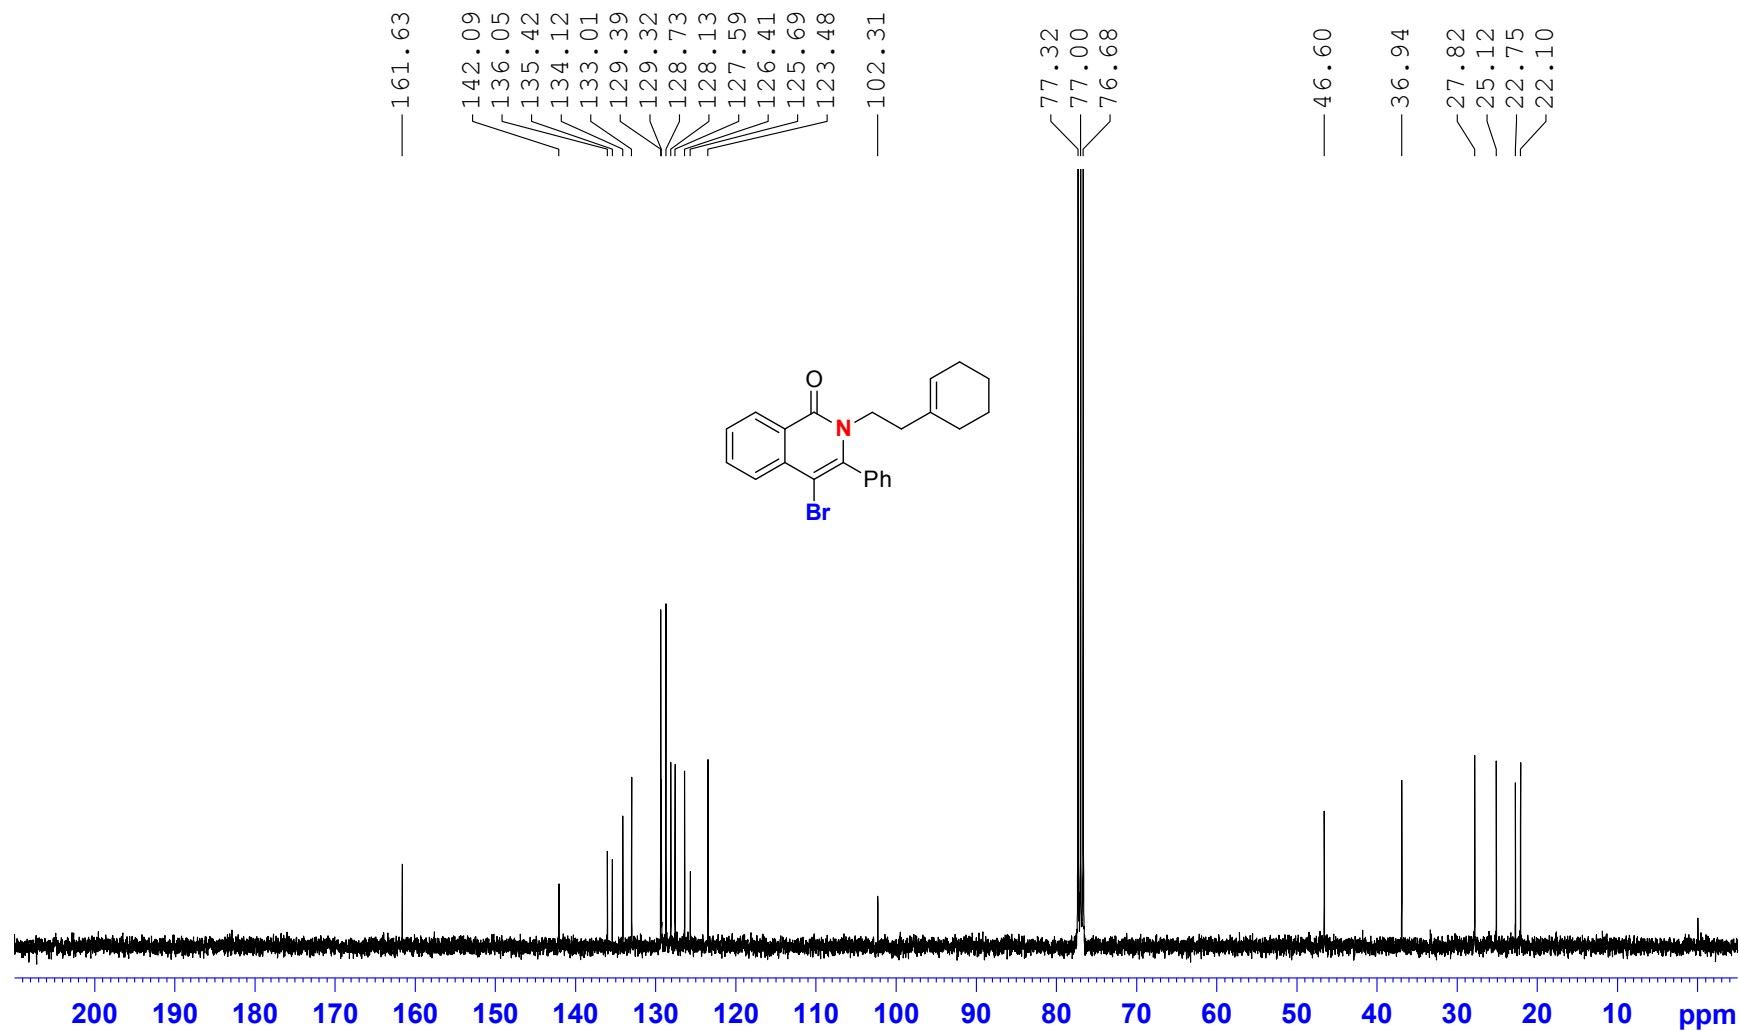

#### 4. $^1\text{H}$ and $^{13}\text{C}$ NMR spectrum of new compounds

$^1\text{H}$  NMR spectrum of **3ai** (400 MHz,  $\text{CDCl}_3$ )

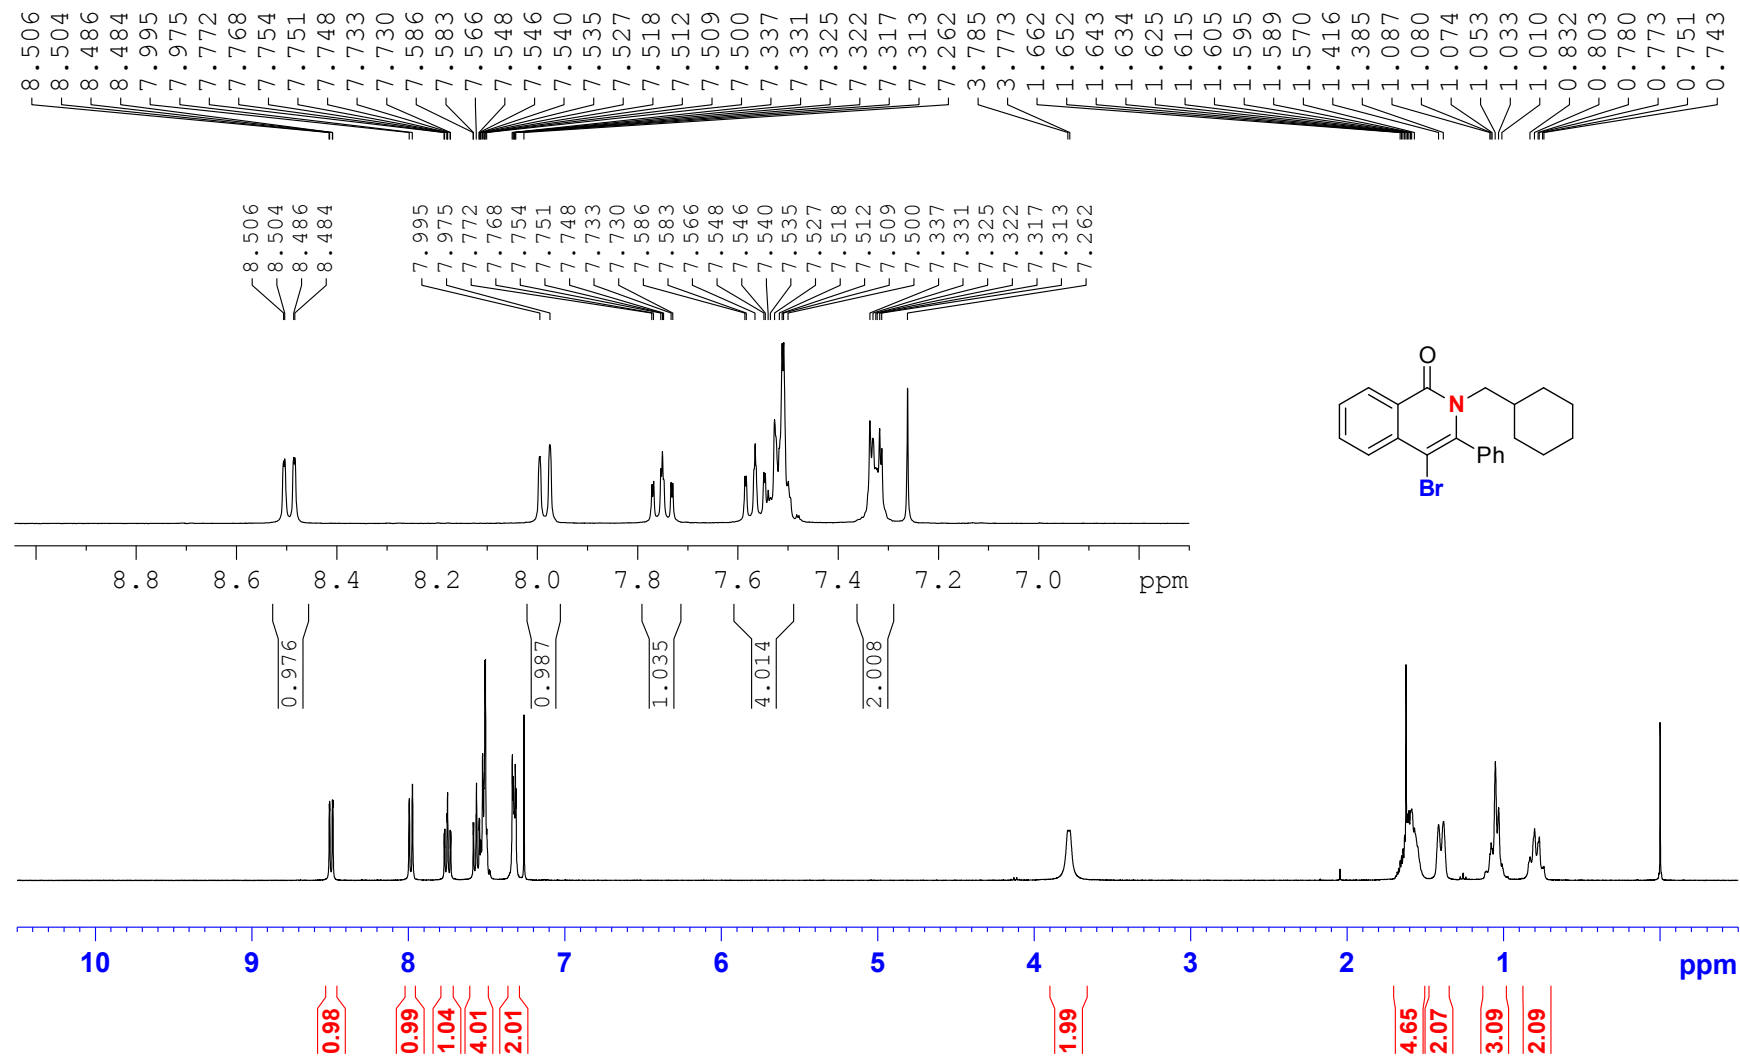

#### 4. $^1\text{H}$ and $^{13}\text{C}$ NMR spectrum of new compounds

$^{13}\text{C}$  NMR spectrum of **3ai** (100 MHz,  $\text{CDCl}_3$ )

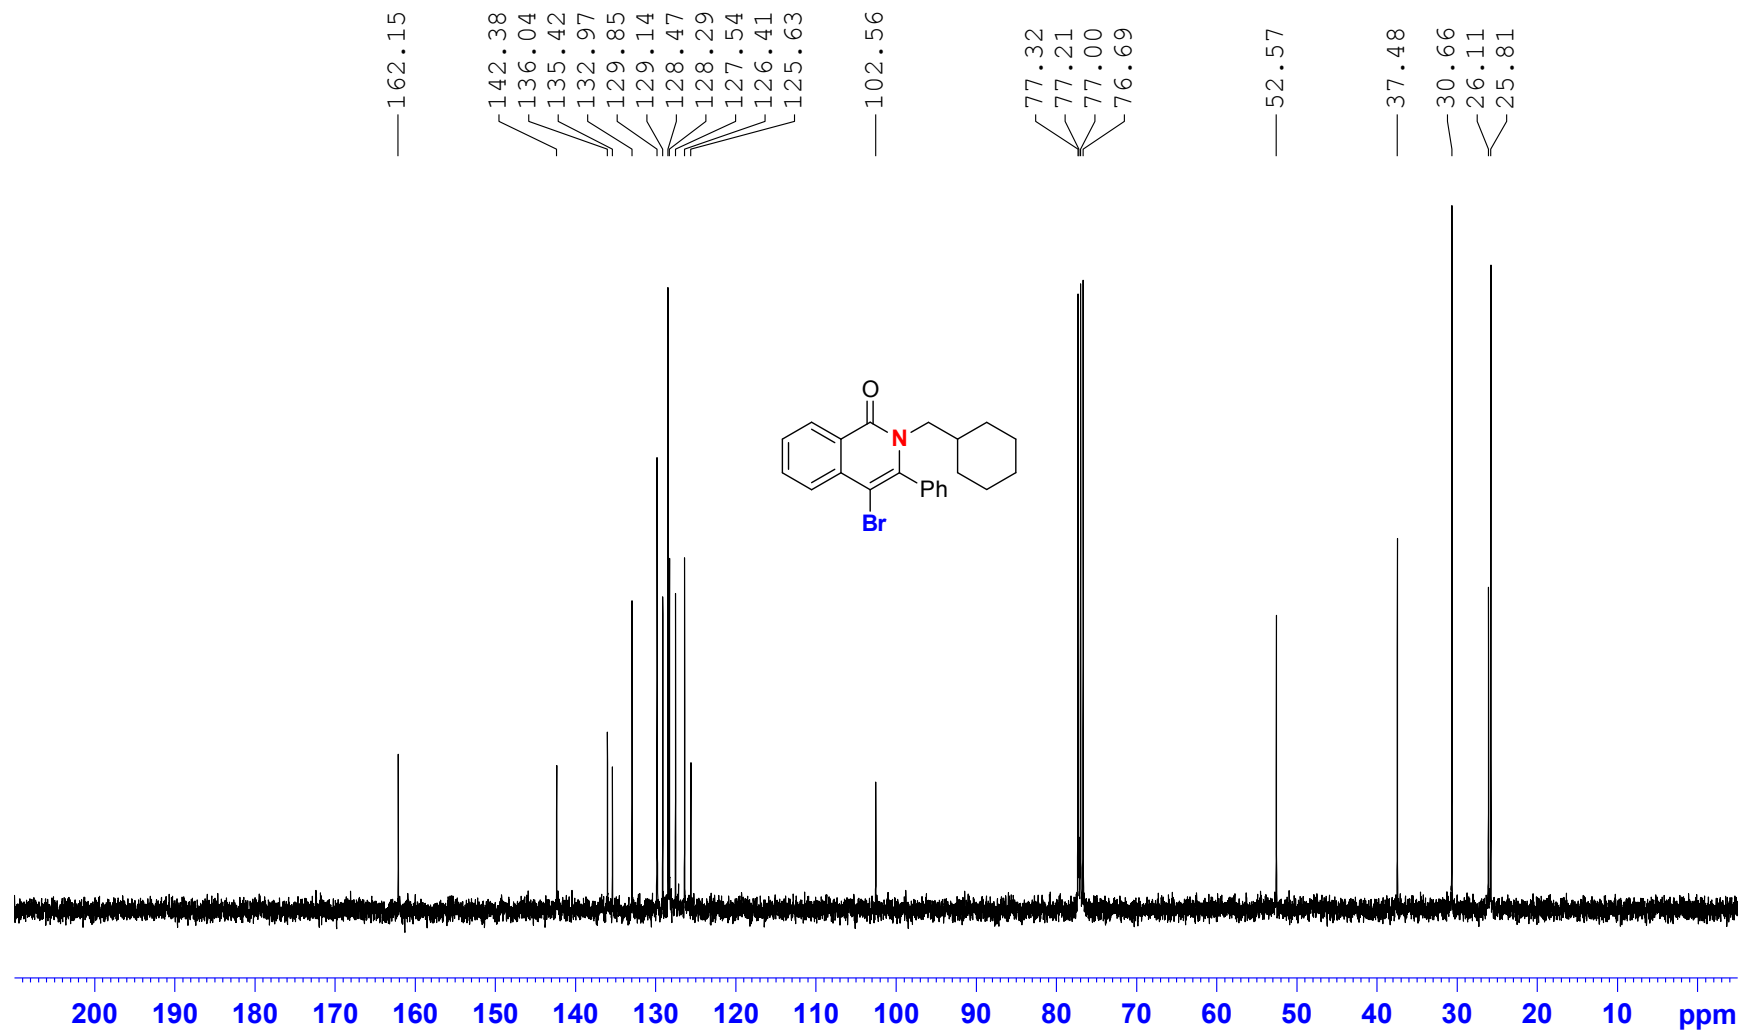

#### 4. $^1\text{H}$ and $^{13}\text{C}$ NMR spectrum of new compounds

$^1\text{H}$  NMR spectrum of **3aj** (400 MHz,  $\text{CDCl}_3$ )

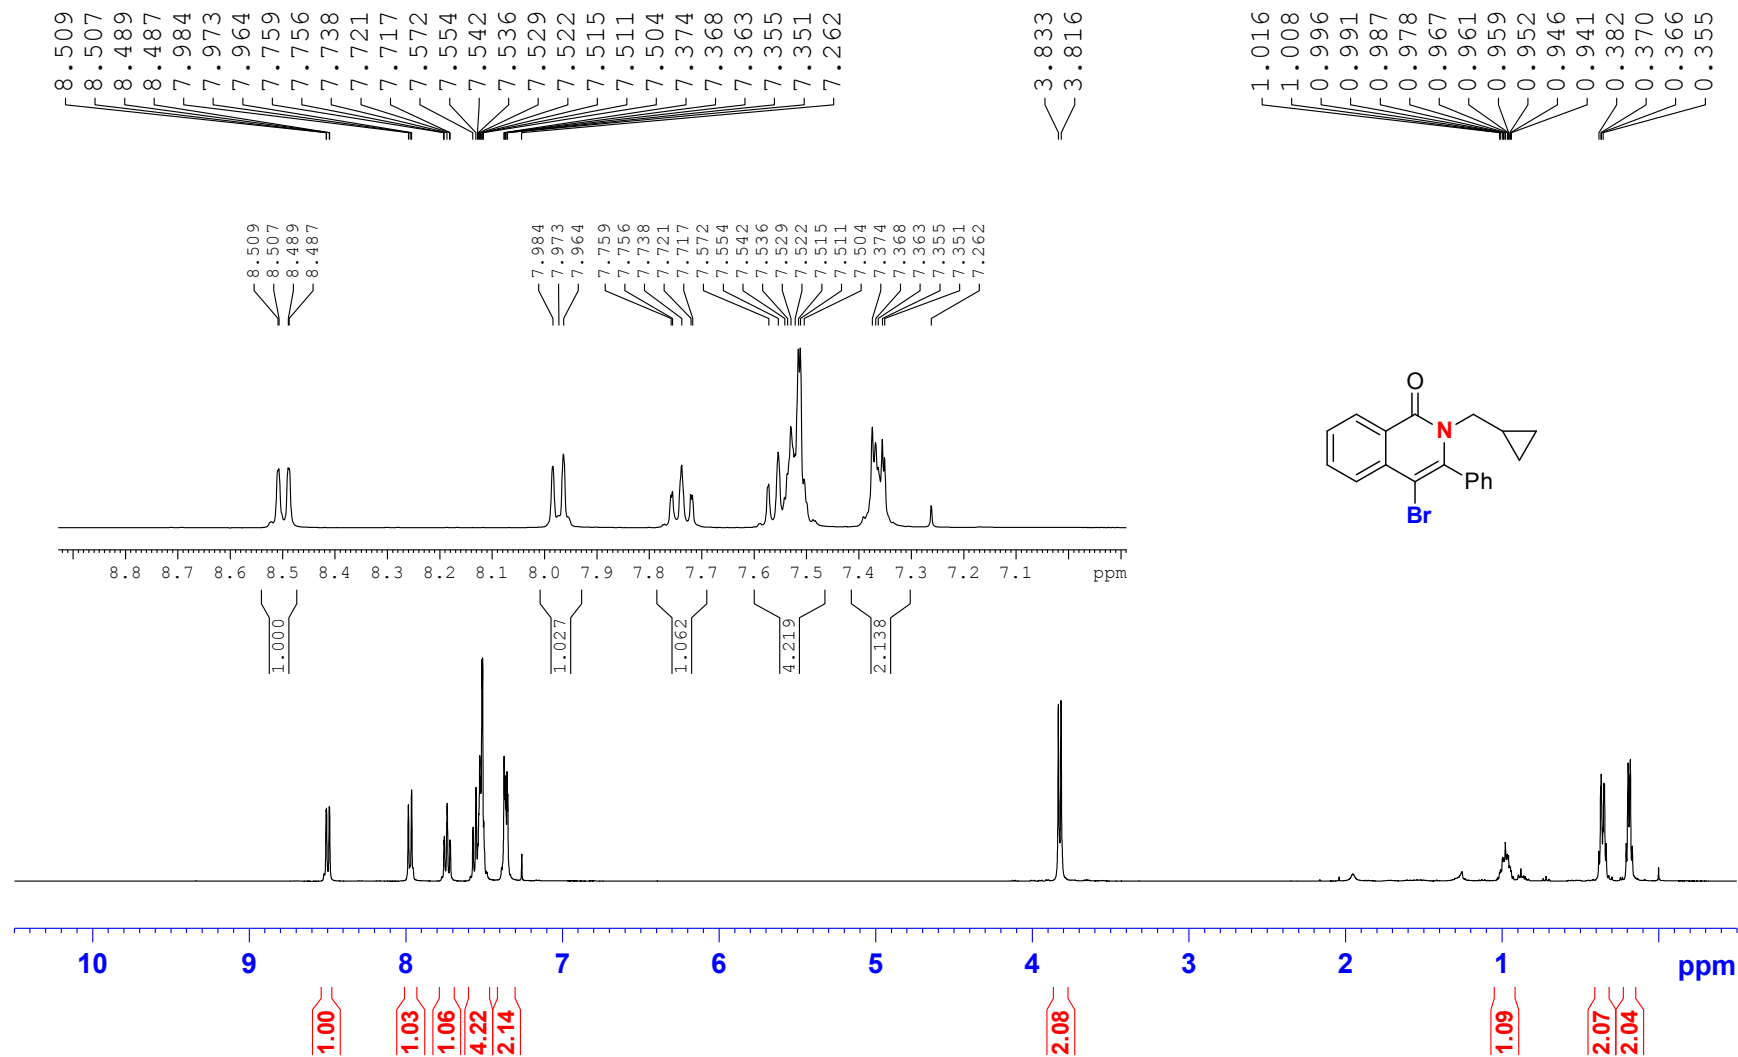

#### 4. $^1\text{H}$ and $^{13}\text{C}$ NMR spectrum of new compounds

$^{13}\text{C}$  NMR spectrum of **3aj** (100 MHz,  $\text{CDCl}_3$ )

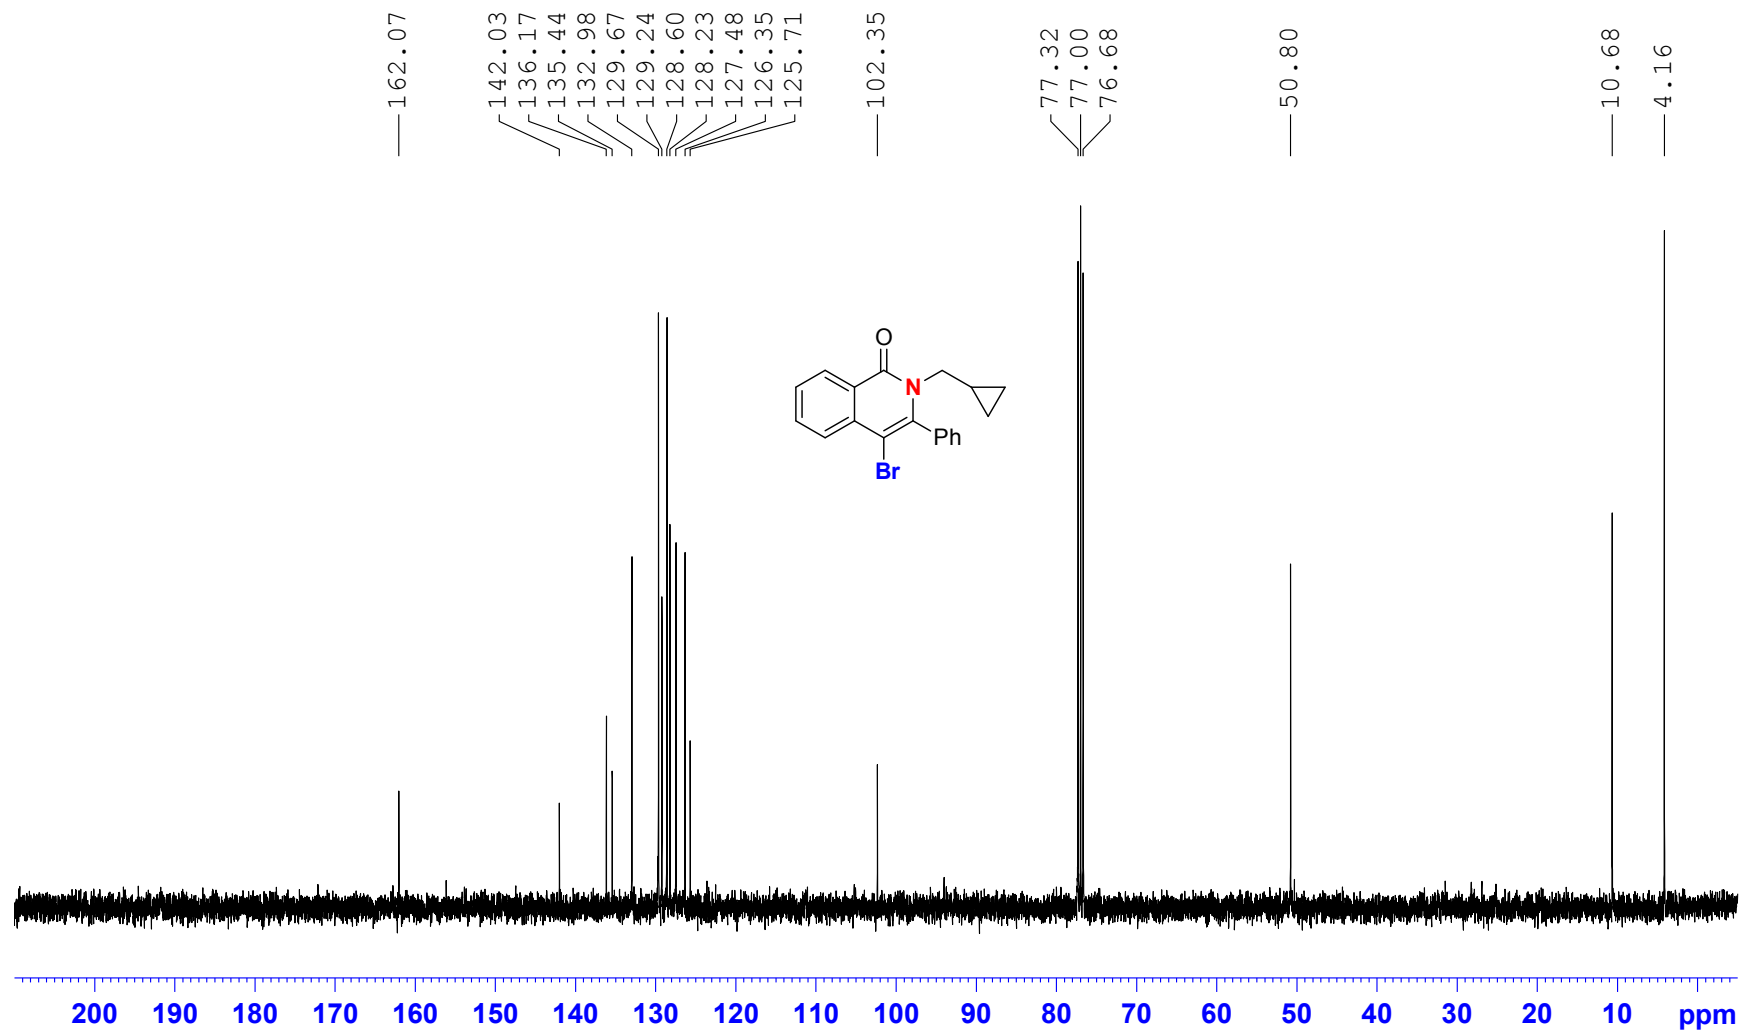

#### 4. $^1\text{H}$ and $^{13}\text{C}$ NMR spectrum of new compounds

$^1\text{H}$  NMR spectrum of **3ak** (400 MHz,  $\text{CDCl}_3$ )

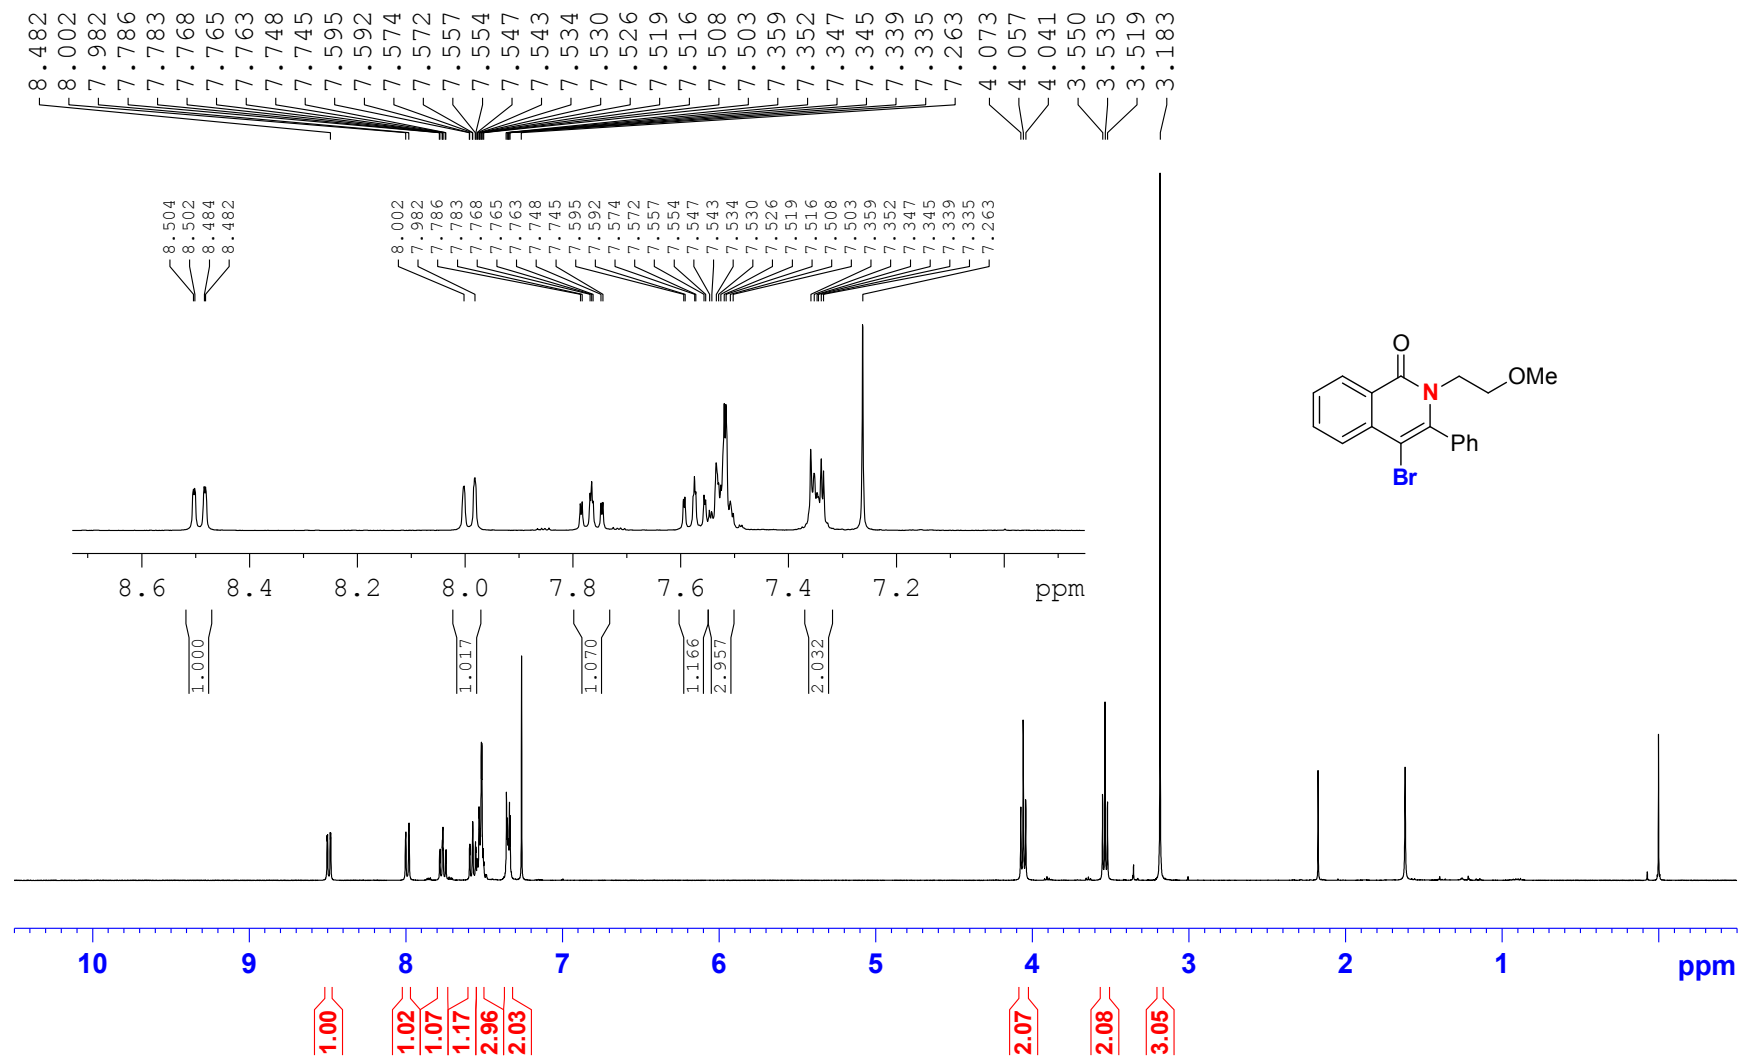



#### 4. $^1\text{H}$ and $^{13}\text{C}$ NMR spectrum of new compounds

$^{13}\text{C}$  NMR spectrum of **3ak** (100 MHz,  $\text{CDCl}_3$ )

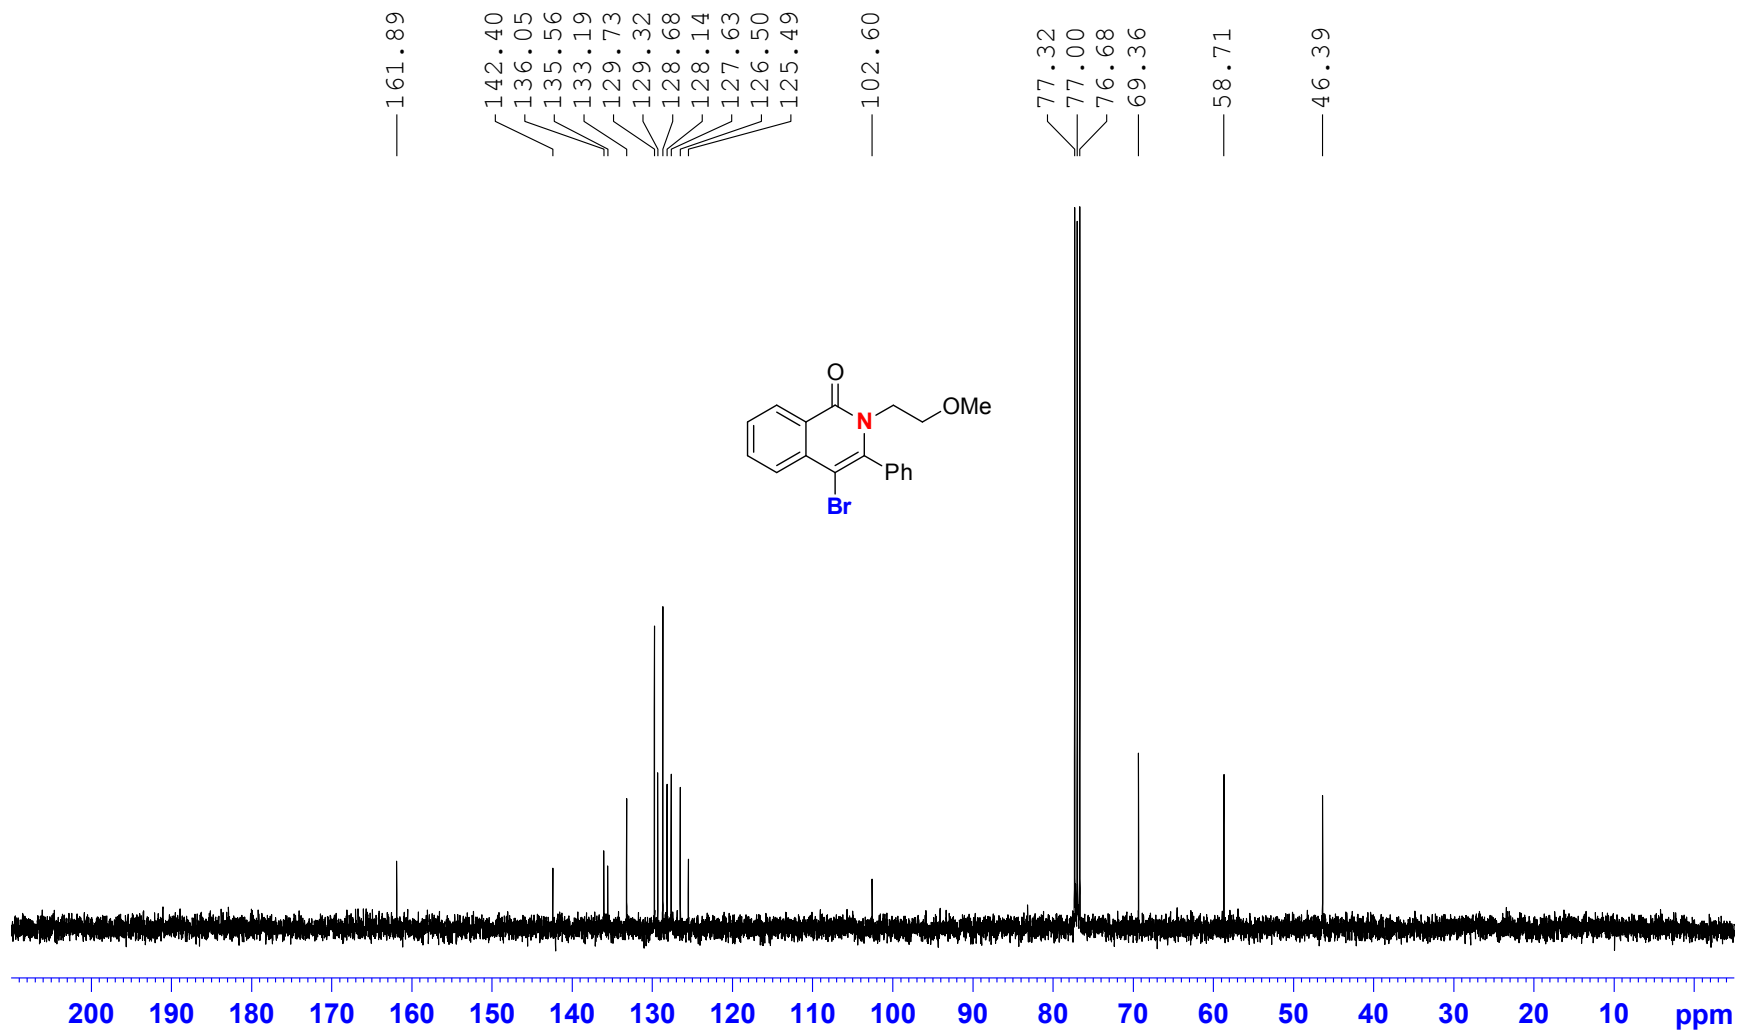

#### 4. $^1\text{H}$ and $^{13}\text{C}$ NMR spectrum of new compounds

$^1\text{H}$  NMR spectrum of **3al** (400 MHz,  $\text{CDCl}_3$ )

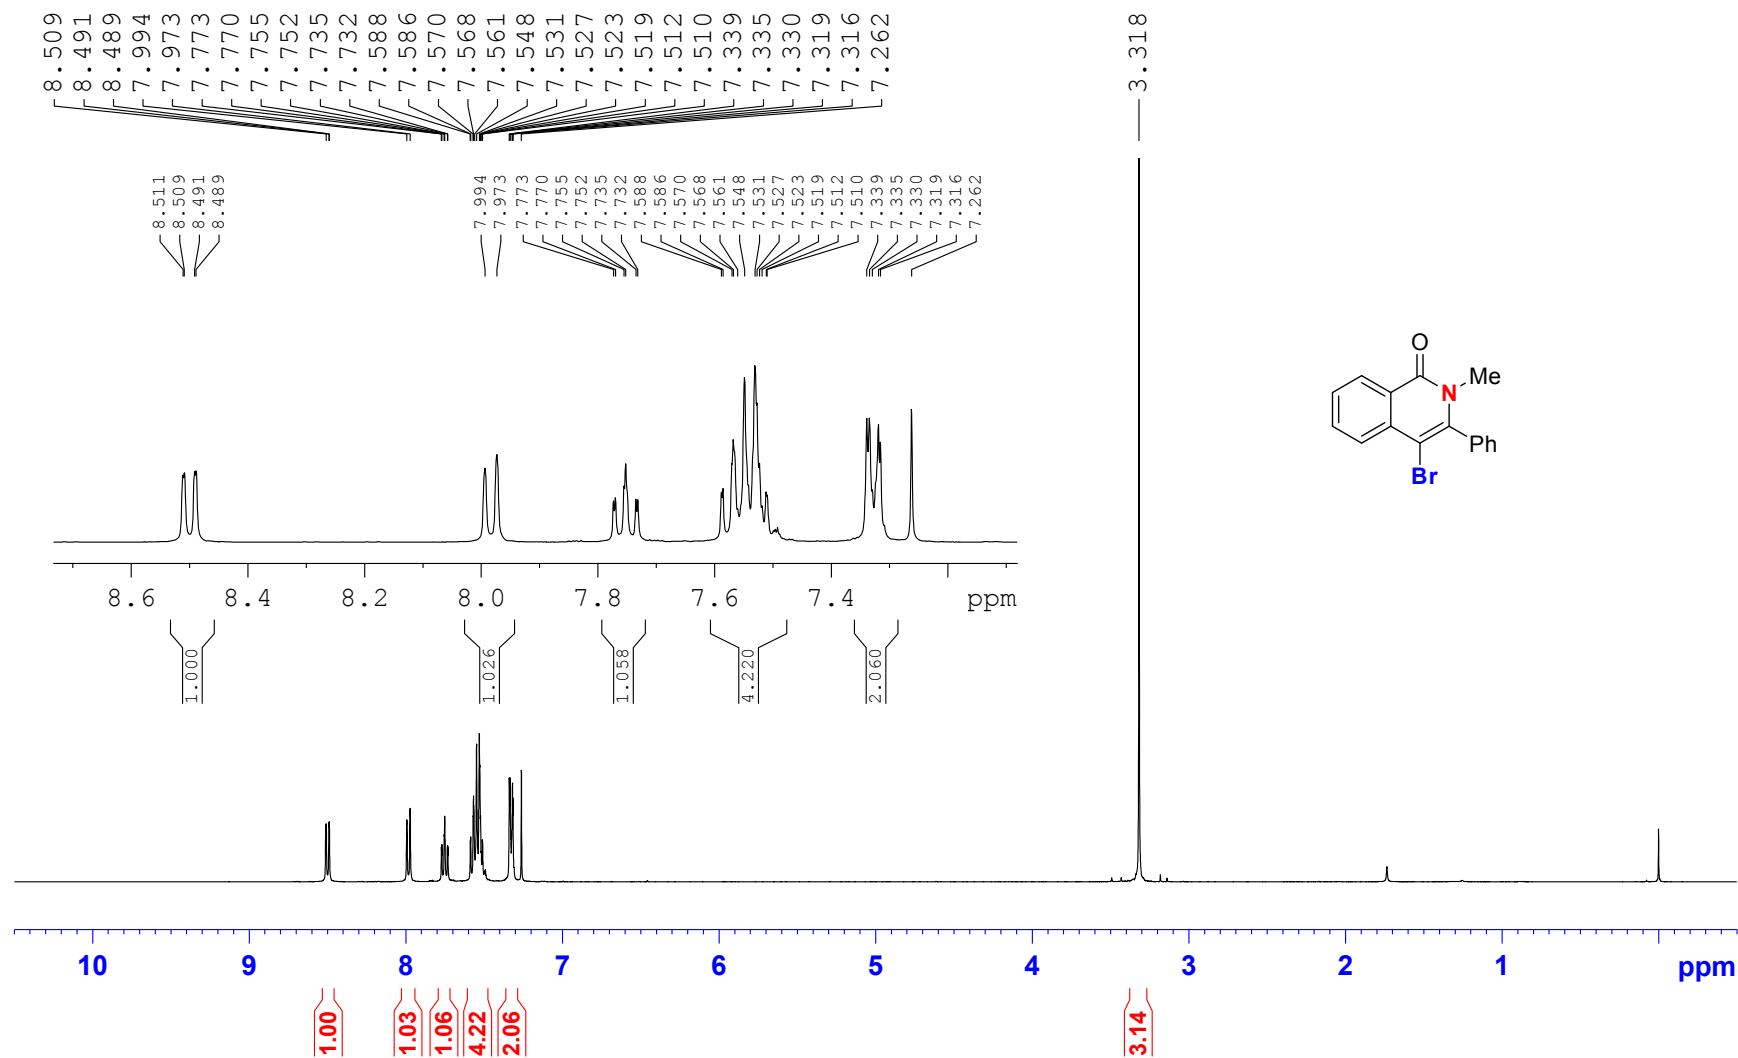

#### 4. $^1\text{H}$ and $^{13}\text{C}$ NMR spectrum of new compounds

$^{13}\text{C}$  NMR spectrum of **3al** (100 MHz,  $\text{CDCl}_3$ )

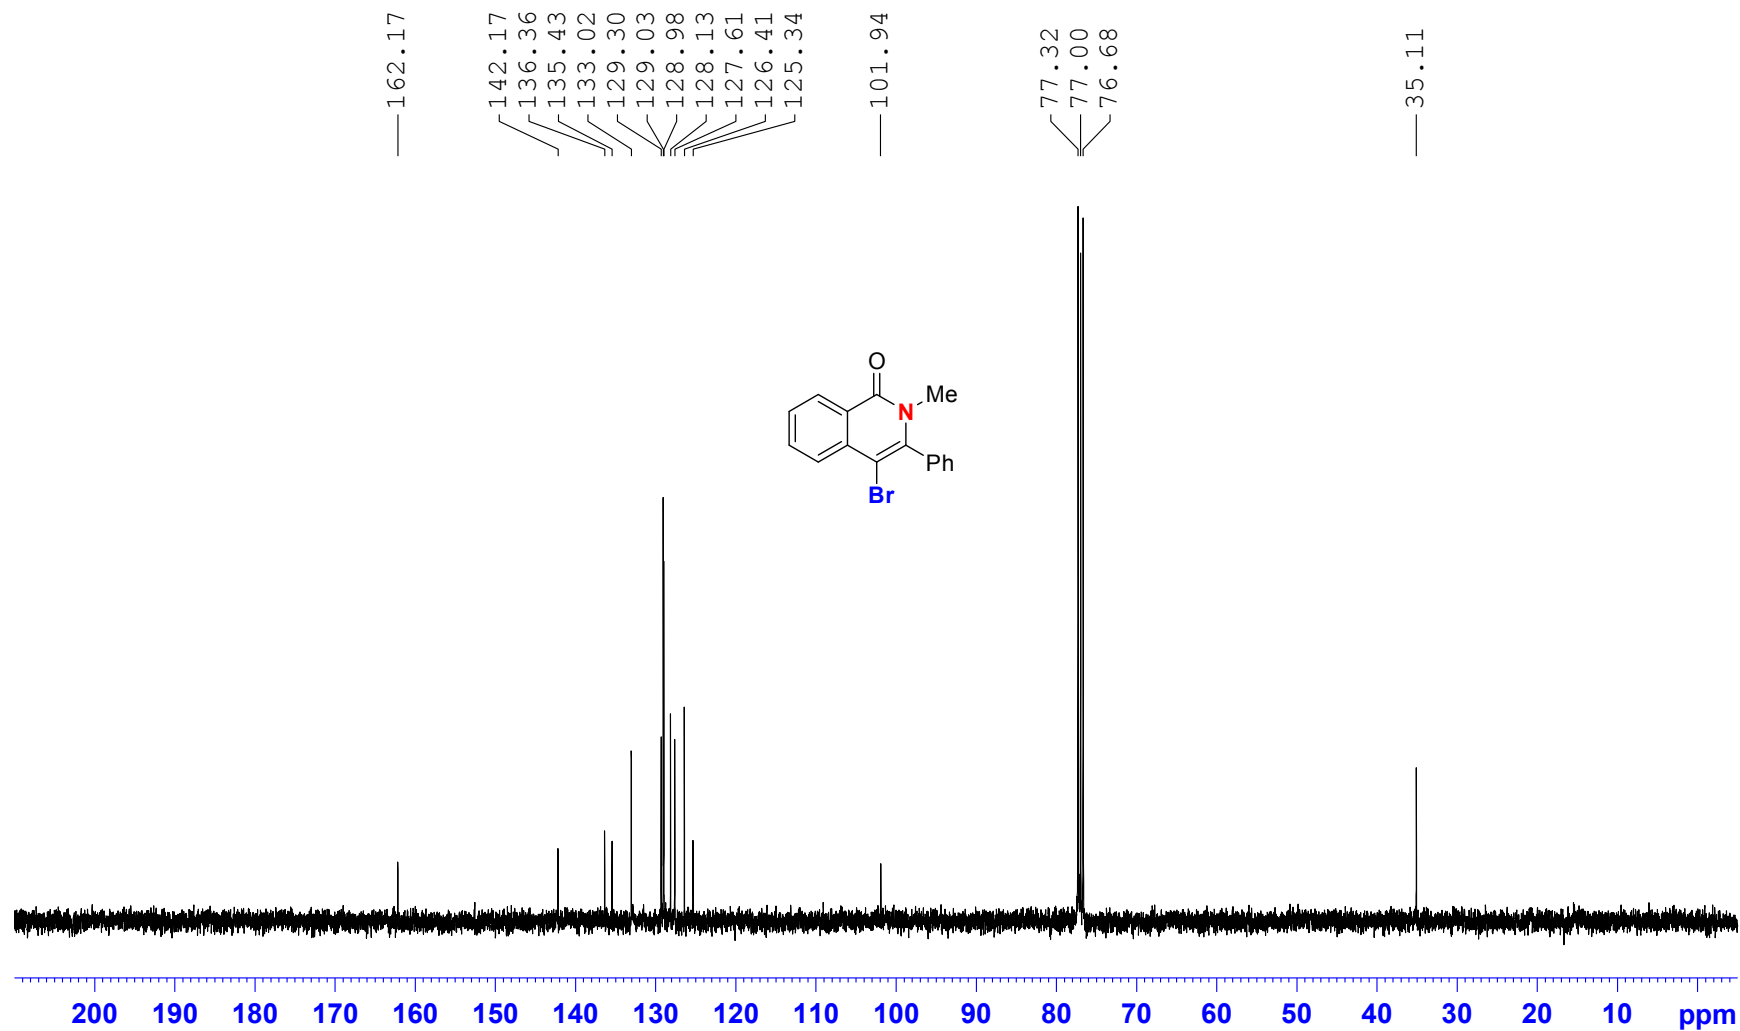

#### 4. $^1\text{H}$ and $^{13}\text{C}$ NMR spectrum of new compounds

$^1\text{H}$  NMR spectrum of **3ba** (400 MHz,  $\text{CDCl}_3$ )

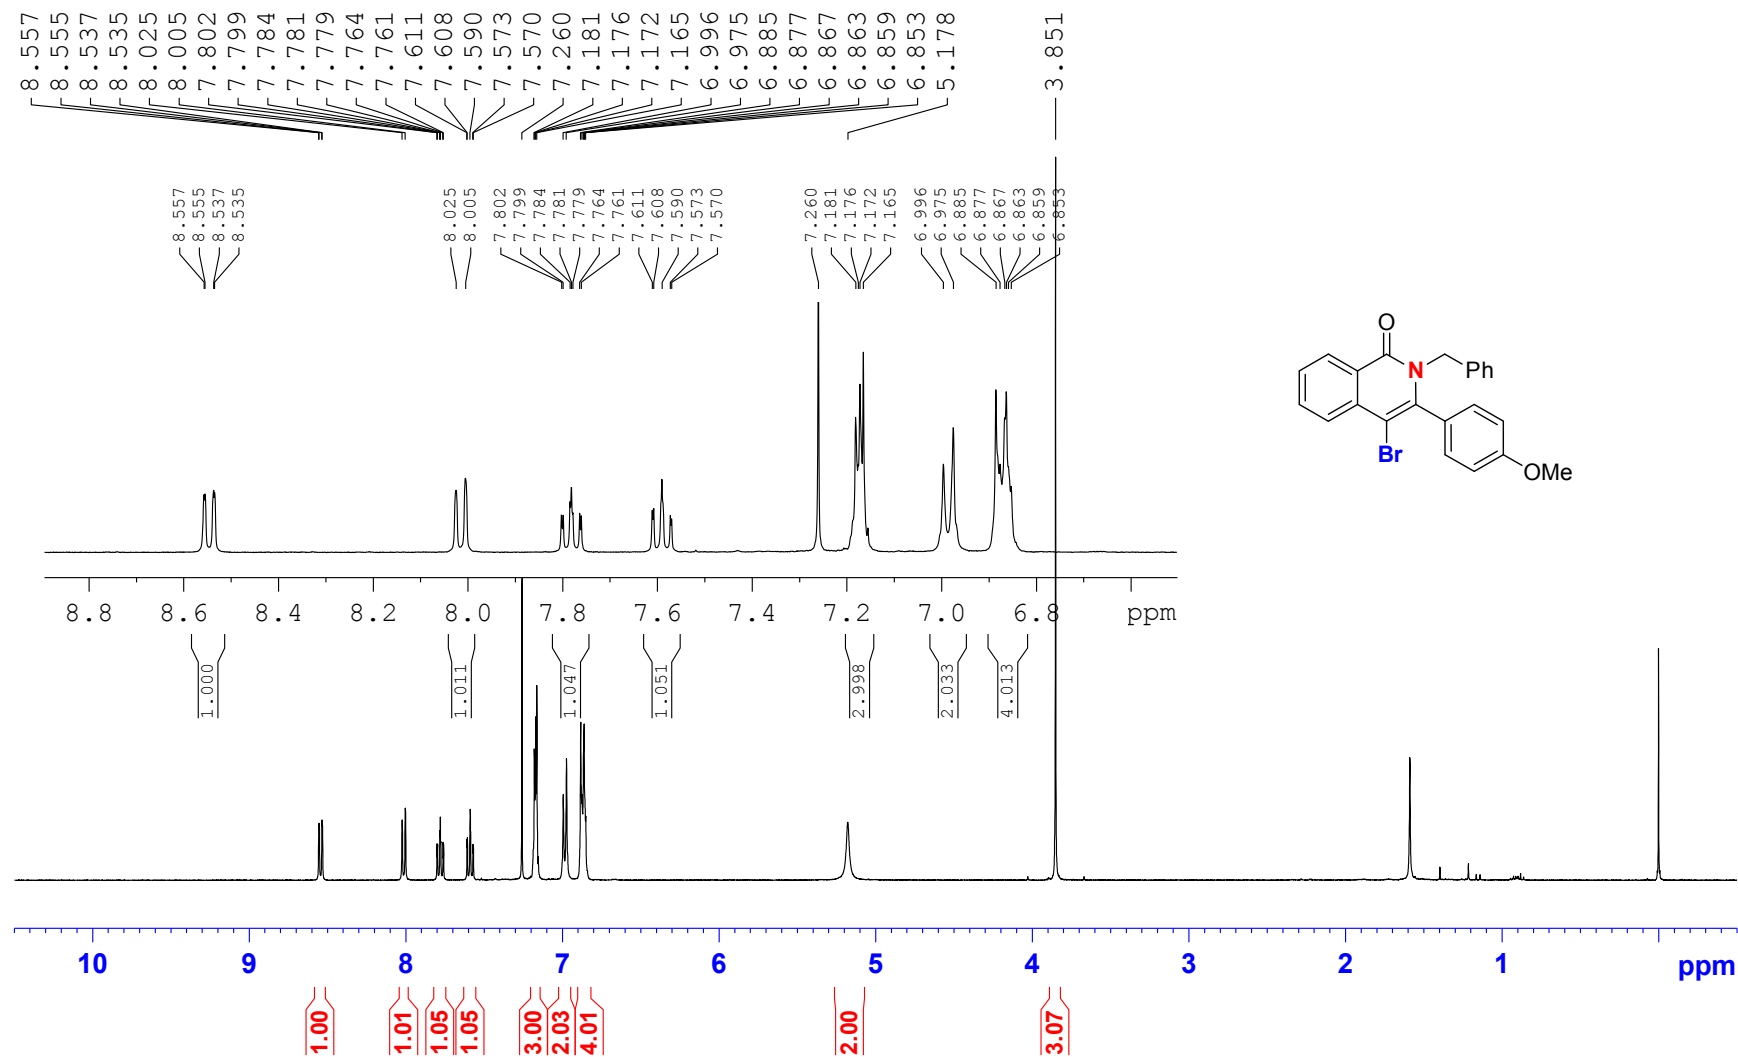

#### 4. $^1\text{H}$ and $^{13}\text{C}$ NMR spectrum of new compounds

$^{13}\text{C}$  NMR spectrum of **3ba** (100 MHz,  $\text{CDCl}_3$ )

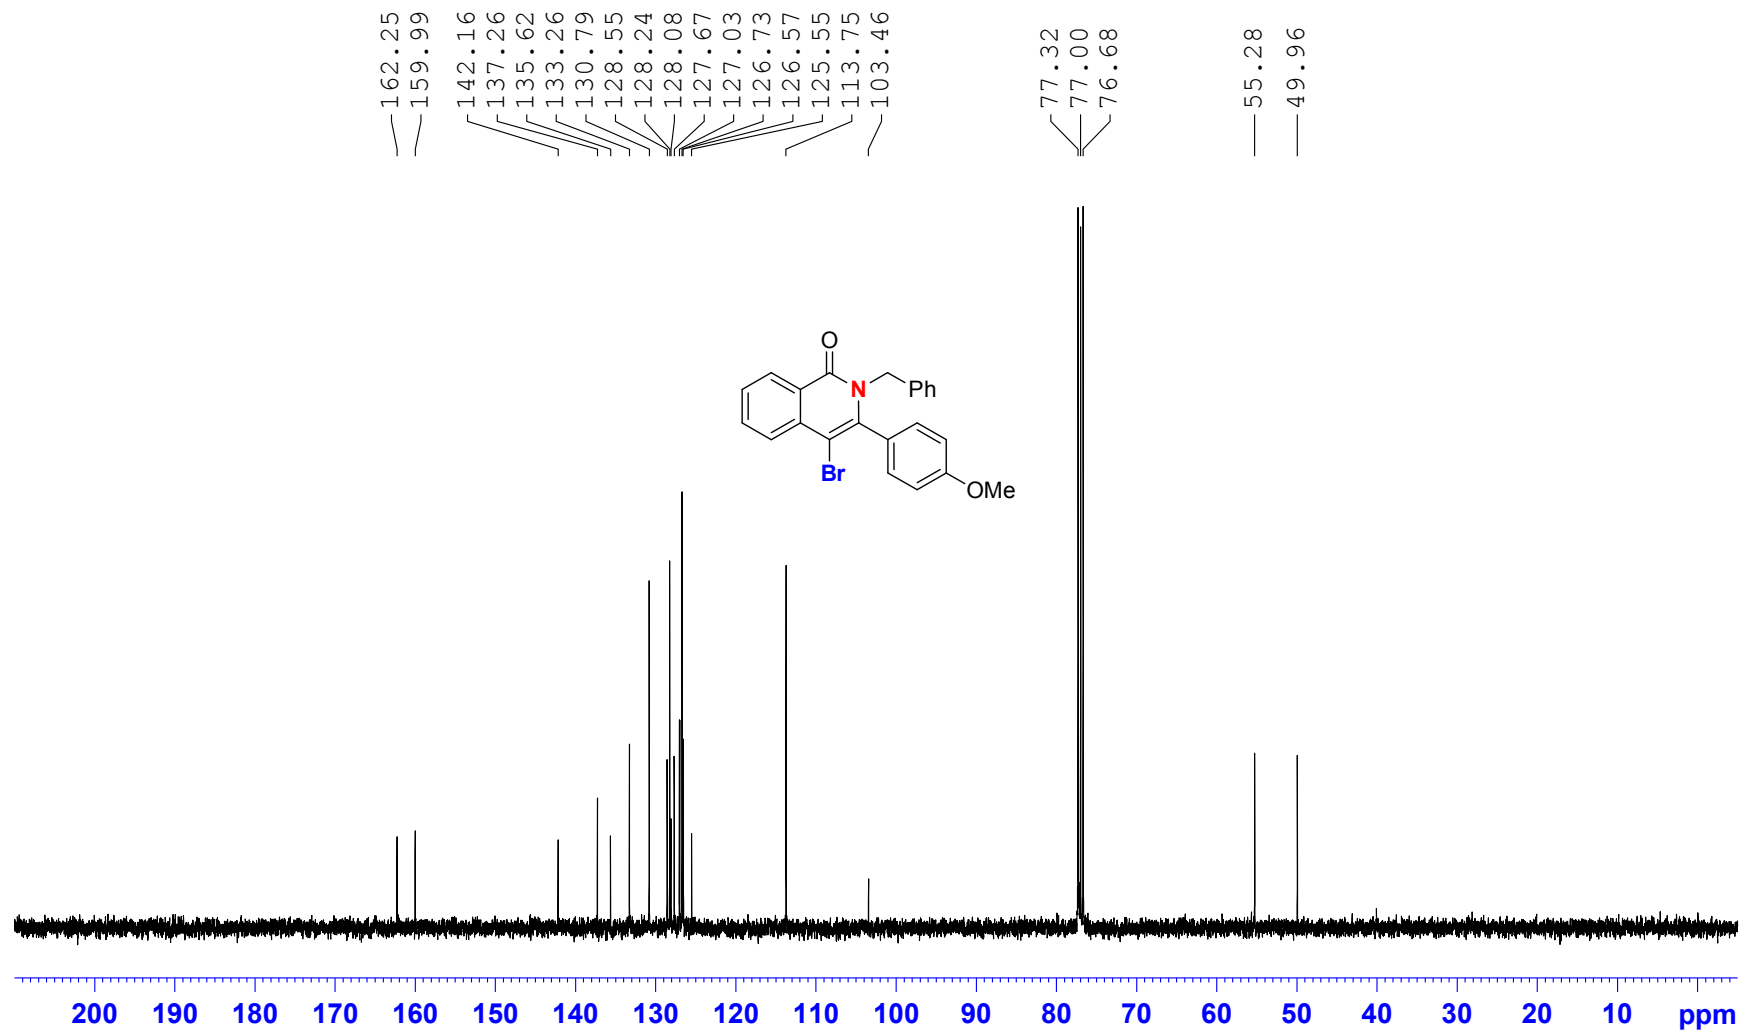

#### 4. $^1\text{H}$ and $^{13}\text{C}$ NMR spectrum of new compounds

$^1\text{H}$  NMR spectrum of **3ca** (400 MHz,  $\text{CDCl}_3$ )

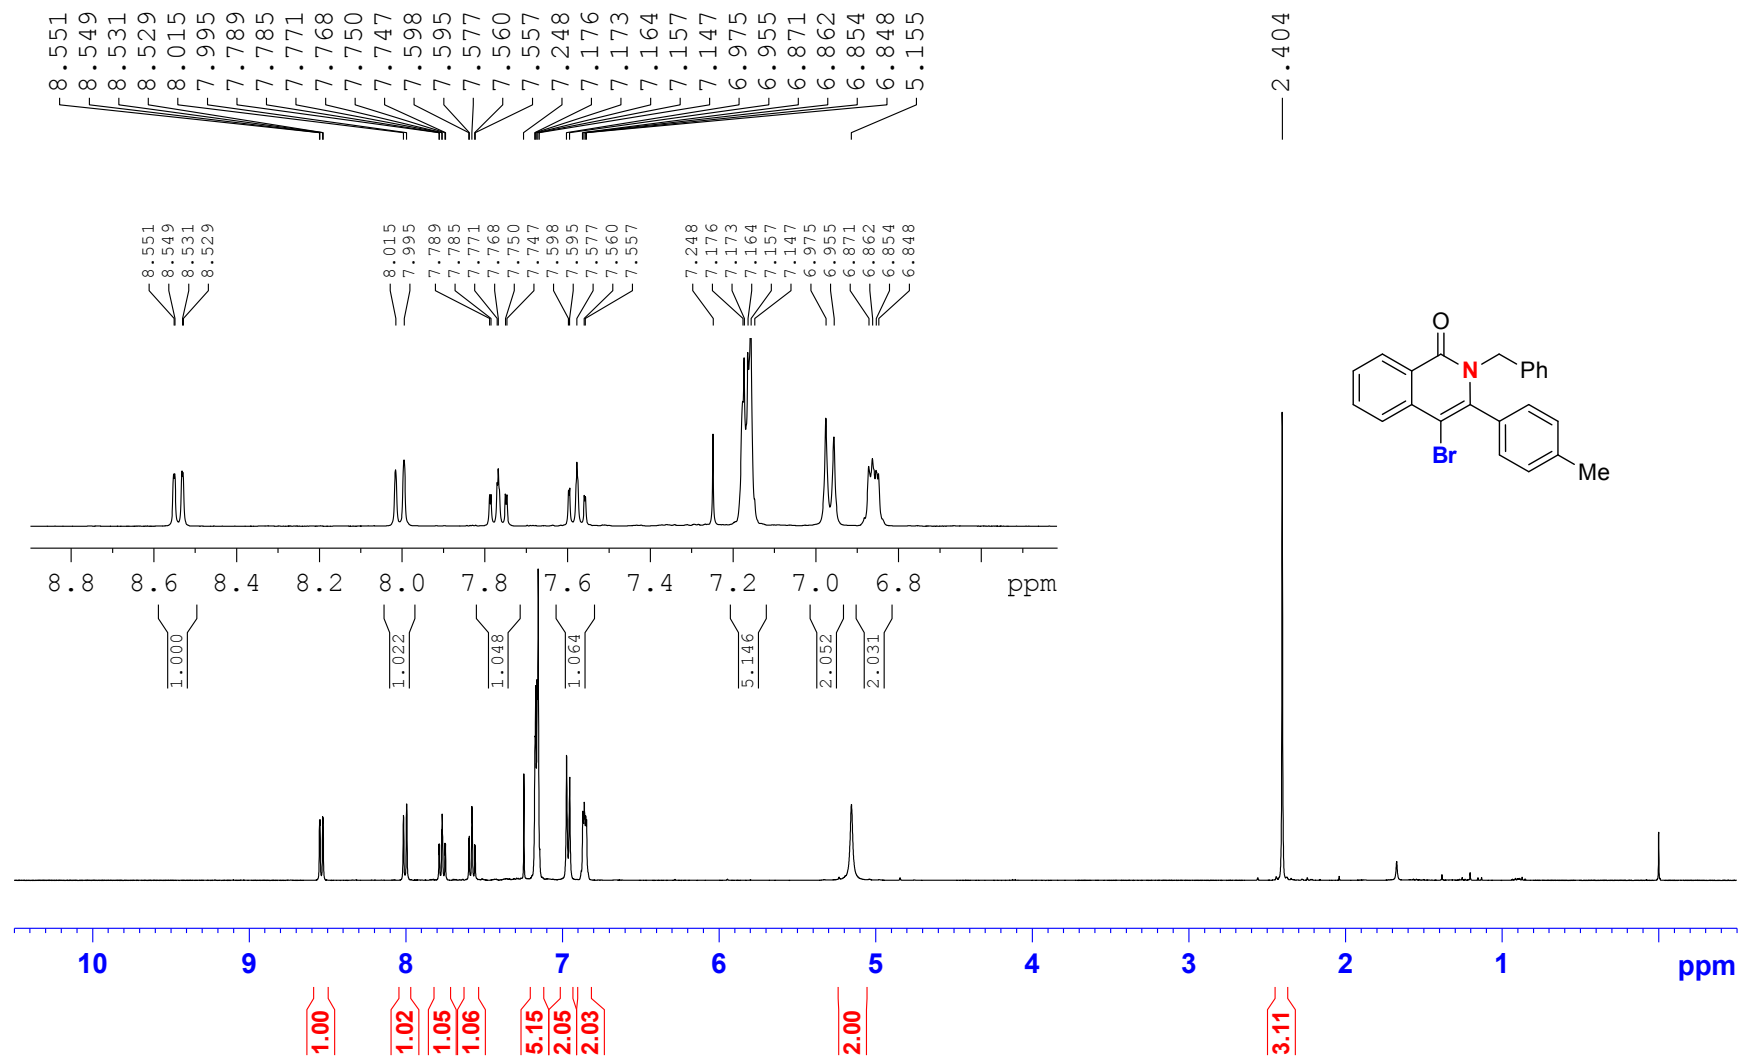

#### 4. $^1\text{H}$ and $^{13}\text{C}$ NMR spectrum of new compounds

$^{13}\text{C}$  NMR spectrum of **3ca** (100 MHz,  $\text{CDCl}_3$ )

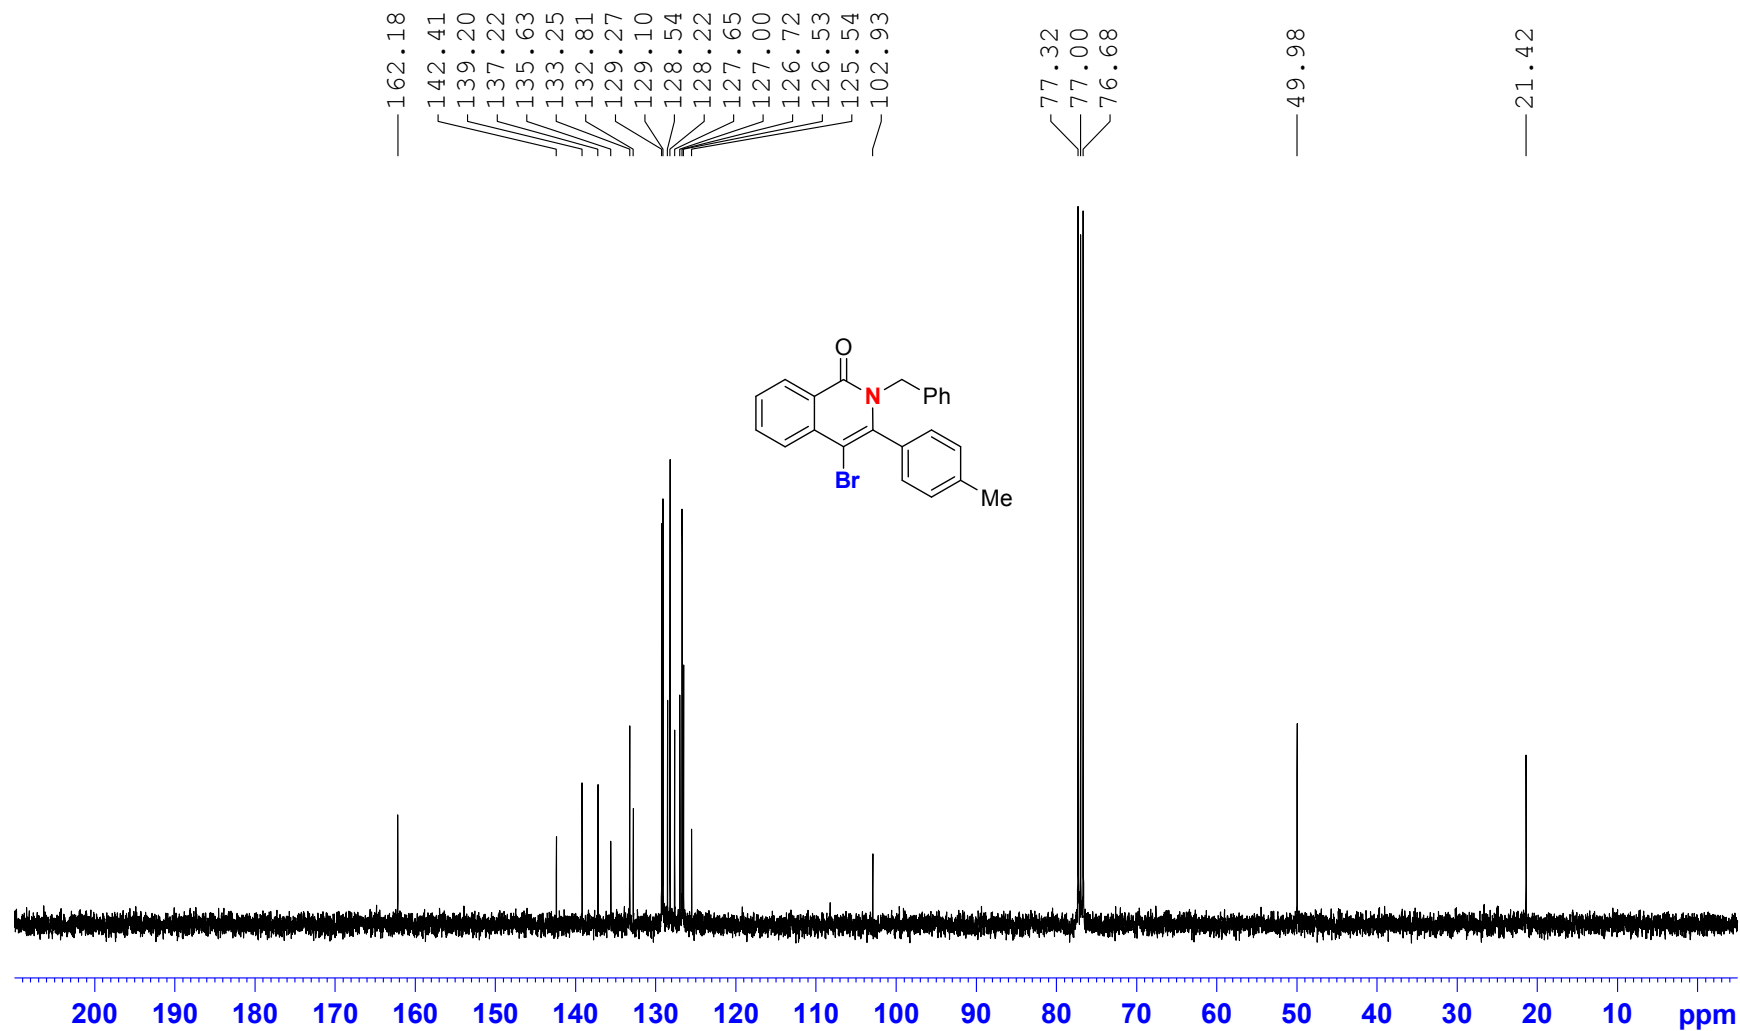

#### 4. $^1\text{H}$ and $^{13}\text{C}$ NMR spectrum of new compounds

$^1\text{H}$  NMR spectrum of **3da** (400 MHz,  $\text{CDCl}_3$ )

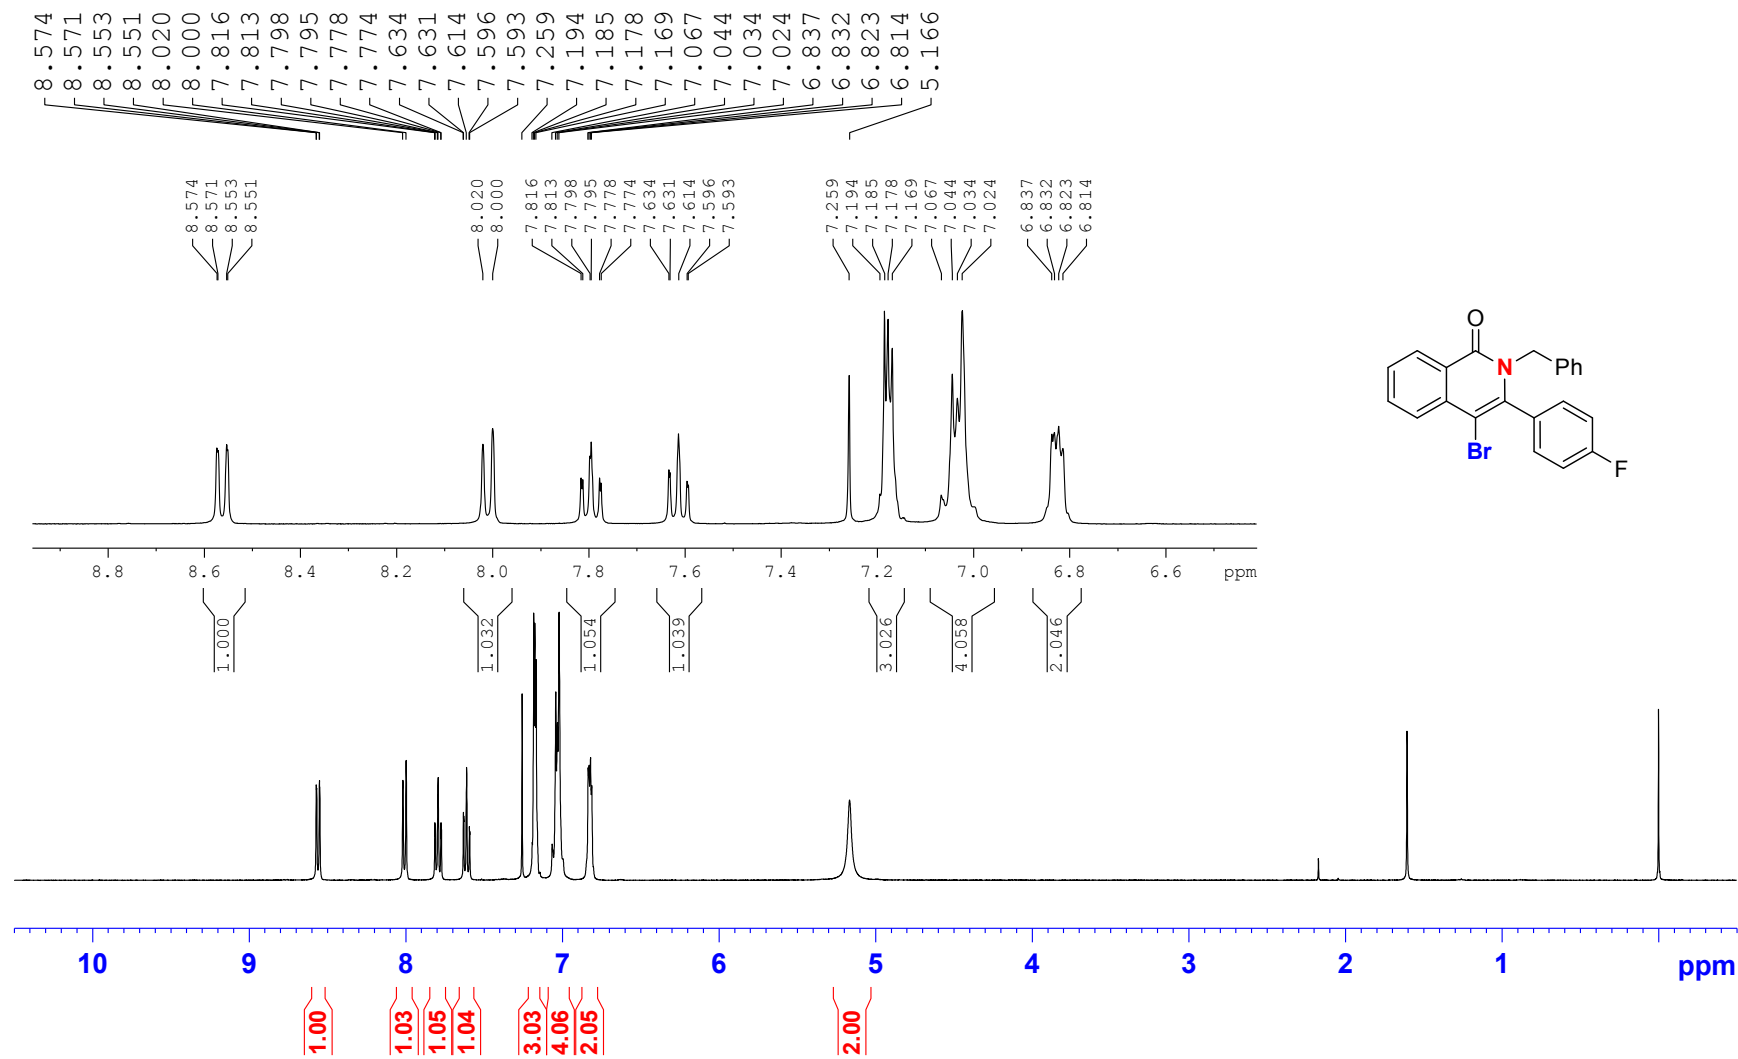



#### 4. $^1\text{H}$ and $^{13}\text{C}$ NMR spectrum of new compounds

$^{13}\text{C}$  NMR spectrum of **3da** (100 MHz,  $\text{CDCl}_3$ )

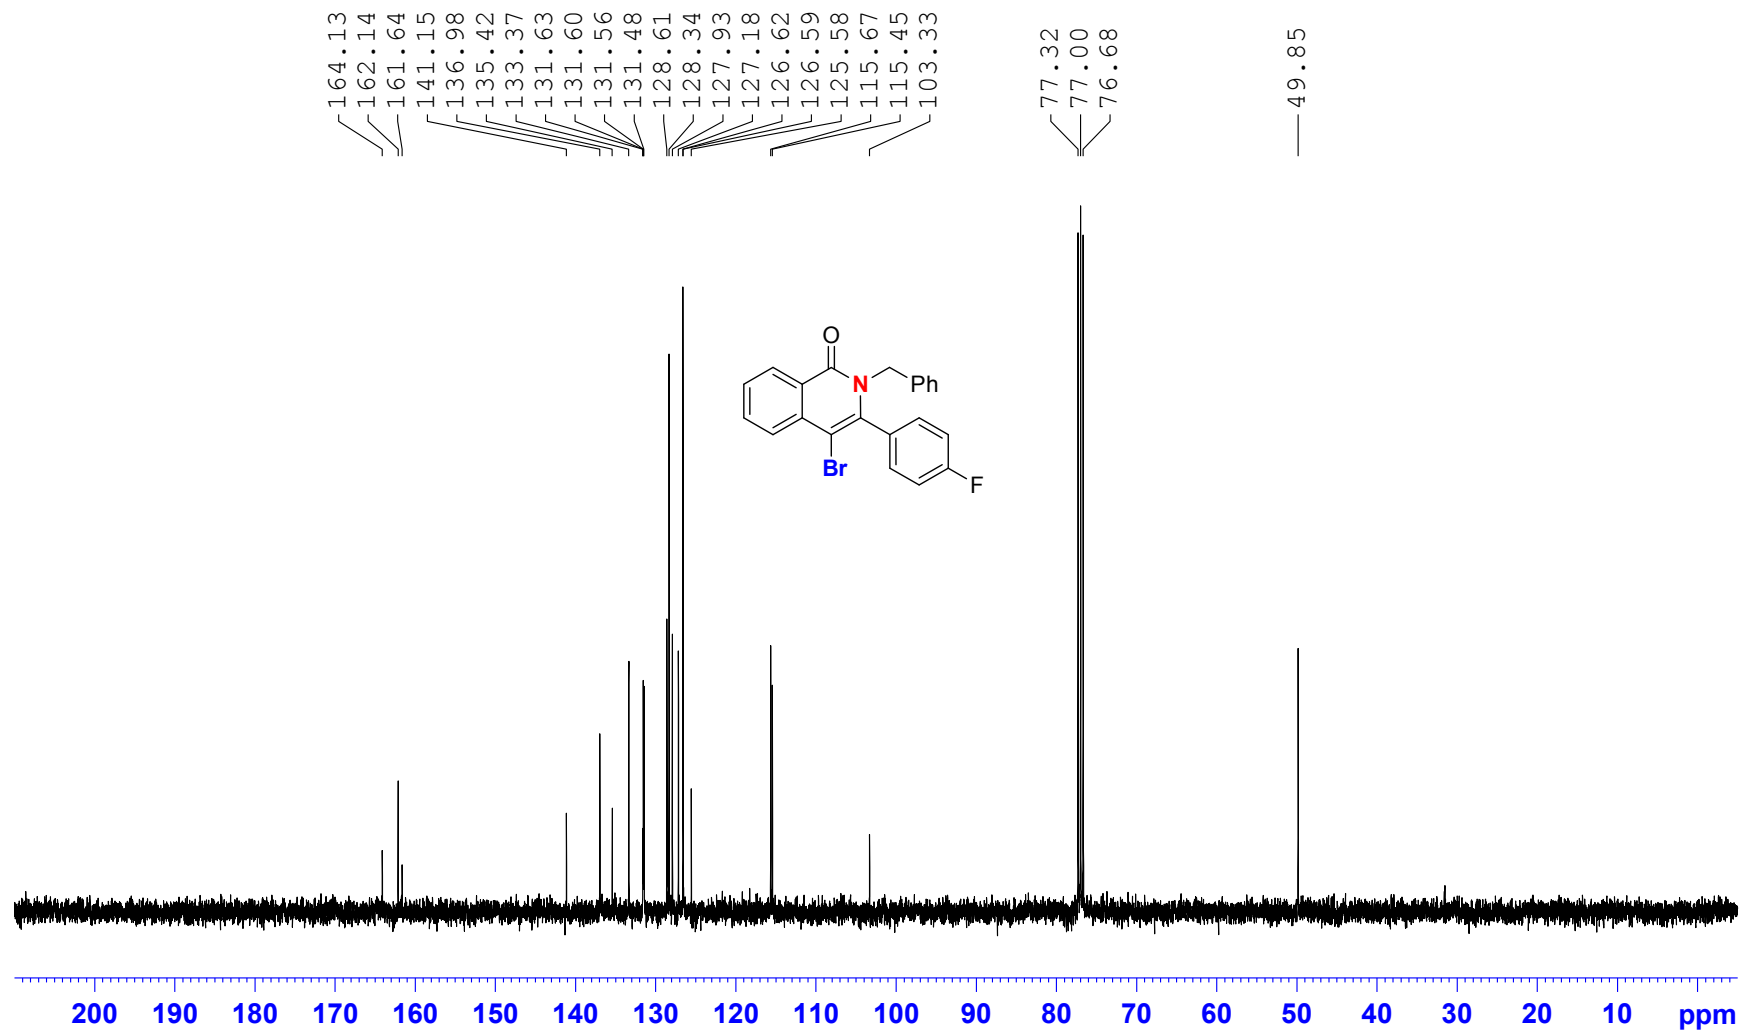

#### 4. $^1\text{H}$ and $^{13}\text{C}$ NMR spectrum of new compounds

$^1\text{H}$  NMR spectrum of **3ea** (400 MHz,  $\text{CDCl}_3$ )

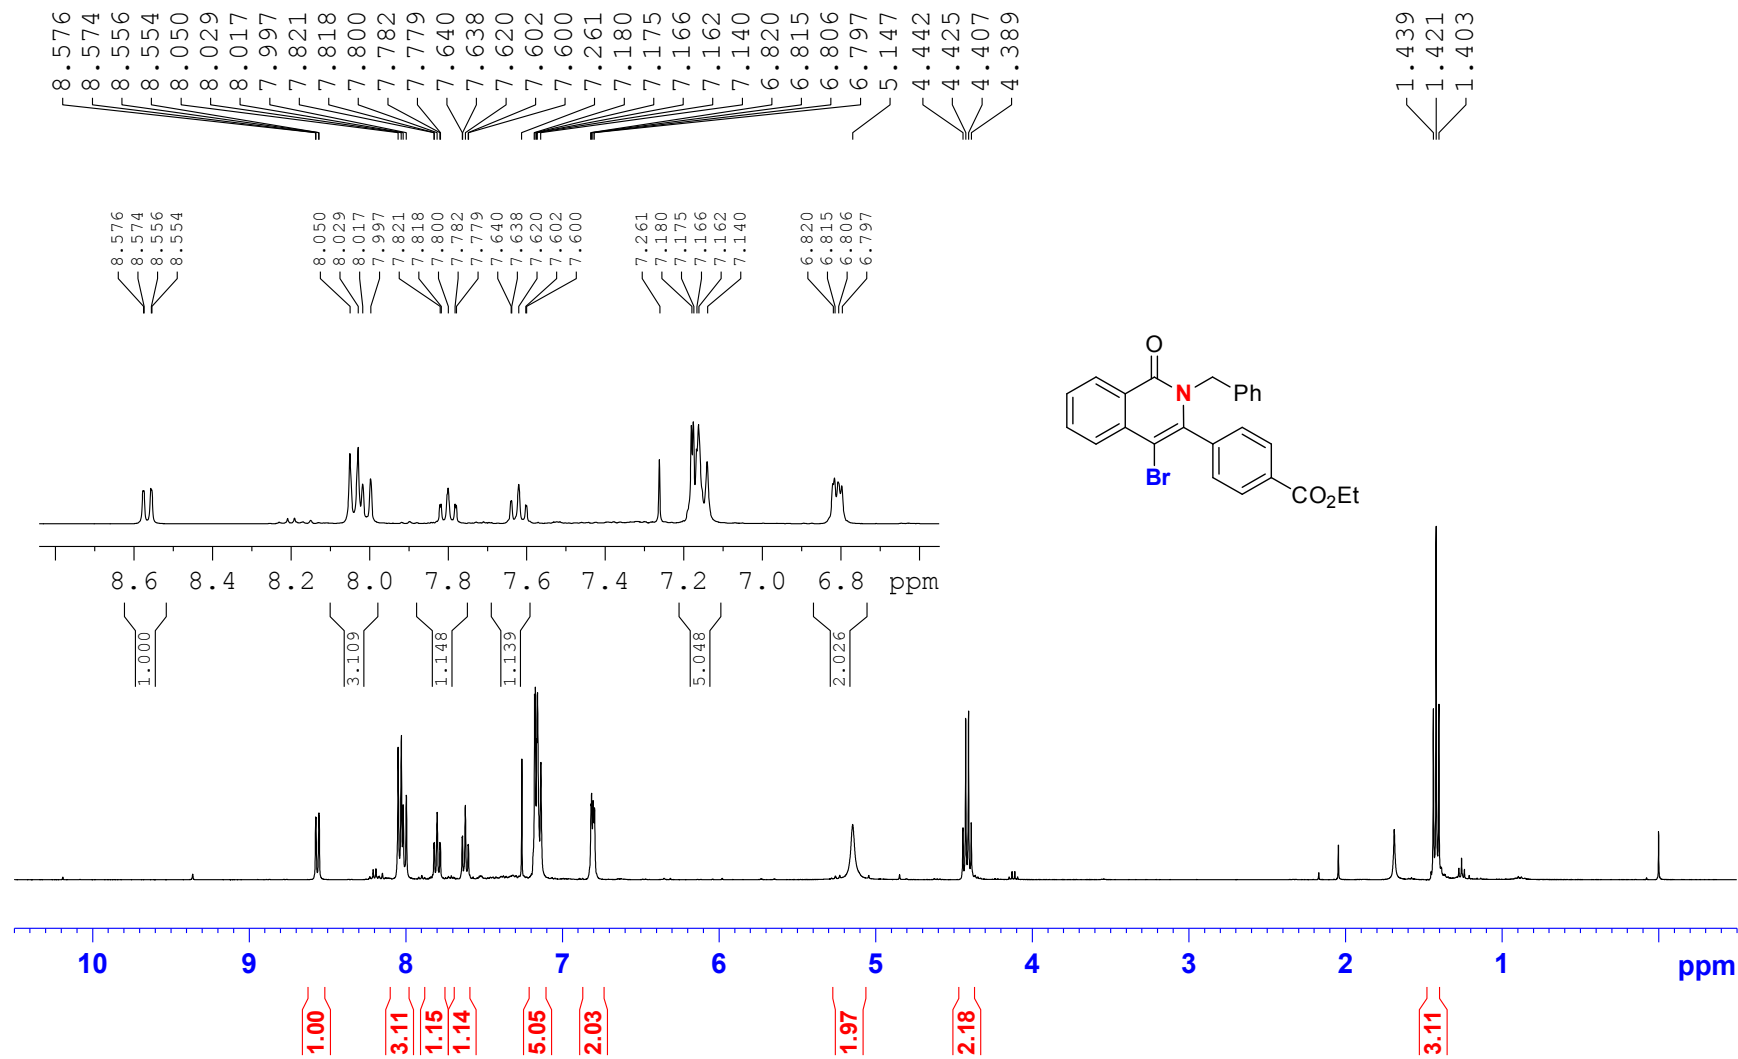

#### 4. $^1\text{H}$ and $^{13}\text{C}$ NMR spectrum of new compounds

$^{13}\text{C}$  NMR spectrum of **3ea** (100 MHz,  $\text{CDCl}_3$ )

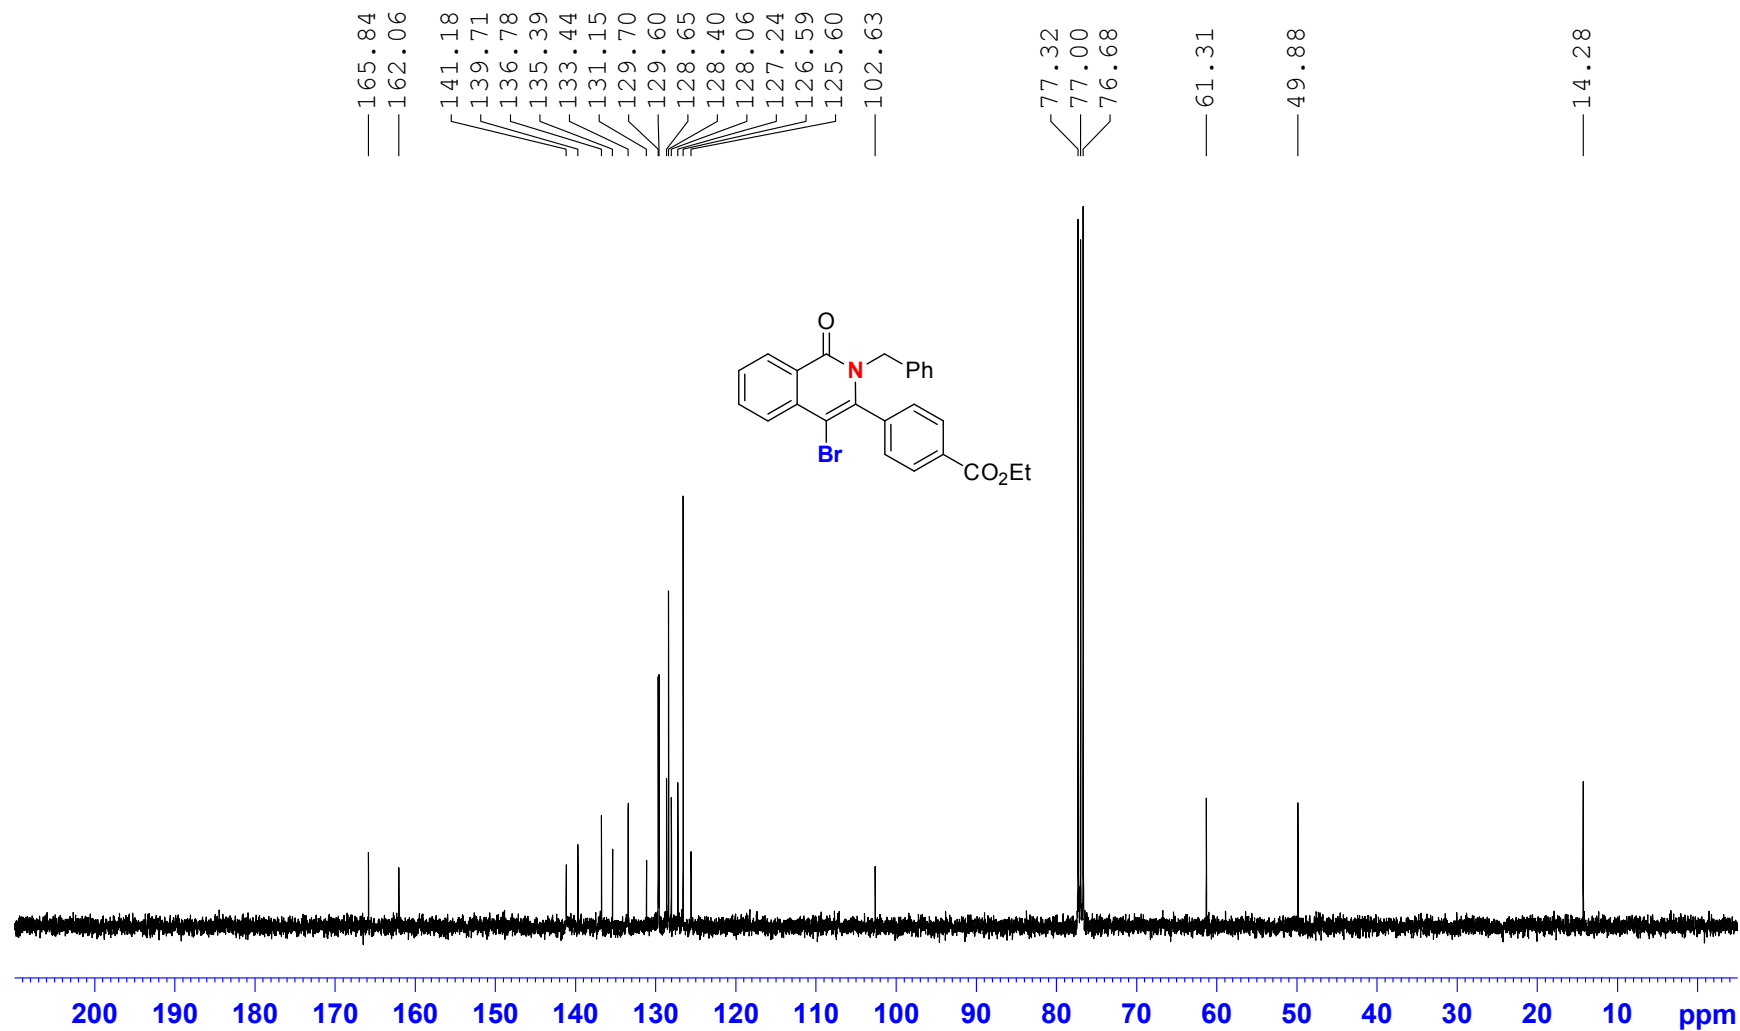

#### 4. $^1\text{H}$ and $^{13}\text{C}$ NMR spectrum of new compounds

$^1\text{H}$  NMR spectrum of **3fa** (400 MHz,  $\text{CDCl}_3$ )

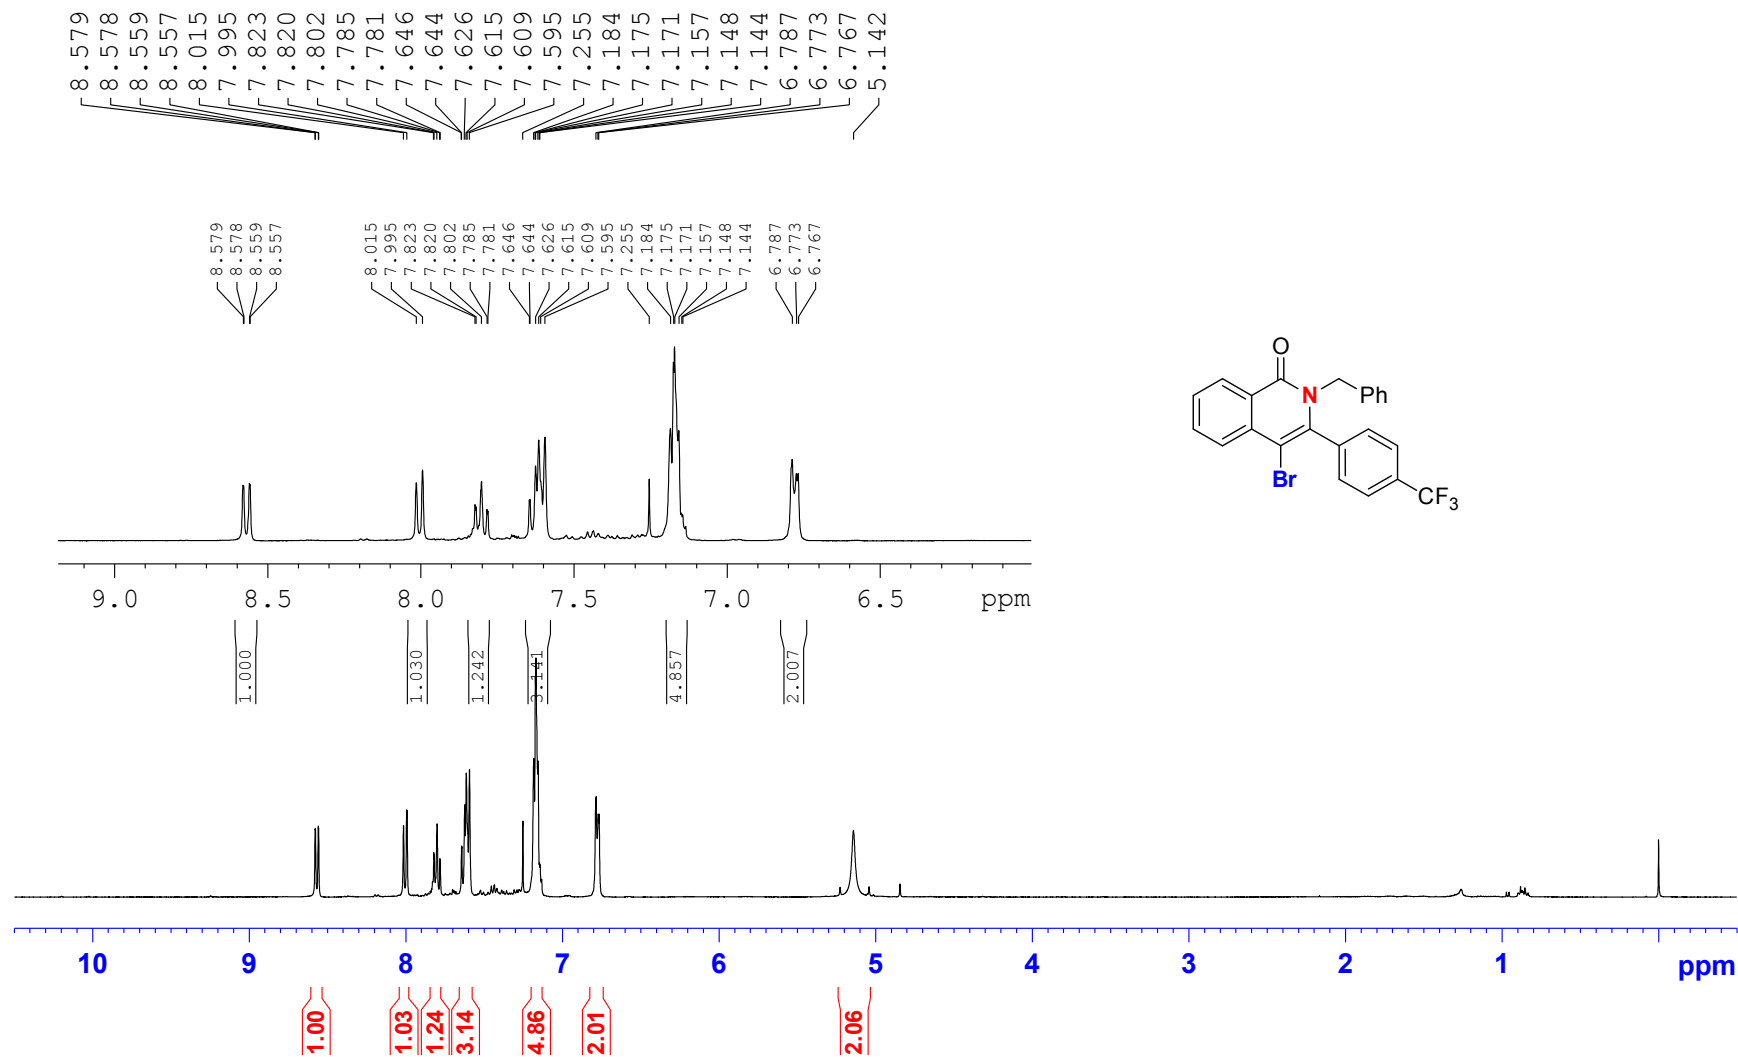

#### 4. $^1\text{H}$ and $^{13}\text{C}$ NMR spectrum of new compounds

$^{13}\text{C}$  NMR spectrum of **3fa** (100 MHz,  $\text{CDCl}_3$ )

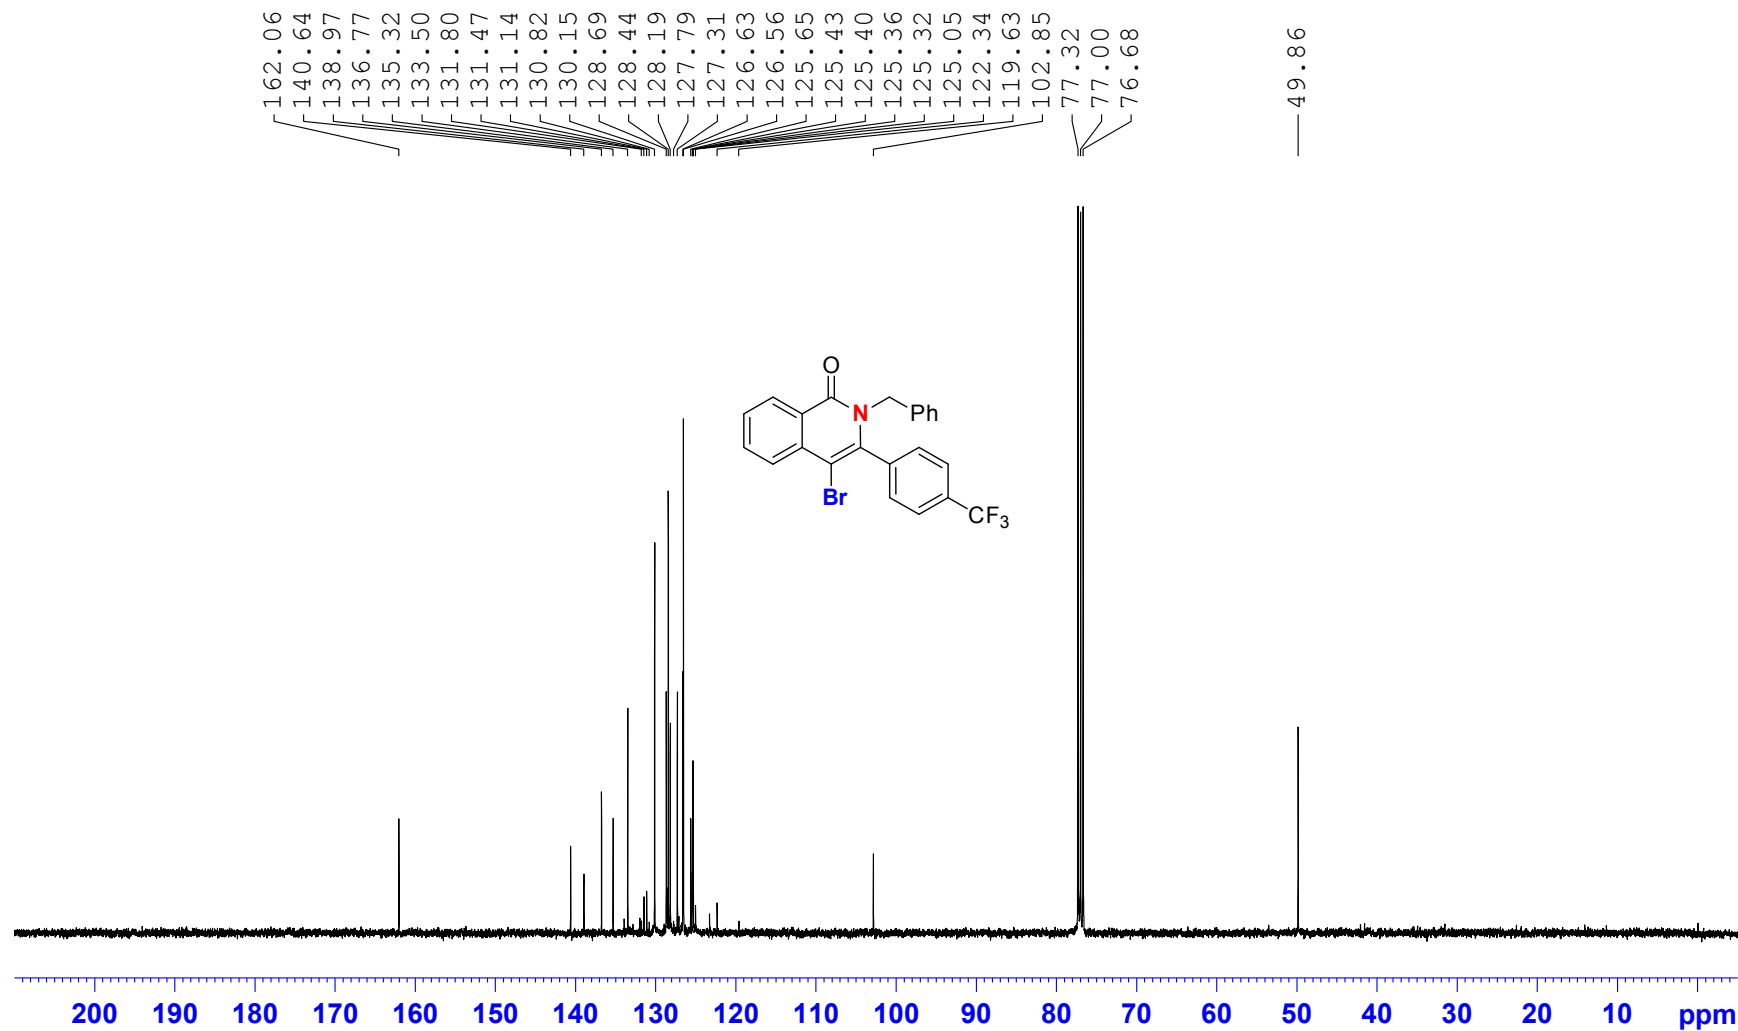

#### 4. $^1\text{H}$ and $^{13}\text{C}$ NMR spectrum of new compounds

$^1\text{H}$  NMR spectrum of **3ga** (400 MHz,  $\text{CDCl}_3$ )

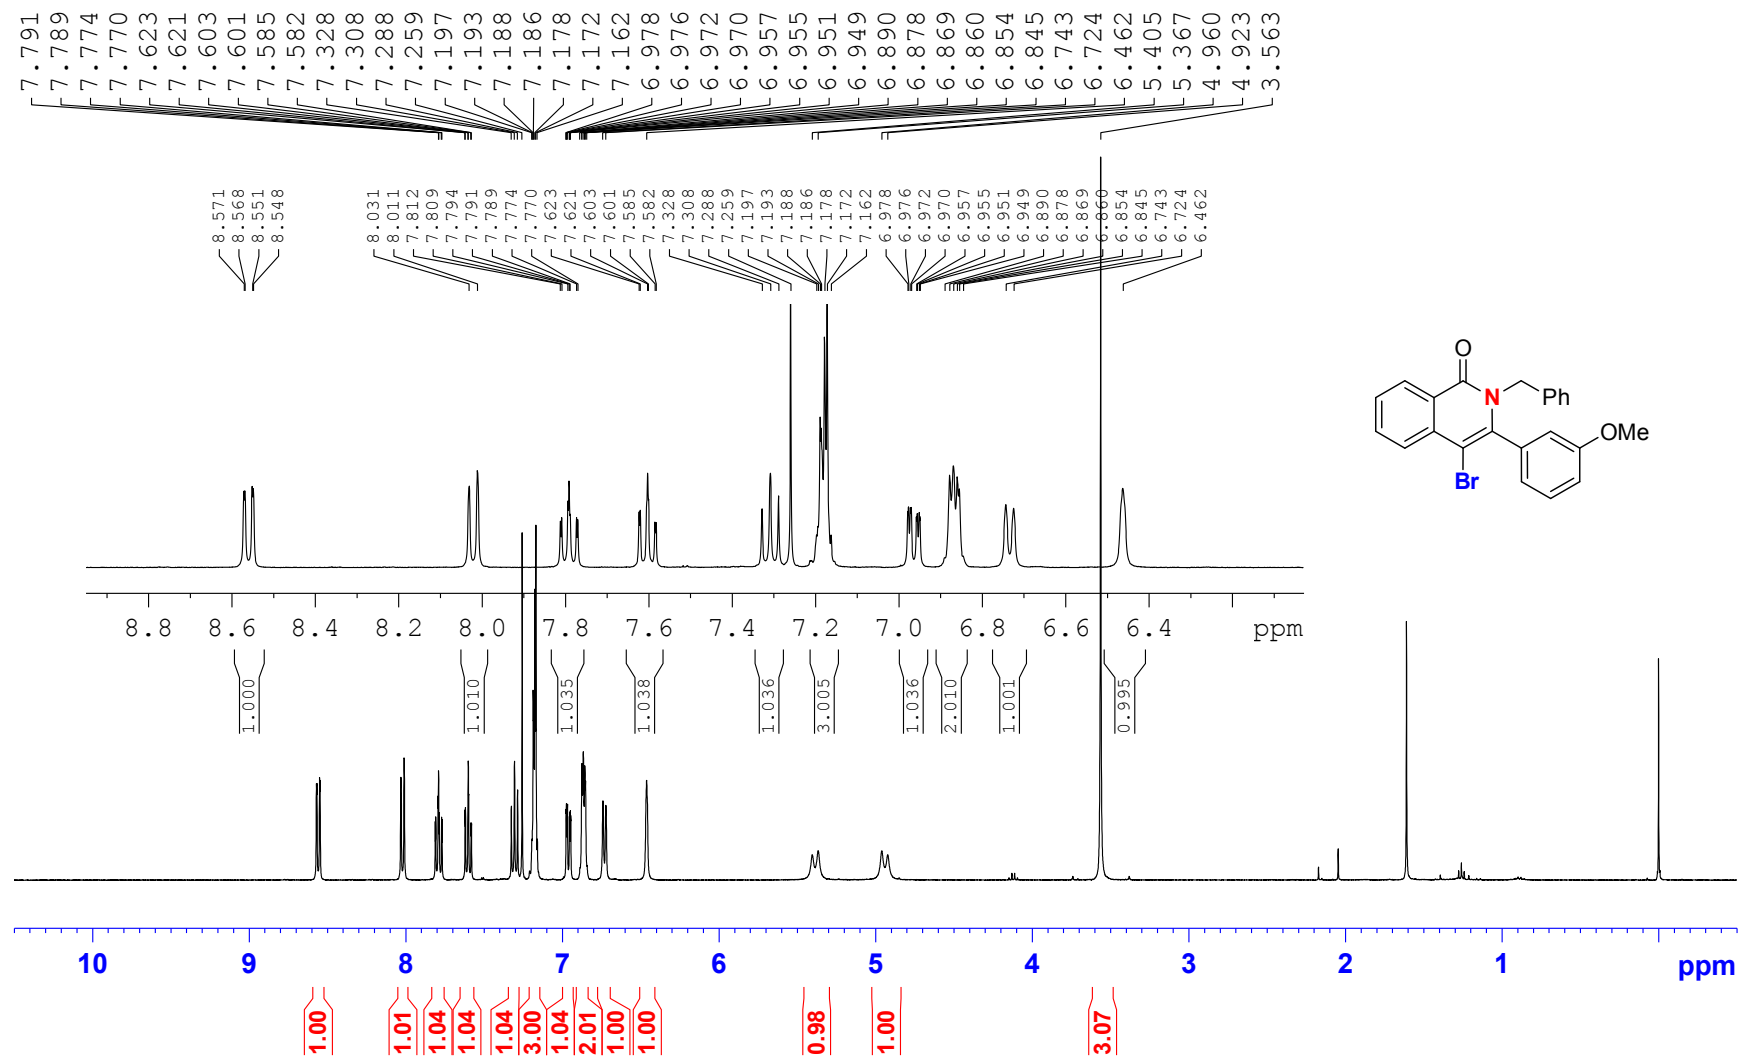

#### 4. $^1\text{H}$ and $^{13}\text{C}$ NMR spectrum of new compounds

$^{13}\text{C}$  NMR spectrum of **3ga** (100 MHz,  $\text{CDCl}_3$ )

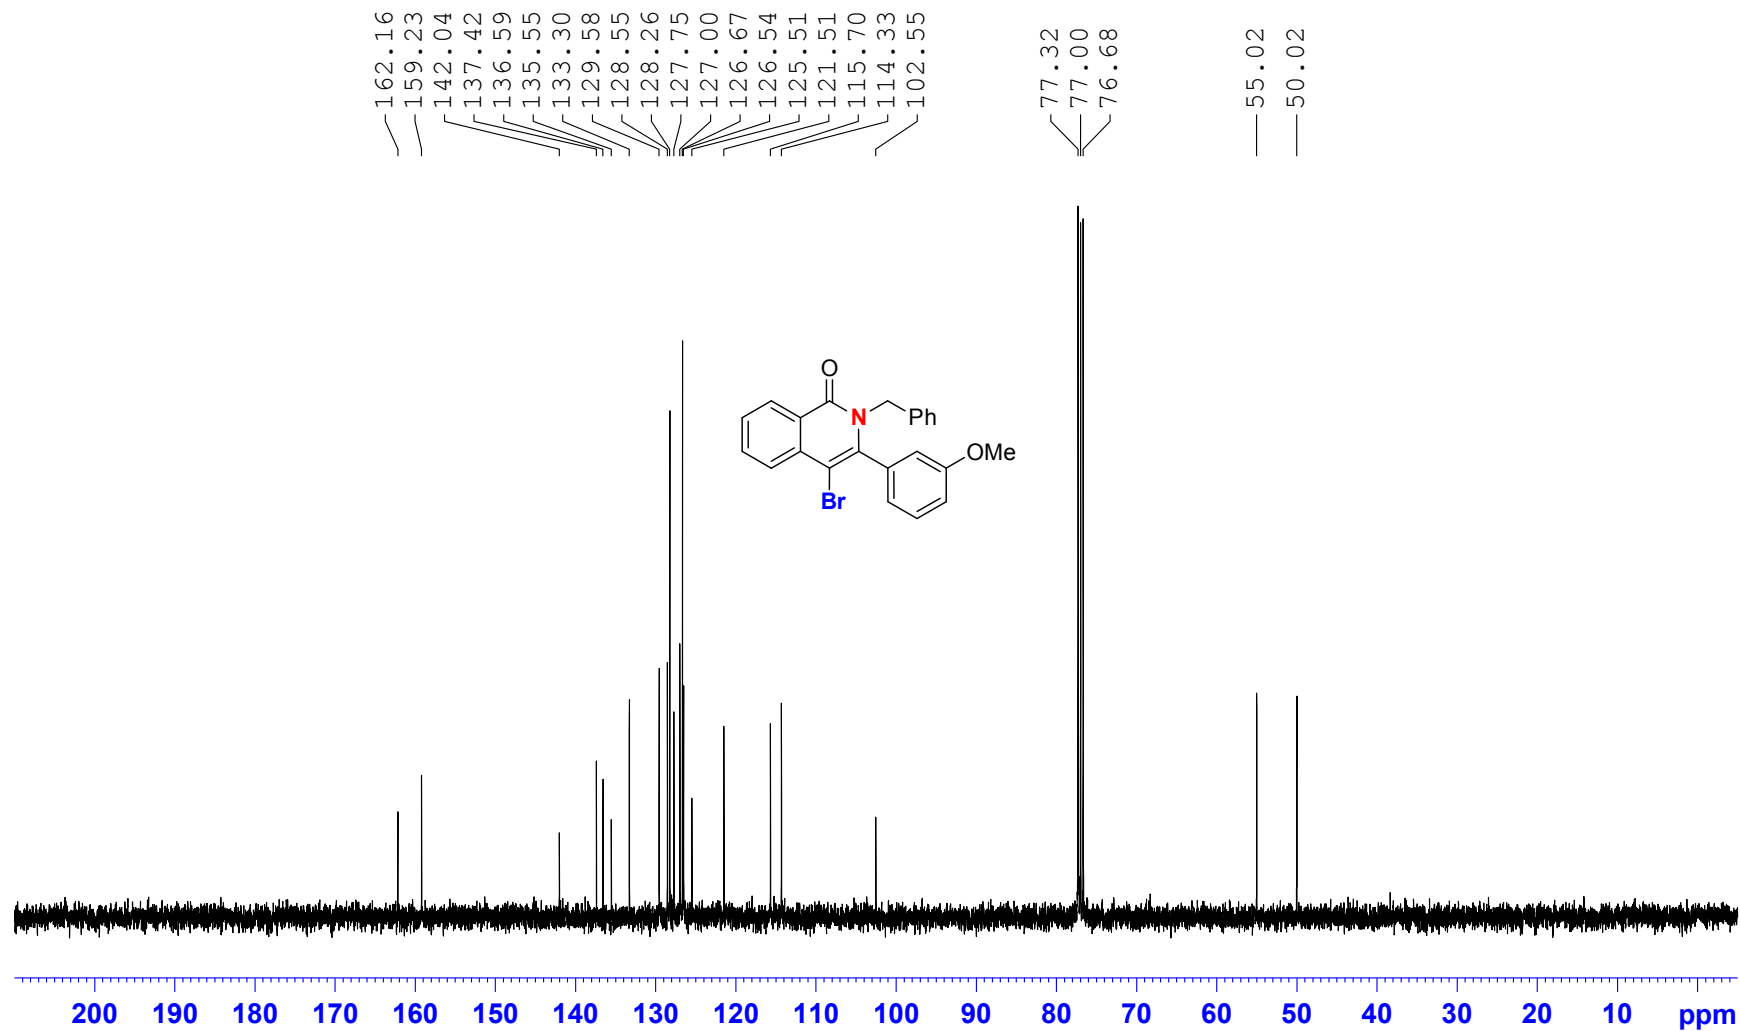

#### 4. $^1\text{H}$ and $^{13}\text{C}$ NMR spectrum of new compounds

$^1\text{H}$  NMR spectrum of **3ha** (400 MHz,  $\text{CDCl}_3$ )

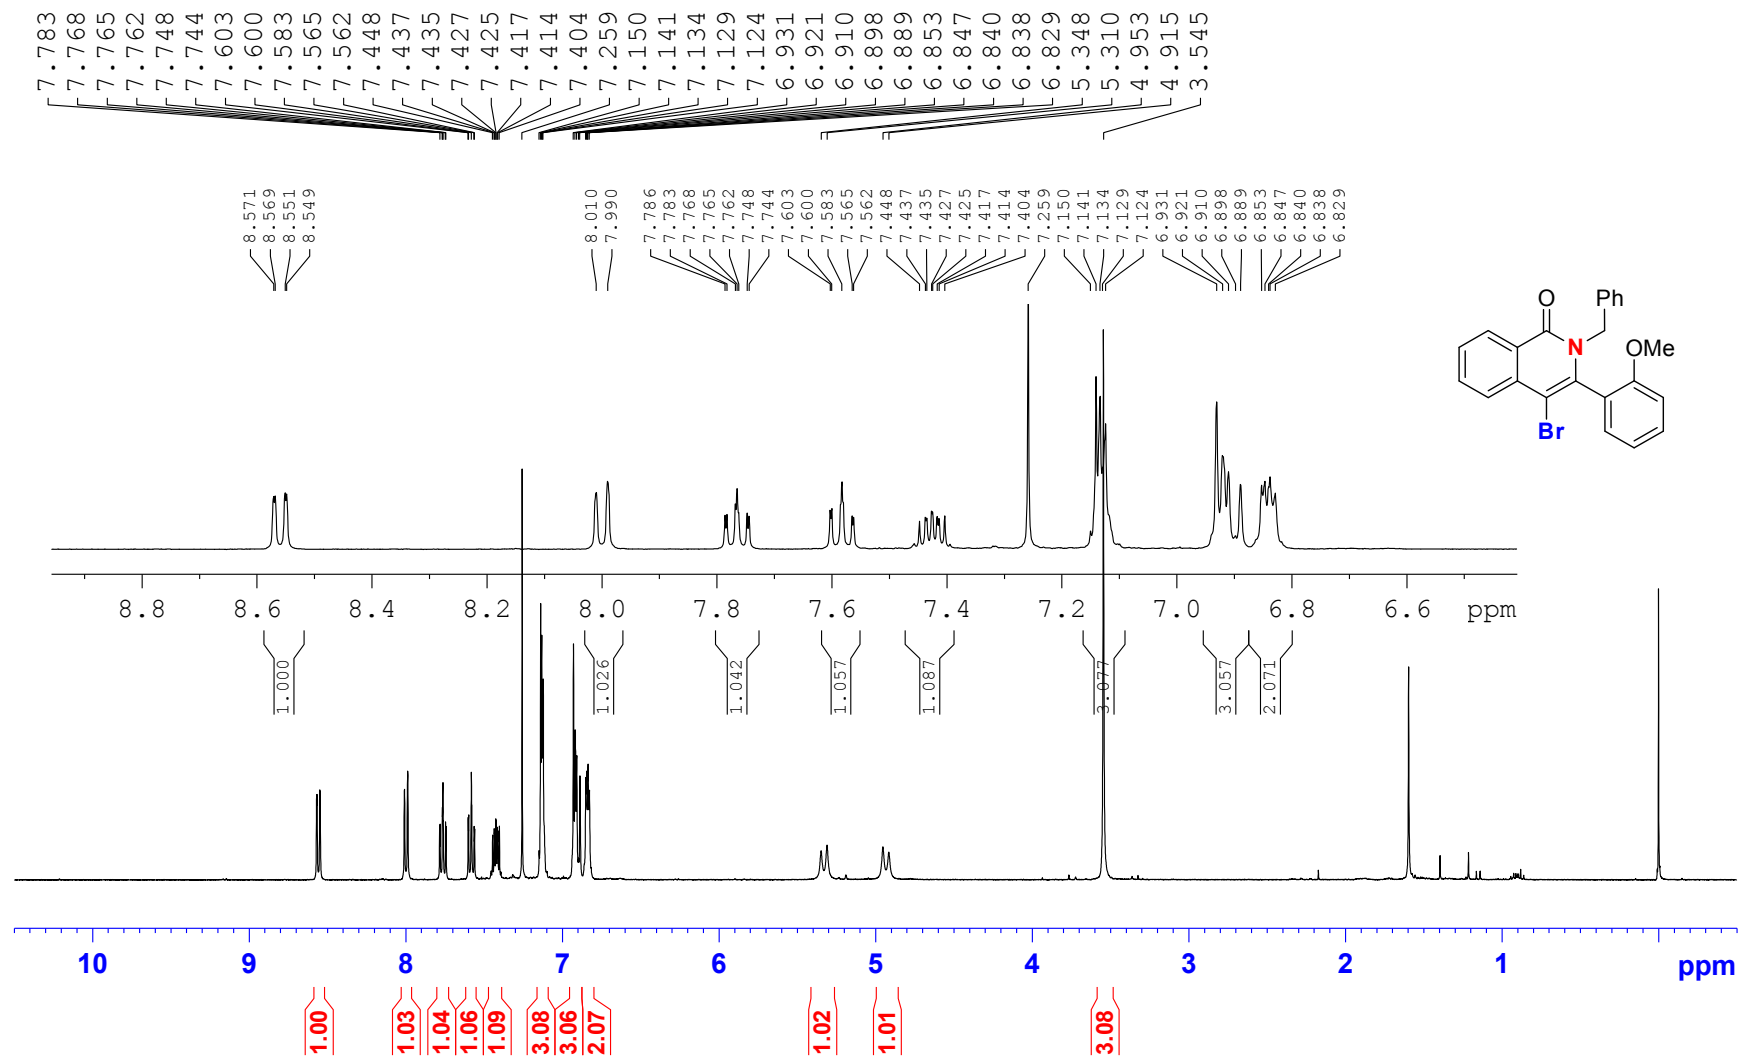



#### 4. $^1\text{H}$ and $^{13}\text{C}$ NMR spectrum of new compounds

$^{13}\text{C}$  NMR spectrum of **3ha** (100 MHz,  $\text{CDCl}_3$ )

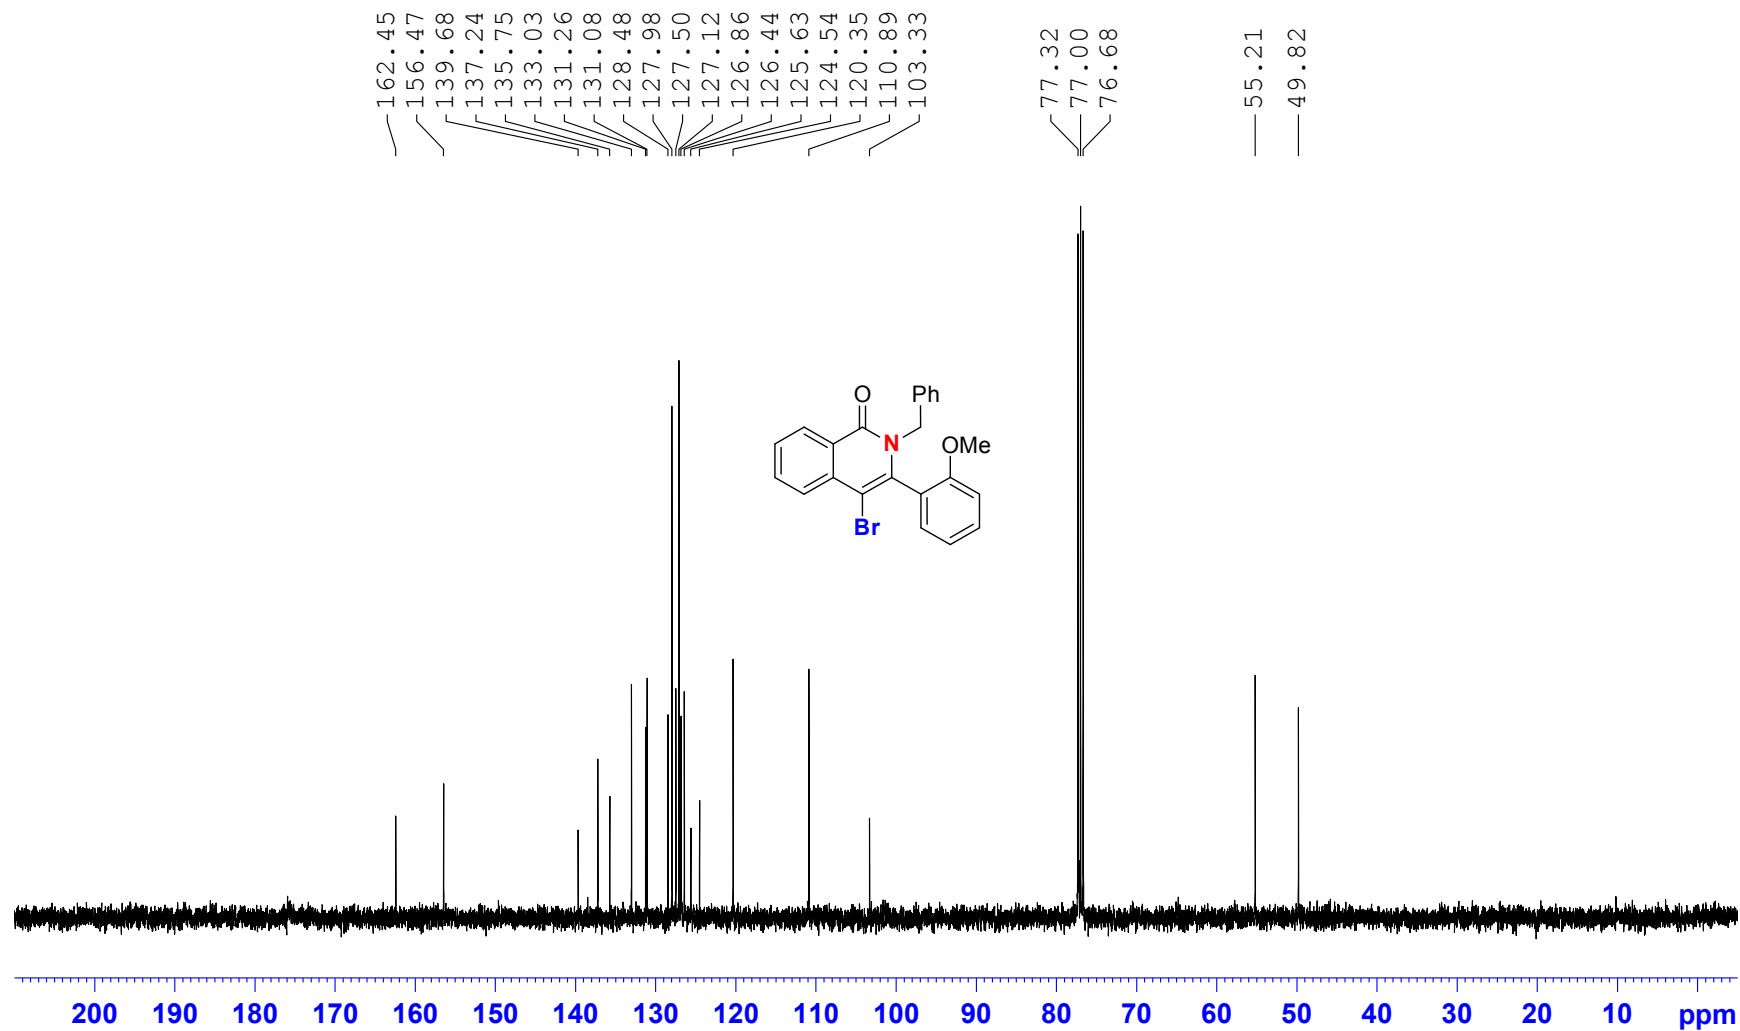



#### 4. $^1\text{H}$ and $^{13}\text{C}$ NMR spectrum of new compounds

$^{13}\text{C}$  NMR spectrum of **3ia** (100 MHz,  $\text{CDCl}_3$ )

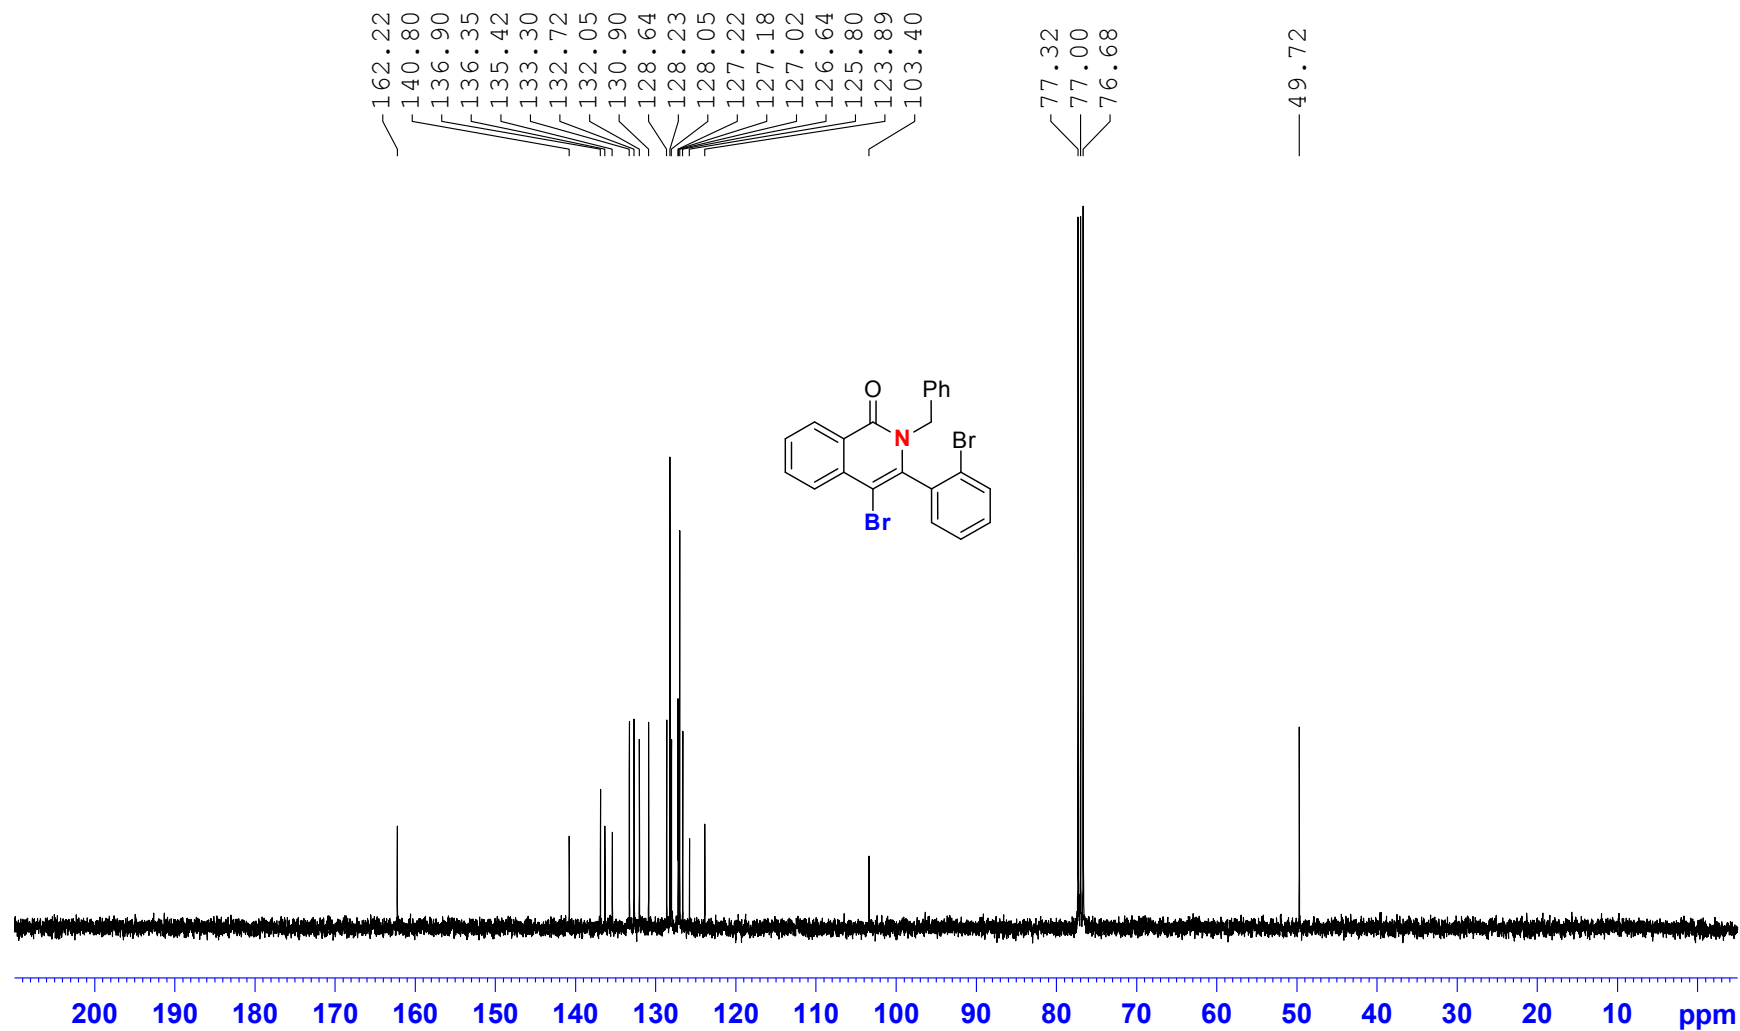

#### 4. $^1\text{H}$ and $^{13}\text{C}$ NMR spectrum of new compounds

$^1\text{H}$  NMR spectrum of **3ja** (400 MHz,  $\text{CDCl}_3$ )

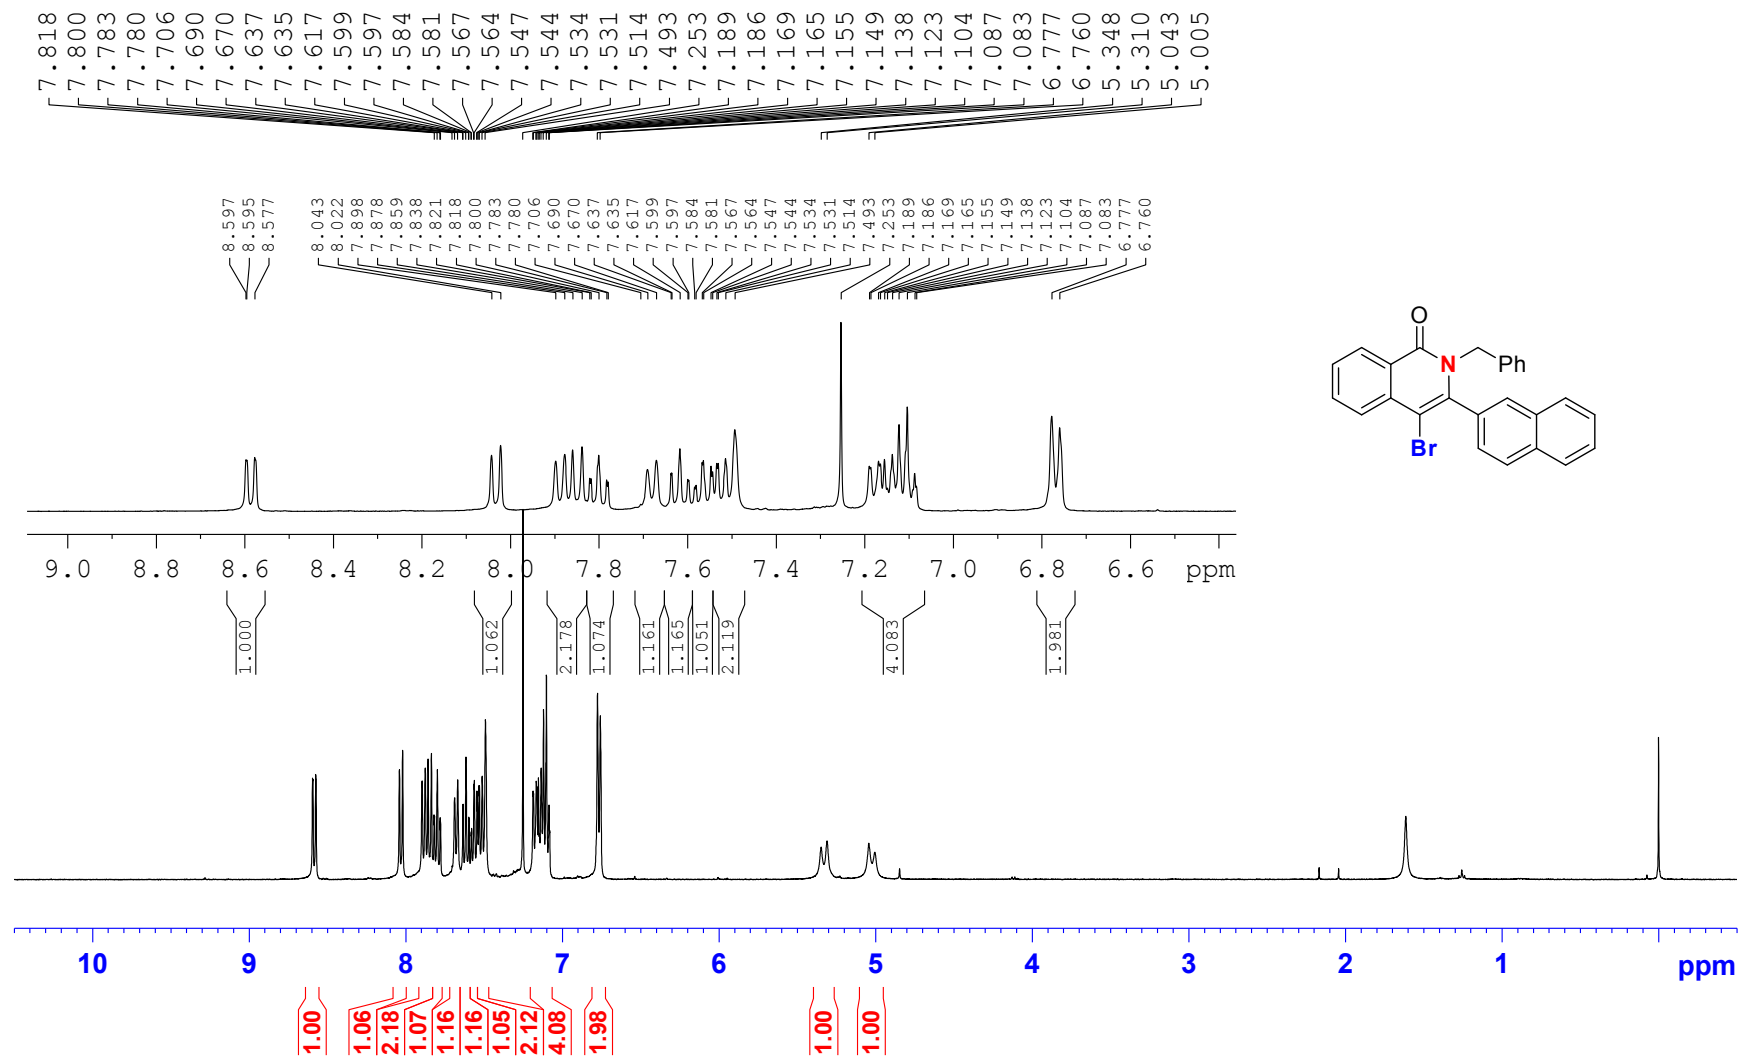

#### 4. $^1\text{H}$ and $^{13}\text{C}$ NMR spectrum of new compounds

$^{13}\text{C}$  NMR spectrum of **3ja** (400 MHz,  $\text{CDCl}_3$ )

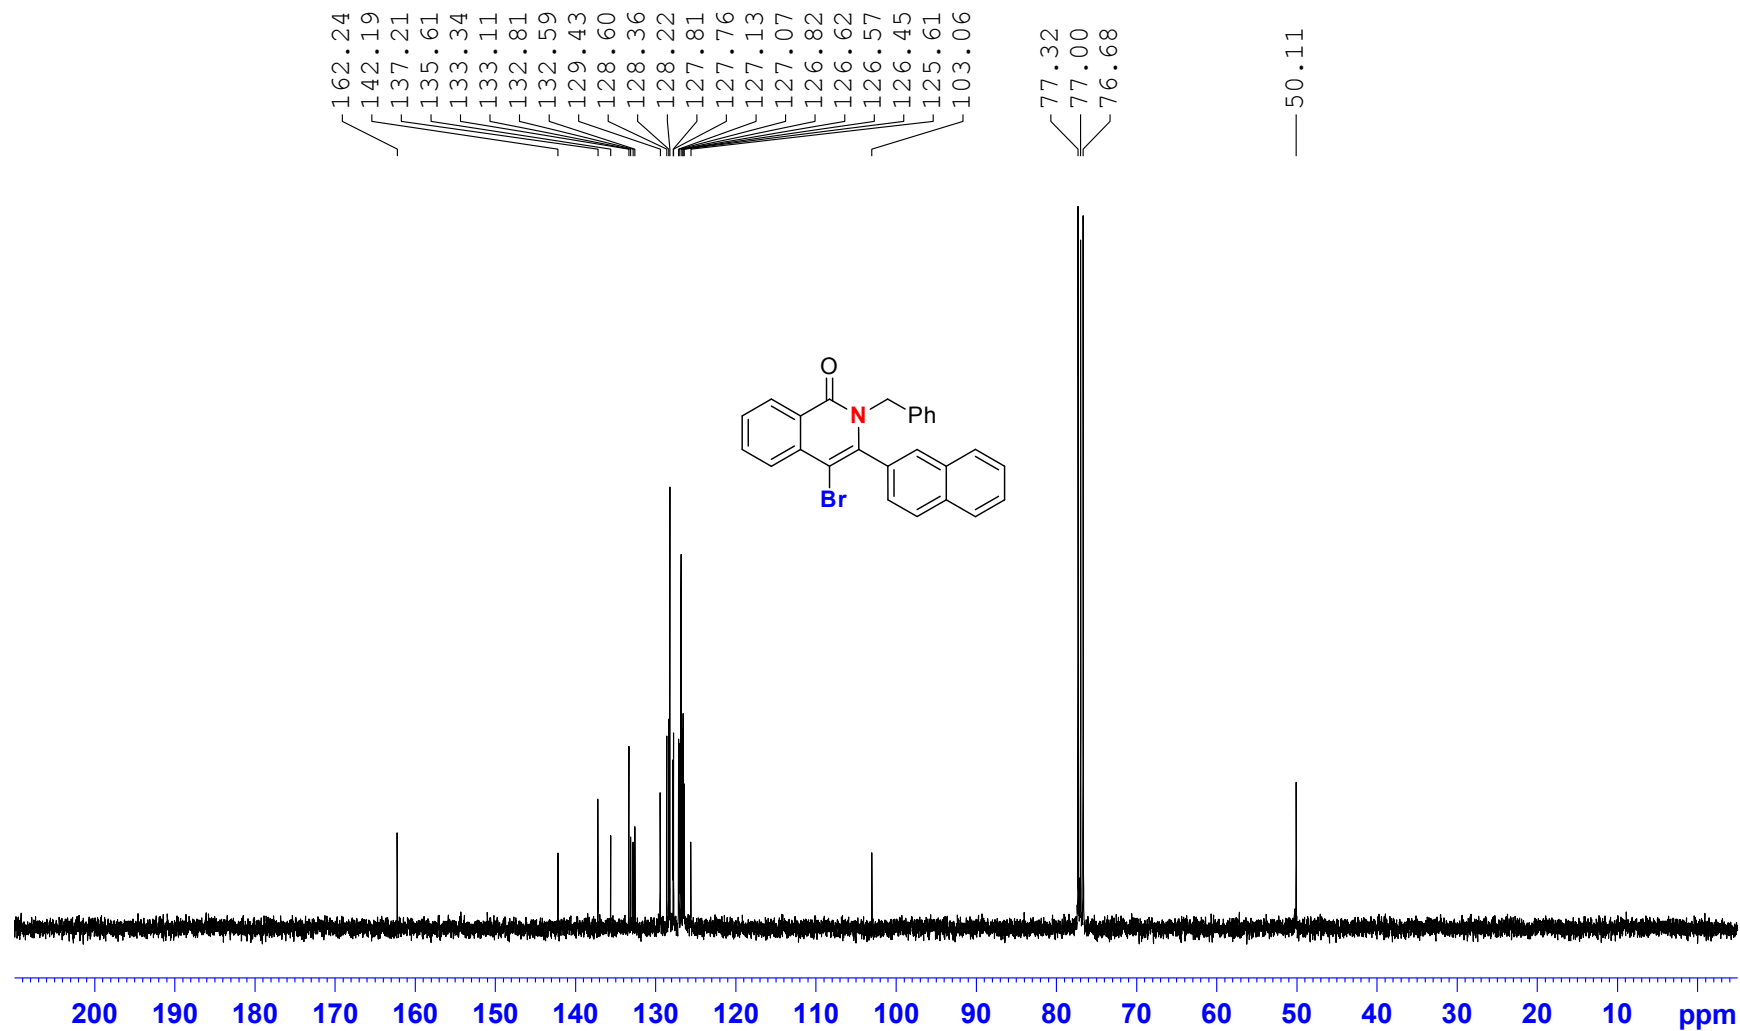

#### 4. $^1\text{H}$ and $^{13}\text{C}$ NMR spectrum of new compounds

$^1\text{H}$  NMR spectrum of **3ka** (400 MHz,  $\text{CDCl}_3$ )

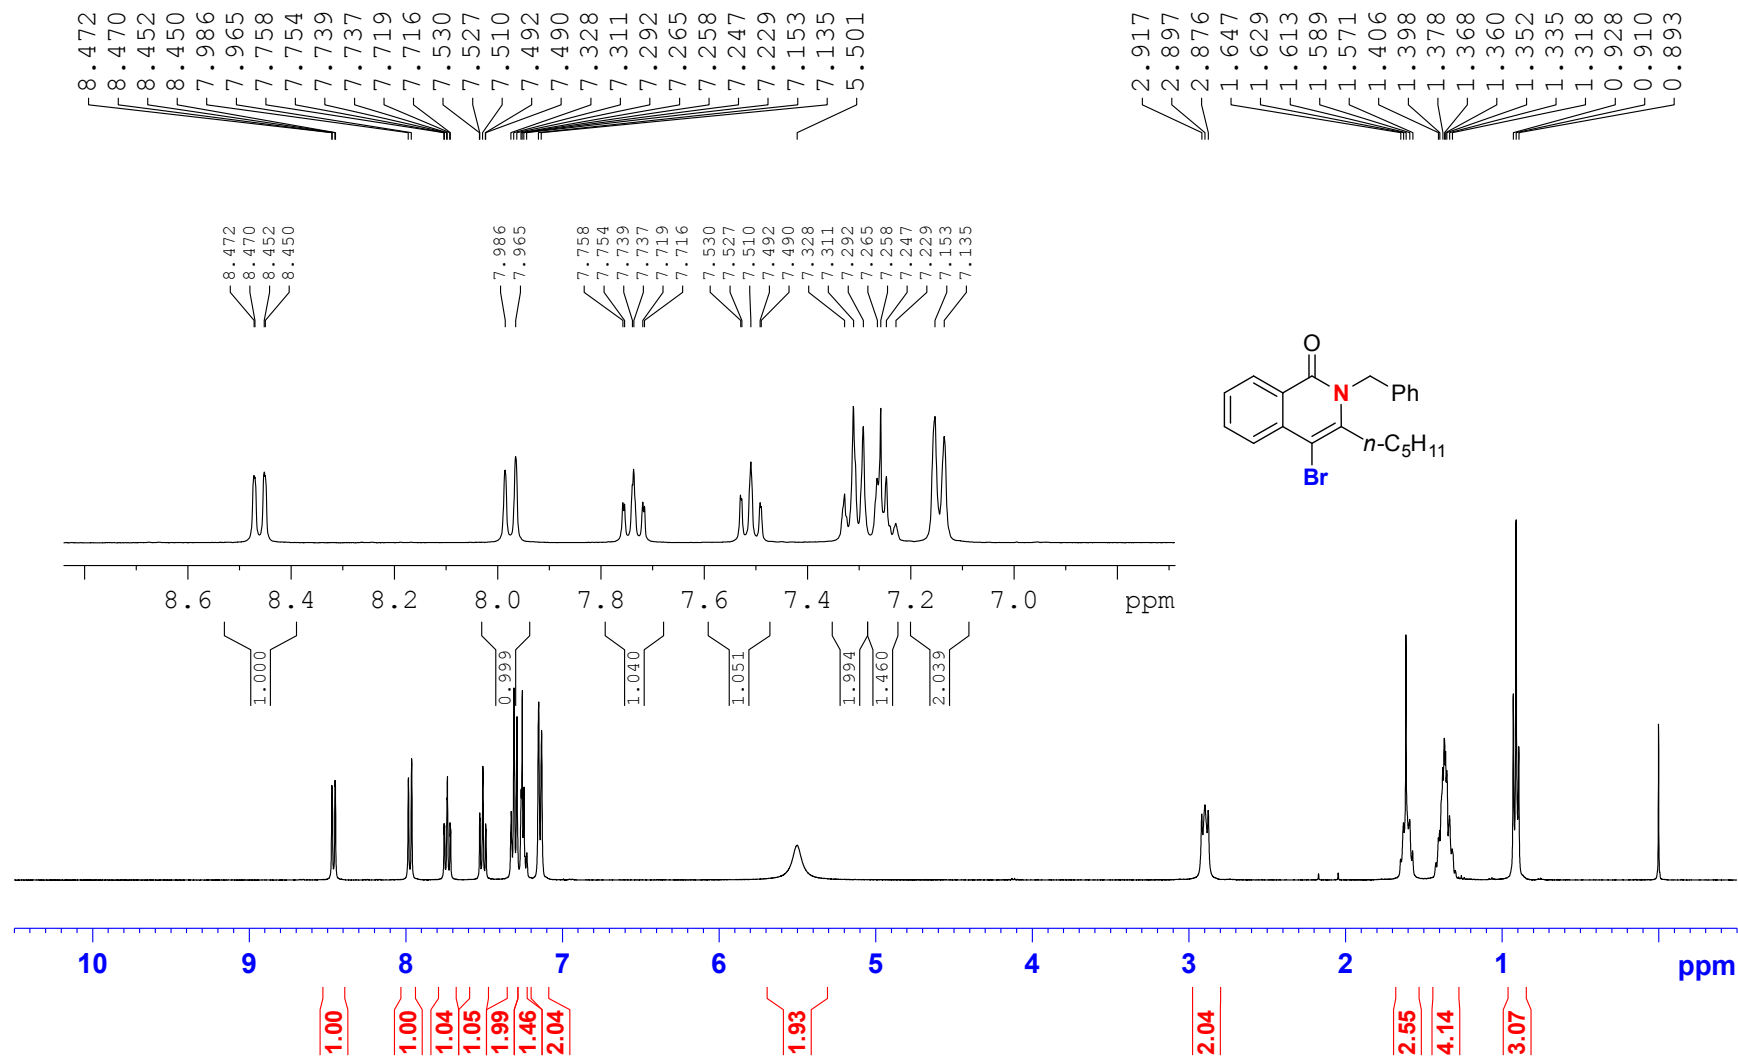

#### 4. $^1\text{H}$ and $^{13}\text{C}$ NMR spectrum of new compounds

$^{13}\text{C}$  NMR spectrum of **3ka** (100 MHz,  $\text{CDCl}_3$ )

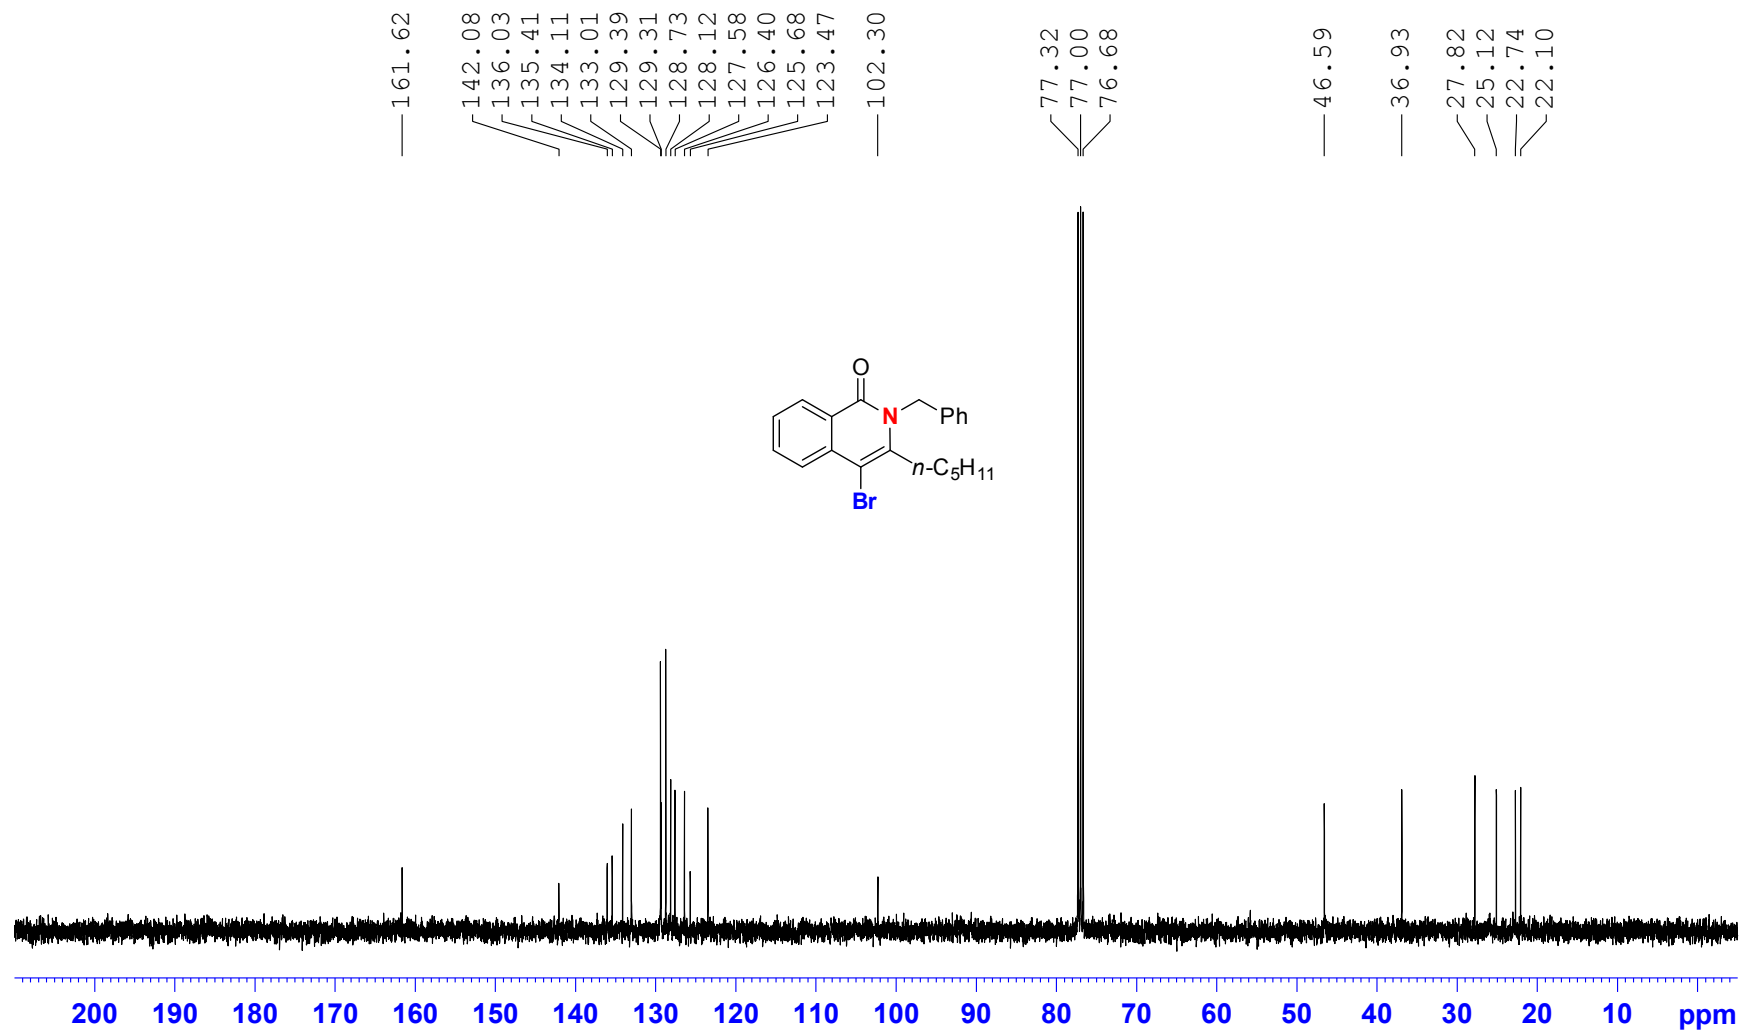

#### 4. $^1\text{H}$ and $^{13}\text{C}$ NMR spectrum of new compounds

$^1\text{H}$  NMR spectrum of **3la** (400 MHz,  $\text{CDCl}_3$ )

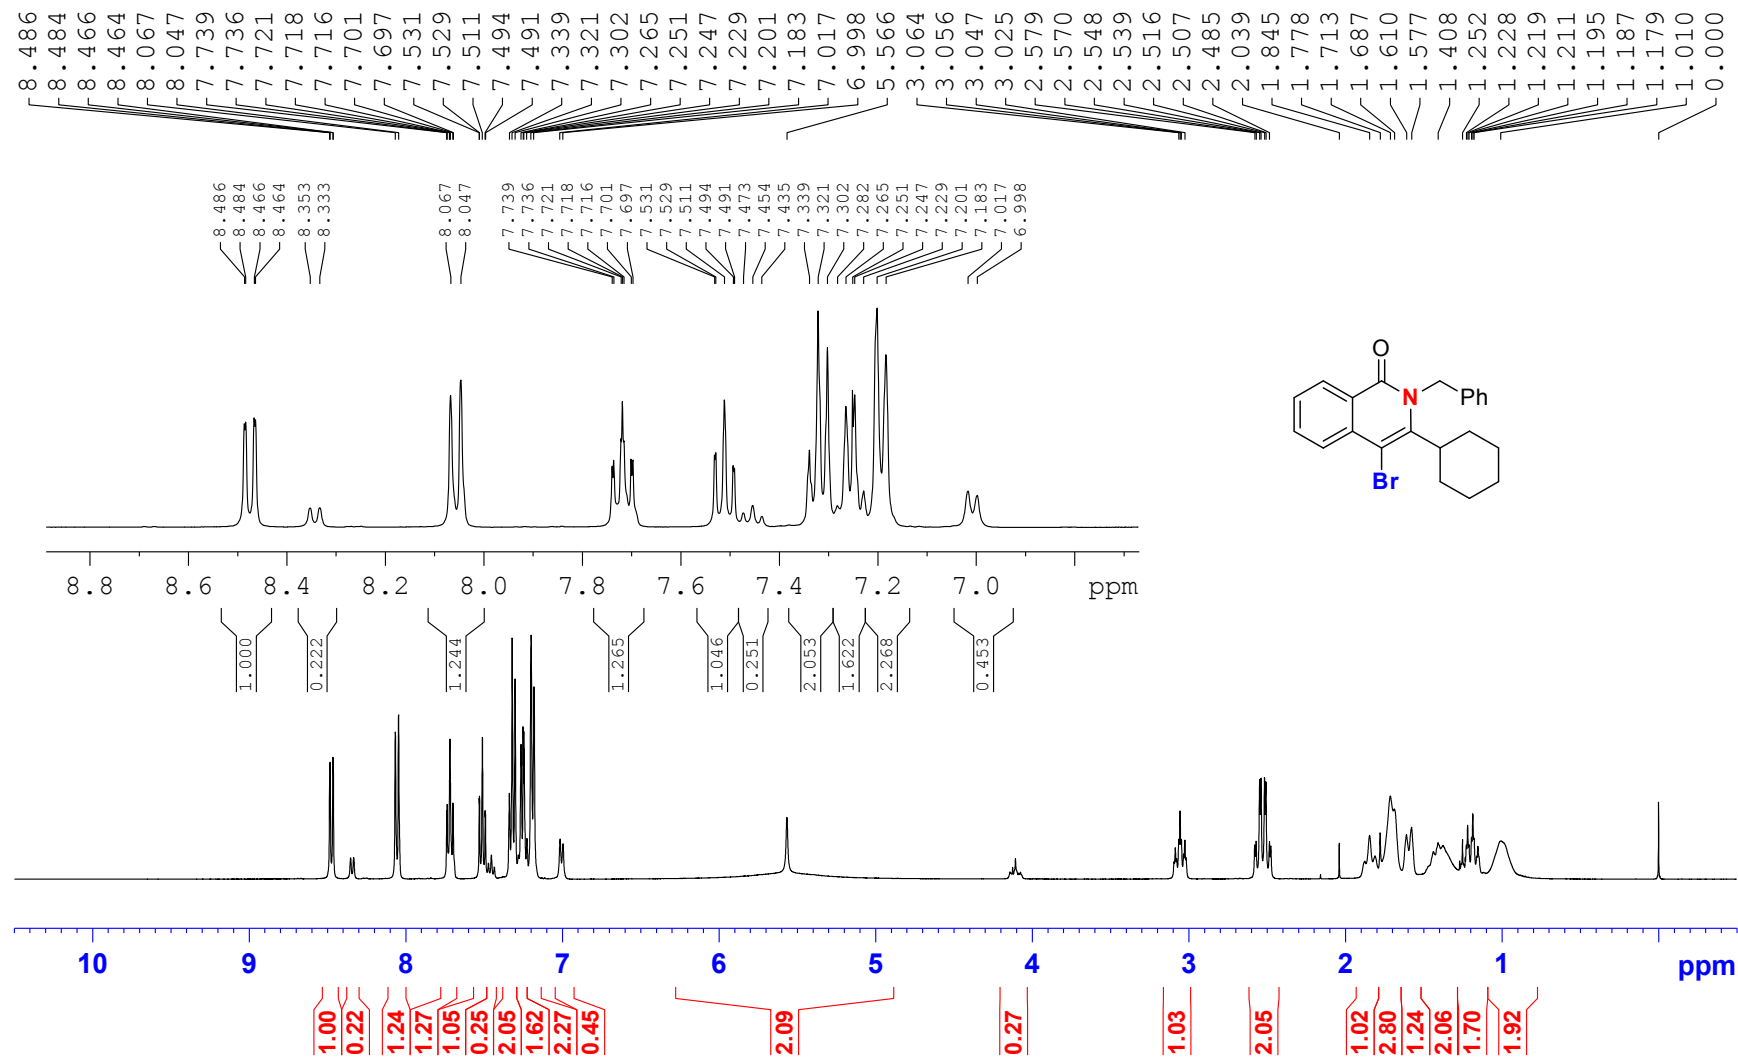



#### 4. $^1\text{H}$ and $^{13}\text{C}$ NMR spectrum of new compounds

$^{13}\text{C}$  NMR spectrum of **3la** (100 MHz,  $\text{CDCl}_3$ )

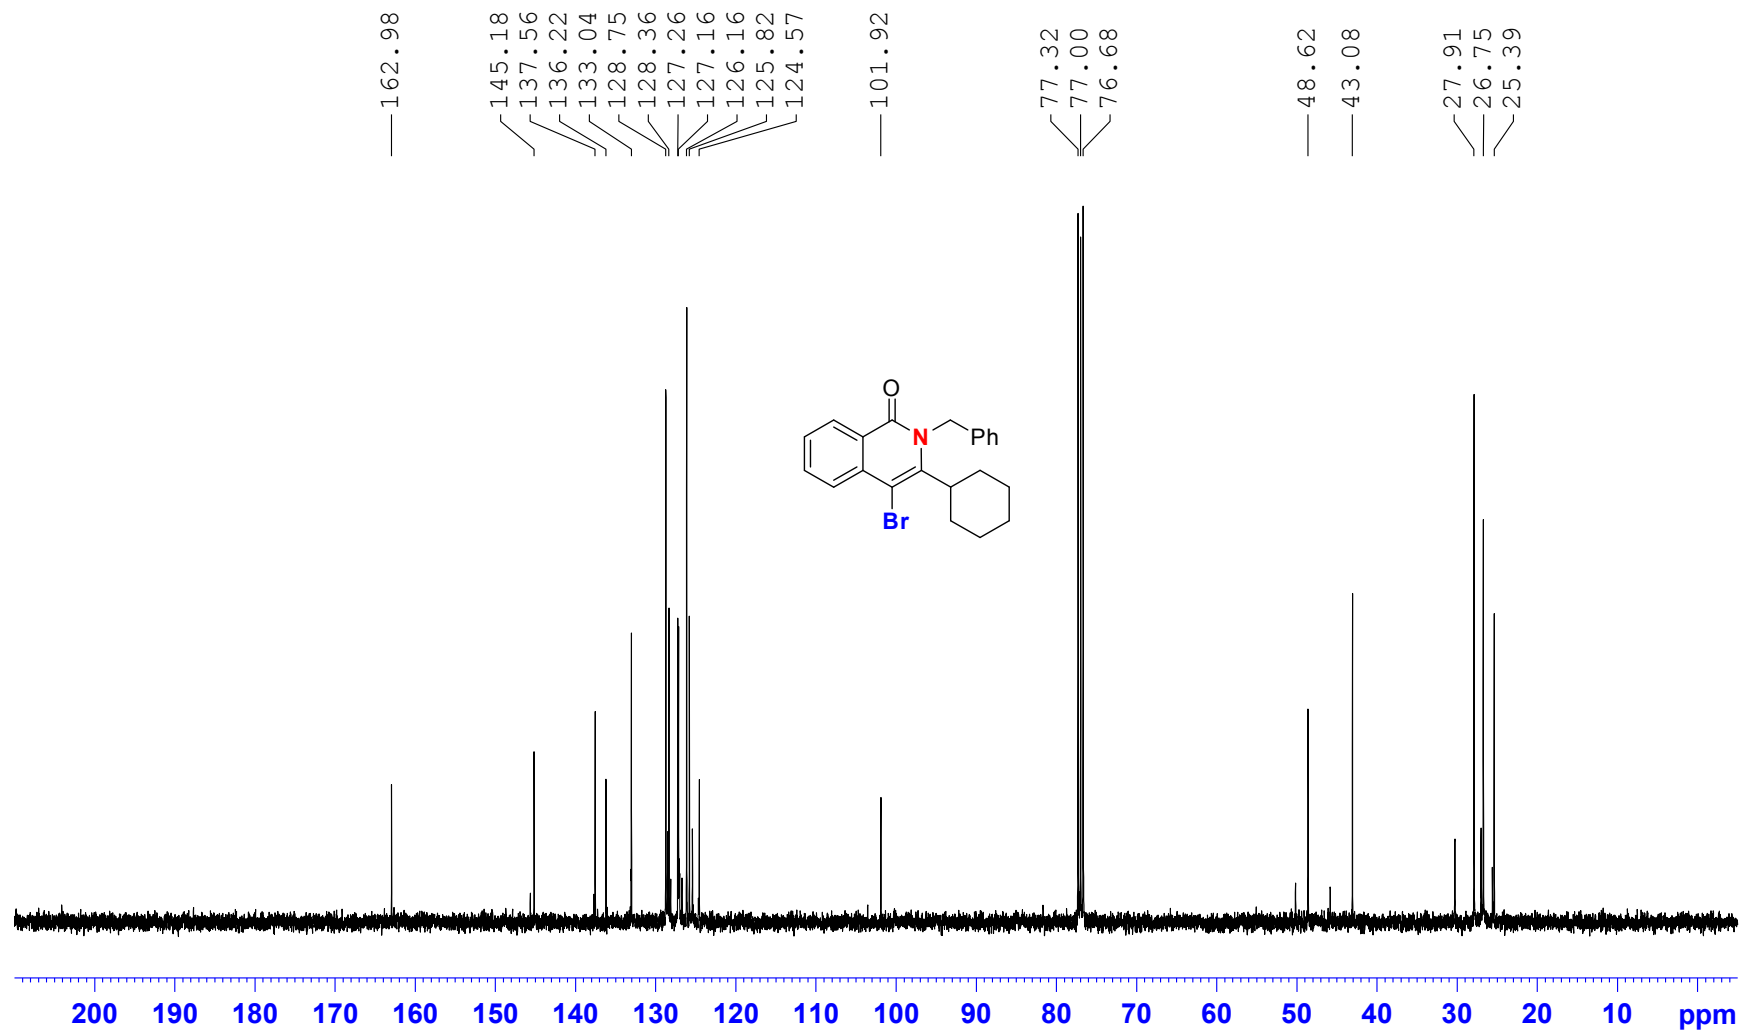

#### 4. $^1\text{H}$ and $^{13}\text{C}$ NMR spectrum of new compounds

$^1\text{H}$  NMR spectrum of **3ma** (400 MHz,  $\text{CDCl}_3$ )

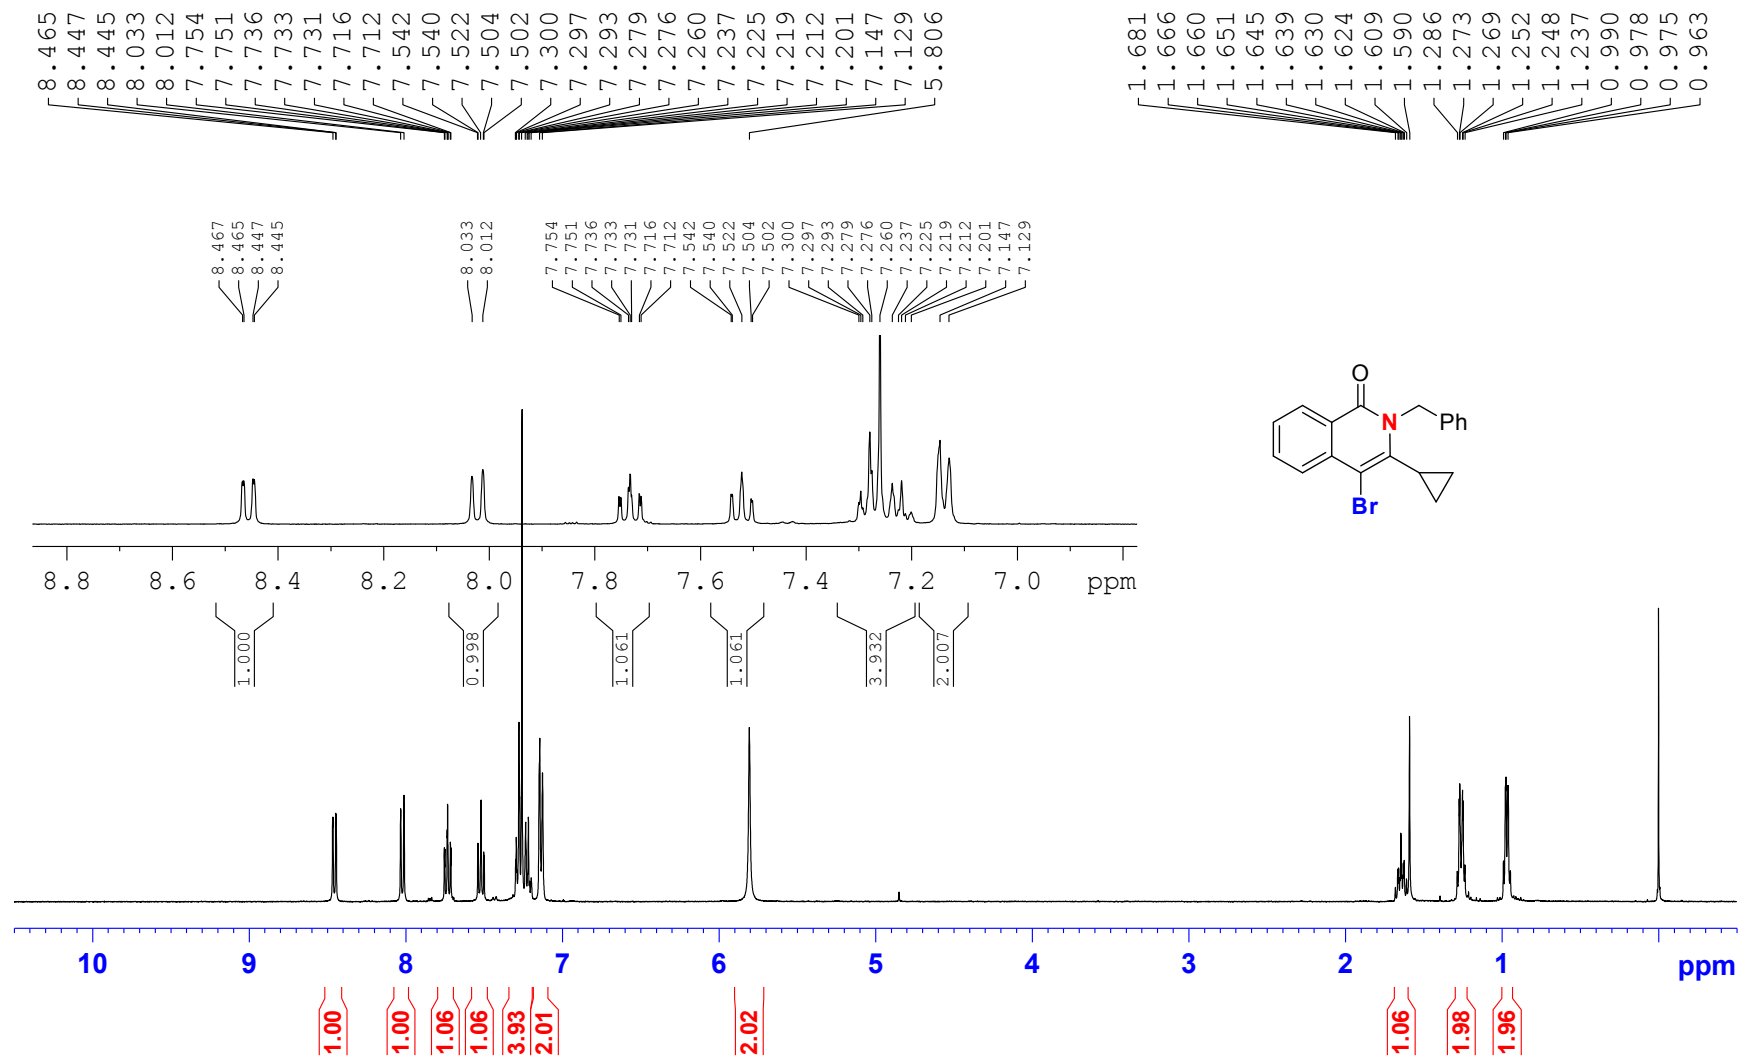

#### 4. $^1\text{H}$ and $^{13}\text{C}$ NMR spectrum of new compounds

$^{13}\text{C}$  NMR spectrum of **3ma** (100 MHz,  $\text{CDCl}_3$ )

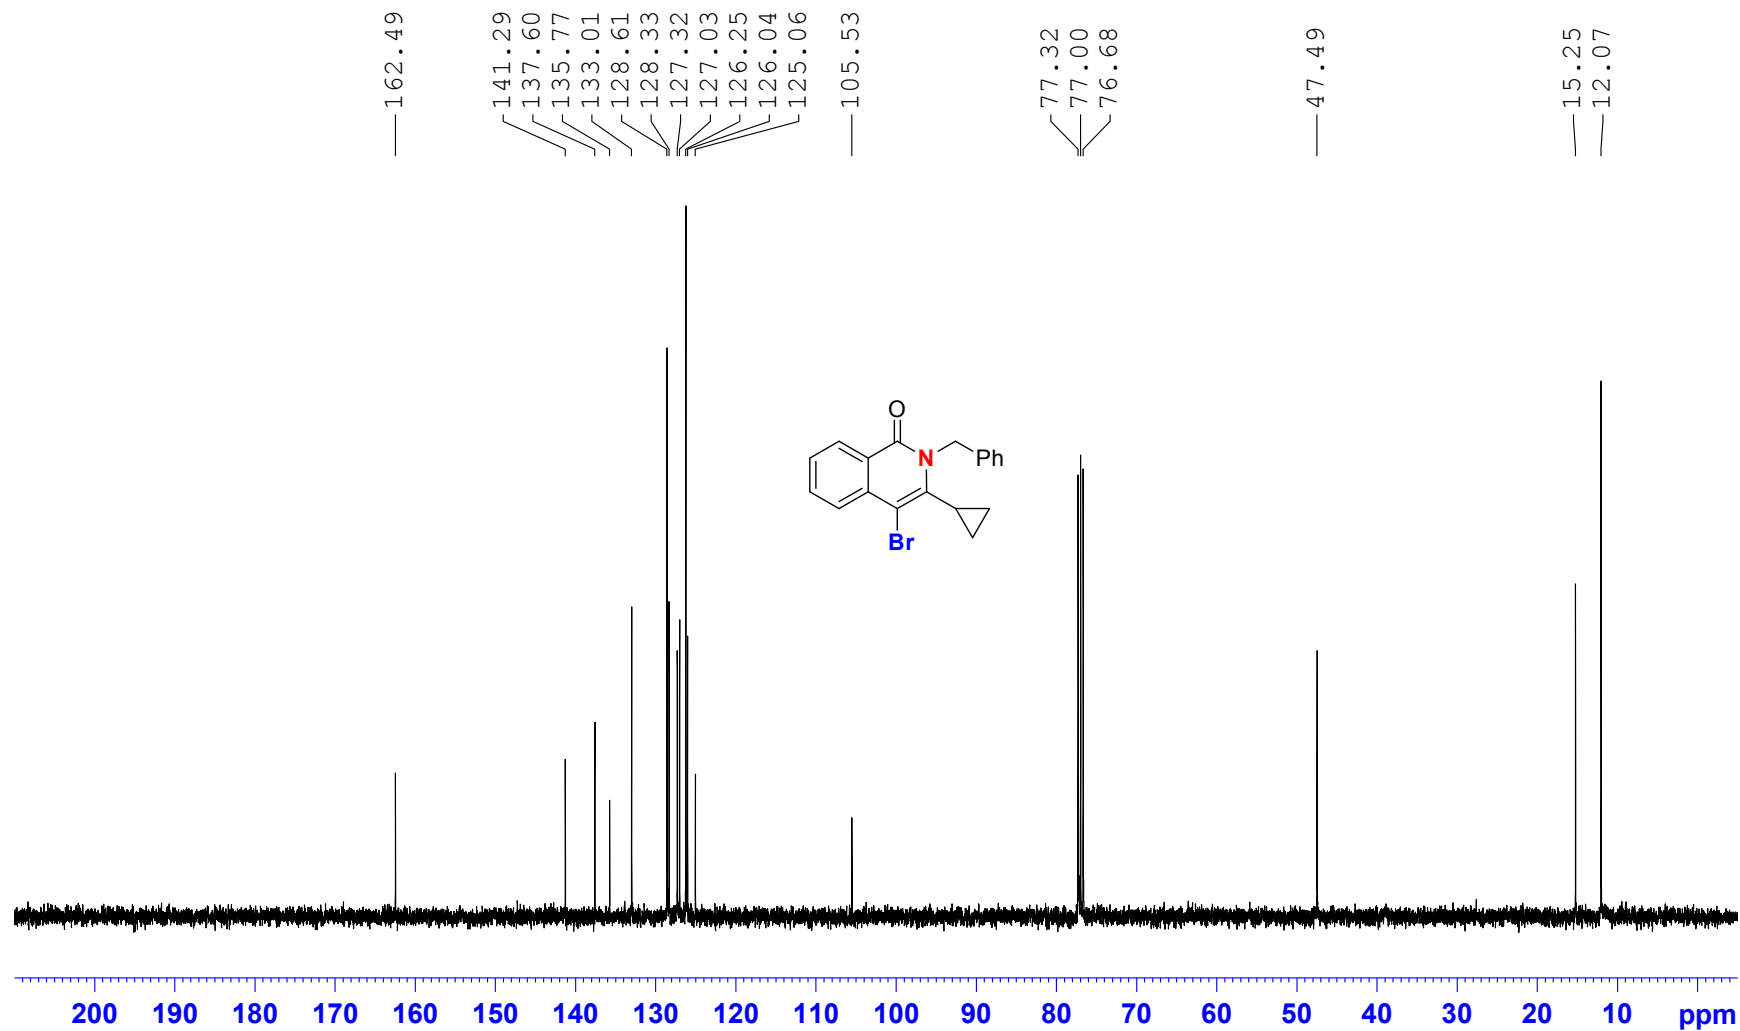

#### 4. $^1\text{H}$ and $^{13}\text{C}$ NMR spectrum of new compounds

$^1\text{H}$  NMR spectrum of **3na** (400 MHz,  $\text{CDCl}_3$ )

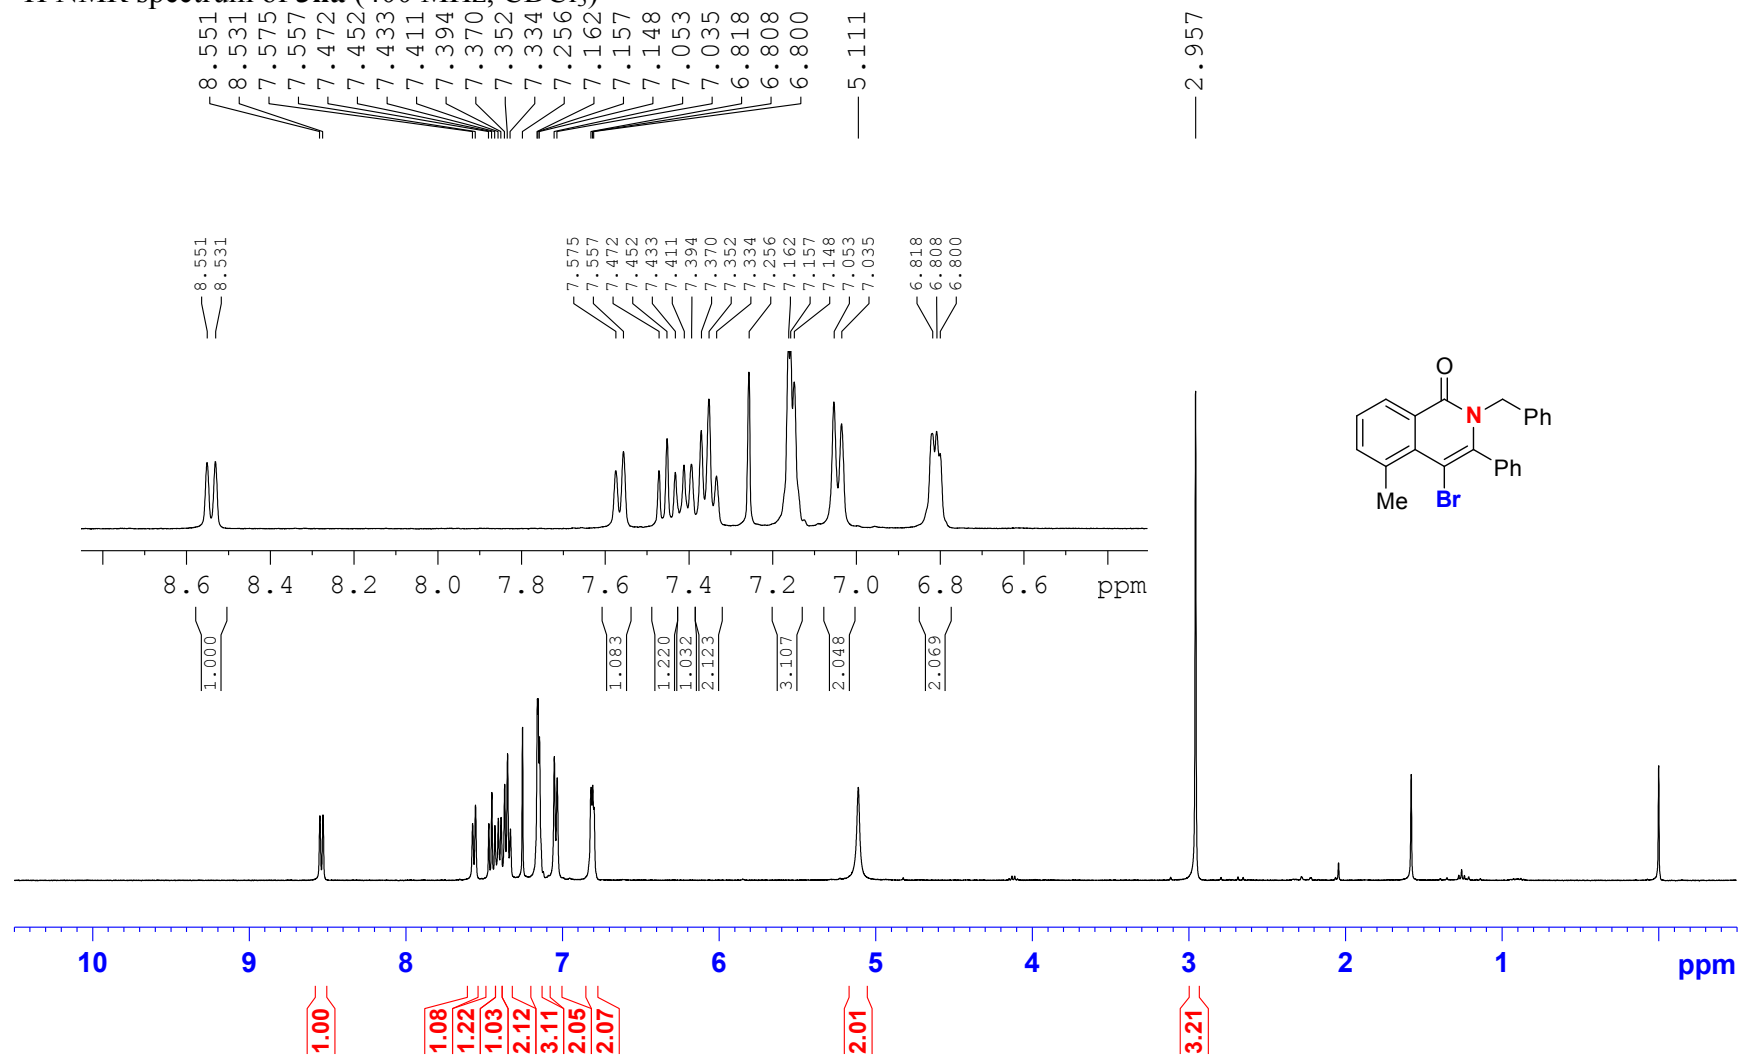

#### 4. $^1\text{H}$ and $^{13}\text{C}$ NMR spectrum of new compounds

$^{13}\text{C}$  NMR spectrum of **3na** (100 MHz,  $\text{CDCl}_3$ )

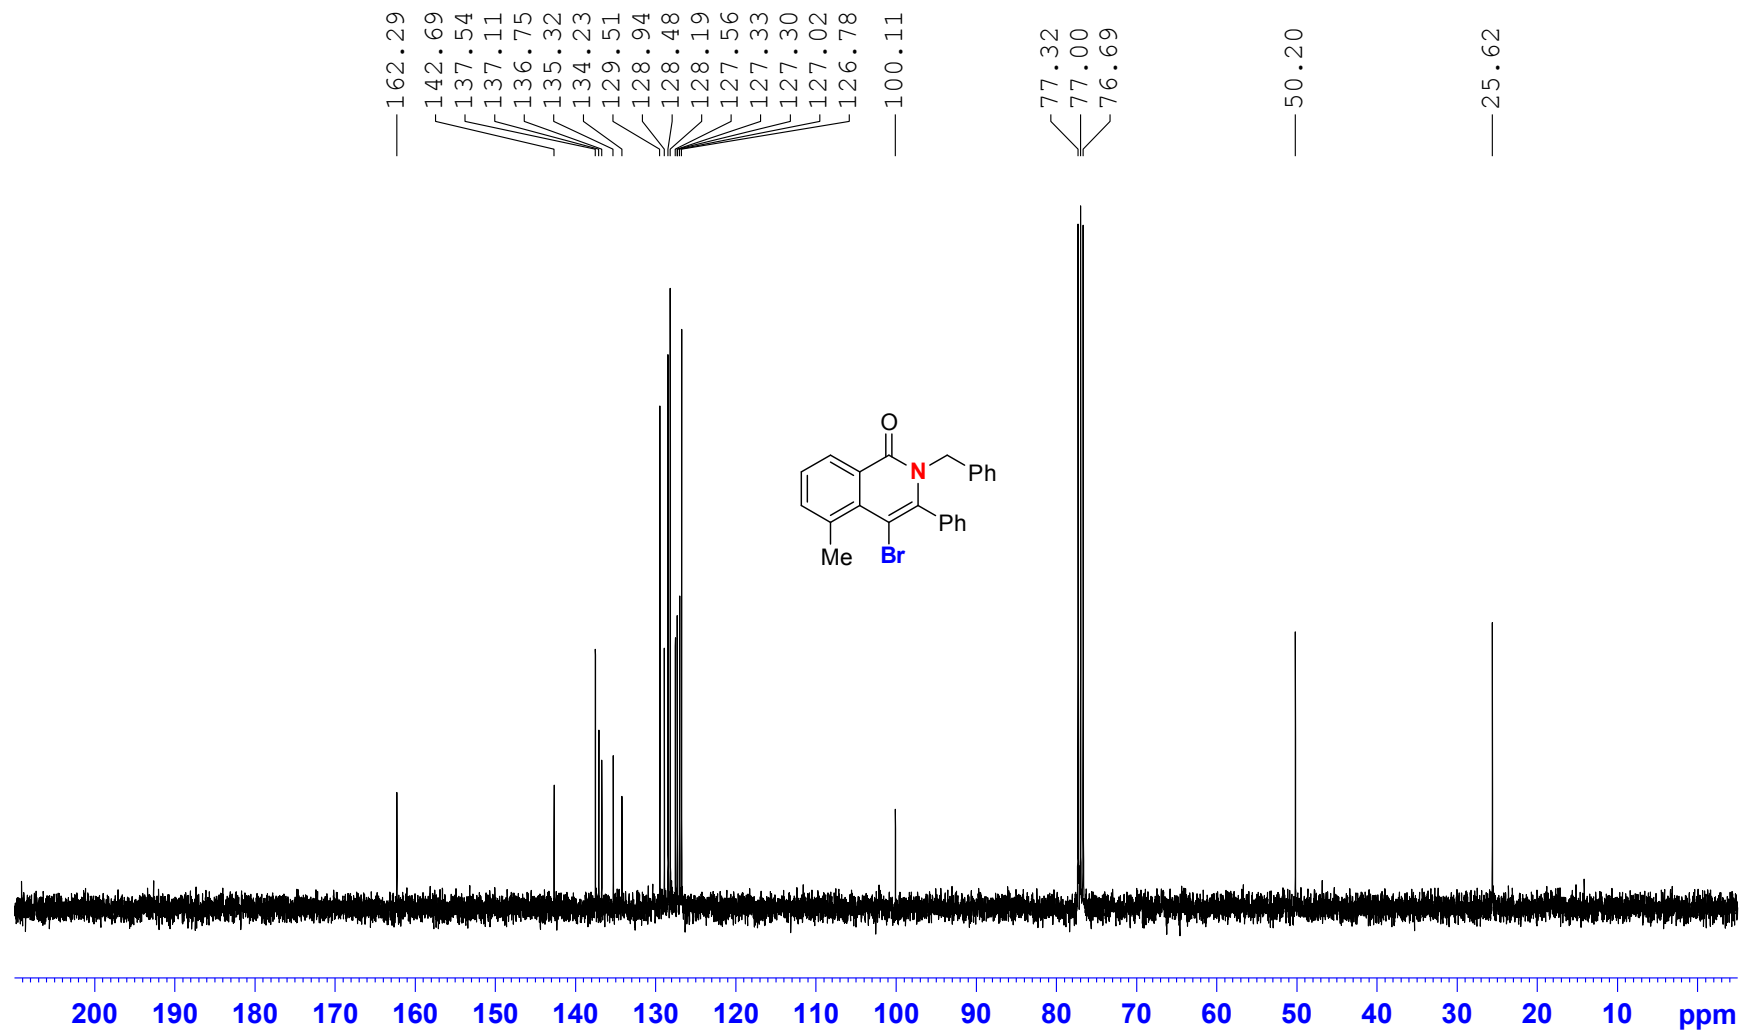

#### 4. $^1\text{H}$ and $^{13}\text{C}$ NMR spectrum of new compounds

$^1\text{H}$  NMR spectrum of **30a** (400 MHz,  $\text{CDCl}_3$ )

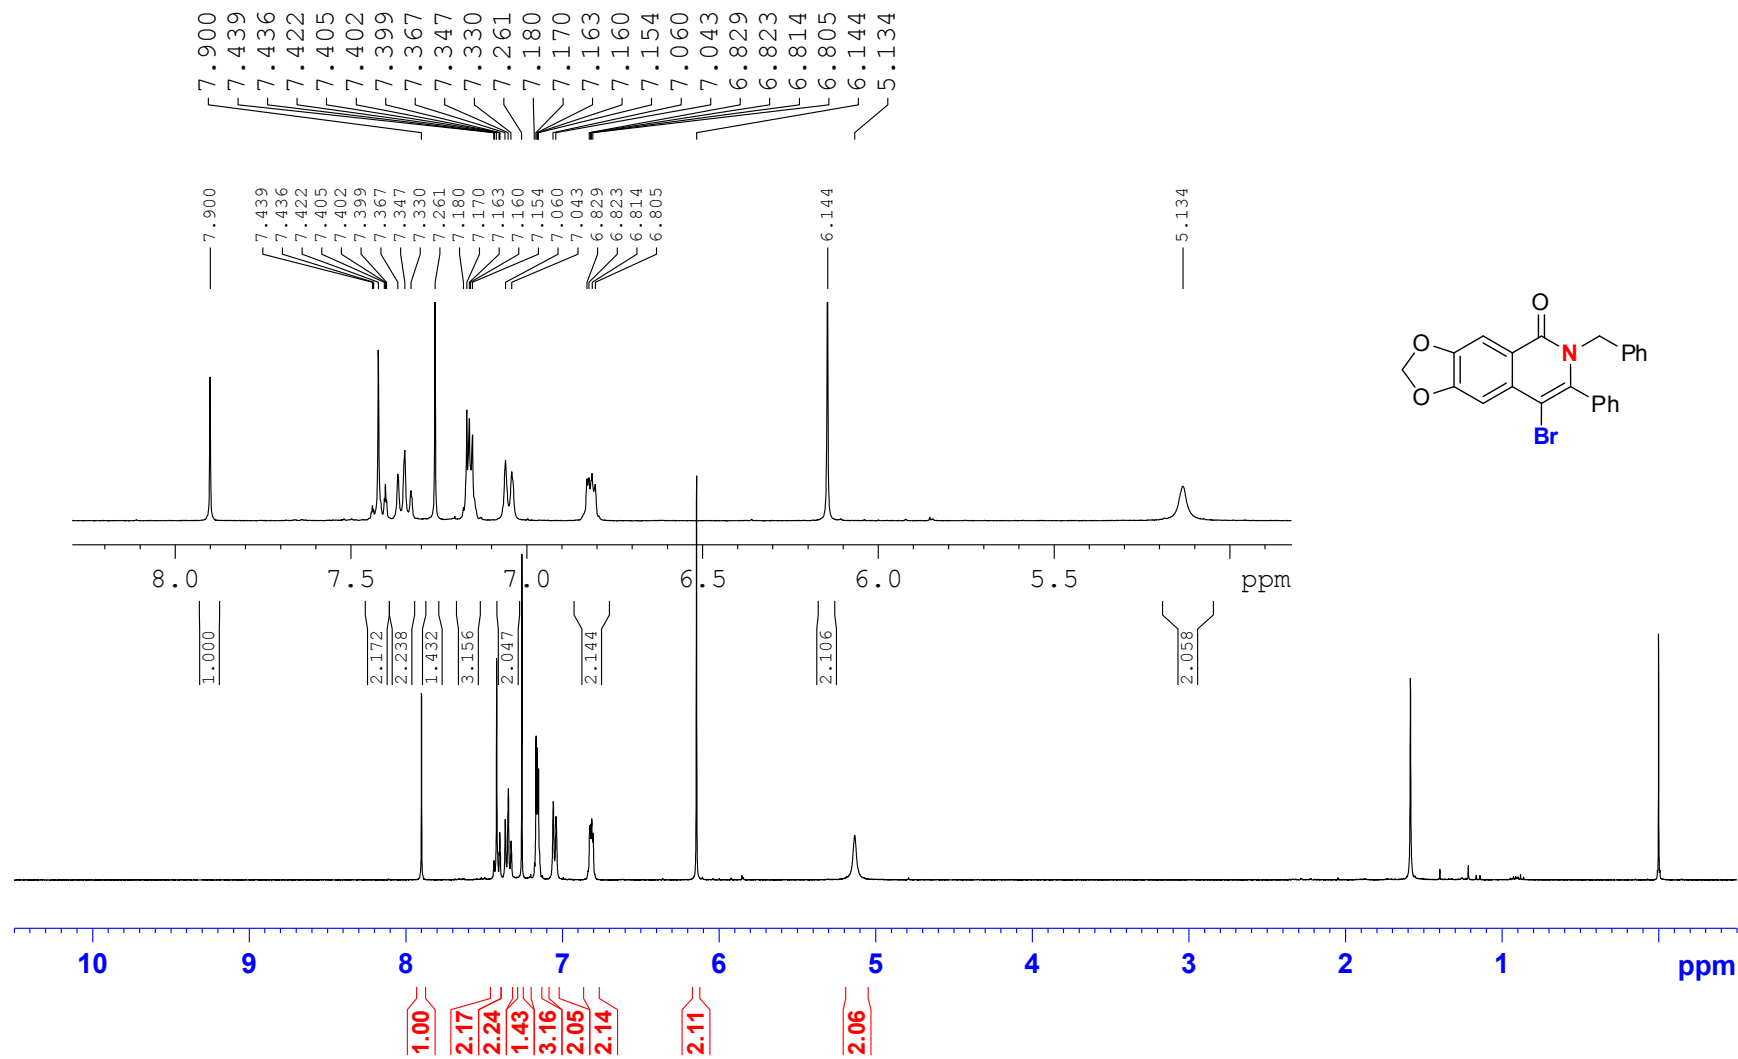

#### 4. $^1\text{H}$ and $^{13}\text{C}$ NMR spectrum of new compounds

$^{13}\text{C}$  NMR spectrum of **30a** (100 MHz,  $\text{CDCl}_3$ )

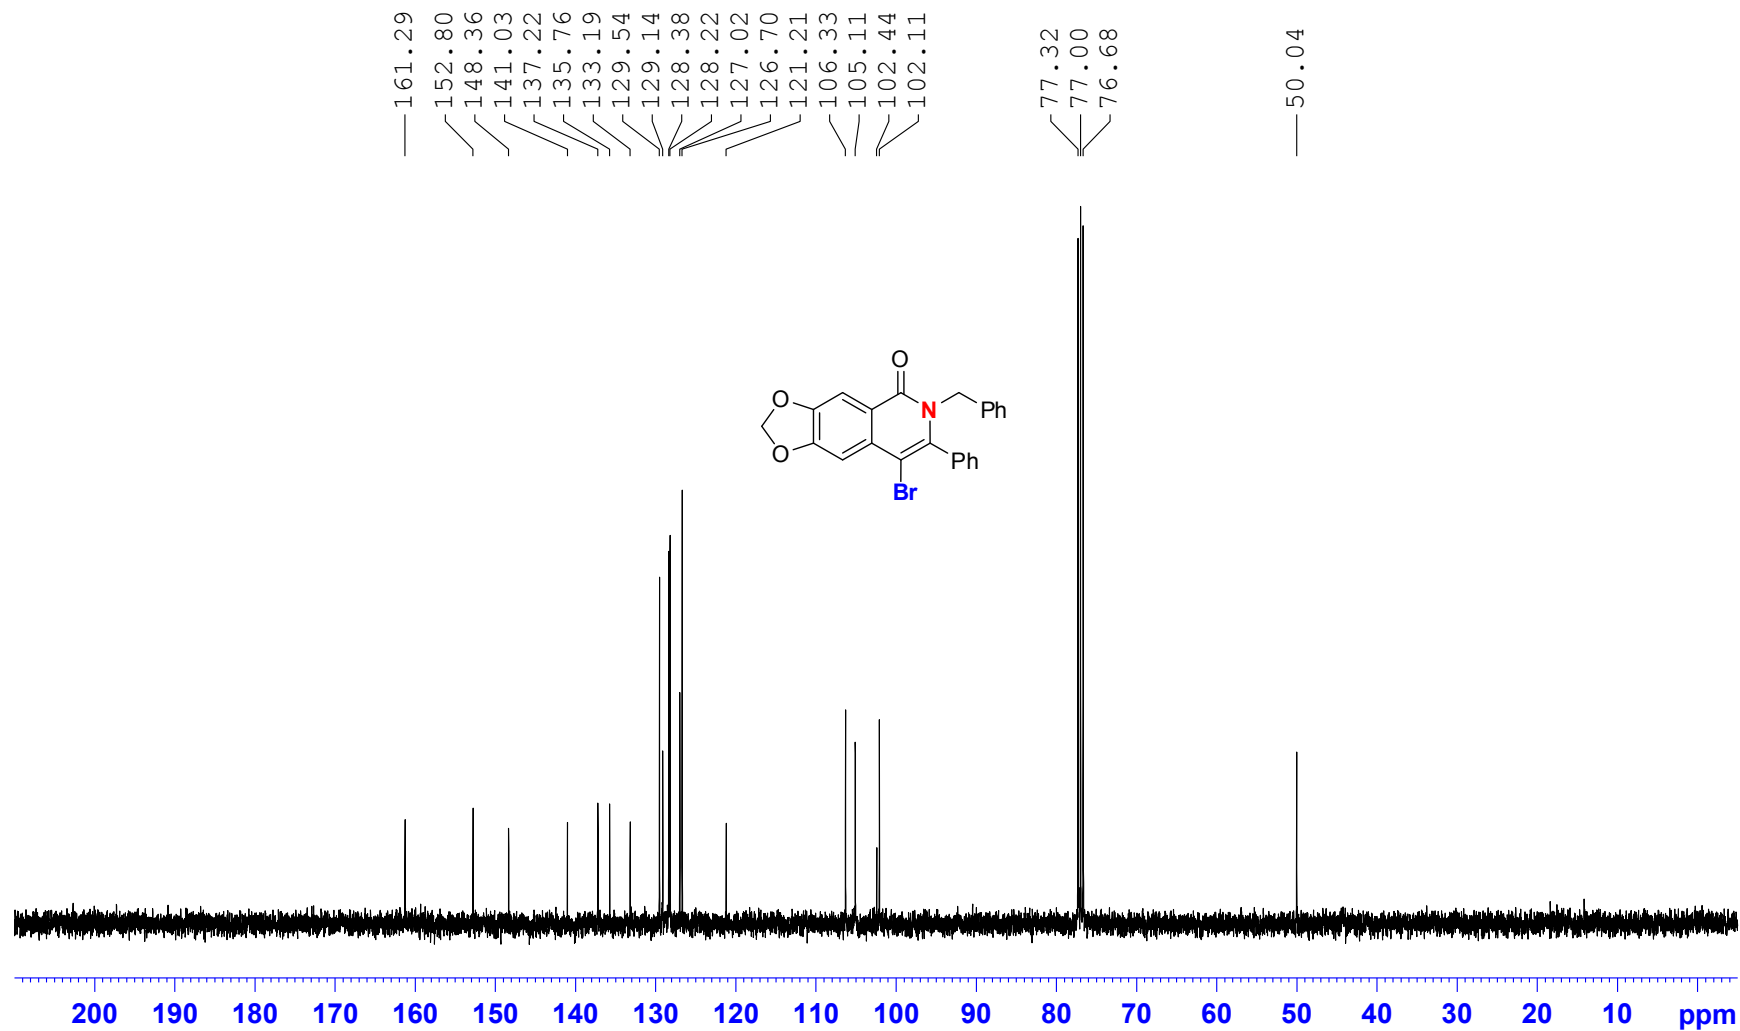

#### 4. $^1\text{H}$ and $^{13}\text{C}$ NMR spectrum of new compounds

$^1\text{H}$  NMR spectrum of **3pa** (400 MHz,  $\text{CDCl}_3$ )

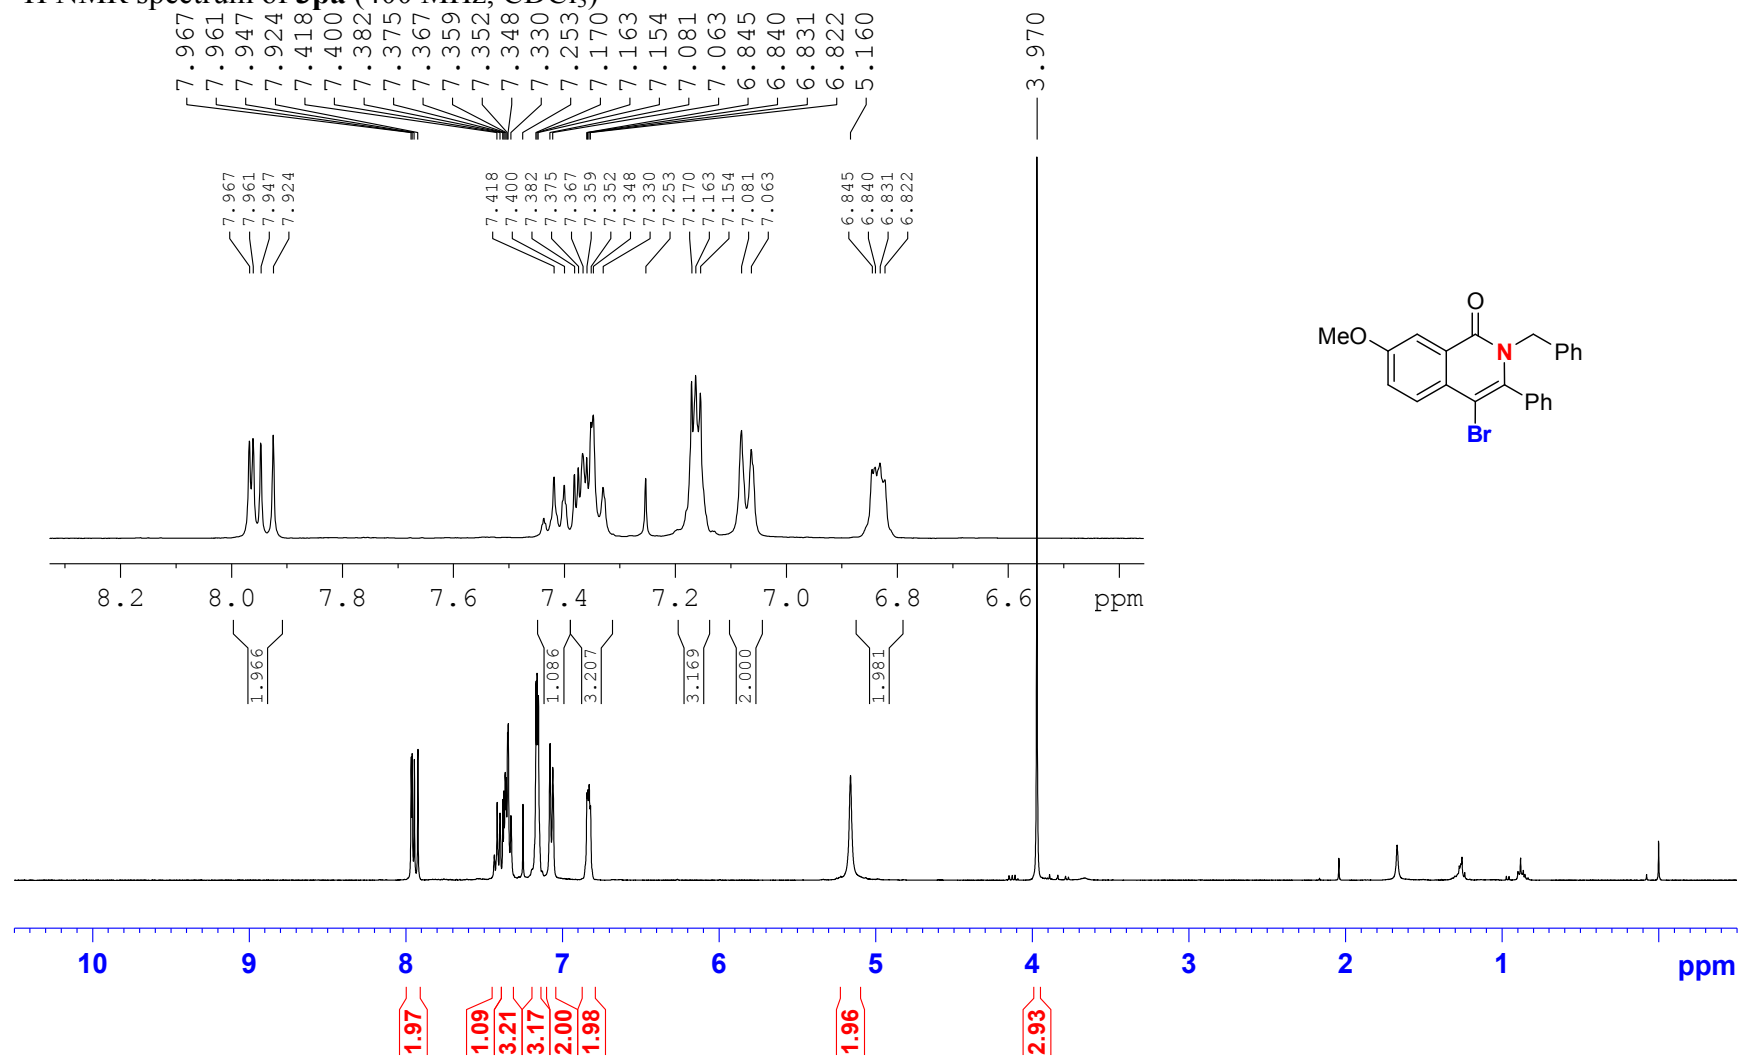



#### 4. $^1\text{H}$ and $^{13}\text{C}$ NMR spectrum of new compounds

$^{13}\text{C}$  NMR spectrum of **3pa** (100 MHz,  $\text{CDCl}_3$ )

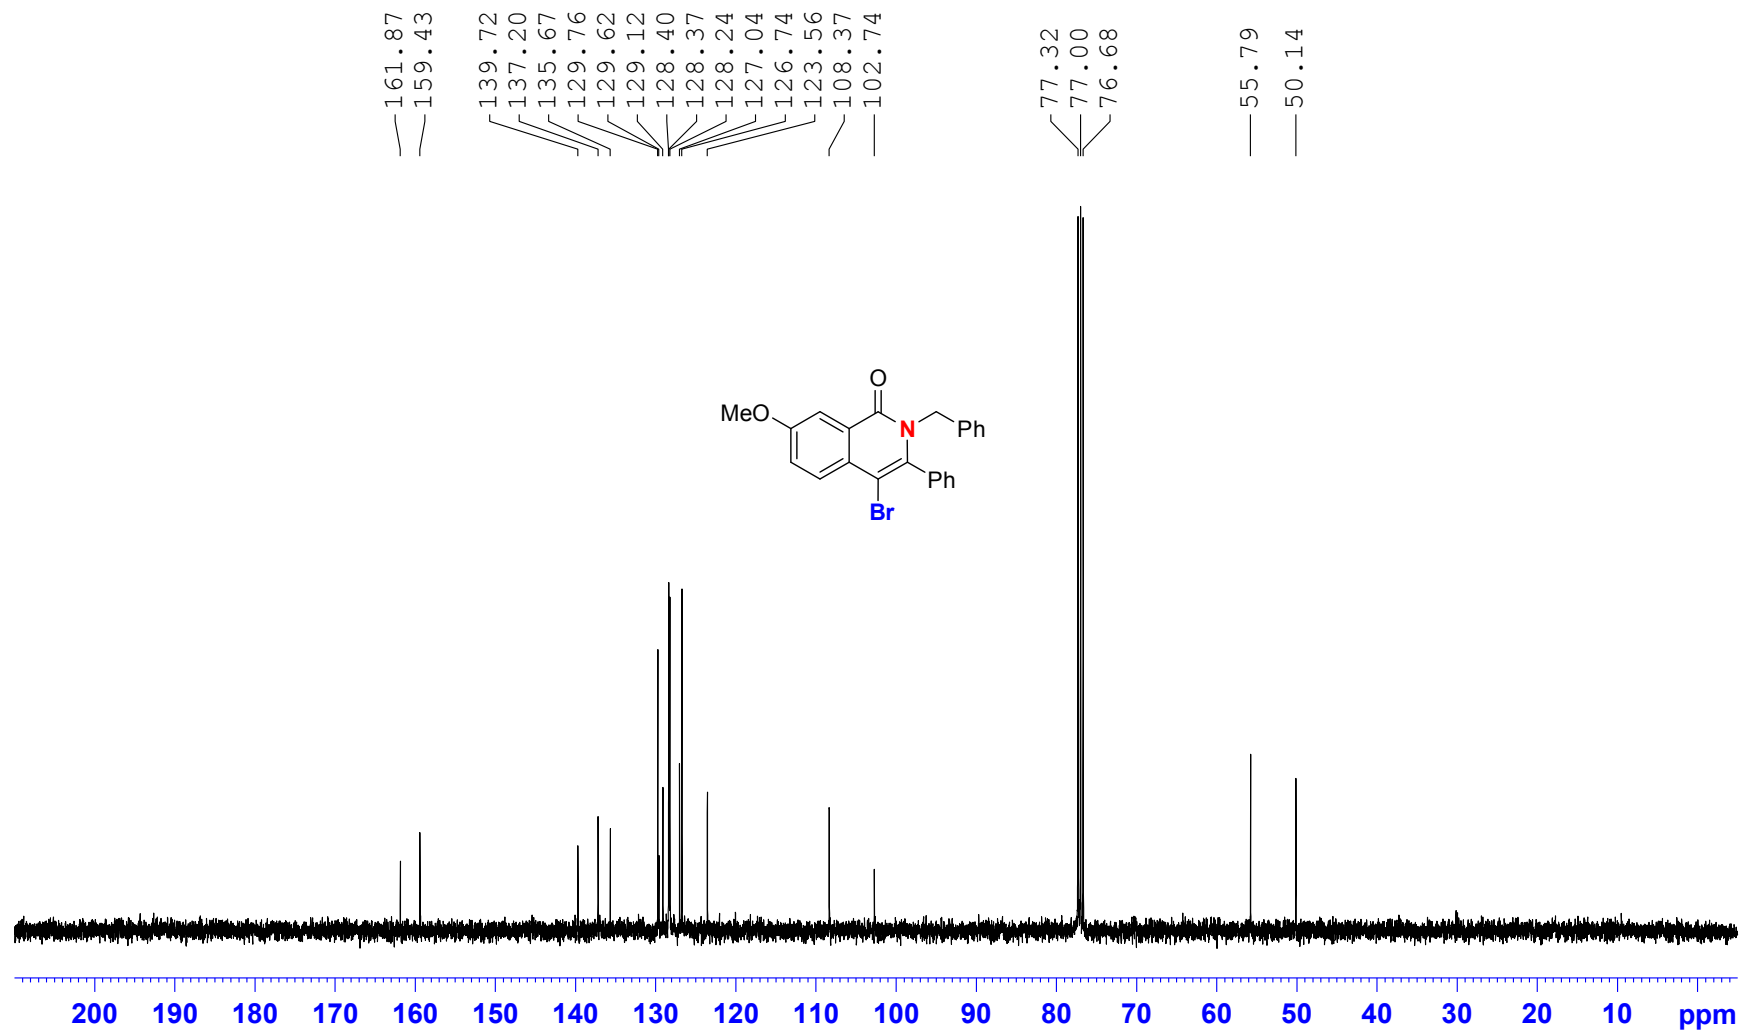

#### 4. $^1\text{H}$ and $^{13}\text{C}$ NMR spectrum of new compounds

$^1\text{H}$  NMR spectrum of **3qa** (400 MHz,  $\text{CDCl}_3$ )

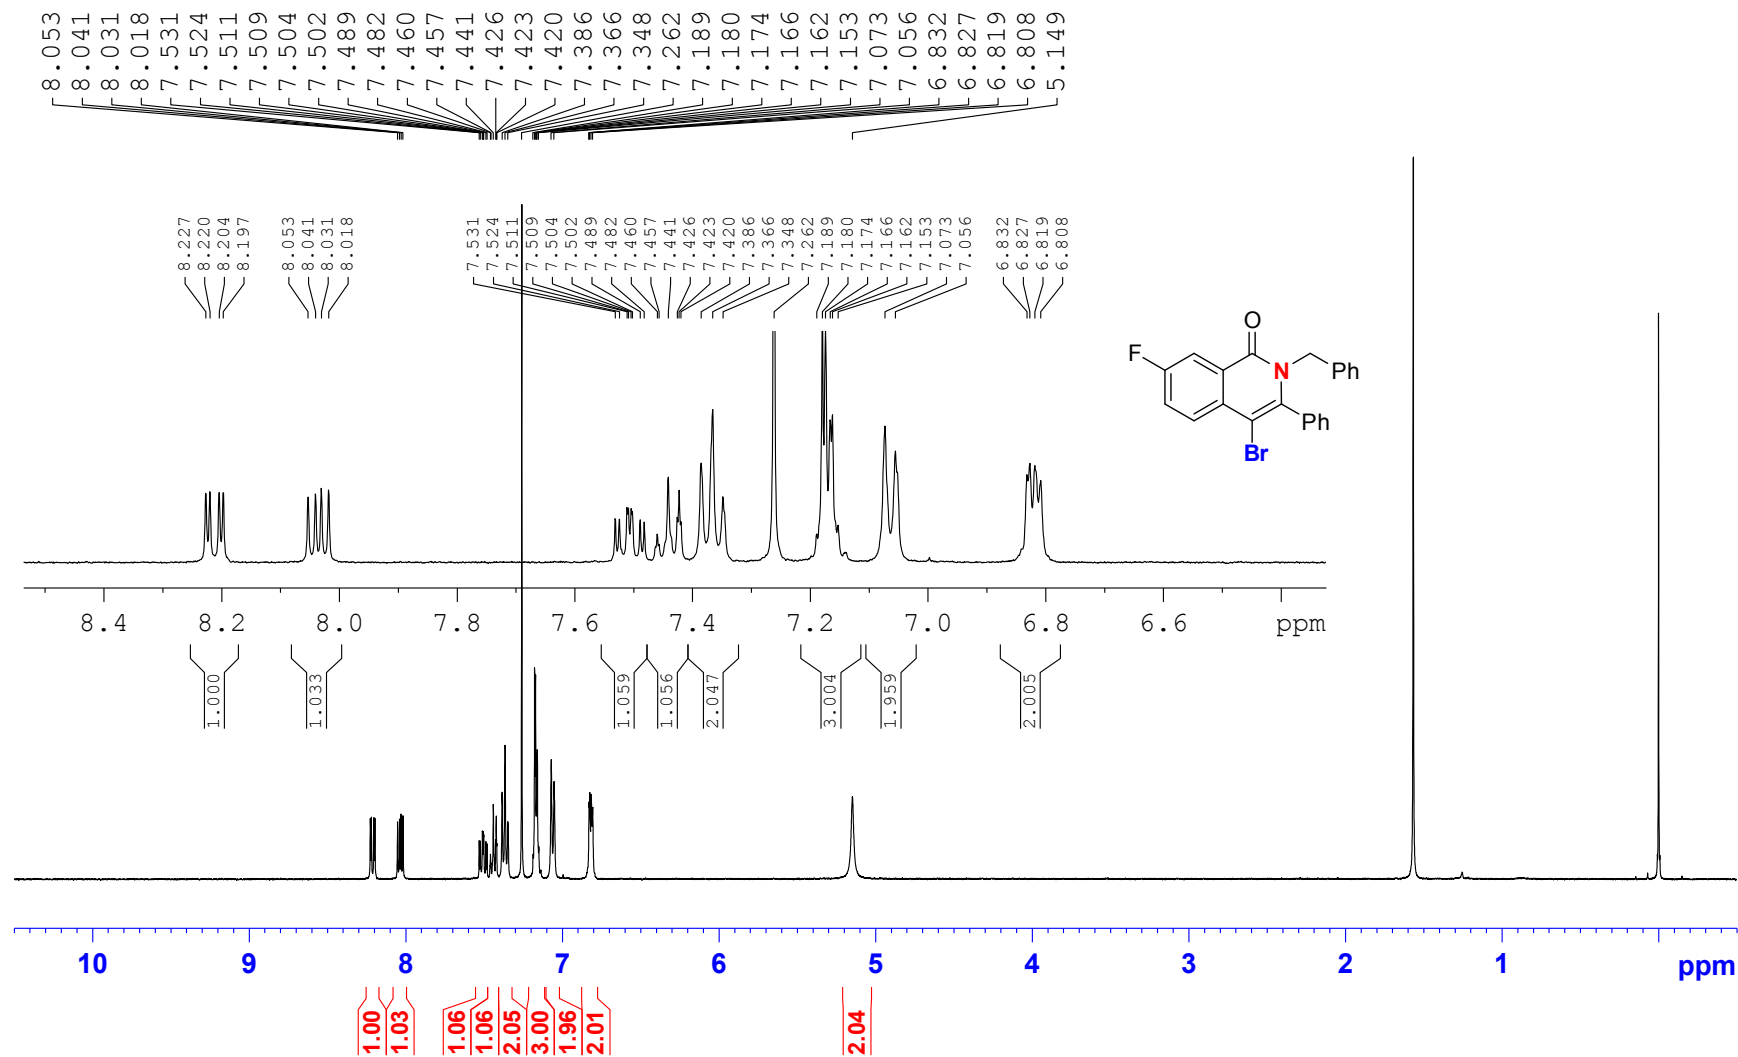

#### 4. $^1\text{H}$ and $^{13}\text{C}$ NMR spectrum of new compounds

$^{13}\text{C}$  NMR spectrum of **3qa** (400 MHz,  $\text{CDCl}_3$ )

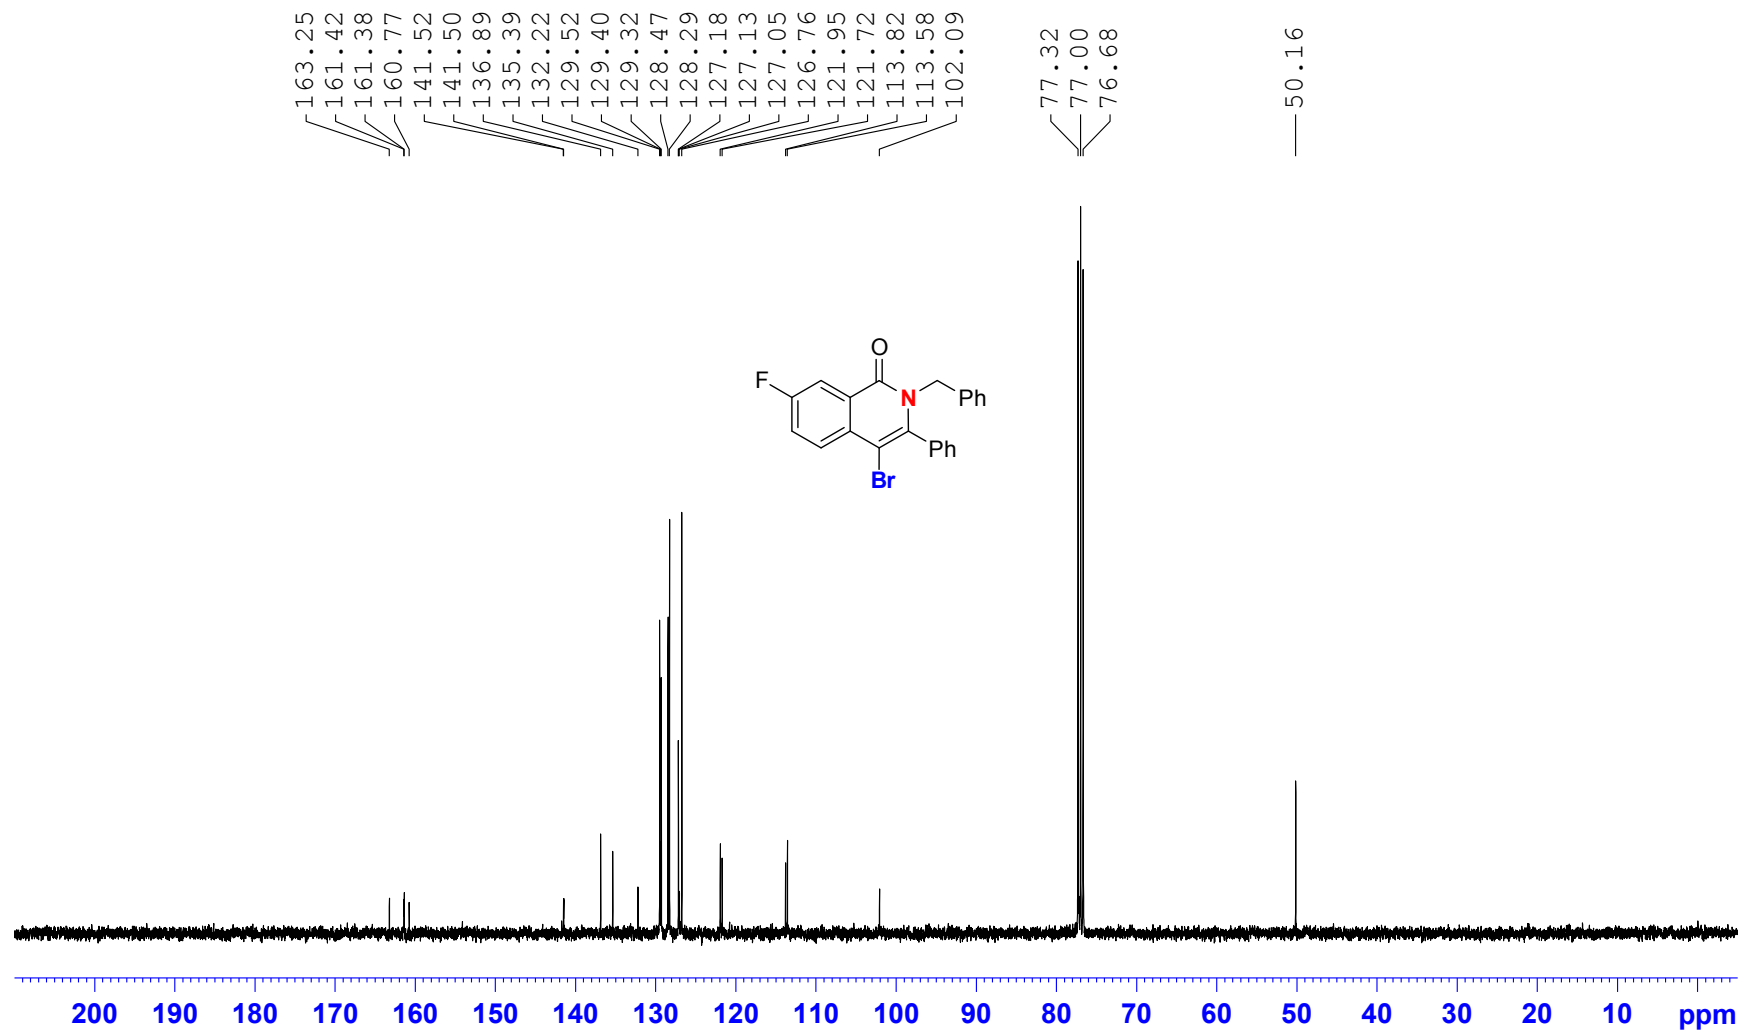

#### 4. $^1\text{H}$ and $^{13}\text{C}$ NMR spectrum of new compounds

$^1\text{H}$  NMR spectrum of **3ra** (400 MHz,  $\text{CDCl}_3$ )

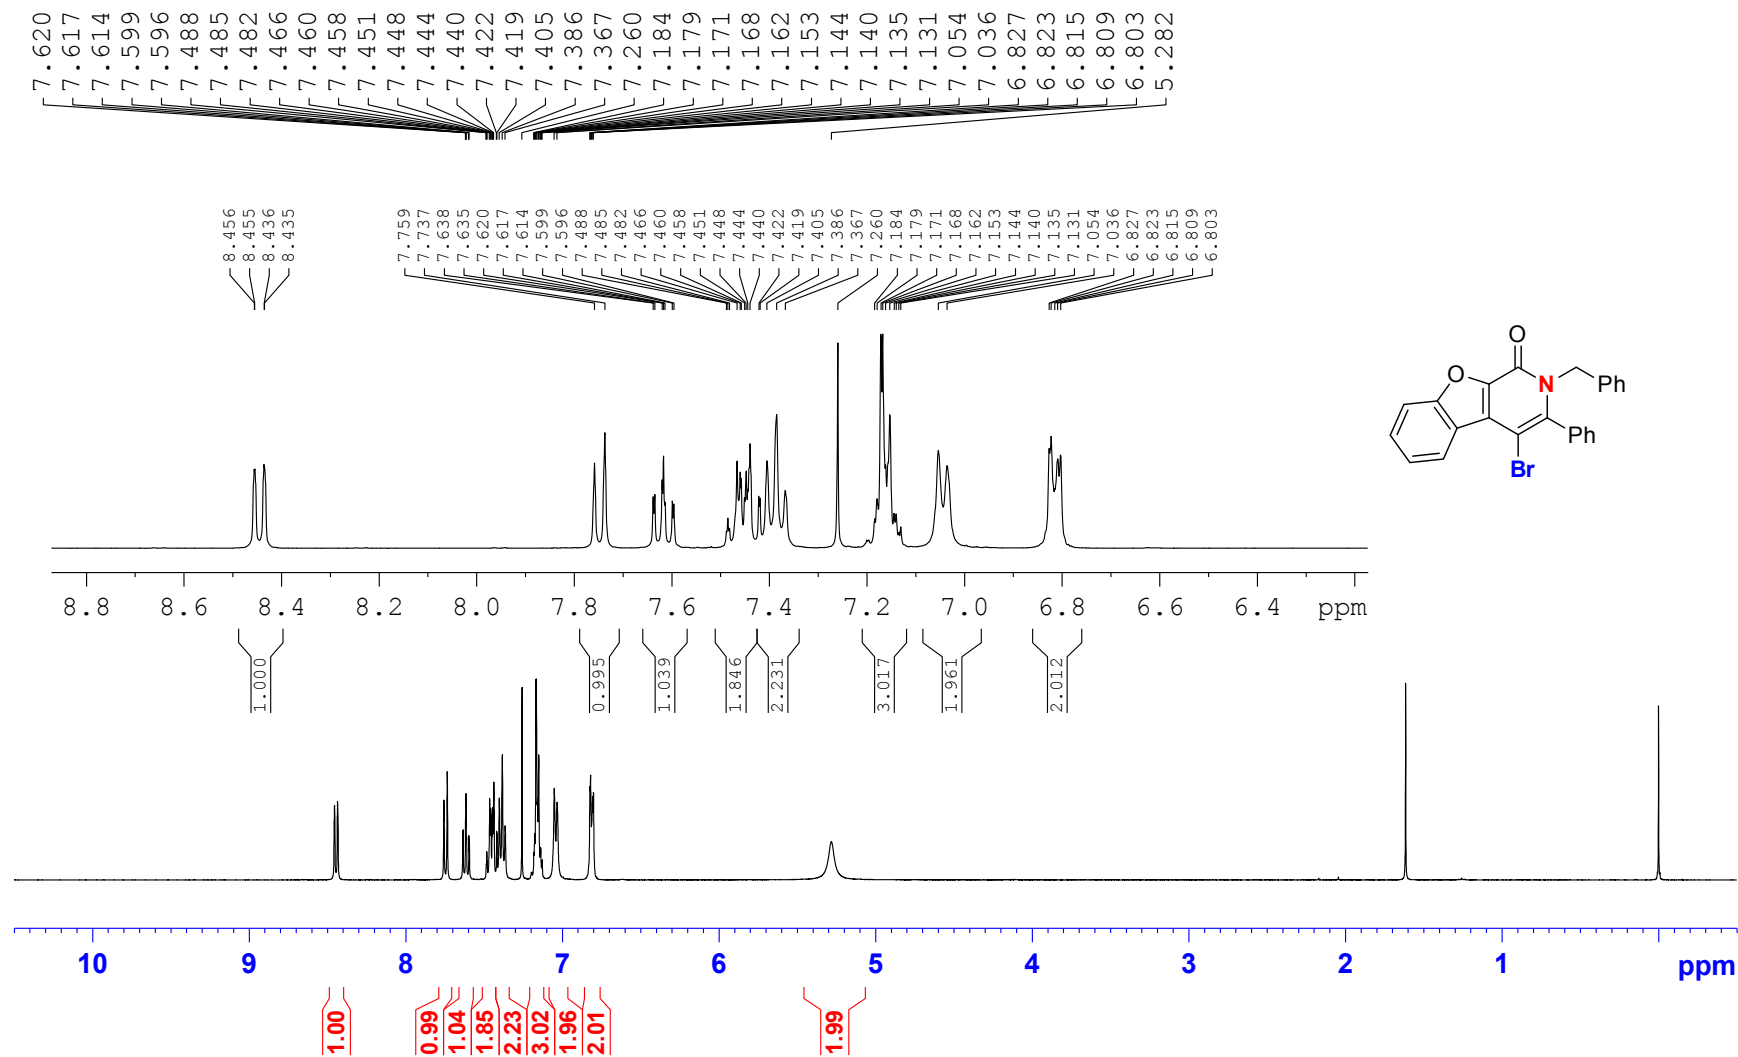

#### 4. $^1\text{H}$ and $^{13}\text{C}$ NMR spectrum of new compounds

$^{13}\text{C}$  NMR spectrum of **3ra** (400 MHz,  $\text{CDCl}_3$ )

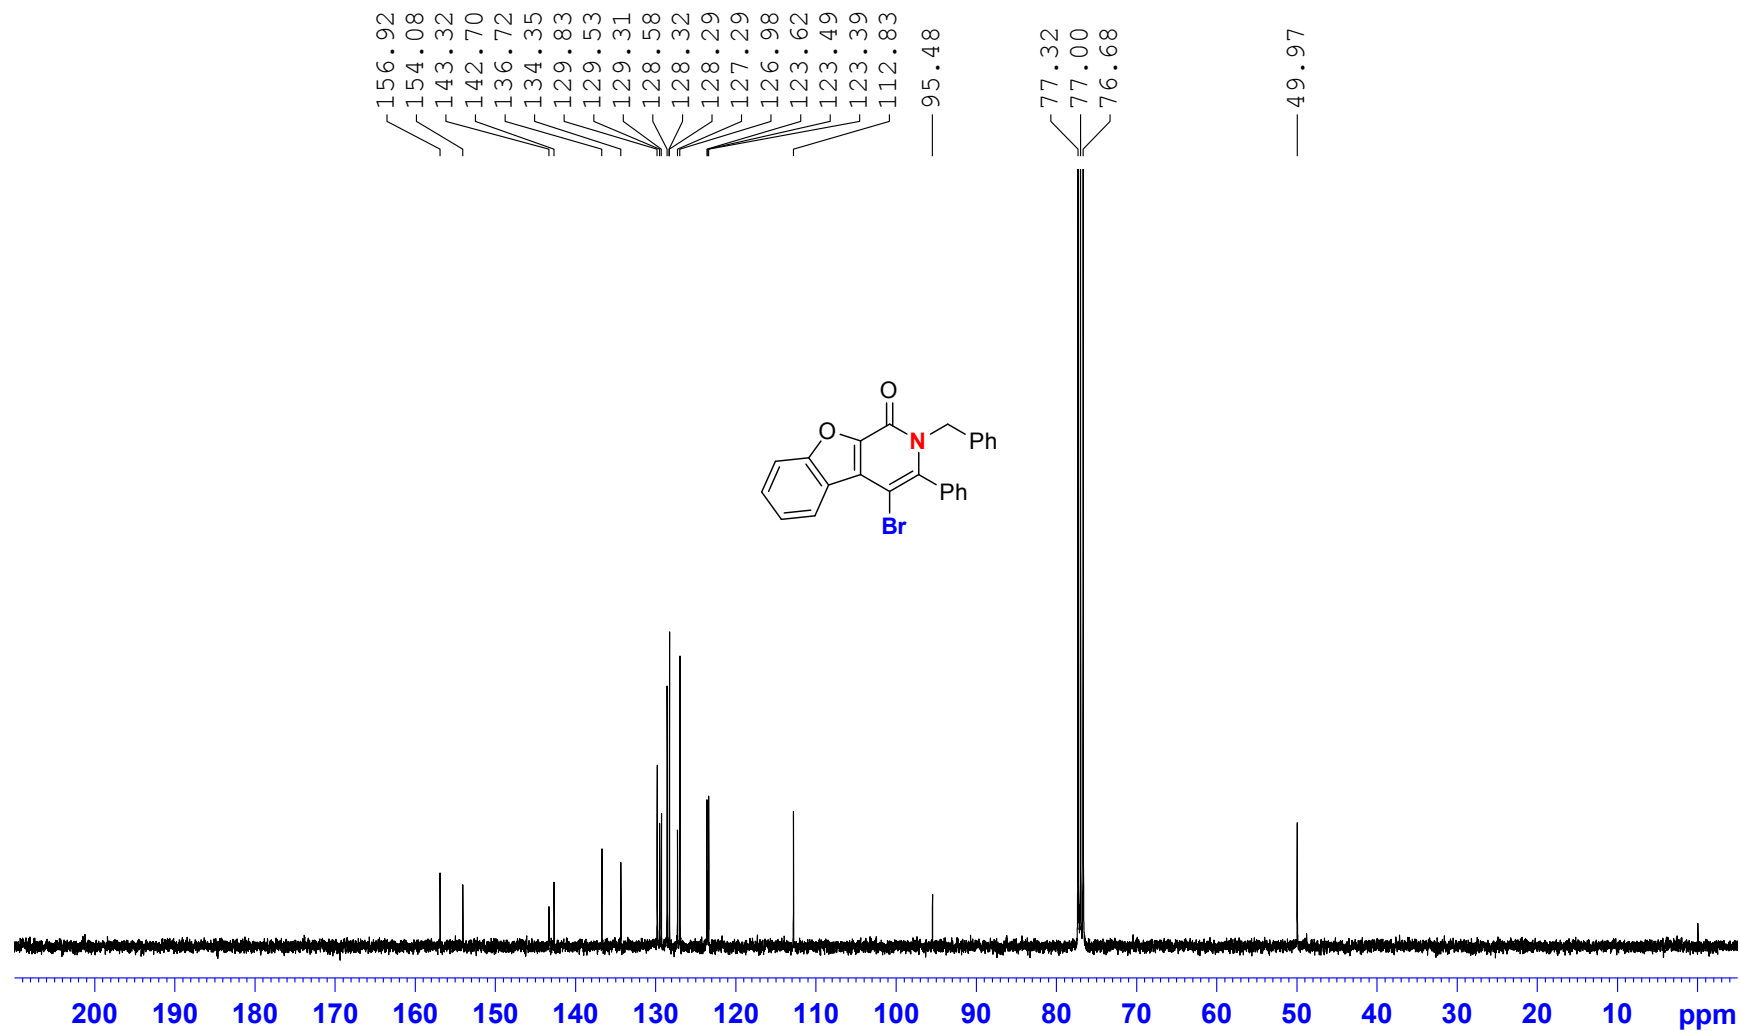

#### 4. $^1\text{H}$ and $^{13}\text{C}$ NMR spectrum of new compounds

$^1\text{H}$  NMR spectrum of **3sa** (400 MHz,  $\text{CDCl}_3$ )

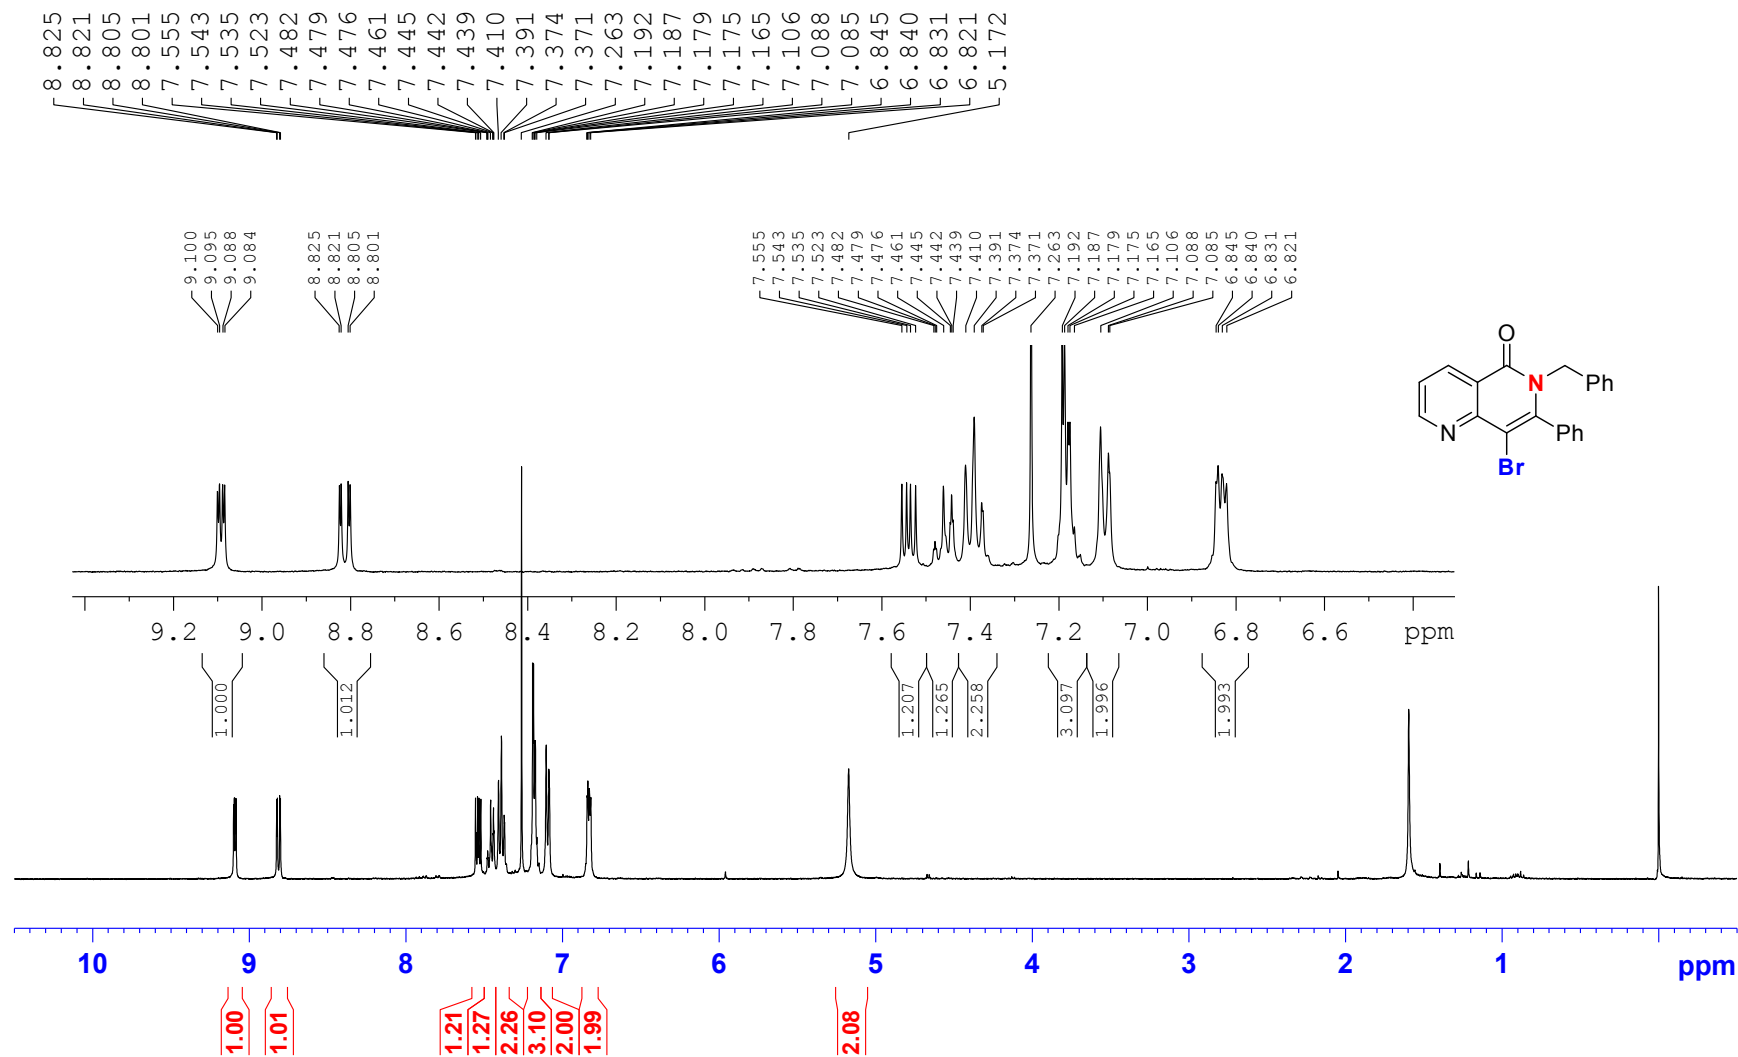

#### 4. $^1\text{H}$ and $^{13}\text{C}$ NMR spectrum of new compounds

$^{13}\text{C}$  NMR spectrum of **3sa** (400 MHz,  $\text{CDCl}_3$ )

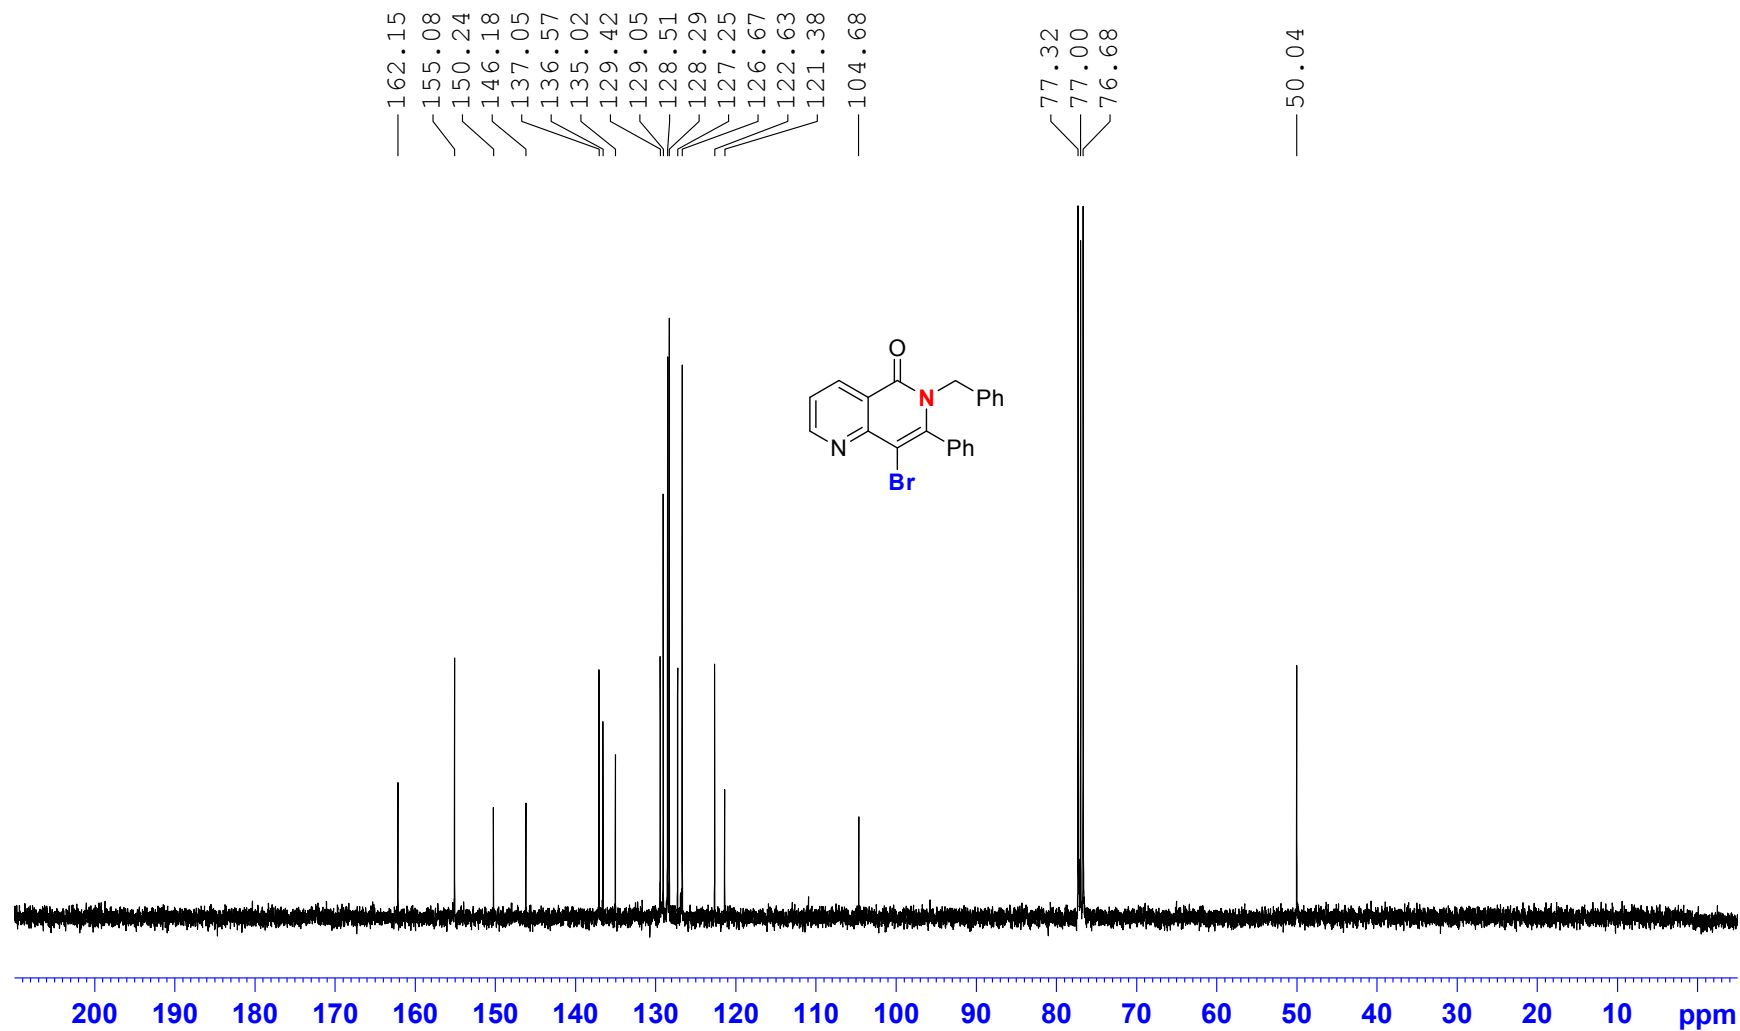

#### 4. $^1\text{H}$ and $^{13}\text{C}$ NMR spectrum of new compounds

$^1\text{H}$  NMR spectrum of **4sa** (400 MHz,  $\text{CDCl}_3$ )

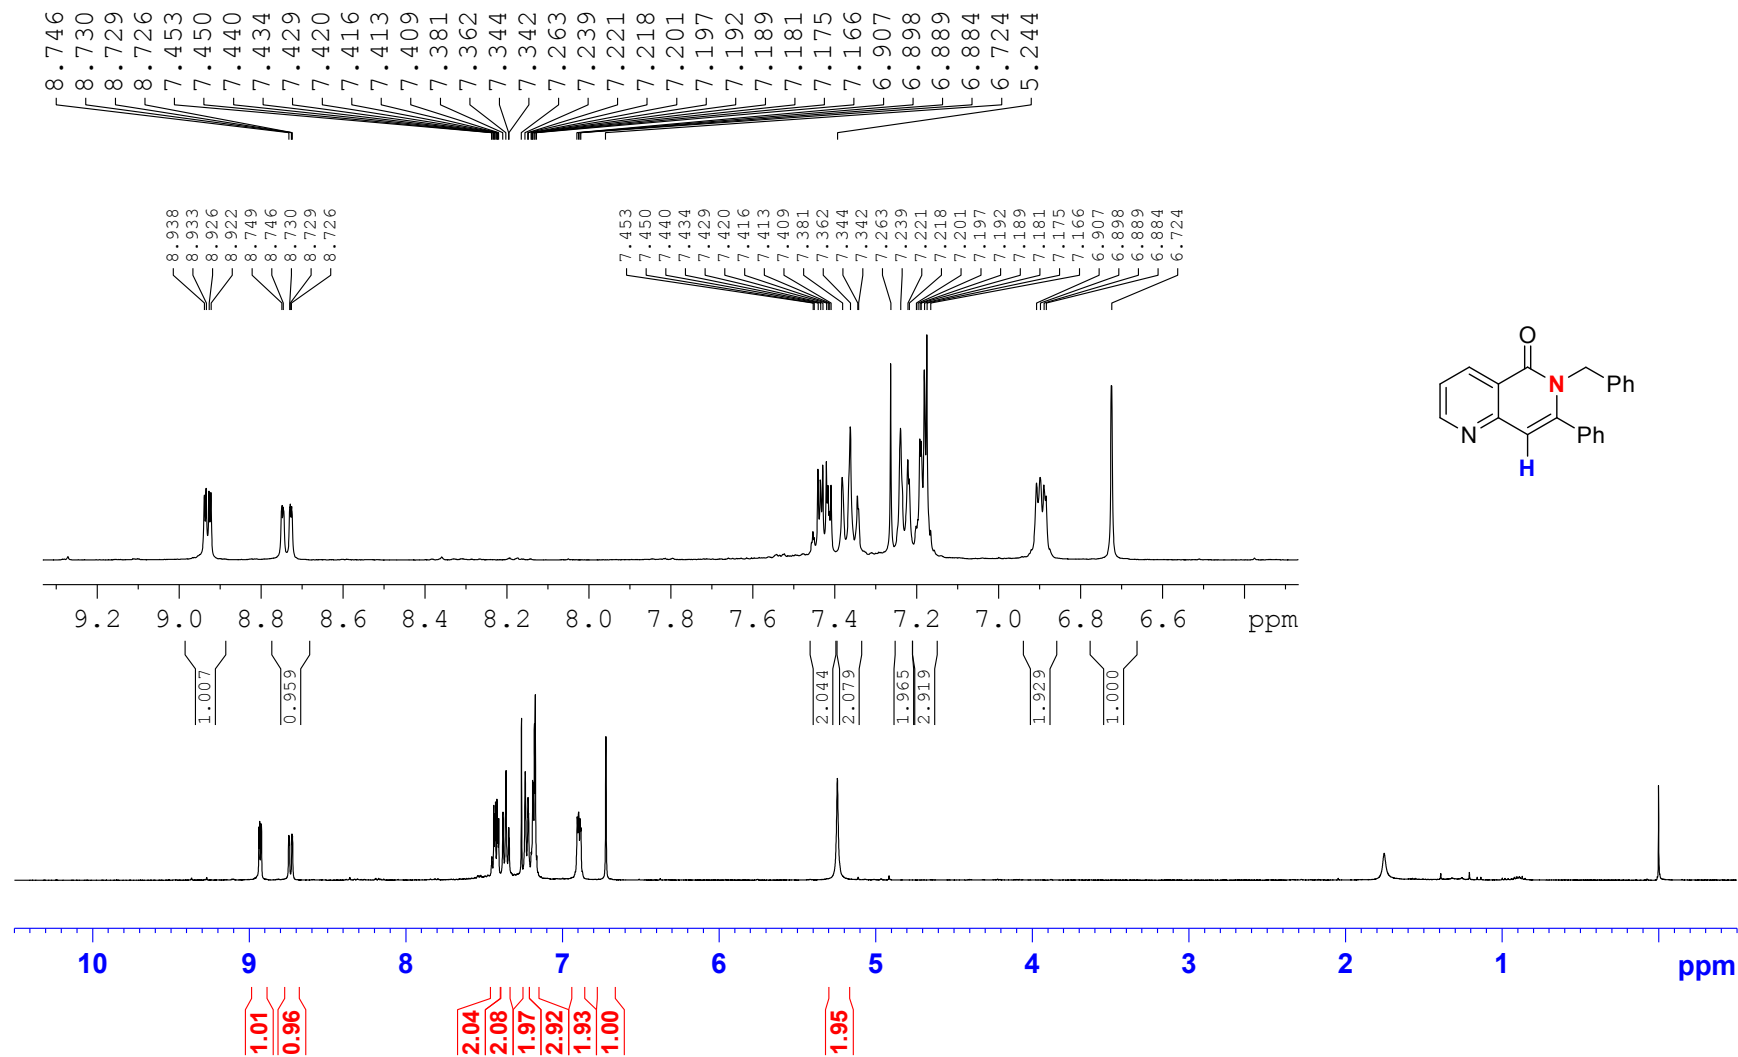



#### 4. $^1\text{H}$ and $^{13}\text{C}$ NMR spectrum of new compounds

$^{13}\text{C}$  NMR spectrum of **4sa** (400 MHz,  $\text{CDCl}_3$ )

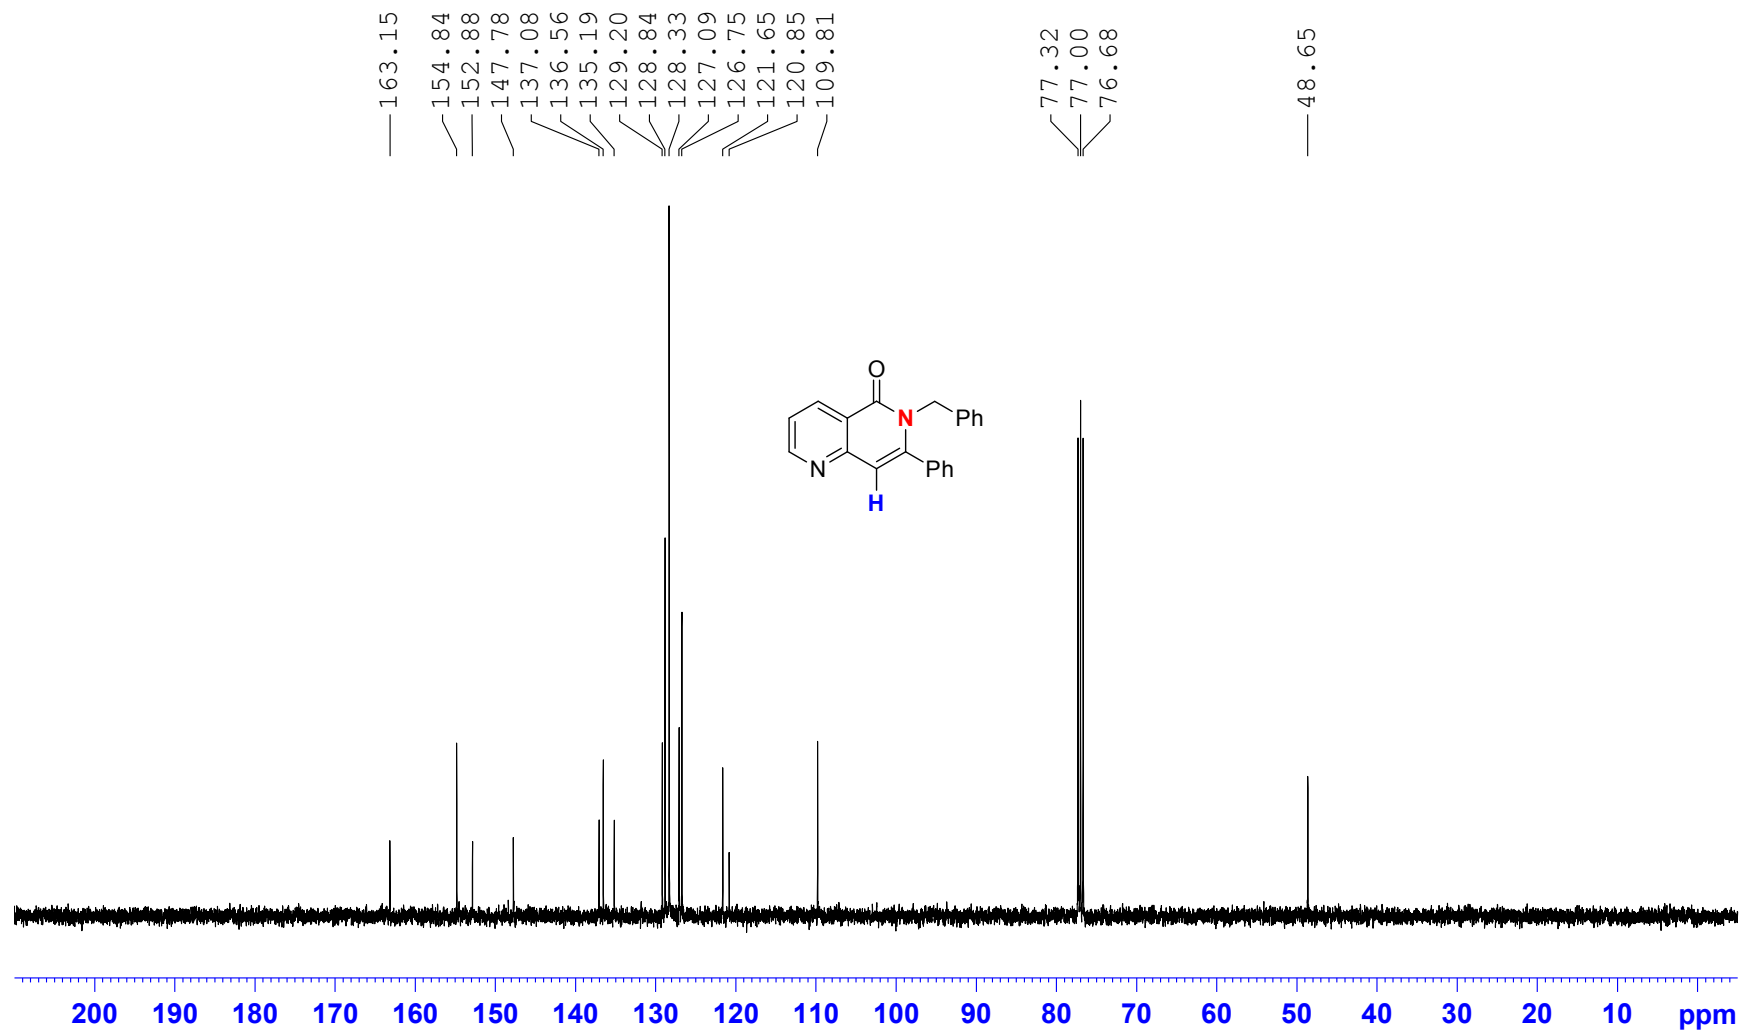

Supplement: c2cc33426g.pdf [file c2cc33426g.pdf]
